# Supplementary material for: Disruption of CPSF6 enhances cellular permissivity to HIV-1 infection through alternative polyadenylation
Source: Research Square preprint supplement (doi:10.21203/rs.3.rs-5099896/v1), 2024-12-04
Supplement: Supplementary file 1 [file 1ddeb06dea0f8cd77bae1348.xlsx]

## Sheet: Fig. 1 Statistics
Row Statistics
Figure	Panel	Sample	Treatment	Guide RNA	Readout	Mean	SD	N
1	c	Donor A, B, C, D	n/a	NT	Ghost Red Viability Stain, Percent viable cells (Ghost red-)	69.7717	1.72183	4
1	c	Donor A, B, C, D	n/a	CXCR4	Ghost Red Viability Stain, Percent viable cells (Ghost red-)	73.5332	3.79244	4
1	c	Donor A, B, C, D	n/a	CYPA	Ghost Red Viability Stain, Percent viable cells (Ghost red-)	73.2502	3.75082	4
1	c	Donor A, B, C, D	n/a	CPSF6 #5	Ghost Red Viability Stain, Percent viable cells (Ghost red-)	66.1998	7.03987	4
1	c	Donor A, B, C, D	n/a	CPSF6 #6	Ghost Red Viability Stain, Percent viable cells (Ghost red-)	66.6578	5.58286	4
1	d	Day 2 Donor A	DMSO	NT	Fold Change in HIV-1 Infected Cells (GFP+) Normalized to Non-Targeting per condition	1	0.186124	3
1	d	Day 2 Donor A	DMSO	CXCR4	Fold Change in HIV-1 Infected Cells (GFP+) Normalized to Non-Targeting per condition	0.00698267	0.0120943	3
1	d	Day 2 Donor A	DMSO	CYPA	Fold Change in HIV-1 Infected Cells (GFP+) Normalized to Non-Targeting per condition	0.370314	0.0454351	3
1	d	Day 2 Donor A	DMSO	CPSF6 #5	Fold Change in HIV-1 Infected Cells (GFP+) Normalized to Non-Targeting per condition	2.09958	0.294613	3
1	d	Day 2 Donor A	DMSO	CPSF6 #6	Fold Change in HIV-1 Infected Cells (GFP+) Normalized to Non-Targeting per condition	1.72741	0.0609827	3
1	d	Day 2 Donor A	SQV	NT	Fold Change in HIV-1 Infected Cells (GFP+) Normalized to Non-Targeting per condition	1	0.105772	3
1	d	Day 2 Donor A	SQV	CXCR4	Fold Change in HIV-1 Infected Cells (GFP+) Normalized to Non-Targeting per condition	0.009122	0.007902	3
1	d	Day 2 Donor A	SQV	CYPA	Fold Change in HIV-1 Infected Cells (GFP+) Normalized to Non-Targeting per condition	0.341607	0.038966	3
1	d	Day 2 Donor A	SQV	CPSF6 #5	Fold Change in HIV-1 Infected Cells (GFP+) Normalized to Non-Targeting per condition	1.45324	0.131769	3
1	d	Day 2 Donor A	SQV	CPSF6 #6	Fold Change in HIV-1 Infected Cells (GFP+) Normalized to Non-Targeting per condition	1.48768	0.092496	3
1	d	Day 2 Donor A	DMSO	NT	Fold Change in HIV-1 Infected Cells (GFP+) Normalized to Non-Targeting per condition	1	0.22988	3
1	d	Day 2 Donor A	DMSO	CXCR4	Fold Change in HIV-1 Infected Cells (GFP+) Normalized to Non-Targeting per condition	0	0	3
1	d	Day 2 Donor A	DMSO	CYPA	Fold Change in HIV-1 Infected Cells (GFP+) Normalized to Non-Targeting per condition	0.353225	0.0970256	3
1	d	Day 2 Donor A	DMSO	CPSF6 #5	Fold Change in HIV-1 Infected Cells (GFP+) Normalized to Non-Targeting per condition	2.01063	0.308413	3
1	d	Day 2 Donor A	DMSO	CPSF6 #6	Fold Change in HIV-1 Infected Cells (GFP+) Normalized to Non-Targeting per condition	2.52392	0.374669	3
1	d	Day 2 Donor A	SQV	NT	Fold Change in HIV-1 Infected Cells (GFP+) Normalized to Non-Targeting per condition	1	0.10547	3
1	d	Day 2 Donor A	SQV	CXCR4	Fold Change in HIV-1 Infected Cells (GFP+) Normalized to Non-Targeting per condition	0	0	3
1	d	Day 2 Donor A	SQV	CYPA	Fold Change in HIV-1 Infected Cells (GFP+) Normalized to Non-Targeting per condition	0.416822	0.0709585	3
1	d	Day 2 Donor A	SQV	CPSF6 #5	Fold Change in HIV-1 Infected Cells (GFP+) Normalized to Non-Targeting per condition	2.06489	0.845649	3
1	d	Day 2 Donor A	SQV	CPSF6 #6	Fold Change in HIV-1 Infected Cells (GFP+) Normalized to Non-Targeting per condition	1.9618	0.544979	3
1	d	Day 2 Donor A	DMSO	NT	Fold Change in HIV-1 Infected Cells (GFP+) Normalized to Non-Targeting per condition	1	0.284537	3
1	d	Day 2 Donor A	DMSO	CXCR4	Fold Change in HIV-1 Infected Cells (GFP+) Normalized to Non-Targeting per condition	0.0297687	0.0409498	3
1	d	Day 2 Donor A	DMSO	CYPA	Fold Change in HIV-1 Infected Cells (GFP+) Normalized to Non-Targeting per condition	0.391304	0.0101863	3
1	d	Day 2 Donor A	DMSO	CPSF6 #5	Fold Change in HIV-1 Infected Cells (GFP+) Normalized to Non-Targeting per condition	1.66001	0.0707869	3
1	d	Day 2 Donor A	DMSO	CPSF6 #6	Fold Change in HIV-1 Infected Cells (GFP+) Normalized to Non-Targeting per condition	2.01767	0.137744	3
1	d	Day 2 Donor A	SQV	NT	Fold Change in HIV-1 Infected Cells (GFP+) Normalized to Non-Targeting per condition	1	0.19789	3
1	d	Day 2 Donor A	SQV	CXCR4	Fold Change in HIV-1 Infected Cells (GFP+) Normalized to Non-Targeting per condition	0.0126823	0.0219664	3
1	d	Day 2 Donor A	SQV	CYPA	Fold Change in HIV-1 Infected Cells (GFP+) Normalized to Non-Targeting per condition	0.446343	0.212228	3
1	d	Day 2 Donor A	SQV	CPSF6 #5	Fold Change in HIV-1 Infected Cells (GFP+) Normalized to Non-Targeting per condition	1.62884	0.558247	3
1	d	Day 2 Donor A	SQV	CPSF6 #6	Fold Change in HIV-1 Infected Cells (GFP+) Normalized to Non-Targeting per condition	1.73771	0.557992	3
1	d	Day 2 Donor A	DMSO	NT	Fold Change in HIV-1 Infected Cells (GFP+) Normalized to Non-Targeting per condition	1	0.278986	3
1	d	Day 2 Donor A	DMSO	CXCR4	Fold Change in HIV-1 Infected Cells (GFP+) Normalized to Non-Targeting per condition	0.0236583	0.00730252	3
1	d	Day 2 Donor A	DMSO	CYPA	Fold Change in HIV-1 Infected Cells (GFP+) Normalized to Non-Targeting per condition	0.418262	0.131512	3
1	d	Day 2 Donor A	DMSO	CPSF6 #5	Fold Change in HIV-1 Infected Cells (GFP+) Normalized to Non-Targeting per condition	3.97458	0.604815	3
1	d	Day 2 Donor A	DMSO	CPSF6 #6	Fold Change in HIV-1 Infected Cells (GFP+) Normalized to Non-Targeting per condition	5.24862	0.824702	3
1	d	Day 2 Donor A	SQV	NT	Fold Change in HIV-1 Infected Cells (GFP+) Normalized to Non-Targeting per condition	1	0.16858	3
1	d	Day 2 Donor A	SQV	CXCR4	Fold Change in HIV-1 Infected Cells (GFP+) Normalized to Non-Targeting per condition	0.0129667	0.00121822	3
1	d	Day 2 Donor A	SQV	CYPA	Fold Change in HIV-1 Infected Cells (GFP+) Normalized to Non-Targeting per condition	0.38741	0.0439311	3
1	d	Day 2 Donor A	SQV	CPSF6 #5	Fold Change in HIV-1 Infected Cells (GFP+) Normalized to Non-Targeting per condition	2.69034	0.440001	3
1	d	Day 2 Donor A	SQV	CPSF6 #6	Fold Change in HIV-1 Infected Cells (GFP+) Normalized to Non-Targeting per condition	2.85584	0.597006	3
1	d	Day 5 Donor A	DMSO	NT	Fold Change in HIV-1 Infected Cells (GFP+) Normalized to Non-Targeting per condition	1	0.0859339	3
1	d	Day 5 Donor A	DMSO	CXCR4	Fold Change in HIV-1 Infected Cells (GFP+) Normalized to Non-Targeting per condition	0	0	3
1	d	Day 5 Donor A	DMSO	CYPA	Fold Change in HIV-1 Infected Cells (GFP+) Normalized to Non-Targeting per condition	0.181896	0.0108931	3
1	d	Day 5 Donor A	DMSO	CPSF6 #5	Fold Change in HIV-1 Infected Cells (GFP+) Normalized to Non-Targeting per condition	3.92179	0.650914	3
1	d	Day 5 Donor A	DMSO	CPSF6 #6	Fold Change in HIV-1 Infected Cells (GFP+) Normalized to Non-Targeting per condition	3.79833	0.165033	3
1	d	Day 5 Donor A	SQV	NT	Fold Change in HIV-1 Infected Cells (GFP+) Normalized to Non-Targeting per condition	1	0.169081	3
1	d	Day 5 Donor A	SQV	CXCR4	Fold Change in HIV-1 Infected Cells (GFP+) Normalized to Non-Targeting per condition	0.00691767	0.0119818	3
1	d	Day 5 Donor A	SQV	CYPA	Fold Change in HIV-1 Infected Cells (GFP+) Normalized to Non-Targeting per condition	0.32995	0.0728781	3
1	d	Day 5 Donor A	SQV	CPSF6 #5	Fold Change in HIV-1 Infected Cells (GFP+) Normalized to Non-Targeting per condition	0.799451	0.126278	3
1	d	Day 5 Donor A	SQV	CPSF6 #6	Fold Change in HIV-1 Infected Cells (GFP+) Normalized to Non-Targeting per condition	1.21301	0.331973	3
1	d	Day 5 Donor B	DMSO	NT	Fold Change in HIV-1 Infected Cells (GFP+) Normalized to Non-Targeting per condition	1	0.116526	3
1	d	Day 5 Donor B	DMSO	CXCR4	Fold Change in HIV-1 Infected Cells (GFP+) Normalized to Non-Targeting per condition	0.00159433	0.00142502	3
1	d	Day 5 Donor B	DMSO	CYPA	Fold Change in HIV-1 Infected Cells (GFP+) Normalized to Non-Targeting per condition	0.177751	0.0241112	3
1	d	Day 5 Donor B	DMSO	CPSF6 #5	Fold Change in HIV-1 Infected Cells (GFP+) Normalized to Non-Targeting per condition	4.69241	1.05843	3
1	d	Day 5 Donor B	DMSO	CPSF6 #6	Fold Change in HIV-1 Infected Cells (GFP+) Normalized to Non-Targeting per condition	8.76484	1.07443	3
1	d	Day 5 Donor B	SQV	NT	Fold Change in HIV-1 Infected Cells (GFP+) Normalized to Non-Targeting per condition	1	0.186425	3
1	d	Day 5 Donor B	SQV	CXCR4	Fold Change in HIV-1 Infected Cells (GFP+) Normalized to Non-Targeting per condition	0	0	3
1	d	Day 5 Donor B	SQV	CYPA	Fold Change in HIV-1 Infected Cells (GFP+) Normalized to Non-Targeting per condition	0.508654	0.272145	3
1	d	Day 5 Donor B	SQV	CPSF6 #5	Fold Change in HIV-1 Infected Cells (GFP+) Normalized to Non-Targeting per condition	1.23307	0.528282	3
1	d	Day 5 Donor B	SQV	CPSF6 #6	Fold Change in HIV-1 Infected Cells (GFP+) Normalized to Non-Targeting per condition	1.58051	0.394937	3
1	d	Day 5 Donor C	DMSO	NT	Fold Change in HIV-1 Infected Cells (GFP+) Normalized to Non-Targeting per condition	1	0.325185	3
1	d	Day 5 Donor C	DMSO	CXCR4	Fold Change in HIV-1 Infected Cells (GFP+) Normalized to Non-Targeting per condition	0	0	3
1	d	Day 5 Donor C	DMSO	CYPA	Fold Change in HIV-1 Infected Cells (GFP+) Normalized to Non-Targeting per condition	0.120646	0.029737	3
1	d	Day 5 Donor C	DMSO	CPSF6 #5	Fold Change in HIV-1 Infected Cells (GFP+) Normalized to Non-Targeting per condition	4.19788	0.223879	3
1	d	Day 5 Donor C	DMSO	CPSF6 #6	Fold Change in HIV-1 Infected Cells (GFP+) Normalized to Non-Targeting per condition	4.4132	1.13502	3
1	d	Day 5 Donor C	SQV	NT	Fold Change in HIV-1 Infected Cells (GFP+) Normalized to Non-Targeting per condition	1	0.0353132	3
1	d	Day 5 Donor C	SQV	CXCR4	Fold Change in HIV-1 Infected Cells (GFP+) Normalized to Non-Targeting per condition	0	0	3
1	d	Day 5 Donor C	SQV	CYPA	Fold Change in HIV-1 Infected Cells (GFP+) Normalized to Non-Targeting per condition	0.600911	0.108469	3
1	d	Day 5 Donor C	SQV	CPSF6 #5	Fold Change in HIV-1 Infected Cells (GFP+) Normalized to Non-Targeting per condition	1.35748	0.44379	3
1	d	Day 5 Donor C	SQV	CPSF6 #6	Fold Change in HIV-1 Infected Cells (GFP+) Normalized to Non-Targeting per condition	2.8916	0.1685	3
1	d	Day 5 Donor D	DMSO	NT	Fold Change in HIV-1 Infected Cells (GFP+) Normalized to Non-Targeting per condition	1	0.288704	3
1	d	Day 5 Donor D	DMSO	CXCR4	Fold Change in HIV-1 Infected Cells (GFP+) Normalized to Non-Targeting per condition	0.000815667	0.00141278	3
1	d	Day 5 Donor D	DMSO	CYPA	Fold Change in HIV-1 Infected Cells (GFP+) Normalized to Non-Targeting per condition	0.174285	0.0191034	3
1	d	Day 5 Donor D	DMSO	CPSF6 #5	Fold Change in HIV-1 Infected Cells (GFP+) Normalized to Non-Targeting per condition	5.92993	0.736781	3
1	d	Day 5 Donor D	DMSO	CPSF6 #6	Fold Change in HIV-1 Infected Cells (GFP+) Normalized to Non-Targeting per condition	9.34906	0.827647	3
1	d	Day 5 Donor D	SQV	NT	Fold Change in HIV-1 Infected Cells (GFP+) Normalized to Non-Targeting per condition	1	0.239059	3
1	d	Day 5 Donor D	SQV	CXCR4	Fold Change in HIV-1 Infected Cells (GFP+) Normalized to Non-Targeting per condition	0	0	3
1	d	Day 5 Donor D	SQV	CYPA	Fold Change in HIV-1 Infected Cells (GFP+) Normalized to Non-Targeting per condition	0.336629	0.0697752	3
1	d	Day 5 Donor D	SQV	CPSF6 #5	Fold Change in HIV-1 Infected Cells (GFP+) Normalized to Non-Targeting per condition	2.67594	0.359327	3
1	d	Day 5 Donor D	SQV	CPSF6 #6	Fold Change in HIV-1 Infected Cells (GFP+) Normalized to Non-Targeting per condition	2.36469	0.548399	3
Significance Tests
Figure	Panel	Sample	Treatment	Test	Comparison	Mean 1	Mean 2	Mean Diff.	SE of diff.	n1	n2	q	DF	Mean Diff.	95.00% CI of diff.	Below threshold? (Alpha = 0.05)	Summary	Adjusted P Value
1	c	Donors A-D CXCR4	n/a	Two-way ANOVA with Dunnett's multiple comparison's test	NT vs. CXCR4	69.77	73.53	-3.762	2.621	4	4	1.435	12	-3.762	-11.12 to 3.595	No	ns	0.443691
1	c	Donors A-D CYPA	n/a	Two-way ANOVA with Dunnett's multiple comparison's test	NT vs. CYPA	69.77	73.25	-3.479	2.621	4	4	1.327	12	-3.479	-10.84 to 3.878	No	ns	0.507535
1	c	Donors A-D CPSF6 #5	n/a	Two-way ANOVA with Dunnett's multiple comparison's test	NT vs. CPSF6 #5	69.77	66.2	3.572	2.621	4	4	1.363	12	3.572	-3.785 to 10.93	No	ns	0.485979
1	c	Donors A-D CPSF6 #6	n/a	Two-way ANOVA with Dunnett's multiple comparison's test	NT vs. CPSF6 #6	69.77	66.66	3.114	2.621	4	4	1.188	12	3.114	-4.243 to 10.47	No	ns	0.595259
1	d	Day 2 Donor A	DMSO	One-way ANOVA with Dunnett's multiple comparison's test	NT vs. CPSF6 #5	1	2.1	-1.1	0.1303	3	3	8.438	10	-1.1	-1.476 to -0.7229	Yes	****	2.58826e-05
1	d	Day 2 Donor A	DMSO	One-way ANOVA with Dunnett's multiple comparison's test	NT vs. CPSF6 #6	1	1.727	-0.7274	0.1303	3	3	5.582	10	-0.7274	-1.104 to -0.3507	Yes	***	0.000800911
1	d	Day 2 Donor B	DMSO	One-way ANOVA with Dunnett's multiple comparison's test	NT vs. CPSF6 #5	1	2.011	-1.011	0.1992	3	3	5.072	10	-1.011	-1.587 to -0.4347	Yes	**	0.00164315
1	d	Day 2 Donor B	DMSO	One-way ANOVA with Dunnett's multiple comparison's test	NT vs. CPSF6 #6	1	2.524	-1.524	0.1992	3	3	7.648	10	-1.524	-2.100 to -0.9480	Yes	****	6.09766e-05
1	d	Day 2 Donor C	DMSO	One-way ANOVA with Dunnett's multiple comparison's test	NT vs. CPSF6 #5	1	1.66	-0.66	0.1193	3	3	5.533	10	-0.66	-1.005 to -0.3152	Yes	***	0.000856979
1	d	Day 2 Donor C	DMSO	One-way ANOVA with Dunnett's multiple comparison's test	NT vs. CPSF6 #6	1	2.018	-1.018	0.1193	3	3	8.531	10	-1.018	-1.362 to -0.6729	Yes	****	2.34832e-05
1	d	Day 2 Donor D	DMSO	One-way ANOVA with Dunnett's multiple comparison's test	NT vs. CPSF6 #5	1	3.975	-2.975	0.3901	3	3	7.626	10	-2.975	-4.102 to -1.847	Yes	****	6.25328e-05
1	d	Day 2 Donor D	DMSO	One-way ANOVA with Dunnett's multiple comparison's test	NT vs. CPSF6 #6	1	5.249	-4.249	0.3901	3	3	10.89	10	-4.249	-5.376 to -3.121	Yes	****	2.56e-06
1	d	Day 2 Donor A	SQV	One-way ANOVA with Dunnett's multiple comparison's test	NT vs. CPSF6 #5	1	1.453	-0.4532	0.07182	3	3	6.311	10	-0.4532	-0.6608 to -0.2456	Yes	***	0.000304191
1	d	Day 2 Donor A	SQV	One-way ANOVA with Dunnett's multiple comparison's test	NT vs. CPSF6 #6	1	1.488	-0.4877	0.07182	3	3	6.79	10	-0.4877	-0.6953 to -0.2801	Yes	***	0.000166906
1	d	Day 2 Donor B	SQV	One-way ANOVA with Dunnett's multiple comparison's test	NT vs. CPSF6 #5	1	2.065	-1.065	0.3703	3	3	2.876	10	-1.065	-2.135 to 0.005415	No	ns	0.0512031
1	d	Day 2 Donor B	SQV	One-way ANOVA with Dunnett's multiple comparison's test	NT vs. CPSF6 #6	1	1.962	-0.9618	0.3703	3	3	2.598	10	-0.9618	-2.032 to 0.1085	No	ns	0.0805138
1	d	Day 2 Donor C	SQV	One-way ANOVA with Dunnett's multiple comparison's test	NT vs. CPSF6 #5	1	1.629	-0.6288	0.3072	3	3	2.047	10	-0.6288	-1.517 to 0.2591	No	ns	0.191464
1	d	Day 2 Donor C	SQV	One-way ANOVA with Dunnett's multiple comparison's test	NT vs. CPSF6 #6	1	1.738	-0.7377	0.3072	3	3	2.402	10	-0.7377	-1.626 to 0.1502	No	ns	0.11026
1	d	Day 2 Donor D	SQV	One-way ANOVA with Dunnett's multiple comparison's test	NT vs. CPSF6 #5	1	2.69	-1.69	0.2782	3	3	6.076	10	-1.69	-2.494 to -0.8863	Yes	***	0.000412115
1	d	Day 2 Donor D	SQV	One-way ANOVA with Dunnett's multiple comparison's test	NT vs. CPSF6 #6	1	2.856	-1.856	0.2782	3	3	6.671	10	-1.856	-2.660 to -1.052	Yes	***	0.000193153
1	d	Day 5 Donor A	DMSO	One-way ANOVA with Dunnett's multiple comparison's test	NT vs. CPSF6 #5	1	3.922	-2.922	0.2472	3	3	11.82	10	-2.922	-3.636 to -2.207	Yes	****	1.1972e-06
1	d	Day 5 Donor A	DMSO	One-way ANOVA with Dunnett's multiple comparison's test	NT vs. CPSF6 #6	1	3.798	-2.798	0.2472	3	3	11.32	10	-2.798	-3.513 to -2.084	Yes	****	1.7919e-06
1	d	Day 5 Donor B	DMSO	One-way ANOVA with Dunnett's multiple comparison's test	NT vs. CPSF6 #5	1	4.692	-3.692	0.5524	3	3	6.684	10	-3.692	-5.289 to -2.096	Yes	***	0.000190182
1	d	Day 5 Donor B	DMSO	One-way ANOVA with Dunnett's multiple comparison's test	NT vs. CPSF6 #6	1	8.765	-7.765	0.5524	3	3	14.06	10	-7.765	-9.362 to -6.168	Yes	****	2.321e-07
1	d	Day 5 Donor C	DMSO	One-way ANOVA with Dunnett's multiple comparison's test	NT vs. CPSF6 #5	1	4.198	-3.198	0.4389	3	3	7.285	10	-3.198	-4.467 to -1.929	Yes	****	9.24024e-05
1	d	Day 5 Donor C	DMSO	One-way ANOVA with Dunnett's multiple comparison's test	NT vs. CPSF6 #6	1	4.413	-3.413	0.4389	3	3	7.776	10	-3.413	-4.682 to -2.144	Yes	****	5.28557e-05
1	d	Day 5 Donor D	DMSO	One-way ANOVA with Dunnett's multiple comparison's test	NT vs. CPSF6 #5	1	5.93	-4.93	0.4182	3	3	11.79	10	-4.93	-6.139 to -3.721	Yes	****	1.2251e-06
1	d	Day 5 Donor D	DMSO	One-way ANOVA with Dunnett's multiple comparison's test	NT vs. CPSF6 #6	1	9.349	-8.349	0.4182	3	3	19.97	10	-8.349	-9.558 to -7.140	Yes	****	7.8e-09
1	d	Day 5 Donor A	SQV	One-way ANOVA with Dunnett's multiple comparison's test	NT vs. CPSF6 #5	1	0.7995	0.2005	0.1461	3	3	1.372	10	0.2005	-0.2219 to 0.6230	No	ns	0.486054
1	d	Day 5 Donor A	SQV	One-way ANOVA with Dunnett's multiple comparison's test	NT vs. CPSF6 #6	1	1.213	-0.213	0.1461	3	3	1.457	10	-0.213	-0.6355 to 0.2094	No	ns	0.437704
1	d	Day 5 Donor B	SQV	One-way ANOVA with Dunnett's multiple comparison's test	NT vs. CPSF6 #5	1	1.233	-0.2331	0.2693	3	3	0.8655	10	-0.2331	-1.011 to 0.5453	No	ns	0.800941
1	d	Day 5 Donor B	SQV	One-way ANOVA with Dunnett's multiple comparison's test	NT vs. CPSF6 #6	1	1.581	-0.5805	0.2693	3	3	2.156	10	-0.5805	-1.359 to 0.1979	No	ns	0.162173
1	d	Day 5 Donor C	SQV	One-way ANOVA with Dunnett's multiple comparison's test	NT vs. CPSF6 #5	1	1.357	-0.3575	0.1783	3	3	2.005	10	-0.3575	-0.8728 to 0.1578	No	ns	0.203951
1	d	Day 5 Donor C	SQV	One-way ANOVA with Dunnett's multiple comparison's test	NT vs. CPSF6 #6	1	2.892	-1.892	0.1783	3	3	10.61	10	-1.892	-2.407 to -1.376	Yes	****	3.2606e-06
1	d	Day 5 Donor D	SQV	One-way ANOVA with Dunnett's multiple comparison's test	NT vs. CPSF6 #5	1	2.676	-1.676	0.2561	3	3	6.544	10	-1.676	-2.416 to -0.9357	Yes	***	0.000226277
1	d	Day 5 Donor D	SQV	One-way ANOVA with Dunnett's multiple comparison's test	NT vs. CPSF6 #6	1	2.365	-1.365	0.2561	3	3	5.329	10	-1.365	-2.105 to -0.6244	Yes	**	0.00113924

## Sheet: Fig. 2 Statistics
Row Statistics
Figure	Panel	Sample	Treatment	Guide RNA	Readout	Mean	SD	N
2	c	Donor E	n/a	NT #3	Fold Change in HIV-1 Infected Cells (GFP+) Normalized to Non-Targeting #3 per condition	1	0.11089	3
2	c	Donor E	n/a	NT #4	Fold Change in HIV-1 Infected Cells (GFP+) Normalized to Non-Targeting #3 per condition	1.1197	0.194672	3
2	c	Donor E	n/a	CPSF6 #5	Fold Change in HIV-1 Infected Cells (GFP+) Normalized to Non-Targeting #3 per condition	2.57488	0.149659	3
2	c	Donor E	n/a	CPSF6 #6	Fold Change in HIV-1 Infected Cells (GFP+) Normalized to Non-Targeting #3 per condition	3.9815	0.44646	3
2	c	Donor E	n/a	TRIM5α #6	Fold Change in HIV-1 Infected Cells (GFP+) Normalized to Non-Targeting #3 per condition	1.19326	0.211845	3
2	c	Donor E	n/a	TRIM5α #7	Fold Change in HIV-1 Infected Cells (GFP+) Normalized to Non-Targeting #3 per condition	1.04412	0.0890266	3
2	c	Donor F	n/a	NT #3	Fold Change in HIV-1 Infected Cells (GFP+) Normalized to Non-Targeting #3 per condition	1	0.0725725	3
2	c	Donor F	n/a	NT #4	Fold Change in HIV-1 Infected Cells (GFP+) Normalized to Non-Targeting #3 per condition	0.905453	0.141413	3
2	c	Donor F	n/a	CPSF6 #5	Fold Change in HIV-1 Infected Cells (GFP+) Normalized to Non-Targeting #3 per condition	1.13973	0.0587657	3
2	c	Donor F	n/a	CPSF6 #6	Fold Change in HIV-1 Infected Cells (GFP+) Normalized to Non-Targeting #3 per condition	1.72278	0.343913	3
2	c	Donor F	n/a	TRIM5α #6	Fold Change in HIV-1 Infected Cells (GFP+) Normalized to Non-Targeting #3 per condition	0.991653	0.0562164	3
2	c	Donor F	n/a	TRIM5α #7	Fold Change in HIV-1 Infected Cells (GFP+) Normalized to Non-Targeting #3 per condition	1.01844	0.179378	3
2	c	Donor G	n/a	NT #3	Fold Change in HIV-1 Infected Cells (GFP+) Normalized to Non-Targeting #3 per condition	1	0.138016	3
2	c	Donor G	n/a	NT #4	Fold Change in HIV-1 Infected Cells (GFP+) Normalized to Non-Targeting #3 per condition	0.963608	0.0624017	3
2	c	Donor G	n/a	CPSF6 #5	Fold Change in HIV-1 Infected Cells (GFP+) Normalized to Non-Targeting #3 per condition	2.25345	0.19341	3
2	c	Donor G	n/a	CPSF6 #6	Fold Change in HIV-1 Infected Cells (GFP+) Normalized to Non-Targeting #3 per condition	4.22371	0.19093	3
2	c	Donor G	n/a	TRIM5α #6	Fold Change in HIV-1 Infected Cells (GFP+) Normalized to Non-Targeting #3 per condition	1.02074	0.103565	3
2	c	Donor G	n/a	TRIM5α #7	Fold Change in HIV-1 Infected Cells (GFP+) Normalized to Non-Targeting #3 per condition	1.11016	0.0354968	3
Significance Tests
Figure	Panel	Sample	Treatment	Test	Comparison	Mean 1	Mean 2	Mean Diff.	SE of diff.	n1	n2	q	DF	Mean Diff.	95.00% CI of diff.	Below threshold? (Alpha = 0.05)	Summary	Adjusted P Value
2	c	Day 5 Donor E	n/a	One-way ANOVA with Dunnett's multiple comparison's test	NT #3 vs CPSF6 #5	1	2.575	-1.575	0.1899	3	3	8.291	12	-1.575	-2.126 to -1.024	Yes	****	1.14847e-05
2	c	Day 5 Donor E	n/a	One-way ANOVA with Dunnett's multiple comparison's test	NT #3 vs CPSF6 #6	1	3.981	-2.981	0.1899	3	3	15.7	12	-2.981	-3.533 to -2.430	Yes	****	1.04e-08
2	c	Day 5 Donor E	n/a	One-way ANOVA with Dunnett's multiple comparison's test	NT #3 vs TRIM5α #6	1	1.193	-0.1933	0.1899	3	3	1.017	12	-0.1933	-0.7444 to 0.3578	No	ns	0.763926
2	c	Day 5 Donor E	n/a	One-way ANOVA with Dunnett's multiple comparison's test	NT #3 vs TRIM5α #7	1	1.044	-0.04412	0.1899	3	3	0.2323	12	-0.04412	-0.5952 to 0.5070	No	ns	0.999397
2	c	Day 5 Donor F	n/a	One-way ANOVA with Dunnett's multiple comparison's test	NT #3 vs CPSF6 #5	1	1.14	-0.1397	0.1423	3	3	0.9817	12	-0.1397	-0.5527 to 0.2732	No	ns	0.785774
2	c	Day 5 Donor F	n/a	One-way ANOVA with Dunnett's multiple comparison's test	NT #3 vs CPSF6 #6	1	1.723	-0.7228	0.1423	3	3	5.078	12	-0.7228	-1.136 to -0.3098	Yes	**	0.00114818
2	c	Day 5 Donor F	n/a	One-way ANOVA with Dunnett's multiple comparison's test	NT #3 vs TRIM5α #6	1	0.9917	0.008347	0.1423	3	3	0.05865	12	0.008347	-0.4046 to 0.4213	No	ns	0.999999
2	c	Day 5 Donor F	n/a	One-way ANOVA with Dunnett's multiple comparison's test	NT #3 vs TRIM5α #7	1	1.018	-0.01844	0.1423	3	3	0.1296	12	-0.01844	-0.4314 to 0.3945	No	ns	0.999965
2	c	Day 5 Donor G	n/a	One-way ANOVA with Dunnett's multiple comparison's test	NT #3 vs CPSF6 #5	1	2.253	-1.253	0.1099	3	3	11.4	12	-1.253	-1.572 to -0.9345	Yes	****	3.815e-07
2	c	Day 5 Donor G	n/a	One-way ANOVA with Dunnett's multiple comparison's test	NT #3 vs CPSF6 #6	1	4.224	-3.224	0.1099	3	3	29.32	12	-3.224	-3.543 to -2.905	Yes	****	<0.0000000001
2	c	Day 5 Donor G	n/a	One-way ANOVA with Dunnett's multiple comparison's test	NT #3 vs TRIM5α #6	1	1.021	-0.02074	0.1099	3	3	0.1886	12	-0.02074	-0.3397 to 0.2982	No	ns	0.999779
2	c	Day 5 Donor G	n/a	One-way ANOVA with Dunnett's multiple comparison's test	NT #3 vs TRIM5α #7	1	1.11	-0.1102	0.1099	3	3	1.002	12	-0.1102	-0.4291 to 0.2088	No	ns	0.773468

## Sheet: Fig. 3 Statistics
Row Statistics
Figure	Panel	Sample	Treatment	Guide RNA	Readout	Mean	SD	N
3	a	Donor K	Media Only	NT #4	Percent HIV-1 Infected Cells (GFP+)	1.70915	0.0484115	3
3	a	Donor K	Media Only	CXCR4	Percent HIV-1 Infected Cells (GFP+)	0	0	3
3	a	Donor K	Media Only	CYPA #3	Percent HIV-1 Infected Cells (GFP+)	0.104541	0.00741093	3
3	a	Donor K	Media Only	IFNAR1	Percent HIV-1 Infected Cells (GFP+)	3.31376	0.254506	3
3	a	Donor K	Media Only	CPSF6 #5	Percent HIV-1 Infected Cells (GFP+)	7.01647	0.496305	3
3	a	Donor K	Media Only	CPSF6 #6	Percent HIV-1 Infected Cells (GFP+)	9.46947	0.807993	3
3	a	Donor K	IFNα	NT #4	Percent HIV-1 Infected Cells (GFP+)	0.052561	0.00252337	3
3	a	Donor K	IFNα	CXCR4	Percent HIV-1 Infected Cells (GFP+)	0.000602333	0.00104327	3
3	a	Donor K	IFNα	CYPA #3	Percent HIV-1 Infected Cells (GFP+)	0.00978067	0.0100474	3
3	a	Donor K	IFNα	IFNAR1	Percent HIV-1 Infected Cells (GFP+)	3.19595	0.488542	3
3	a	Donor K	IFNα	CPSF6 #5	Percent HIV-1 Infected Cells (GFP+)	0.533876	0.0193992	3
3	a	Donor K	IFNα	CPSF6 #6	Percent HIV-1 Infected Cells (GFP+)	1.11085	0.0803675	3
3	a	Donor K	IFNβ	NT #4	Percent HIV-1 Infected Cells (GFP+)	0.124925	0.00649652	3
3	a	Donor K	IFNβ	CXCR4	Percent HIV-1 Infected Cells (GFP+)	0.000633667	0.00109754	3
3	a	Donor K	IFNβ	CYPA #3	Percent HIV-1 Infected Cells (GFP+)	0.013102	0.0162883	3
3	a	Donor K	IFNβ	IFNAR1	Percent HIV-1 Infected Cells (GFP+)	3.49241	0.371875	3
3	a	Donor K	IFNβ	CPSF6 #5	Percent HIV-1 Infected Cells (GFP+)	1.68857	0.278653	3
3	a	Donor K	IFNβ	CPSF6 #6	Percent HIV-1 Infected Cells (GFP+)	2.32559	0.391835	3
3	a	Donor K	Universal Type I IFN	NT #4	Percent HIV-1 Infected Cells (GFP+)	0.042614	0.0155665	3
3	a	Donor K	Universal Type I IFN	CXCR4	Percent HIV-1 Infected Cells (GFP+)	0.00225	0.00102162	3
3	a	Donor K	Universal Type I IFN	CYPA #3	Percent HIV-1 Infected Cells (GFP+)	0.00694467	0.00195806	3
3	a	Donor K	Universal Type I IFN	IFNAR1	Percent HIV-1 Infected Cells (GFP+)	2.77397	0.128401	3
3	a	Donor K	Universal Type I IFN	CPSF6 #5	Percent HIV-1 Infected Cells (GFP+)	0.288554	0.0432076	3
3	a	Donor K	Universal Type I IFN	CPSF6 #6	Percent HIV-1 Infected Cells (GFP+)	0.499694	0.0345917	3
3	a	Donor K	IFNγ	NT #4	Percent HIV-1 Infected Cells (GFP+)	1.69109	0.265384	3
3	a	Donor K	IFNγ	CXCR4	Percent HIV-1 Infected Cells (GFP+)	0.002601	0.00309018	3
3	a	Donor K	IFNγ	CYPA #3	Percent HIV-1 Infected Cells (GFP+)	0.0942263	0.0121149	3
3	a	Donor K	IFNγ	IFNAR1	Percent HIV-1 Infected Cells (GFP+)	3.61707	0.148448	3
3	a	Donor K	IFNγ	CPSF6 #5	Percent HIV-1 Infected Cells (GFP+)	6.60756	1.24147	3
3	a	Donor K	IFNγ	CPSF6 #6	Percent HIV-1 Infected Cells (GFP+)	8.01492	1.37439	2	(One technical replicate ommitted due to sample loss during flow cytometry)
3	a	Donor L	Media Only	NT #4	Percent HIV-1 Infected Cells (GFP+)	2.05604	0.557758	3
3	a	Donor L	Media Only	CXCR4	Percent HIV-1 Infected Cells (GFP+)	0.00336333	0.00150368	3
3	a	Donor L	Media Only	CYPA #3	Percent HIV-1 Infected Cells (GFP+)	0.239282	0.0713539	3
3	a	Donor L	Media Only	IFNAR1	Percent HIV-1 Infected Cells (GFP+)	3.74249	0.385925	3
3	a	Donor L	Media Only	CPSF6 #5	Percent HIV-1 Infected Cells (GFP+)	9.51401	2.24867	3
3	a	Donor L	Media Only	CPSF6 #6	Percent HIV-1 Infected Cells (GFP+)	8.17233	1.24563	3
3	a	Donor L	IFNα	NT #4	Percent HIV-1 Infected Cells (GFP+)	0.0821913	0.0132391	3
3	a	Donor L	IFNα	CXCR4	Percent HIV-1 Infected Cells (GFP+)	0	0	3
3	a	Donor L	IFNα	CYPA #3	Percent HIV-1 Infected Cells (GFP+)	0.00463567	0.00196461	3
3	a	Donor L	IFNα	IFNAR1	Percent HIV-1 Infected Cells (GFP+)	4.62312	0.648443	3
3	a	Donor L	IFNα	CPSF6 #5	Percent HIV-1 Infected Cells (GFP+)	1.2129	0.331212	3
3	a	Donor L	IFNα	CPSF6 #6	Percent HIV-1 Infected Cells (GFP+)	0.965099	0.274407	3
3	a	Donor L	IFNβ	NT #4	Percent HIV-1 Infected Cells (GFP+)	0.093909	0.0105744	3
3	a	Donor L	IFNβ	CXCR4	Percent HIV-1 Infected Cells (GFP+)	0.00429333	0.00392583	3
3	a	Donor L	IFNβ	CYPA #3	Percent HIV-1 Infected Cells (GFP+)	0.011173	0.00203437	3
3	a	Donor L	IFNβ	IFNAR1	Percent HIV-1 Infected Cells (GFP+)	3.65079	0.520976	3
3	a	Donor L	IFNβ	CPSF6 #5	Percent HIV-1 Infected Cells (GFP+)	2.89534	0.552321	3
3	a	Donor L	IFNβ	CPSF6 #6	Percent HIV-1 Infected Cells (GFP+)	2.39442	0.25128	3
3	a	Donor L	Universal Type I IFN	NT #4	Percent HIV-1 Infected Cells (GFP+)	0.0367933	0.0106005	3
3	a	Donor L	Universal Type I IFN	CXCR4	Percent HIV-1 Infected Cells (GFP+)	0.00153033	0.00265062	3
3	a	Donor L	Universal Type I IFN	CYPA #3	Percent HIV-1 Infected Cells (GFP+)	0.00501733	0.00144558	3
3	a	Donor L	Universal Type I IFN	IFNAR1	Percent HIV-1 Infected Cells (GFP+)	3.39721	0.616566	3
3	a	Donor L	Universal Type I IFN	CPSF6 #5	Percent HIV-1 Infected Cells (GFP+)	0.73019	0.158312	3
3	a	Donor L	Universal Type I IFN	CPSF6 #6	Percent HIV-1 Infected Cells (GFP+)	0.370972	0.132926	3
3	a	Donor L	IFNγ	NT #4	Percent HIV-1 Infected Cells (GFP+)	1.12642	0.581533	3
3	a	Donor L	IFNγ	CXCR4	Percent HIV-1 Infected Cells (GFP+)	0.00468333	0.00443534	3
3	a	Donor L	IFNγ	CYPA #3	Percent HIV-1 Infected Cells (GFP+)	0.121628	0.0440147	3
3	a	Donor L	IFNγ	IFNAR1	Percent HIV-1 Infected Cells (GFP+)	3.45088	0.291006	3
3	a	Donor L	IFNγ	CPSF6 #5	Percent HIV-1 Infected Cells (GFP+)	8.47358	0.548567	3
3	a	Donor L	IFNγ	CPSF6 #6	Percent HIV-1 Infected Cells (GFP+)	8.13107	0.791912	3
3	d	Donor M	P90A Capsid Mutant	NT #4	Fold Change in HIV-1 Infected Cells (GFP+) Normalized to Non-Targeting per condition	1	0.1375	3
3	d	Donor M	P90A Capsid Mutant	CYPA #3	Fold Change in HIV-1 Infected Cells (GFP+) Normalized to Non-Targeting per condition	0.568496	0.144485	3
3	d	Donor M	P90A Capsid Mutant	CPSF6 #5	Fold Change in HIV-1 Infected Cells (GFP+) Normalized to Non-Targeting per condition	16.1237	6.06709	3
3	d	Donor M	P90A Capsid Mutant	CPSF6 #6	Fold Change in HIV-1 Infected Cells (GFP+) Normalized to Non-Targeting per condition	8.08341	1.11701	3
3	d	Donor M	P90A Capsid Mutant	TRIM5α #6	Fold Change in HIV-1 Infected Cells (GFP+) Normalized to Non-Targeting per condition	7.85392	0.780389	3
3	d	Donor M	P90A Capsid Mutant	TRIM5α #7	Fold Change in HIV-1 Infected Cells (GFP+) Normalized to Non-Targeting per condition	26.9187	1.72387	3
3	d	Donor N	P90A Capsid Mutant	NT #4	Fold Change in HIV-1 Infected Cells (GFP+) Normalized to Non-Targeting per condition	1	0.387152	3
3	d	Donor N	P90A Capsid Mutant	CYPA #3	Fold Change in HIV-1 Infected Cells (GFP+) Normalized to Non-Targeting per condition	0.569549	0.144298	3
3	d	Donor N	P90A Capsid Mutant	CPSF6 #5	Fold Change in HIV-1 Infected Cells (GFP+) Normalized to Non-Targeting per condition	12.2565	2.4094	3
3	d	Donor N	P90A Capsid Mutant	CPSF6 #6	Fold Change in HIV-1 Infected Cells (GFP+) Normalized to Non-Targeting per condition	8.888	1.68659	3
3	d	Donor N	P90A Capsid Mutant	TRIM5α #6	Fold Change in HIV-1 Infected Cells (GFP+) Normalized to Non-Targeting per condition	9.0299	2.45856	3
3	d	Donor N	P90A Capsid Mutant	TRIM5α #7	Fold Change in HIV-1 Infected Cells (GFP+) Normalized to Non-Targeting per condition	17.6055	1.28244	3
3	d	Donor O	P90A Capsid Mutant	NT #4	Fold Change in HIV-1 Infected Cells (GFP+) Normalized to Non-Targeting per condition	1	0.301731	3
3	d	Donor O	P90A Capsid Mutant	CYPA #3	Fold Change in HIV-1 Infected Cells (GFP+) Normalized to Non-Targeting per condition	0.43838	0.0965046	3
3	d	Donor O	P90A Capsid Mutant	CPSF6 #5	Fold Change in HIV-1 Infected Cells (GFP+) Normalized to Non-Targeting per condition	12.5665	2.53565	3
3	d	Donor O	P90A Capsid Mutant	CPSF6 #6	Fold Change in HIV-1 Infected Cells (GFP+) Normalized to Non-Targeting per condition	10.8386	0.881661	3
3	d	Donor O	P90A Capsid Mutant	TRIM5α #6	Fold Change in HIV-1 Infected Cells (GFP+) Normalized to Non-Targeting per condition	9.41305	1.4398	3
3	d	Donor O	P90A Capsid Mutant	TRIM5α #7	Fold Change in HIV-1 Infected Cells (GFP+) Normalized to Non-Targeting per condition	30.6317	3.0095	3
3	d	Donor P	P90A Capsid Mutant	NT #4	Fold Change in HIV-1 Infected Cells (GFP+) Normalized to Non-Targeting per condition	1	0.129363	3
3	d	Donor P	P90A Capsid Mutant	CYPA #3	Fold Change in HIV-1 Infected Cells (GFP+) Normalized to Non-Targeting per condition	0.429391	0.254105	3
3	d	Donor P	P90A Capsid Mutant	CPSF6 #5	Fold Change in HIV-1 Infected Cells (GFP+) Normalized to Non-Targeting per condition	23.4127	8.39232	3
3	d	Donor P	P90A Capsid Mutant	CPSF6 #6	Fold Change in HIV-1 Infected Cells (GFP+) Normalized to Non-Targeting per condition	8.38492	3.91369	3
3	d	Donor P	P90A Capsid Mutant	TRIM5α #6	Fold Change in HIV-1 Infected Cells (GFP+) Normalized to Non-Targeting per condition	7.60275	0.791063	3
3	d	Donor P	P90A Capsid Mutant	TRIM5α #7	Fold Change in HIV-1 Infected Cells (GFP+) Normalized to Non-Targeting per condition	31.5351	0.484175	3
3	d	Donor Q	P90A Capsid Mutant	NT #4	Fold Change in HIV-1 Infected Cells (GFP+) Normalized to Non-Targeting per condition	1	0.314964	3
3	d	Donor Q	P90A Capsid Mutant	CYPA #3	Fold Change in HIV-1 Infected Cells (GFP+) Normalized to Non-Targeting per condition	0.426572	0.0873876	3
3	d	Donor Q	P90A Capsid Mutant	CPSF6 #5	Fold Change in HIV-1 Infected Cells (GFP+) Normalized to Non-Targeting per condition	27.4883	11.665	3
3	d	Donor Q	P90A Capsid Mutant	CPSF6 #6	Fold Change in HIV-1 Infected Cells (GFP+) Normalized to Non-Targeting per condition	8.90918	3.27667	3
3	d	Donor Q	P90A Capsid Mutant	TRIM5α #6	Fold Change in HIV-1 Infected Cells (GFP+) Normalized to Non-Targeting per condition	12.8795	0.942295	3
3	d	Donor Q	P90A Capsid Mutant	TRIM5α #7	Fold Change in HIV-1 Infected Cells (GFP+) Normalized to Non-Targeting per condition	37.0348	5.98824	3
3	e	Donor O	DMSO	NT	Fold Change in HIV-1 Infected Cells (GFP+) Normalized to Non-Targeting per condition	1	0.0448455	3
3	e	Donor O	DMSO	CXCR4	Fold Change in HIV-1 Infected Cells (GFP+) Normalized to Non-Targeting per condition	0.0798027	0.0200163	3
3	e	Donor O	DMSO	CYPA #3	Fold Change in HIV-1 Infected Cells (GFP+) Normalized to Non-Targeting per condition	0.615403	0.0572618	3
3	e	Donor O	DMSO	CPSF6 #5	Fold Change in HIV-1 Infected Cells (GFP+) Normalized to Non-Targeting per condition	2.1403	0.171502	3
3	e	Donor O	DMSO	CPSF6 #6	Fold Change in HIV-1 Infected Cells (GFP+) Normalized to Non-Targeting per condition	1.8838	0.18549	3
3	e	Donor O	DMSO	TRIM5α #6	Fold Change in HIV-1 Infected Cells (GFP+) Normalized to Non-Targeting per condition	1.14647	0.0485371	3
3	e	Donor O	DMSO	TRIM5α #7	Fold Change in HIV-1 Infected Cells (GFP+) Normalized to Non-Targeting per condition	1.1619	0.0354579	3
3	e	Donor O	Cyclosporin A	NT	Fold Change in HIV-1 Infected Cells (GFP+) Normalized to Non-Targeting per condition	1	0.106931	3
3	e	Donor O	Cyclosporin A	CXCR4	Fold Change in HIV-1 Infected Cells (GFP+) Normalized to Non-Targeting per condition	0.151029	0.0609024	3
3	e	Donor O	Cyclosporin A	CYPA #3	Fold Change in HIV-1 Infected Cells (GFP+) Normalized to Non-Targeting per condition	1.07548	0.0658188	3
3	e	Donor O	Cyclosporin A	CPSF6 #5	Fold Change in HIV-1 Infected Cells (GFP+) Normalized to Non-Targeting per condition	4.44047	0.866025	3
3	e	Donor O	Cyclosporin A	CPSF6 #6	Fold Change in HIV-1 Infected Cells (GFP+) Normalized to Non-Targeting per condition	3.73007	0.316548	3
3	e	Donor O	Cyclosporin A	TRIM5α #6	Fold Change in HIV-1 Infected Cells (GFP+) Normalized to Non-Targeting per condition	8.81175	0.299192	3
3	e	Donor O	Cyclosporin A	TRIM5α #7	Fold Change in HIV-1 Infected Cells (GFP+) Normalized to Non-Targeting per condition	19.683	0.456346	3
3	e	Donor P	DMSO	NT	Fold Change in HIV-1 Infected Cells (GFP+) Normalized to Non-Targeting per condition	1	0.0674451	3
3	e	Donor P	DMSO	CXCR4	Fold Change in HIV-1 Infected Cells (GFP+) Normalized to Non-Targeting per condition	0.0412151	0.00208039	3
3	e	Donor P	DMSO	CYPA #3	Fold Change in HIV-1 Infected Cells (GFP+) Normalized to Non-Targeting per condition	0.474645	0.0986305	3
3	e	Donor P	DMSO	CPSF6 #5	Fold Change in HIV-1 Infected Cells (GFP+) Normalized to Non-Targeting per condition	1.72589	0.189839	3
3	e	Donor P	DMSO	CPSF6 #6	Fold Change in HIV-1 Infected Cells (GFP+) Normalized to Non-Targeting per condition	1.67616	0.183657	3
3	e	Donor P	DMSO	TRIM5α #6	Fold Change in HIV-1 Infected Cells (GFP+) Normalized to Non-Targeting per condition	1.12057	0.267372	3
3	e	Donor P	DMSO	TRIM5α #7	Fold Change in HIV-1 Infected Cells (GFP+) Normalized to Non-Targeting per condition	1.00358	0.183983	3
3	e	Donor P	Cyclosporin A	NT	Fold Change in HIV-1 Infected Cells (GFP+) Normalized to Non-Targeting per condition	1	0.128606	3
3	e	Donor P	Cyclosporin A	CXCR4	Fold Change in HIV-1 Infected Cells (GFP+) Normalized to Non-Targeting per condition	0.0905987	0.0230192	3
3	e	Donor P	Cyclosporin A	CYPA #3	Fold Change in HIV-1 Infected Cells (GFP+) Normalized to Non-Targeting per condition	1.38259	0.257085	3
3	e	Donor P	Cyclosporin A	CPSF6 #5	Fold Change in HIV-1 Infected Cells (GFP+) Normalized to Non-Targeting per condition	5.99196	0.450204	3
3	e	Donor P	Cyclosporin A	CPSF6 #6	Fold Change in HIV-1 Infected Cells (GFP+) Normalized to Non-Targeting per condition	4.21905	0.316097	3
3	e	Donor P	Cyclosporin A	TRIM5α #6	Fold Change in HIV-1 Infected Cells (GFP+) Normalized to Non-Targeting per condition	11.9259	1.65062	3
3	e	Donor P	Cyclosporin A	TRIM5α #7	Fold Change in HIV-1 Infected Cells (GFP+) Normalized to Non-Targeting per condition	17.2312	1.9682	3
3	e	Donor Q	DMSO	NT	Fold Change in HIV-1 Infected Cells (GFP+) Normalized to Non-Targeting per condition	1	0.0321035	3
3	e	Donor Q	DMSO	CXCR4	Fold Change in HIV-1 Infected Cells (GFP+) Normalized to Non-Targeting per condition	0.0585399	0.0122522	3
3	e	Donor Q	DMSO	CYPA #3	Fold Change in HIV-1 Infected Cells (GFP+) Normalized to Non-Targeting per condition	0.59076	0.0420652	3
3	e	Donor Q	DMSO	CPSF6 #5	Fold Change in HIV-1 Infected Cells (GFP+) Normalized to Non-Targeting per condition	1.58882	0.115773	3
3	e	Donor Q	DMSO	CPSF6 #6	Fold Change in HIV-1 Infected Cells (GFP+) Normalized to Non-Targeting per condition	1.36119	0.0491852	3
3	e	Donor Q	DMSO	TRIM5α #6	Fold Change in HIV-1 Infected Cells (GFP+) Normalized to Non-Targeting per condition	1.08092	0.0609302	3
3	e	Donor Q	DMSO	TRIM5α #7	Fold Change in HIV-1 Infected Cells (GFP+) Normalized to Non-Targeting per condition	1.13016	0.0942861	3
3	e	Donor Q	Cyclosporin A	NT	Fold Change in HIV-1 Infected Cells (GFP+) Normalized to Non-Targeting per condition	1	0.112755	3
3	e	Donor Q	Cyclosporin A	CXCR4	Fold Change in HIV-1 Infected Cells (GFP+) Normalized to Non-Targeting per condition	0.113738	0.0456117	3
3	e	Donor Q	Cyclosporin A	CYPA #3	Fold Change in HIV-1 Infected Cells (GFP+) Normalized to Non-Targeting per condition	1.72797	0.197495	3
3	e	Donor Q	Cyclosporin A	CPSF6 #5	Fold Change in HIV-1 Infected Cells (GFP+) Normalized to Non-Targeting per condition	7.56785	0.307578	3
3	e	Donor Q	Cyclosporin A	CPSF6 #6	Fold Change in HIV-1 Infected Cells (GFP+) Normalized to Non-Targeting per condition	5.69274	0.539367	3
3	e	Donor Q	Cyclosporin A	TRIM5α #6	Fold Change in HIV-1 Infected Cells (GFP+) Normalized to Non-Targeting per condition	16.2145	1.12412	3
3	e	Donor Q	Cyclosporin A	TRIM5α #7	Fold Change in HIV-1 Infected Cells (GFP+) Normalized to Non-Targeting per condition	37.3682	2.61002	3
Significance Tests
Figure	Panel	Sample	Treatment	Test	Comparison	Mean 1	Mean 2	Mean Diff.	SE of diff.	n1	n2	q	DF	Mean Diff.	95.00% CI of diff.	Below threshold? (Alpha = 0.05)	Summary	Adjusted P Value
3	a	Donor K	Media Only	One-way ANOVA with Dunnett's multiple comparison's test	NT #4 vs. IFNAR1	1.709	3.314	-1.605	0.3277	3	3	4.897	12	-1.605	-2.555 to -0.6539	Yes	**	0.00154784
3	a	Donor K	Media Only	One-way ANOVA with Dunnett's multiple comparison's test	NT #4 vs. CPSF6 #5	1.709	7.016	-5.307	0.3277	3	3	16.2	12	-5.307	-6.258 to -4.357	Yes	****	7.2e-09
3	a	Donor K	Media Only	One-way ANOVA with Dunnett's multiple comparison's test	NT #4 vs. CPSF6 #6	1.709	9.469	-7.76	0.3277	3	3	23.68	12	-7.76	-8.711 to -6.810	Yes	****	<0.0000000001
3	a	Donor K	IFNα	One-way ANOVA with Dunnett's multiple comparison's test	NT #4 vs. IFNAR1	0.05256	3.196	-3.143	0.1652	3	3	19.03	12	-3.143	-3.623 to -2.664	Yes	****	1.1e-09
3	a	Donor K	IFNα	One-way ANOVA with Dunnett's multiple comparison's test	NT #4 vs. CPSF6 #5	0.05256	0.5339	-0.4813	0.1652	3	3	2.914	12	-0.4813	-0.9606 to -0.002020	Yes	*	0.0489335
3	a	Donor K	IFNα	One-way ANOVA with Dunnett's multiple comparison's test	NT #4 vs. CPSF6 #6	0.05256	1.111	-1.058	0.1652	3	3	6.406	12	-1.058	-1.538 to -0.5790	Yes	***	0.000146183
3	a	Donor K	IFNβ	One-way ANOVA with Dunnett's multiple comparison's test	NT #4 vs. IFNAR1	0.1249	3.492	-3.367	0.2027	3	3	16.61	12	-3.367	-3.956 to -2.779	Yes	****	5.4e-09
3	a	Donor K	IFNβ	One-way ANOVA with Dunnett's multiple comparison's test	NT #4 vs. CPSF6 #5	0.1249	1.689	-1.564	0.2027	3	3	7.714	12	-1.564	-2.152 to -0.9756	Yes	****	2.39334e-05
3	a	Donor K	IFNβ	One-way ANOVA with Dunnett's multiple comparison's test	NT #4 vs. CPSF6 #6	0.1249	2.326	-2.201	0.2027	3	3	10.86	12	-2.201	-2.789 to -1.613	Yes	****	6.528e-07
3	a	Donor K	Universal Type I IFN	One-way ANOVA with Dunnett's multiple comparison's test	NT #4 vs. IFNAR1	0.04261	2.774	-2.731	0.0469	3	3	58.24	12	-2.731	-2.867 to -2.595	Yes	****	<0.0000000001
3	a	Donor K	Universal Type I IFN	One-way ANOVA with Dunnett's multiple comparison's test	NT #4 vs. CPSF6 #5	0.04261	0.2886	-0.2459	0.0469	3	3	5.244	12	-0.2459	-0.3820 to -0.1099	Yes	***	0.000876805
3	a	Donor K	Universal Type I IFN	One-way ANOVA with Dunnett's multiple comparison's test	NT #4 vs. CPSF6 #6	0.04261	0.4997	-0.4571	0.0469	3	3	9.746	12	-0.4571	-0.5932 to -0.3210	Yes	****	2.1015e-06
3	a	Donor K	IFNγ	One-way ANOVA with Dunnett's multiple comparison's test	NT #4 vs. IFNAR1	1.691	3.617	-1.926	0.559	3	3	3.445	11	-1.926	-3.575 to -0.2768	Yes	*	0.0215587
3	a	Donor K	IFNγ	One-way ANOVA with Dunnett's multiple comparison's test	NT #4 vs. CPSF6 #5	1.691	6.608	-4.916	0.559	3	3	8.794	11	-4.916	-6.566 to -3.267	Yes	****	1.15416e-05
3	a	Donor K	IFNγ	One-way ANOVA with Dunnett's multiple comparison's test	NT #4 vs. CPSF6 #6	1.691	8.015	-6.324	0.625	3	2	10.12	11	-6.324	-8.168 to -4.480	Yes	****	2.9059e-06
3	a	Donor L	Media Only	One-way ANOVA with Dunnett's multiple comparison's test	NT #4 vs. IFNAR1	2.056	3.742	-1.686	0.8865	3	3	1.902	12	-1.686	-4.259 to 0.8856	No	ns	0.261843
3	a	Donor L	Media Only	One-way ANOVA with Dunnett's multiple comparison's test	NT #4 vs. CPSF6 #5	2.056	9.514	-7.458	0.8865	3	3	8.413	12	-7.458	-10.03 to -4.886	Yes	****	9.8848e-06
3	a	Donor L	Media Only	One-way ANOVA with Dunnett's multiple comparison's test	NT #4 vs. CPSF6 #6	2.056	8.172	-6.116	0.8865	3	3	6.899	12	-6.116	-8.688 to -3.544	Yes	****	7.2089e-05
3	a	Donor L	IFNα	One-way ANOVA with Dunnett's multiple comparison's test	NT #4 vs. IFNAR1	0.08219	4.623	-4.541	0.2594	3	3	17.5	12	-4.541	-5.294 to -3.788	Yes	****	3e-09
3	a	Donor L	IFNα	One-way ANOVA with Dunnett's multiple comparison's test	NT #4 vs. CPSF6 #5	0.08219	1.213	-1.131	0.2594	3	3	4.359	12	-1.131	-1.883 to -0.3781	Yes	**	0.00384573
3	a	Donor L	IFNα	One-way ANOVA with Dunnett's multiple comparison's test	NT #4 vs. CPSF6 #6	0.08219	0.9651	-0.8829	0.2594	3	3	3.403	12	-0.8829	-1.636 to -0.1303	Yes	*	0.0205653
3	a	Donor L	IFNβ	One-way ANOVA with Dunnett's multiple comparison's test	NT #4 vs. IFNAR1	0.09391	3.651	-3.557	0.2666	3	3	13.34	12	-3.557	-4.330 to -2.783	Yes	****	6.61e-08
3	a	Donor L	IFNβ	One-way ANOVA with Dunnett's multiple comparison's test	NT #4 vs. CPSF6 #5	0.09391	2.895	-2.801	0.2666	3	3	10.51	12	-2.801	-3.575 to -2.028	Yes	****	9.326e-07
3	a	Donor L	IFNβ	One-way ANOVA with Dunnett's multiple comparison's test	NT #4 vs. CPSF6 #6	0.09391	2.394	-2.301	0.2666	3	3	8.629	12	-2.301	-3.074 to -1.527	Yes	****	7.6005e-06
3	a	Donor L	Universal Type I IFN	One-way ANOVA with Dunnett's multiple comparison's test	NT #4 vs. IFNAR1	0.03679	3.397	-3.36	0.2168	3	3	15.5	12	-3.36	-3.989 to -2.731	Yes	****	1.2e-08
3	a	Donor L	Universal Type I IFN	One-way ANOVA with Dunnett's multiple comparison's test	NT #4 vs. CPSF6 #5	0.03679	0.7302	-0.6934	0.2168	3	3	3.198	12	-0.6934	-1.322 to -0.06440	Yes	*	0.0295951
3	a	Donor L	Universal Type I IFN	One-way ANOVA with Dunnett's multiple comparison's test	NT #4 vs. CPSF6 #6	0.03679	0.371	-0.3342	0.2168	3	3	1.541	12	-0.3342	-0.9632 to 0.2948	No	ns	0.434828
3	a	Donor L	IFNγ	One-way ANOVA with Dunnett's multiple comparison's test	NT #4 vs. IFNAR1	1.126	3.451	-2.324	0.3877	3	3	5.995	12	-2.324	-3.449 to -1.200	Yes	***	0.00026981
3	a	Donor L	IFNγ	One-way ANOVA with Dunnett's multiple comparison's test	NT #4 vs. CPSF6 #5	1.126	8.474	-7.347	0.3877	3	3	18.95	12	-7.347	-8.472 to -6.222	Yes	****	1.2e-09
3	a	Donor L	IFNγ	One-way ANOVA with Dunnett's multiple comparison's test	NT #4 vs. CPSF6 #6	1.126	8.131	-7.005	0.3877	3	3	18.07	12	-7.005	-8.130 to -5.880	Yes	****	2.1e-09
3	e	Donor M	P90A Capsid Mutant	One-way ANOVA with Dunnett's multiple comparison's test	NT vs. CPSF6 #5	1	16.12	-15.12	2.152	3	3	7.028	12	-15.12	-21.37 to -8.880	Yes	****	6.02453e-05
3	d	Donor M	P90A Capsid Mutant	One-way ANOVA with Dunnett's multiple comparison's test	NT vs. CPSF6 #6	1	8.083	-7.083	2.152	3	3	3.292	12	-7.083	-13.33 to -0.8399	Yes	*	0.0250827
3	d	Donor M	P90A Capsid Mutant	One-way ANOVA with Dunnett's multiple comparison's test	NT vs. TRIM5α #6	1	7.854	-6.854	2.152	3	3	3.185	12	-6.854	-13.10 to -0.6105	Yes	*	0.0303056
3	d	Donor M	P90A Capsid Mutant	One-way ANOVA with Dunnett's multiple comparison's test	NT vs. TRIM5α #7	1	26.92	-25.92	2.152	3	3	12.04	12	-25.92	-32.16 to -19.68	Yes	****	2.077e-07
3	d	Donor N	P90A Capsid Mutant	One-way ANOVA with Dunnett's multiple comparison's test	NT vs. CPSF6 #5	1	12.26	-11.26	1.354	3	3	8.311	12	-11.26	-15.19 to -7.327	Yes	****	1.1205e-05
3	d	Donor N	P90A Capsid Mutant	One-way ANOVA with Dunnett's multiple comparison's test	NT vs. CPSF6 #6	1	8.888	-7.888	1.354	3	3	5.824	12	-7.888	-11.82 to -3.958	Yes	***	0.000350714
3	d	Donor N	P90A Capsid Mutant	One-way ANOVA with Dunnett's multiple comparison's test	NT vs. TRIM5α #6	1	9.03	-8.03	1.354	3	3	5.929	12	-8.03	-11.96 to -4.100	Yes	***	0.000298631
3	d	Donor N	P90A Capsid Mutant	One-way ANOVA with Dunnett's multiple comparison's test	NT vs. TRIM5α #7	1	17.61	-16.61	1.354	3	3	12.26	12	-16.61	-20.54 to -12.68	Yes	****	1.704e-07
3	d	Donor O	P90A Capsid Mutant	One-way ANOVA with Dunnett's multiple comparison's test	NT vs. CPSF6 #5	1	12.57	-11.57	1.431	3	3	8.081	12	-11.57	-15.72 to -7.414	Yes	****	1.4938e-05
3	d	Donor O	P90A Capsid Mutant	One-way ANOVA with Dunnett's multiple comparison's test	NT vs. CPSF6 #6	1	10.84	-9.839	1.431	3	3	6.874	12	-9.839	-13.99 to -5.686	Yes	****	7.46926e-05
3	d	Donor O	P90A Capsid Mutant	One-way ANOVA with Dunnett's multiple comparison's test	NT vs. TRIM5α #6	1	9.413	-8.413	1.431	3	3	5.878	12	-8.413	-12.57 to -4.260	Yes	***	0.000322773
3	d	Donor O	P90A Capsid Mutant	One-way ANOVA with Dunnett's multiple comparison's test	NT vs. TRIM5α #7	1	30.63	-29.63	1.431	3	3	20.7	12	-29.63	-33.78 to -25.48	Yes	****	4e-10
3	d	Donor P	P90A Capsid Mutant	One-way ANOVA with Dunnett's multiple comparison's test	NT vs. CPSF6 #5	1	23.41	-22.41	3.104	3	3	7.222	12	-22.41	-31.42 to -13.41	Yes	****	4.61629e-05
3	d	Donor P	P90A Capsid Mutant	One-way ANOVA with Dunnett's multiple comparison's test	NT vs. CPSF6 #6	1	8.385	-7.385	3.104	3	3	2.379	12	-7.385	-16.39 to 1.620	No	ns	0.122488
3	d	Donor P	P90A Capsid Mutant	One-way ANOVA with Dunnett's multiple comparison's test	NT vs. TRIM5α #6	1	7.603	-6.603	3.104	3	3	2.127	12	-6.603	-15.61 to 2.402	No	ns	0.184777
3	d	Donor P	P90A Capsid Mutant	One-way ANOVA with Dunnett's multiple comparison's test	NT vs. TRIM5α #7	1	31.54	-30.54	3.104	3	3	9.839	12	-30.54	-39.54 to -21.53	Yes	****	1.8978e-06
3	d	Donor Q	P90A Capsid Mutant	One-way ANOVA with Dunnett's multiple comparison's test	NT vs. CPSF6 #5	1	27.49	-26.49	4.517	3	3	5.864	12	-26.49	-39.59 to -13.38	Yes	***	0.000329965
3	d	Donor Q	P90A Capsid Mutant	One-way ANOVA with Dunnett's multiple comparison's test	NT vs. CPSF6 #6	1	8.909	-7.909	4.517	3	3	1.751	12	-7.909	-21.02 to 5.197	No	ns	0.326867
3	d	Donor Q	P90A Capsid Mutant	One-way ANOVA with Dunnett's multiple comparison's test	NT vs. TRIM5α #6	1	12.88	-11.88	4.517	3	3	2.63	12	-11.88	-24.99 to 1.227	No	ns	0.0801568
3	d	Donor Q	P90A Capsid Mutant	One-way ANOVA with Dunnett's multiple comparison's test	NT vs. TRIM5α #7	1	37.03	-36.03	4.517	3	3	7.977	12	-36.03	-49.14 to -22.93	Yes	****	1.70534e-05
3	e	Donor O	DMSO	One-way ANOVA with Dunnett's multiple comparison's test	NT vs. CPSF6 #5	1	2.14	-1.14	0.08345	3	3	13.66	14	-1.14	-1.383 to -0.8972	Yes	****	9.5e-09
3	e	Donor O	DMSO	One-way ANOVA with Dunnett's multiple comparison's test	NT vs. CPSF6 #6	1	1.884	-0.8838	0.08345	3	3	10.59	14	-0.8838	-1.127 to -0.6407	Yes	****	2.47e-07
3	e	Donor O	DMSO	One-way ANOVA with Dunnett's multiple comparison's test	NT vs. TRIM5α #6	1	1.146	-0.1465	0.08345	3	3	1.755	14	-0.1465	-0.3895 to 0.09659	No	ns	0.352529
3	e	Donor O	DMSO	One-way ANOVA with Dunnett's multiple comparison's test	NT vs. TRIM5α #7	1	1.162	-0.1619	0.08345	3	3	1.94	14	-0.1619	-0.4050 to 0.08115	No	ns	0.26776
3	e	Donor O	Cyclosporin A	One-way ANOVA with Dunnett's multiple comparison's test	NT vs. CPSF6 #5	1	4.44	-3.44	0.3334	3	3	10.32	14	-3.44	-4.412 to -2.469	Yes	****	3.418e-07
3	e	Donor O	Cyclosporin A	One-way ANOVA with Dunnett's multiple comparison's test	NT vs. CPSF6 #6	1	3.73	-2.73	0.3334	3	3	8.187	14	-2.73	-3.701 to -1.759	Yes	****	5.5742e-06
3	e	Donor O	Cyclosporin A	One-way ANOVA with Dunnett's multiple comparison's test	NT vs. TRIM5α #6	1	8.812	-7.812	0.3334	3	3	23.43	14	-7.812	-8.783 to -6.841	Yes	****	<0.0000000001
3	e	Donor O	Cyclosporin A	One-way ANOVA with Dunnett's multiple comparison's test	NT vs. TRIM5α #7	1	19.68	-18.68	0.3334	3	3	56.03	14	-18.68	-19.65 to -17.71	Yes	****	<0.0000000001
3	e	Donor P	DMSO	One-way ANOVA with Dunnett's multiple comparison's test	NT vs. CPSF6 #5	1	1.726	-0.7259	0.1343	3	3	5.405	14	-0.7259	-1.117 to -0.3347	Yes	***	0.00047512
3	e	Donor P	DMSO	One-way ANOVA with Dunnett's multiple comparison's test	NT vs. CPSF6 #6	1	1.676	-0.6762	0.1343	3	3	5.035	14	-0.6762	-1.067 to -0.2850	Yes	***	0.000924097
3	e	Donor P	DMSO	One-way ANOVA with Dunnett's multiple comparison's test	NT vs. TRIM5α #6	1	1.121	-0.1206	0.1343	3	3	0.8978	14	-0.1206	-0.5117 to 0.2706	No	ns	0.872873
3	e	Donor P	DMSO	One-way ANOVA with Dunnett's multiple comparison's test	NT vs. TRIM5α #7	1	1.004	-0.003584	0.1343	3	3	0.02669	14	-0.003584	-0.3947 to 0.3876	No	ns	1
3	e	Donor P	Cyclosporin A	One-way ANOVA with Dunnett's multiple comparison's test	NT vs. CPSF6 #5	1	5.992	-4.992	0.8156	3	3	6.121	14	-4.992	-7.367 to -2.617	Yes	***	0.000137709
3	e	Donor P	Cyclosporin A	One-way ANOVA with Dunnett's multiple comparison's test	NT vs. CPSF6 #6	1	4.219	-3.219	0.8156	3	3	3.947	14	-3.219	-5.594 to -0.8437	Yes	**	0.00704547
3	e	Donor P	Cyclosporin A	One-way ANOVA with Dunnett's multiple comparison's test	NT vs. TRIM5α #6	1	11.93	-10.93	0.8156	3	3	13.4	14	-10.93	-13.30 to -8.551	Yes	****	1.22e-08
3	e	Donor P	Cyclosporin A	One-way ANOVA with Dunnett's multiple comparison's test	NT vs. TRIM5α #7	1	17.23	-16.23	0.8156	3	3	19.9	14	-16.23	-18.61 to -13.86	Yes	****	<0.0000000001
3	e	Donor Q	DMSO	One-way ANOVA with Dunnett's multiple comparison's test	NT vs. CPSF6 #5	1	1.589	-0.5888	0.05466	3	3	10.77	14	-0.5888	-0.7480 to -0.4296	Yes	****	1.997e-07
3	e	Donor Q	DMSO	One-way ANOVA with Dunnett's multiple comparison's test	NT vs. CPSF6 #6	1	1.361	-0.3612	0.05466	3	3	6.608	14	-0.3612	-0.5204 to -0.2020	Yes	****	6.1618e-05
3	e	Donor Q	DMSO	One-way ANOVA with Dunnett's multiple comparison's test	NT vs. TRIM5α #6	1	1.081	-0.08092	0.05466	3	3	1.48	14	-0.08092	-0.2401 to 0.07829	No	ns	0.50879
3	e	Donor Q	DMSO	One-way ANOVA with Dunnett's multiple comparison's test	NT vs. TRIM5α #7	1	1.13	-0.1302	0.05466	3	3	2.381	14	-0.1302	-0.2894 to 0.02905	No	ns	0.129903
3	e	Donor Q	Cyclosporin A	One-way ANOVA with Dunnett's multiple comparison's test	NT vs. CPSF6 #5	1	7.568	-6.568	0.9005	3	3	7.293	14	-6.568	-9.191 to -3.945	Yes	****	2.09032e-05
3	e	Donor Q	Cyclosporin A	One-way ANOVA with Dunnett's multiple comparison's test	NT vs. CPSF6 #6	1	5.693	-4.693	0.9005	3	3	5.211	14	-4.693	-7.316 to -2.070	Yes	***	0.000671798
3	e	Donor Q	Cyclosporin A	One-way ANOVA with Dunnett's multiple comparison's test	NT vs. TRIM5α #6	1	16.21	-15.21	0.9005	3	3	16.89	14	-15.21	-17.84 to -12.59	Yes	****	6e-10
3	e	Donor Q	Cyclosporin A	One-way ANOVA with Dunnett's multiple comparison's test	NT vs. TRIM5α #7	1	37.37	-36.37	0.9005	3	3	40.38	14	-36.37	-38.99 to -33.75	Yes	****	<0.0000000001

## Sheet: Fig. 4 Statistics
Row Statistics
Figure	Panel	Sample	Treatment	Guide RNA	Readout	Mean	SD	N
4	g	Donor U	n/a	NT #4	Fold Change in HIV-1 Infected Cells (GFP+) Normalized to Non-Targeting per condition	1	0.111039	3
4	g	Donor U	n/a	CXCR4	Fold Change in HIV-1 Infected Cells (GFP+) Normalized to Non-Targeting per condition	0.0062037	0.00200387	3
4	g	Donor U	n/a	CYPA #3	Fold Change in HIV-1 Infected Cells (GFP+) Normalized to Non-Targeting per condition	0.134271	0.00855758	3
4	g	Donor U	n/a	CPSF5 #3	Fold Change in HIV-1 Infected Cells (GFP+) Normalized to Non-Targeting per condition	2.43894	0.318691	3
4	g	Donor U	n/a	CPSF5 #12	Fold Change in HIV-1 Infected Cells (GFP+) Normalized to Non-Targeting per condition	2.63864	0.245153	3
4	g	Donor V	n/a	NT #4	Fold Change in HIV-1 Infected Cells (GFP+) Normalized to Non-Targeting per condition	1	0.0117229	3
4	g	Donor V	n/a	CXCR4	Fold Change in HIV-1 Infected Cells (GFP+) Normalized to Non-Targeting per condition	0.00684646	0.00239746	3
4	g	Donor V	n/a	CYPA #3	Fold Change in HIV-1 Infected Cells (GFP+) Normalized to Non-Targeting per condition	0.118454	0.0341693	3
4	g	Donor V	n/a	CPSF5 #3	Fold Change in HIV-1 Infected Cells (GFP+) Normalized to Non-Targeting per condition	1.80265	0.394415	3
4	g	Donor V	n/a	CPSF5 #12	Fold Change in HIV-1 Infected Cells (GFP+) Normalized to Non-Targeting per condition	2.36646	0.284626	3
4	g	Donor W	n/a	NT #4	Fold Change in HIV-1 Infected Cells (GFP+) Normalized to Non-Targeting per condition	1	0.171919	3
4	g	Donor W	n/a	CXCR4	Fold Change in HIV-1 Infected Cells (GFP+) Normalized to Non-Targeting per condition	0.00149752	0.000683742	3
4	g	Donor W	n/a	CYPA #3	Fold Change in HIV-1 Infected Cells (GFP+) Normalized to Non-Targeting per condition	0.124361	0.0155388	3
4	g	Donor W	n/a	CPSF5 #3	Fold Change in HIV-1 Infected Cells (GFP+) Normalized to Non-Targeting per condition	2.73274	0.23072	3
4	g	Donor W	n/a	CPSF5 #12	Fold Change in HIV-1 Infected Cells (GFP+) Normalized to Non-Targeting per condition	2.91672	0.287382	3
Significance Tests
Figure	Panel	Sample	Treatment	Test	Comparison	Mean 1	Mean 2	Mean Diff.	SE of diff.	n1	n2	q	DF	Mean Diff.	95.00% CI of diff.	Below threshold? (Alpha = 0.05)	Summary	Adjusted P Value
4	g	Donor U	n/a	One-way ANOVA with Dunnett's multiple comparison's test	NT #4 vs. CPSF5 #3	1	2.439	-1.439	0.1523	3	3	9.445	10	-1.439	-1.879 to -0.9986	Yes	****	9.4431e-06
4	g	Donor U	n/a	One-way ANOVA with Dunnett's multiple comparison's test	NT #4 vs. CPSF5 #12	1	2.639	-1.639	0.1523	3	3	10.76	10	-1.639	-2.079 to -1.198	Yes	****	2.876e-06
4	g	Donor V	n/a	One-way ANOVA with Dunnett's multiple comparison's test	NT #4 vs. CPSF5 #3	1	1.803	-0.8027	0.1781	3	3	4.507	10	-0.8027	-1.317 to -0.2879	Yes	**	0.00379548
4	g	Donor V	n/a	One-way ANOVA with Dunnett's multiple comparison's test	NT #4 vs. CPSF5 #12	1	2.366	-1.366	0.1781	3	3	7.673	10	-1.366	-1.881 to -0.8517	Yes	****	5.93311e-05
4	g	Donor W	n/a	One-way ANOVA with Dunnett's multiple comparison's test	NT #4 vs. CPSF5 #3	1	2.733	-1.733	0.1486	3	3	11.66	10	-1.733	-2.162 to -1.303	Yes	****	1.3576e-06
4	g	Donor W	n/a	One-way ANOVA with Dunnett's multiple comparison's test	NT #4 vs. CPSF5 #12	1	2.917	-1.917	0.1486	3	3	12.9	10	-1.917	-2.346 to -1.487	Yes	****	5.254e-07

## Sheet: Extended Data Fig. 1 Statistics
Row Statistics
Figure	Panel	Sample	Treatment	Guide RNA	Readout	Mean	SD	N
Extended Data 1	c	Day 5 Donor AD	0.025 ng virus	NT	Fold Change in HIV-1 Infected Cells (GFP+) Normalized to Non-Targeting per condition	1	0.197257	3
Extended Data 1	c	Day 5 Donor AD	0.025 ng virus	CXCR4	Fold Change in HIV-1 Infected Cells (GFP+) Normalized to Non-Targeting per condition	0.00728367	0.00408752	3
Extended Data 1	c	Day 5 Donor AD	0.025 ng virus	CYPA #3	Fold Change in HIV-1 Infected Cells (GFP+) Normalized to Non-Targeting per condition	0.096068	0.0179251	3
Extended Data 1	c	Day 5 Donor AD	0.025 ng virus	CPSF6 #5	Fold Change in HIV-1 Infected Cells (GFP+) Normalized to Non-Targeting per condition	2.76365	0.364365	3
Extended Data 1	c	Day 5 Donor AD	0.025 ng virus	CPSF6 #6	Fold Change in HIV-1 Infected Cells (GFP+) Normalized to Non-Targeting per condition	3.08097	0.626723	3
Extended Data 1	c	Day 5 Donor AD	0.05 ng virus	NT	Fold Change in HIV-1 Infected Cells (GFP+) Normalized to Non-Targeting per condition	1	0.136205	3
Extended Data 1	c	Day 5 Donor AD	0.05 ng virus	CXCR4	Fold Change in HIV-1 Infected Cells (GFP+) Normalized to Non-Targeting per condition	0.00827633	0.00132999	3
Extended Data 1	c	Day 5 Donor AD	0.05 ng virus	CYPA #3	Fold Change in HIV-1 Infected Cells (GFP+) Normalized to Non-Targeting per condition	0.102726	0.0193615	3
Extended Data 1	c	Day 5 Donor AD	0.05 ng virus	CPSF6 #5	Fold Change in HIV-1 Infected Cells (GFP+) Normalized to Non-Targeting per condition	2.64912	0.536824	3
Extended Data 1	c	Day 5 Donor AD	0.05 ng virus	CPSF6 #6	Fold Change in HIV-1 Infected Cells (GFP+) Normalized to Non-Targeting per condition	2.42589	0.681141	3
Extended Data 1	c	Day 5 Donor AD	0.1 ng virus	NT	Fold Change in HIV-1 Infected Cells (GFP+) Normalized to Non-Targeting per condition	1	0.111037	3
Extended Data 1	c	Day 5 Donor AD	0.1 ng virus	CXCR4	Fold Change in HIV-1 Infected Cells (GFP+) Normalized to Non-Targeting per condition	0.007648	0.00619073	3
Extended Data 1	c	Day 5 Donor AD	0.1 ng virus	CYPA #3	Fold Change in HIV-1 Infected Cells (GFP+) Normalized to Non-Targeting per condition	0.129085	0.0125467	3
Extended Data 1	c	Day 5 Donor AD	0.1 ng virus	CPSF6 #5	Fold Change in HIV-1 Infected Cells (GFP+) Normalized to Non-Targeting per condition	3.08544	0.264382	3
Extended Data 1	c	Day 5 Donor AD	0.1 ng virus	CPSF6 #6	Fold Change in HIV-1 Infected Cells (GFP+) Normalized to Non-Targeting per condition	3.5237	0.249466	3
Extended Data 1	c	Day 5 Donor AD	0.2 ng virus	NT	Fold Change in HIV-1 Infected Cells (GFP+) Normalized to Non-Targeting per condition	1	0.101014	3
Extended Data 1	c	Day 5 Donor AD	0.2 ng virus	CXCR4	Fold Change in HIV-1 Infected Cells (GFP+) Normalized to Non-Targeting per condition	0.00505833	0.000666725	3
Extended Data 1	c	Day 5 Donor AD	0.2 ng virus	CYPA #3	Fold Change in HIV-1 Infected Cells (GFP+) Normalized to Non-Targeting per condition	0.100101	0.0163118	3
Extended Data 1	c	Day 5 Donor AD	0.2 ng virus	CPSF6 #5	Fold Change in HIV-1 Infected Cells (GFP+) Normalized to Non-Targeting per condition	2.55649	0.251296	3
Extended Data 1	c	Day 5 Donor AD	0.2 ng virus	CPSF6 #6	Fold Change in HIV-1 Infected Cells (GFP+) Normalized to Non-Targeting per condition	2.51289	0.517713	3
Extended Data 1	c	Day 5 Donor AE	0.025 ng virus	NT	Fold Change in HIV-1 Infected Cells (GFP+) Normalized to Non-Targeting per condition	1	0.16633	3
Extended Data 1	c	Day 5 Donor AE	0.025 ng virus	CXCR4	Fold Change in HIV-1 Infected Cells (GFP+) Normalized to Non-Targeting per condition	0.0154647	0.00774184	3
Extended Data 1	c	Day 5 Donor AE	0.025 ng virus	CYPA #3	Fold Change in HIV-1 Infected Cells (GFP+) Normalized to Non-Targeting per condition	0.085211	0.000358627	3
Extended Data 1	c	Day 5 Donor AE	0.025 ng virus	CPSF6 #5	Fold Change in HIV-1 Infected Cells (GFP+) Normalized to Non-Targeting per condition	5.28672	1.28045	3
Extended Data 1	c	Day 5 Donor AE	0.025 ng virus	CPSF6 #6	Fold Change in HIV-1 Infected Cells (GFP+) Normalized to Non-Targeting per condition	5.1801	0.0633996	3
Extended Data 1	c	Day 5 Donor AE	0.05 ng virus	NT	Fold Change in HIV-1 Infected Cells (GFP+) Normalized to Non-Targeting per condition	1	0.0749326	3
Extended Data 1	c	Day 5 Donor AE	0.05 ng virus	CXCR4	Fold Change in HIV-1 Infected Cells (GFP+) Normalized to Non-Targeting per condition	0.0111203	0.00429519	3
Extended Data 1	c	Day 5 Donor AE	0.05 ng virus	CYPA #3	Fold Change in HIV-1 Infected Cells (GFP+) Normalized to Non-Targeting per condition	0.092954	0.00677373	3
Extended Data 1	c	Day 5 Donor AE	0.05 ng virus	CPSF6 #5	Fold Change in HIV-1 Infected Cells (GFP+) Normalized to Non-Targeting per condition	3.86212	0.722237	3
Extended Data 1	c	Day 5 Donor AE	0.05 ng virus	CPSF6 #6	Fold Change in HIV-1 Infected Cells (GFP+) Normalized to Non-Targeting per condition	4.85796	0.763816	3
Extended Data 1	c	Day 5 Donor AE	0.1 ng virus	NT	Fold Change in HIV-1 Infected Cells (GFP+) Normalized to Non-Targeting per condition	1	0.174099	3
Extended Data 1	c	Day 5 Donor AE	0.1 ng virus	CXCR4	Fold Change in HIV-1 Infected Cells (GFP+) Normalized to Non-Targeting per condition	0.00484433	0.00574249	3
Extended Data 1	c	Day 5 Donor AE	0.1 ng virus	CYPA #3	Fold Change in HIV-1 Infected Cells (GFP+) Normalized to Non-Targeting per condition	0.0871217	0.025519	3
Extended Data 1	c	Day 5 Donor AE	0.1 ng virus	CPSF6 #5	Fold Change in HIV-1 Infected Cells (GFP+) Normalized to Non-Targeting per condition	3.6486	0.203441	3
Extended Data 1	c	Day 5 Donor AE	0.1 ng virus	CPSF6 #6	Fold Change in HIV-1 Infected Cells (GFP+) Normalized to Non-Targeting per condition	4.53441	0.105969	3
Extended Data 1	c	Day 5 Donor AE	0.2 ng virus	NT	Fold Change in HIV-1 Infected Cells (GFP+) Normalized to Non-Targeting per condition	1	0.0350598	3
Extended Data 1	c	Day 5 Donor AE	0.2 ng virus	CXCR4	Fold Change in HIV-1 Infected Cells (GFP+) Normalized to Non-Targeting per condition	0.00420767	0.00143646	3
Extended Data 1	c	Day 5 Donor AE	0.2 ng virus	CYPA #3	Fold Change in HIV-1 Infected Cells (GFP+) Normalized to Non-Targeting per condition	0.0900087	0.0130333	3
Extended Data 1	c	Day 5 Donor AE	0.2 ng virus	CPSF6 #5	Fold Change in HIV-1 Infected Cells (GFP+) Normalized to Non-Targeting per condition	3.00577	0.491557	3
Extended Data 1	c	Day 5 Donor AE	0.2 ng virus	CPSF6 #6	Fold Change in HIV-1 Infected Cells (GFP+) Normalized to Non-Targeting per condition	3.17295	0.408919	3
Extended Data 1	c	Day 5 Donor AF	0.25 ng virus	NT	Fold Change in HIV-1 Infected Cells (GFP+) Normalized to Non-Targeting per condition	1	0.167835	3
Extended Data 1	c	Day 5 Donor AF	0.25 ng virus	CXCR4	Fold Change in HIV-1 Infected Cells (GFP+) Normalized to Non-Targeting per condition	0.006849	0.00159481	3
Extended Data 1	c	Day 5 Donor AF	0.25 ng virus	CYPA #3	Fold Change in HIV-1 Infected Cells (GFP+) Normalized to Non-Targeting per condition	0.35299	0.0723137	3
Extended Data 1	c	Day 5 Donor AF	0.25 ng virus	CPSF6 #5	Fold Change in HIV-1 Infected Cells (GFP+) Normalized to Non-Targeting per condition	1.89149	0.360937	3
Extended Data 1	c	Day 5 Donor AF	0.25 ng virus	CPSF6 #6	Fold Change in HIV-1 Infected Cells (GFP+) Normalized to Non-Targeting per condition	1.4027	0.112244	3
Extended Data 1	c	Day 5 Donor AF	0.5 ng virus	NT	Fold Change in HIV-1 Infected Cells (GFP+) Normalized to Non-Targeting per condition	1	0.252386	3
Extended Data 1	c	Day 5 Donor AF	0.5 ng virus	CXCR4	Fold Change in HIV-1 Infected Cells (GFP+) Normalized to Non-Targeting per condition	0.00657367	0.00258366	3
Extended Data 1	c	Day 5 Donor AF	0.5 ng virus	CYPA #3	Fold Change in HIV-1 Infected Cells (GFP+) Normalized to Non-Targeting per condition	0.445408	0.0754642	3
Extended Data 1	c	Day 5 Donor AF	0.5 ng virus	CPSF6 #5	Fold Change in HIV-1 Infected Cells (GFP+) Normalized to Non-Targeting per condition	1.88598	0.259176	3
Extended Data 1	c	Day 5 Donor AF	0.5 ng virus	CPSF6 #6	Fold Change in HIV-1 Infected Cells (GFP+) Normalized to Non-Targeting per condition	1.24158	0.295097	3
Extended Data 1	c	Day 5 Donor AF	0.75 ng virus	NT	Fold Change in HIV-1 Infected Cells (GFP+) Normalized to Non-Targeting per condition	1	0.0263342	3
Extended Data 1	c	Day 5 Donor AF	0.75 ng virus	CXCR4	Fold Change in HIV-1 Infected Cells (GFP+) Normalized to Non-Targeting per condition	0.00350033	0.00021531	3
Extended Data 1	c	Day 5 Donor AF	0.75 ng virus	CYPA #3	Fold Change in HIV-1 Infected Cells (GFP+) Normalized to Non-Targeting per condition	0.382235	0.0603759	3
Extended Data 1	c	Day 5 Donor AF	0.75 ng virus	CPSF6 #5	Fold Change in HIV-1 Infected Cells (GFP+) Normalized to Non-Targeting per condition	1.23773	0.172755	3
Extended Data 1	c	Day 5 Donor AF	0.75 ng virus	CPSF6 #6	Fold Change in HIV-1 Infected Cells (GFP+) Normalized to Non-Targeting per condition	0.852291	0.0355416	3
Extended Data 1	c	Day 5 Donor AF	1 ng virus	NT	Fold Change in HIV-1 Infected Cells (GFP+) Normalized to Non-Targeting per condition	1	0.151714	3
Extended Data 1	c	Day 5 Donor AF	1 ng virus	CXCR4	Fold Change in HIV-1 Infected Cells (GFP+) Normalized to Non-Targeting per condition	0.005461	0.000127279	2	(One technical replicate ommitted due to sample loss during flow cytometry)
Extended Data 1	c	Day 5 Donor AF	1 ng virus	CYPA #3	Fold Change in HIV-1 Infected Cells (GFP+) Normalized to Non-Targeting per condition	0.429887	0.0504643	3
Extended Data 1	c	Day 5 Donor AF	1 ng virus	CPSF6 #5	Fold Change in HIV-1 Infected Cells (GFP+) Normalized to Non-Targeting per condition	1.37668	0.107525	3
Extended Data 1	c	Day 5 Donor AF	1 ng virus	CPSF6 #6	Fold Change in HIV-1 Infected Cells (GFP+) Normalized to Non-Targeting per condition	1.06272	0.213168	3
Extended Data 1	c	Day 5 Donor AG	0.25 ng virus	NT	Fold Change in HIV-1 Infected Cells (GFP+) Normalized to Non-Targeting per condition	1	0.0969168	3
Extended Data 1	c	Day 5 Donor AG	0.25 ng virus	CXCR4	Fold Change in HIV-1 Infected Cells (GFP+) Normalized to Non-Targeting per condition	0.00703667	0.00434357	3
Extended Data 1	c	Day 5 Donor AG	0.25 ng virus	CYPA #3	Fold Change in HIV-1 Infected Cells (GFP+) Normalized to Non-Targeting per condition	0.113592	0.0139304	3
Extended Data 1	c	Day 5 Donor AG	0.25 ng virus	CPSF6 #5	Fold Change in HIV-1 Infected Cells (GFP+) Normalized to Non-Targeting per condition	1.87112	0.0983257	3
Extended Data 1	c	Day 5 Donor AG	0.25 ng virus	CPSF6 #6	Fold Change in HIV-1 Infected Cells (GFP+) Normalized to Non-Targeting per condition	1.7295	0.0943417	3
Extended Data 1	c	Day 5 Donor AG	0.5 ng virus	NT	Fold Change in HIV-1 Infected Cells (GFP+) Normalized to Non-Targeting per condition	1	0.0254675	3
Extended Data 1	c	Day 5 Donor AG	0.5 ng virus	CXCR4	Fold Change in HIV-1 Infected Cells (GFP+) Normalized to Non-Targeting per condition	0.003409	0.000377361	3
Extended Data 1	c	Day 5 Donor AG	0.5 ng virus	CYPA #3	Fold Change in HIV-1 Infected Cells (GFP+) Normalized to Non-Targeting per condition	0.122131	0.0265716	3
Extended Data 1	c	Day 5 Donor AG	0.5 ng virus	CPSF6 #5	Fold Change in HIV-1 Infected Cells (GFP+) Normalized to Non-Targeting per condition	1.64226	0.201572	3
Extended Data 1	c	Day 5 Donor AG	0.5 ng virus	CPSF6 #6	Fold Change in HIV-1 Infected Cells (GFP+) Normalized to Non-Targeting per condition	1.41553	0.207637	3
Extended Data 1	c	Day 5 Donor AG	0.75 ng virus	NT	Fold Change in HIV-1 Infected Cells (GFP+) Normalized to Non-Targeting per condition	1	0.0587813	3
Extended Data 1	c	Day 5 Donor AG	0.75 ng virus	CXCR4	Fold Change in HIV-1 Infected Cells (GFP+) Normalized to Non-Targeting per condition	0.00370733	0.000979844	3
Extended Data 1	c	Day 5 Donor AG	0.75 ng virus	CYPA #3	Fold Change in HIV-1 Infected Cells (GFP+) Normalized to Non-Targeting per condition	0.15607	0.0200423	3
Extended Data 1	c	Day 5 Donor AG	0.75 ng virus	CPSF6 #5	Fold Change in HIV-1 Infected Cells (GFP+) Normalized to Non-Targeting per condition	1.40618	0.0534778	3
Extended Data 1	c	Day 5 Donor AG	0.75 ng virus	CPSF6 #6	Fold Change in HIV-1 Infected Cells (GFP+) Normalized to Non-Targeting per condition	1.17726	0.0448685	3
Extended Data 1	c	Day 5 Donor AG	1 ng virus	NT	Fold Change in HIV-1 Infected Cells (GFP+) Normalized to Non-Targeting per condition	1	0.326929	3
Extended Data 1	c	Day 5 Donor AG	1 ng virus	CXCR4	Fold Change in HIV-1 Infected Cells (GFP+) Normalized to Non-Targeting per condition	0.002041	0.000877318	3
Extended Data 1	c	Day 5 Donor AG	1 ng virus	CYPA #3	Fold Change in HIV-1 Infected Cells (GFP+) Normalized to Non-Targeting per condition	0.114681	0.0389526	3
Extended Data 1	c	Day 5 Donor AG	1 ng virus	CPSF6 #5	Fold Change in HIV-1 Infected Cells (GFP+) Normalized to Non-Targeting per condition	1.20992	0.164717	3
Extended Data 1	c	Day 5 Donor AG	1 ng virus	CPSF6 #6	Fold Change in HIV-1 Infected Cells (GFP+) Normalized to Non-Targeting per condition	1.11156	0.157901	3
Significance Tests
Figure	Panel	Sample	Treatment	Test	Comparison	Mean 1	Mean 2	Mean Diff.	SE of diff.	n1	n2	q	DF	Mean Diff.	95.00% CI of diff.	Below threshold? (Alpha = 0.05)	Summary	Adjusted P Value
Extended Data 1	c	Day 5 Donor AD	0.025 ng virus	One-way ANOVA with Dunnett's multiple comparison's test	NT vs. CPSF6 #5	1	2.764	-1.764	0.2744	3	3	6.427	10	-1.764	-2.557 to -0.9704	Yes	***	0.000262339
Extended Data 1	c	Day 5 Donor AD	0.025 ng virus	One-way ANOVA with Dunnett's multiple comparison's test	NT vs. CPSF6 #6	1	3.081	-2.081	0.2744	3	3	7.583	10	-2.081	-2.874 to -1.288	Yes	****	6.56276e-05
Extended Data 1	c	Day 5 Donor AD	0.05 ng virus	One-way ANOVA with Dunnett's multiple comparison's test	NT vs. CPSF6 #5	1	2.649	-1.649	0.3206	3	3	5.143	10	-1.649	-2.576 to -0.7223	Yes	**	0.00148334
Extended Data 1	c	Day 5 Donor AD	0.05 ng virus	One-way ANOVA with Dunnett's multiple comparison's test	NT vs. CPSF6 #6	1	2.426	-1.426	0.3206	3	3	4.447	10	-1.426	-2.353 to -0.4991	Yes	**	0.00415682
Extended Data 1	c	Day 5 Donor AD	0.1 ng virus	One-way ANOVA with Dunnett's multiple comparison's test	NT vs. CPSF6 #5	1	3.085	-2.085	0.1389	3	3	15.02	10	-2.085	-2.487 to -1.684	Yes	****	1.233e-07
Extended Data 1	c	Day 5 Donor AD	0.1 ng virus	One-way ANOVA with Dunnett's multiple comparison's test	NT vs. CPSF6 #6	1	3.524	-2.524	0.1389	3	3	18.17	10	-2.524	-2.925 to -2.122	Yes	****	1.95e-08
Extended Data 1	c	Day 5 Donor AD	0.2 ng virus	One-way ANOVA with Dunnett's multiple comparison's test	NT vs. CPSF6 #5	1	2.556	-1.556	0.2134	3	3	7.293	10	-1.556	-2.173 to -0.9396	Yes	****	9.16247e-05
Extended Data 1	c	Day 5 Donor AD	0.2 ng virus	One-way ANOVA with Dunnett's multiple comparison's test	NT vs. CPSF6 #6	1	2.513	-1.513	0.2134	3	3	7.088	10	-1.513	-2.130 to -0.8960	Yes	***	0.000116511
Extended Data 1	c	Day 5 Donor AE	0.025 ng virus	One-way ANOVA with Dunnett's multiple comparison's test	NT vs. CPSF6 #5	1	5.287	-4.287	0.4721	3	3	9.081	10	-4.287	-5.651 to -2.922	Yes	****	1.34579e-05
Extended Data 1	c	Day 5 Donor AE	0.025 ng virus	One-way ANOVA with Dunnett's multiple comparison's test	NT vs. CPSF6 #6	1	5.18	-4.18	0.4721	3	3	8.855	10	-4.18	-5.545 to -2.816	Yes	****	1.68603e-05
Extended Data 1	c	Day 5 Donor AE	0.05 ng virus	One-way ANOVA with Dunnett's multiple comparison's test	NT vs. CPSF6 #5	1	3.862	-2.862	0.3848	3	3	7.437	10	-2.862	-3.974 to -1.750	Yes	****	7.75105e-05
Extended Data 1	c	Day 5 Donor AE	0.05 ng virus	One-way ANOVA with Dunnett's multiple comparison's test	NT vs. CPSF6 #6	1	4.858	-3.858	0.3848	3	3	10.03	10	-3.858	-4.970 to -2.746	Yes	****	5.4931e-06
Extended Data 1	c	Day 5 Donor AE	0.1 ng virus	One-way ANOVA with Dunnett's multiple comparison's test	NT vs. CPSF6 #5	1	3.649	-2.649	0.1056	3	3	25.08	10	-2.649	-2.954 to -2.343	Yes	****	8e-10
Extended Data 1	c	Day 5 Donor AE	0.1 ng virus	One-way ANOVA with Dunnett's multiple comparison's test	NT vs. CPSF6 #6	1	4.534	-3.534	0.1056	3	3	33.47	10	-3.534	-3.840 to -3.229	Yes	****	<0.0000000001
Extended Data 1	c	Day 5 Donor AE	0.2 ng virus	One-way ANOVA with Dunnett's multiple comparison's test	NT vs. CPSF6 #5	1	3.006	-2.006	0.2339	3	3	8.576	10	-2.006	-2.682 to -1.330	Yes	****	2.24134e-05
Extended Data 1	c	Day 5 Donor AE	0.2 ng virus	One-way ANOVA with Dunnett's multiple comparison's test	NT vs. CPSF6 #6	1	3.173	-2.173	0.2339	3	3	9.291	10	-2.173	-2.849 to -1.497	Yes	****	1.09566e-05
Extended Data 1	c	Day 5 Donor AF	0.25 ng virus	One-way ANOVA with Dunnett's multiple comparison's test	NT vs. CPSF6 #5	1	1.891	-0.8915	0.1533	3	3	5.815	10	-0.8915	-1.335 to -0.4483	Yes	***	0.000583224
Extended Data 1	c	Day 5 Donor AF	0.25 ng virus	One-way ANOVA with Dunnett's multiple comparison's test	NT vs. CPSF6 #6	1	1.403	-0.4027	0.1533	3	3	2.627	10	-0.4027	-0.8458 to 0.04044	No	ns	0.0767998
Extended Data 1	c	Day 5 Donor AF	0.5 ng virus	One-way ANOVA with Dunnett's multiple comparison's test	NT vs. CPSF6 #5	1	1.886	-0.886	0.1727	3	3	5.131	10	-0.886	-1.385 to -0.3868	Yes	**	0.00151059
Extended Data 1	c	Day 5 Donor AF	0.5 ng virus	One-way ANOVA with Dunnett's multiple comparison's test	NT vs. CPSF6 #6	1	1.242	-0.2416	0.1727	3	3	1.399	10	-0.2416	-0.7407 to 0.2576	No	ns	0.470598
Extended Data 1	c	Day 5 Donor AF	0.75 ng virus	One-way ANOVA with Dunnett's multiple comparison's test	NT vs. CPSF6 #5	1	1.238	-0.2377	0.06875	3	3	3.458	10	-0.2377	-0.4365 to -0.03902	Yes	*	0.0198016
Extended Data 1	c	Day 5 Donor AF	0.75 ng virus	One-way ANOVA with Dunnett's multiple comparison's test	NT vs. CPSF6 #6	1	0.8523	0.1477	0.06875	3	3	2.149	10	0.1477	-0.05101 to 0.3464	No	ns	0.163964
Extended Data 1	c	Day 5 Donor AF	1 ng virus	One-way ANOVA with Dunnett's multiple comparison's test	NT vs. CPSF6 #5	1	1.377	-0.3767	0.1106	3	3	3.406	9	-0.3767	-0.7039 to -0.04947	Yes	*	0.0250444
Extended Data 1	c	Day 5 Donor AF	1 ng virus	One-way ANOVA with Dunnett's multiple comparison's test	NT vs. CPSF6 #6	1	1.063	-0.06272	0.1106	3	3	0.5671	9	-0.06272	-0.3899 to 0.2645	No	ns	0.94354
Extended Data 1	c	Day 5 Donor AG	0.25 ng virus	One-way ANOVA with Dunnett's multiple comparison's test	NT vs. CPSF6 #5	1	1.871	-0.8711	0.06129	3	3	14.21	10	-0.8711	-1.048 to -0.6940	Yes	****	2.088e-07
Extended Data 1	c	Day 5 Donor AG	0.25 ng virus	One-way ANOVA with Dunnett's multiple comparison's test	NT vs. CPSF6 #6	1	1.729	-0.7295	0.06129	3	3	11.9	10	-0.7295	-0.9067 to -0.5523	Yes	****	1.1202e-06
Extended Data 1	c	Day 5 Donor AG	0.5 ng virus	One-way ANOVA with Dunnett's multiple comparison's test	NT vs. CPSF6 #5	1	1.642	-0.6423	0.1065	3	3	6.029	10	-0.6423	-0.9502 to -0.3344	Yes	***	0.000438393
Extended Data 1	c	Day 5 Donor AG	0.5 ng virus	One-way ANOVA with Dunnett's multiple comparison's test	NT vs. CPSF6 #6	1	1.416	-0.4155	0.1065	3	3	3.901	10	-0.4155	-0.7234 to -0.1076	Yes	**	0.0097261
Extended Data 1	c	Day 5 Donor AG	0.75 ng virus	One-way ANOVA with Dunnett's multiple comparison's test	NT vs. CPSF6 #5	1	1.406	-0.4062	0.03412	3	3	11.9	10	-0.4062	-0.5048 to -0.3076	Yes	****	1.118e-06
Extended Data 1	c	Day 5 Donor AG	0.75 ng virus	One-way ANOVA with Dunnett's multiple comparison's test	NT vs. CPSF6 #6	1	1.177	-0.1773	0.03412	3	3	5.195	10	-0.1773	-0.2759 to -0.07863	Yes	**	0.00137703
Extended Data 1	c	Day 5 Donor AG	1 ng virus	One-way ANOVA with Dunnett's multiple comparison's test	NT vs. CPSF6 #5	1	1.21	-0.2099	0.1463	3	3	1.435	10	-0.2099	-0.6327 to 0.2129	No	ns	0.450111
Extended Data 1	c	Day 5 Donor AG	1 ng virus	One-way ANOVA with Dunnett's multiple comparison's test	NT vs. CPSF6 #6	1	1.112	-0.1116	0.1463	3	3	0.7627	10	-0.1116	-0.5344 to 0.3112	No	ns	0.857727

## Sheet: Extended Data Fig. 2 Statistics
Row Statistics
Figure	Panel	Sample	Treatment	Guide RNA	Readout	Mean	SD	N
Extended Data 2	b	Donors E-G	n/a	NT #3	Ghost Red Viability Stain, Percent viable cells (Ghost red-)	71.6048	2.7068	3
Extended Data 2	b	Donors E-G	n/a	NT #4	Ghost Red Viability Stain, Percent viable cells (Ghost red-)	72.6026	2.6194	3
Extended Data 2	b	Donors E-G	n/a	CPSF6 #5	Ghost Red Viability Stain, Percent viable cells (Ghost red-)	73.7031	1.70211	3
Extended Data 2	b	Donors E-G	n/a	CPSF6 #6	Ghost Red Viability Stain, Percent viable cells (Ghost red-)	71.8257	4.2497	3
Extended Data 2	b	Donors E-G	n/a	TRIM5α #6	Ghost Red Viability Stain, Percent viable cells (Ghost red-)	70.0325	3.65076	3
Extended Data 2	b	Donors E-G	n/a	TRIM5α #7	Ghost Red Viability Stain, Percent viable cells (Ghost red-)	78.2219	5.70996	3
Extended Data 2	f	Donor H-J	CD4 Stain	NT #4	Mean Fluorescence Intensity of CD4-PE	17563.3	2948.28	3
Extended Data 2	f	Donor H-J	CD4 Stain	CXCR4	Mean Fluorescence Intensity of CD4-PE	18178.7	2201.05	3
Extended Data 2	f	Donor H-J	CD4 Stain	CCR5	Mean Fluorescence Intensity of CD4-PE	18808.7	1505.1	3
Extended Data 2	f	Donor H-J	CD4 Stain	CYPA #3	Mean Fluorescence Intensity of CD4-PE	19421	1660.04	3
Extended Data 2	f	Donor H-J	CD4 Stain	CPSF6 #5	Mean Fluorescence Intensity of CD4-PE	22672	2661.36	3
Extended Data 2	f	Donor H-J	CD4 Stain	CPSF6 #6	Mean Fluorescence Intensity of CD4-PE	22538.3	2306.14	3
Extended Data 2	f	Donor H-J	CD4 Stain	TRIM5α #6	Mean Fluorescence Intensity of CD4-PE	17432.3	3412.31	3
Extended Data 2	f	Donor H-J	CD4 Stain	TRIM5α #7	Mean Fluorescence Intensity of CD4-PE	15957.7	3021.58	3
Extended Data 2	f	Donor H-J	CXCR4 Stain	NT #4	Mean Fluorescence Intensity of CXCR4-APC	2969.33	436.88	3
Extended Data 2	f	Donor H-J	CXCR4 Stain	CXCR4	Mean Fluorescence Intensity of CXCR4-APC	97.9	6.58255	3
Extended Data 2	f	Donor H-J	CXCR4 Stain	CCR5	Mean Fluorescence Intensity of CXCR4-APC	3814	238.195	3
Extended Data 2	f	Donor H-J	CXCR4 Stain	CYPA #3	Mean Fluorescence Intensity of CXCR4-APC	3793.33	475.648	3
Extended Data 2	f	Donor H-J	CXCR4 Stain	CPSF6 #5	Mean Fluorescence Intensity of CXCR4-APC	6927.33	217.569	3
Extended Data 2	f	Donor H-J	CXCR4 Stain	CPSF6 #6	Mean Fluorescence Intensity of CXCR4-APC	7538.67	119.215	3
Extended Data 2	f	Donor H-J	CXCR4 Stain	TRIM5α #6	Mean Fluorescence Intensity of CXCR4-APC	3613.33	406.542	3
Extended Data 2	f	Donor H-J	CXCR4 Stain	TRIM5α #7	Mean Fluorescence Intensity of CXCR4-APC	3853.33	312.83	3
Extended Data 2	f	Donor H-J	CD25 Stain	NT #4	Mean Fluorescence Intensity of CD25-APC	9486.67	348.721	3
Extended Data 2	f	Donor H-J	CD25 Stain	CXCR4	Mean Fluorescence Intensity of CD25-APC	9927.67	1995.03	3
Extended Data 2	f	Donor H-J	CD25 Stain	CCR5	Mean Fluorescence Intensity of CD25-APC	10183	1241.96	3
Extended Data 2	f	Donor H-J	CD25 Stain	CYPA #3	Mean Fluorescence Intensity of CD25-APC	9974.67	706.111	3
Extended Data 2	f	Donor H-J	CD25 Stain	CPSF6 #5	Mean Fluorescence Intensity of CD25-APC	35834.7	10921.4	3
Extended Data 2	f	Donor H-J	CD25 Stain	CPSF6 #6	Mean Fluorescence Intensity of CD25-APC	37161.7	16879.2	3
Extended Data 2	f	Donor H-J	CD25 Stain	TRIM5α #6	Mean Fluorescence Intensity of CD25-APC	8485.33	583.467	3
Extended Data 2	f	Donor H-J	CD25 Stain	TRIM5α #7	Mean Fluorescence Intensity of CD25-APC	9324	518.61	3
Extended Data 2	g	Donor H-J	CCR5 Stain	NT #4	Mean Fluorescence Intensity of CCR5-APC	493.333	24.3379	3
Extended Data 2	g	Donor H-J	CCR5 Stain	CXCR4	Mean Fluorescence Intensity of CCR5-APC	780.333	287.041	3
Extended Data 2	g	Donor H-J	CCR5 Stain	CCR5	Mean Fluorescence Intensity of CCR5-APC	371	205.672	3
Extended Data 2	g	Donor H-J	CCR5 Stain	CYPA #3	Mean Fluorescence Intensity of CCR5-APC	580.333	163.58	3
Extended Data 2	g	Donor H-J	CCR5 Stain	CPSF6 #5	Mean Fluorescence Intensity of CCR5-APC	642.667	143.514	3
Extended Data 2	g	Donor H-J	CCR5 Stain	CPSF6 #6	Mean Fluorescence Intensity of CCR5-APC	626	18.3303	3
Extended Data 2	g	Donor H-J	CCR5 Stain	TRIM5α #6	Mean Fluorescence Intensity of CCR5-APC	525	31.1769	3
Extended Data 2	g	Donor H-J	CCR5 Stain	TRIM5α #7	Mean Fluorescence Intensity of CCR5-APC	506	82.6015	3
Extended Data 2	h	Donor AH	0.02 ng NL4-3	NT #4	Fold Change in HIV-1 Infected Cells (GFP+) Normalized to Non-Targeting per condition	1	0.348839	3
Extended Data 2	h	Donor AH	0.02 ng NL4-3	CXCR4	Fold Change in HIV-1 Infected Cells (GFP+) Normalized to Non-Targeting per condition	0.0332393	0.0575722	3
Extended Data 2	h	Donor AH	0.02 ng NL4-3	CYPA #3	Fold Change in HIV-1 Infected Cells (GFP+) Normalized to Non-Targeting per condition	0.276846	0.252536	3
Extended Data 2	h	Donor AH	0.02 ng NL4-3	CPSF6 #5	Fold Change in HIV-1 Infected Cells (GFP+) Normalized to Non-Targeting per condition	1.54828	0.541518	3
Extended Data 2	h	Donor AH	0.02 ng NL4-3	CPSF6 #6	Fold Change in HIV-1 Infected Cells (GFP+) Normalized to Non-Targeting per condition	1.16589	0.403914	3
Extended Data 2	h	Donor AH	0.05 ng NL4-3	NT #4	Fold Change in HIV-1 Infected Cells (GFP+) Normalized to Non-Targeting per condition	1	0.0716376	3
Extended Data 2	h	Donor AH	0.05 ng NL4-3	CXCR4	Fold Change in HIV-1 Infected Cells (GFP+) Normalized to Non-Targeting per condition	0.0203703	0.0352825	3
Extended Data 2	h	Donor AH	0.05 ng NL4-3	CYPA #3	Fold Change in HIV-1 Infected Cells (GFP+) Normalized to Non-Targeting per condition	0.330335	0.286202	3
Extended Data 2	h	Donor AH	0.05 ng NL4-3	CPSF6 #5	Fold Change in HIV-1 Infected Cells (GFP+) Normalized to Non-Targeting per condition	2.07655	0.442944	3
Extended Data 2	h	Donor AH	0.05 ng NL4-3	CPSF6 #6	Fold Change in HIV-1 Infected Cells (GFP+) Normalized to Non-Targeting per condition	2.11647	0.188812	2	(One technical replicate ommitted due to sample loss during flow cytometry)
Extended Data 2	h	Donor AH	0.1 ng NL4-3	NT #4	Fold Change in HIV-1 Infected Cells (GFP+) Normalized to Non-Targeting per condition	1	0.125993	3
Extended Data 2	h	Donor AH	0.1 ng NL4-3	CXCR4	Fold Change in HIV-1 Infected Cells (GFP+) Normalized to Non-Targeting per condition	0.0102033	0.0176727	3
Extended Data 2	h	Donor AH	0.1 ng NL4-3	CYPA #3	Fold Change in HIV-1 Infected Cells (GFP+) Normalized to Non-Targeting per condition	0.515762	0.0468763	3
Extended Data 2	h	Donor AH	0.1 ng NL4-3	CPSF6 #5	Fold Change in HIV-1 Infected Cells (GFP+) Normalized to Non-Targeting per condition	2.05466	0.1925	3
Extended Data 2	h	Donor AH	0.1 ng NL4-3	CPSF6 #6	Fold Change in HIV-1 Infected Cells (GFP+) Normalized to Non-Targeting per condition	2.62216	0.530288	3
Extended Data 2	h	Donor AH	0.2 ng NL4-3	NT #4	Fold Change in HIV-1 Infected Cells (GFP+) Normalized to Non-Targeting per condition	1	0.233343	3
Extended Data 2	h	Donor AH	0.2 ng NL4-3	CXCR4	Fold Change in HIV-1 Infected Cells (GFP+) Normalized to Non-Targeting per condition	0.005154	0.00892699	3
Extended Data 2	h	Donor AH	0.2 ng NL4-3	CYPA #3	Fold Change in HIV-1 Infected Cells (GFP+) Normalized to Non-Targeting per condition	0.303587	0.182523	3
Extended Data 2	h	Donor AH	0.2 ng NL4-3	CPSF6 #5	Fold Change in HIV-1 Infected Cells (GFP+) Normalized to Non-Targeting per condition	2.0158	0.0709048	3
Extended Data 2	h	Donor AH	0.2 ng NL4-3	CPSF6 #6	Fold Change in HIV-1 Infected Cells (GFP+) Normalized to Non-Targeting per condition	2.02014	0.279375	3
Extended Data 2	h	Donor AH	0.5 ng NL4-3	NT #4	Fold Change in HIV-1 Infected Cells (GFP+) Normalized to Non-Targeting per condition	1	0.0938748	3
Extended Data 2	h	Donor AH	0.5 ng NL4-3	CXCR4	Fold Change in HIV-1 Infected Cells (GFP+) Normalized to Non-Targeting per condition	0.00599433	0.00345461	3
Extended Data 2	h	Donor AH	0.5 ng NL4-3	CYPA #3	Fold Change in HIV-1 Infected Cells (GFP+) Normalized to Non-Targeting per condition	0.335253	0.0579221	3
Extended Data 2	h	Donor AH	0.5 ng NL4-3	CPSF6 #5	Fold Change in HIV-1 Infected Cells (GFP+) Normalized to Non-Targeting per condition	2.03111	0.402662	3
Extended Data 2	h	Donor AH	0.5 ng NL4-3	CPSF6 #6	Fold Change in HIV-1 Infected Cells (GFP+) Normalized to Non-Targeting per condition	2.55761	0.505671	3
Extended Data 2	h	Donor AH	1.0 ng NL4-3	NT #4	Fold Change in HIV-1 Infected Cells (GFP+) Normalized to Non-Targeting per condition	1	0.183016	3
Extended Data 2	h	Donor AH	1.0 ng NL4-3	CXCR4	Fold Change in HIV-1 Infected Cells (GFP+) Normalized to Non-Targeting per condition	0.00508567	0.00178666	3
Extended Data 2	h	Donor AH	1.0 ng NL4-3	CYPA #3	Fold Change in HIV-1 Infected Cells (GFP+) Normalized to Non-Targeting per condition	0.291521	0.0529502	3
Extended Data 2	h	Donor AH	1.0 ng NL4-3	CPSF6 #5	Fold Change in HIV-1 Infected Cells (GFP+) Normalized to Non-Targeting per condition	1.62541	0.505385	3
Extended Data 2	h	Donor AH	1.0 ng NL4-3	CPSF6 #6	Fold Change in HIV-1 Infected Cells (GFP+) Normalized to Non-Targeting per condition	1.99547	0.473962	3
Extended Data 2	h	Donor AH	0.02 ng NL4-3 VSV-G	NT #4	Fold Change in HIV-1 Infected Cells (GFP+) Normalized to Non-Targeting per condition	1	0.167516	3
Extended Data 2	h	Donor AH	0.02 ng NL4-3 VSV-G	CXCR4	Fold Change in HIV-1 Infected Cells (GFP+) Normalized to Non-Targeting per condition	1.04986	0.0547871	3
Extended Data 2	h	Donor AH	0.02 ng NL4-3 VSV-G	CYPA #3	Fold Change in HIV-1 Infected Cells (GFP+) Normalized to Non-Targeting per condition	0.308263	0.139027	3
Extended Data 2	h	Donor AH	0.02 ng NL4-3 VSV-G	CPSF6 #5	Fold Change in HIV-1 Infected Cells (GFP+) Normalized to Non-Targeting per condition	0.934301	0.171948	3
Extended Data 2	h	Donor AH	0.02 ng NL4-3 VSV-G	CPSF6 #6	Fold Change in HIV-1 Infected Cells (GFP+) Normalized to Non-Targeting per condition	1.06724	0.343845	3
Extended Data 2	h	Donor AH	0.05 ng NL4-3 VSV-G	NT #4	Fold Change in HIV-1 Infected Cells (GFP+) Normalized to Non-Targeting per condition	1	0.172224	3
Extended Data 2	h	Donor AH	0.05 ng NL4-3 VSV-G	CXCR4	Fold Change in HIV-1 Infected Cells (GFP+) Normalized to Non-Targeting per condition	0.861318	0.0915557	3
Extended Data 2	h	Donor AH	0.05 ng NL4-3 VSV-G	CYPA #3	Fold Change in HIV-1 Infected Cells (GFP+) Normalized to Non-Targeting per condition	0.273105	0.0919523	3
Extended Data 2	h	Donor AH	0.05 ng NL4-3 VSV-G	CPSF6 #5	Fold Change in HIV-1 Infected Cells (GFP+) Normalized to Non-Targeting per condition	1.0422	0.117596	3
Extended Data 2	h	Donor AH	0.05 ng NL4-3 VSV-G	CPSF6 #6	Fold Change in HIV-1 Infected Cells (GFP+) Normalized to Non-Targeting per condition	1.00428	0.142985	3
Extended Data 2	h	Donor AH	0.1 ng NL4-3 VSV-G	NT #4	Fold Change in HIV-1 Infected Cells (GFP+) Normalized to Non-Targeting per condition	1	0.0258668	3
Extended Data 2	h	Donor AH	0.1 ng NL4-3 VSV-G	CXCR4	Fold Change in HIV-1 Infected Cells (GFP+) Normalized to Non-Targeting per condition	0.924652	0.0762554	3
Extended Data 2	h	Donor AH	0.1 ng NL4-3 VSV-G	CYPA #3	Fold Change in HIV-1 Infected Cells (GFP+) Normalized to Non-Targeting per condition	0.315612	0.0516097	3
Extended Data 2	h	Donor AH	0.1 ng NL4-3 VSV-G	CPSF6 #5	Fold Change in HIV-1 Infected Cells (GFP+) Normalized to Non-Targeting per condition	0.996313	0.0739278	3
Extended Data 2	h	Donor AH	0.1 ng NL4-3 VSV-G	CPSF6 #6	Fold Change in HIV-1 Infected Cells (GFP+) Normalized to Non-Targeting per condition	0.817676	0.127316	3
Extended Data 2	h	Donor AH	0.2 ng NL4-3 VSV-G	NT #4	Fold Change in HIV-1 Infected Cells (GFP+) Normalized to Non-Targeting per condition	1	0.142459	3
Extended Data 2	h	Donor AH	0.2 ng NL4-3 VSV-G	CXCR4	Fold Change in HIV-1 Infected Cells (GFP+) Normalized to Non-Targeting per condition	0.828729	0.109415	3
Extended Data 2	h	Donor AH	0.2 ng NL4-3 VSV-G	CYPA #3	Fold Change in HIV-1 Infected Cells (GFP+) Normalized to Non-Targeting per condition	0.359631	0.0322369	3
Extended Data 2	h	Donor AH	0.2 ng NL4-3 VSV-G	CPSF6 #5	Fold Change in HIV-1 Infected Cells (GFP+) Normalized to Non-Targeting per condition	1.15708	0.0517193	3
Extended Data 2	h	Donor AH	0.2 ng NL4-3 VSV-G	CPSF6 #6	Fold Change in HIV-1 Infected Cells (GFP+) Normalized to Non-Targeting per condition	0.972735	0.108884	3
Extended Data 2	h	Donor AH	0.5 ng NL4-3 VSV-G	NT #4	Fold Change in HIV-1 Infected Cells (GFP+) Normalized to Non-Targeting per condition	1	0.0591445	3
Extended Data 2	h	Donor AH	0.5 ng NL4-3 VSV-G	CXCR4	Fold Change in HIV-1 Infected Cells (GFP+) Normalized to Non-Targeting per condition	1.084	0.0665798	3
Extended Data 2	h	Donor AH	0.5 ng NL4-3 VSV-G	CYPA #3	Fold Change in HIV-1 Infected Cells (GFP+) Normalized to Non-Targeting per condition	0.345736	0.0354375	3
Extended Data 2	h	Donor AH	0.5 ng NL4-3 VSV-G	CPSF6 #5	Fold Change in HIV-1 Infected Cells (GFP+) Normalized to Non-Targeting per condition	1.00722	0.0112625	3
Extended Data 2	h	Donor AH	0.5 ng NL4-3 VSV-G	CPSF6 #6	Fold Change in HIV-1 Infected Cells (GFP+) Normalized to Non-Targeting per condition	1.02314	0.129293	3
Extended Data 2	h	Donor AH	1.0 ng NL4-3 VSV-G	NT #4	Fold Change in HIV-1 Infected Cells (GFP+) Normalized to Non-Targeting per condition	1	0.0341885	3
Extended Data 2	h	Donor AH	1.0 ng NL4-3 VSV-G	CXCR4	Fold Change in HIV-1 Infected Cells (GFP+) Normalized to Non-Targeting per condition	0.87007	0.00149763	3
Extended Data 2	h	Donor AH	1.0 ng NL4-3 VSV-G	CYPA #3	Fold Change in HIV-1 Infected Cells (GFP+) Normalized to Non-Targeting per condition	0.369373	0.0190669	3
Extended Data 2	h	Donor AH	1.0 ng NL4-3 VSV-G	CPSF6 #5	Fold Change in HIV-1 Infected Cells (GFP+) Normalized to Non-Targeting per condition	0.987443	0.0519713	3
Extended Data 2	h	Donor AH	1.0 ng NL4-3 VSV-G	CPSF6 #6	Fold Change in HIV-1 Infected Cells (GFP+) Normalized to Non-Targeting per condition	0.929428	0.0498869	3
Extended Data 2	h	Donor AI	0.02 ng NL4-3	NT #4	Fold Change in HIV-1 Infected Cells (GFP+) Normalized to Non-Targeting per condition	1	0.461533	3
Extended Data 2	h	Donor AI	0.02 ng NL4-3	CXCR4	Fold Change in HIV-1 Infected Cells (GFP+) Normalized to Non-Targeting per condition	0.0324443	0.0561952	3
Extended Data 2	h	Donor AI	0.02 ng NL4-3	CYPA #3	Fold Change in HIV-1 Infected Cells (GFP+) Normalized to Non-Targeting per condition	0.252771	0.125668	3
Extended Data 2	h	Donor AI	0.02 ng NL4-3	CPSF6 #5	Fold Change in HIV-1 Infected Cells (GFP+) Normalized to Non-Targeting per condition	1.5952	0.472336	3
Extended Data 2	h	Donor AI	0.02 ng NL4-3	CPSF6 #6	Fold Change in HIV-1 Infected Cells (GFP+) Normalized to Non-Targeting per condition	1.43407	0.614471	3
Extended Data 2	h	Donor AI	0.05 ng NL4-3	NT #4	Fold Change in HIV-1 Infected Cells (GFP+) Normalized to Non-Targeting per condition	1	0.142969	3
Extended Data 2	h	Donor AI	0.05 ng NL4-3	CXCR4	Fold Change in HIV-1 Infected Cells (GFP+) Normalized to Non-Targeting per condition	0	0	3
Extended Data 2	h	Donor AI	0.05 ng NL4-3	CYPA #3	Fold Change in HIV-1 Infected Cells (GFP+) Normalized to Non-Targeting per condition	0.523916	0.249394	3
Extended Data 2	h	Donor AI	0.05 ng NL4-3	CPSF6 #5	Fold Change in HIV-1 Infected Cells (GFP+) Normalized to Non-Targeting per condition	1.69415	0.527422	3
Extended Data 2	h	Donor AI	0.05 ng NL4-3	CPSF6 #6	Fold Change in HIV-1 Infected Cells (GFP+) Normalized to Non-Targeting per condition	1.80352	0.582723	3
Extended Data 2	h	Donor AI	0.1 ng NL4-3	NT #4	Fold Change in HIV-1 Infected Cells (GFP+) Normalized to Non-Targeting per condition	1	0.161604	3
Extended Data 2	h	Donor AI	0.1 ng NL4-3	CXCR4	Fold Change in HIV-1 Infected Cells (GFP+) Normalized to Non-Targeting per condition	0.013595	0.0118102	3
Extended Data 2	h	Donor AI	0.1 ng NL4-3	CYPA #3	Fold Change in HIV-1 Infected Cells (GFP+) Normalized to Non-Targeting per condition	0.282816	0.0471199	3
Extended Data 2	h	Donor AI	0.1 ng NL4-3	CPSF6 #5	Fold Change in HIV-1 Infected Cells (GFP+) Normalized to Non-Targeting per condition	1.63013	0.714161	3
Extended Data 2	h	Donor AI	0.1 ng NL4-3	CPSF6 #6	Fold Change in HIV-1 Infected Cells (GFP+) Normalized to Non-Targeting per condition	2.10326	0.767008	3
Extended Data 2	h	Donor AI	0.2 ng NL4-3	NT #4	Fold Change in HIV-1 Infected Cells (GFP+) Normalized to Non-Targeting per condition	1	0.0700485	3
Extended Data 2	h	Donor AI	0.2 ng NL4-3	CXCR4	Fold Change in HIV-1 Infected Cells (GFP+) Normalized to Non-Targeting per condition	0.00356933	0.00618227	3
Extended Data 2	h	Donor AI	0.2 ng NL4-3	CYPA #3	Fold Change in HIV-1 Infected Cells (GFP+) Normalized to Non-Targeting per condition	0.386184	0.035374	3
Extended Data 2	h	Donor AI	0.2 ng NL4-3	CPSF6 #5	Fold Change in HIV-1 Infected Cells (GFP+) Normalized to Non-Targeting per condition	1.51492	0.0546841	3
Extended Data 2	h	Donor AI	0.2 ng NL4-3	CPSF6 #6	Fold Change in HIV-1 Infected Cells (GFP+) Normalized to Non-Targeting per condition	1.66161	0.0851864	3
Extended Data 2	h	Donor AI	0.5 ng NL4-3	NT #4	Fold Change in HIV-1 Infected Cells (GFP+) Normalized to Non-Targeting per condition	1	0.136573	3
Extended Data 2	h	Donor AI	0.5 ng NL4-3	CXCR4	Fold Change in HIV-1 Infected Cells (GFP+) Normalized to Non-Targeting per condition	0.002801	0.00243926	3
Extended Data 2	h	Donor AI	0.5 ng NL4-3	CYPA #3	Fold Change in HIV-1 Infected Cells (GFP+) Normalized to Non-Targeting per condition	0.393179	0.09926	3
Extended Data 2	h	Donor AI	0.5 ng NL4-3	CPSF6 #5	Fold Change in HIV-1 Infected Cells (GFP+) Normalized to Non-Targeting per condition	2.03748	0.156602	3
Extended Data 2	h	Donor AI	0.5 ng NL4-3	CPSF6 #6	Fold Change in HIV-1 Infected Cells (GFP+) Normalized to Non-Targeting per condition	3.37382	0.997489	3
Extended Data 2	h	Donor AI	1.0 ng NL4-3	NT #4	Fold Change in HIV-1 Infected Cells (GFP+) Normalized to Non-Targeting per condition	1	0.172917	3
Extended Data 2	h	Donor AI	1.0 ng NL4-3	CXCR4	Fold Change in HIV-1 Infected Cells (GFP+) Normalized to Non-Targeting per condition	0.00313167	0.00290022	3
Extended Data 2	h	Donor AI	1.0 ng NL4-3	CYPA #3	Fold Change in HIV-1 Infected Cells (GFP+) Normalized to Non-Targeting per condition	0.358013	0.0349449	3
Extended Data 2	h	Donor AI	1.0 ng NL4-3	CPSF6 #5	Fold Change in HIV-1 Infected Cells (GFP+) Normalized to Non-Targeting per condition	2.10494	0.273726	3
Extended Data 2	h	Donor AI	1.0 ng NL4-3	CPSF6 #6	Fold Change in HIV-1 Infected Cells (GFP+) Normalized to Non-Targeting per condition	1.99412	0.425876	3
Extended Data 2	h	Donor AI	0.02 ng NL4-3 VSV-G	NT #4	Fold Change in HIV-1 Infected Cells (GFP+) Normalized to Non-Targeting per condition	1	0.116411	3
Extended Data 2	h	Donor AI	0.02 ng NL4-3 VSV-G	CXCR4	Fold Change in HIV-1 Infected Cells (GFP+) Normalized to Non-Targeting per condition	1.21009	0.125226	3
Extended Data 2	h	Donor AI	0.02 ng NL4-3 VSV-G	CYPA #3	Fold Change in HIV-1 Infected Cells (GFP+) Normalized to Non-Targeting per condition	0.633369	0.105934	3
Extended Data 2	h	Donor AI	0.02 ng NL4-3 VSV-G	CPSF6 #5	Fold Change in HIV-1 Infected Cells (GFP+) Normalized to Non-Targeting per condition	1.21692	0.365682	3
Extended Data 2	h	Donor AI	0.02 ng NL4-3 VSV-G	CPSF6 #6	Fold Change in HIV-1 Infected Cells (GFP+) Normalized to Non-Targeting per condition	1.1871	0.703193	3
Extended Data 2	h	Donor AI	0.05 ng NL4-3 VSV-G	NT #4	Fold Change in HIV-1 Infected Cells (GFP+) Normalized to Non-Targeting per condition	1	0.0462594	3
Extended Data 2	h	Donor AI	0.05 ng NL4-3 VSV-G	CXCR4	Fold Change in HIV-1 Infected Cells (GFP+) Normalized to Non-Targeting per condition	0.962349	0.0588999	3
Extended Data 2	h	Donor AI	0.05 ng NL4-3 VSV-G	CYPA #3	Fold Change in HIV-1 Infected Cells (GFP+) Normalized to Non-Targeting per condition	0.425465	0.0637113	3
Extended Data 2	h	Donor AI	0.05 ng NL4-3 VSV-G	CPSF6 #5	Fold Change in HIV-1 Infected Cells (GFP+) Normalized to Non-Targeting per condition	1.12239	0.223181	3
Extended Data 2	h	Donor AI	0.05 ng NL4-3 VSV-G	CPSF6 #6	Fold Change in HIV-1 Infected Cells (GFP+) Normalized to Non-Targeting per condition	0.94516	0.141081	3
Extended Data 2	h	Donor AI	0.1 ng NL4-3 VSV-G	NT #4	Fold Change in HIV-1 Infected Cells (GFP+) Normalized to Non-Targeting per condition	1	0.148464	3
Extended Data 2	h	Donor AI	0.1 ng NL4-3 VSV-G	CXCR4	Fold Change in HIV-1 Infected Cells (GFP+) Normalized to Non-Targeting per condition	0.985474	0.100696	3
Extended Data 2	h	Donor AI	0.1 ng NL4-3 VSV-G	CYPA #3	Fold Change in HIV-1 Infected Cells (GFP+) Normalized to Non-Targeting per condition	0.352295	0.014481	3
Extended Data 2	h	Donor AI	0.1 ng NL4-3 VSV-G	CPSF6 #5	Fold Change in HIV-1 Infected Cells (GFP+) Normalized to Non-Targeting per condition	1.0696	0.113322	3
Extended Data 2	h	Donor AI	0.1 ng NL4-3 VSV-G	CPSF6 #6	Fold Change in HIV-1 Infected Cells (GFP+) Normalized to Non-Targeting per condition	1.14592	0.157794	3
Extended Data 2	h	Donor AI	0.2 ng NL4-3 VSV-G	NT #4	Fold Change in HIV-1 Infected Cells (GFP+) Normalized to Non-Targeting per condition	1	0.0374081	3
Extended Data 2	h	Donor AI	0.2 ng NL4-3 VSV-G	CXCR4	Fold Change in HIV-1 Infected Cells (GFP+) Normalized to Non-Targeting per condition	1.05781	0.0668299	3
Extended Data 2	h	Donor AI	0.2 ng NL4-3 VSV-G	CYPA #3	Fold Change in HIV-1 Infected Cells (GFP+) Normalized to Non-Targeting per condition	0.438144	0.0266225	3
Extended Data 2	h	Donor AI	0.2 ng NL4-3 VSV-G	CPSF6 #5	Fold Change in HIV-1 Infected Cells (GFP+) Normalized to Non-Targeting per condition	1.11746	0.0591734	3
Extended Data 2	h	Donor AI	0.2 ng NL4-3 VSV-G	CPSF6 #6	Fold Change in HIV-1 Infected Cells (GFP+) Normalized to Non-Targeting per condition	1.04807	0.0515673	3
Extended Data 2	h	Donor AI	0.5 ng NL4-3 VSV-G	NT #4	Fold Change in HIV-1 Infected Cells (GFP+) Normalized to Non-Targeting per condition	1	0.0624281	3
Extended Data 2	h	Donor AI	0.5 ng NL4-3 VSV-G	CXCR4	Fold Change in HIV-1 Infected Cells (GFP+) Normalized to Non-Targeting per condition	1.14195	0.0632173	3
Extended Data 2	h	Donor AI	0.5 ng NL4-3 VSV-G	CYPA #3	Fold Change in HIV-1 Infected Cells (GFP+) Normalized to Non-Targeting per condition	0.431362	0.0360152	3
Extended Data 2	h	Donor AI	0.5 ng NL4-3 VSV-G	CPSF6 #5	Fold Change in HIV-1 Infected Cells (GFP+) Normalized to Non-Targeting per condition	1.16929	0.0720882	3
Extended Data 2	h	Donor AI	0.5 ng NL4-3 VSV-G	CPSF6 #6	Fold Change in HIV-1 Infected Cells (GFP+) Normalized to Non-Targeting per condition	0.983057	0.0151524	3
Extended Data 2	h	Donor AI	1.0 ng NL4-3 VSV-G	NT #4	Fold Change in HIV-1 Infected Cells (GFP+) Normalized to Non-Targeting per condition	1	0.00240175	3
Extended Data 2	h	Donor AI	1.0 ng NL4-3 VSV-G	CXCR4	Fold Change in HIV-1 Infected Cells (GFP+) Normalized to Non-Targeting per condition	0.887992	0.0685909	3
Extended Data 2	h	Donor AI	1.0 ng NL4-3 VSV-G	CYPA #3	Fold Change in HIV-1 Infected Cells (GFP+) Normalized to Non-Targeting per condition	0.501498	0.0196916	3
Extended Data 2	h	Donor AI	1.0 ng NL4-3 VSV-G	CPSF6 #5	Fold Change in HIV-1 Infected Cells (GFP+) Normalized to Non-Targeting per condition	1.18811	0.0745702	3
Extended Data 2	h	Donor AI	1.0 ng NL4-3 VSV-G	CPSF6 #6	Fold Change in HIV-1 Infected Cells (GFP+) Normalized to Non-Targeting per condition	1.15605	0.00719204	3
Extended Data 2	h	Donor AJ	0.02 ng NL4-3	NT #4	Fold Change in HIV-1 Infected Cells (GFP+) Normalized to Non-Targeting per condition	1	0.429012	3
Extended Data 2	h	Donor AJ	0.02 ng NL4-3	CXCR4	Fold Change in HIV-1 Infected Cells (GFP+) Normalized to Non-Targeting per condition	0.0880683	0.0829679	3
Extended Data 2	h	Donor AJ	0.02 ng NL4-3	CYPA #3	Fold Change in HIV-1 Infected Cells (GFP+) Normalized to Non-Targeting per condition	0.399553	0.202955	3
Extended Data 2	h	Donor AJ	0.02 ng NL4-3	CPSF6 #5	Fold Change in HIV-1 Infected Cells (GFP+) Normalized to Non-Targeting per condition	2.1875	1.07812	3
Extended Data 2	h	Donor AJ	0.02 ng NL4-3	CPSF6 #6	Fold Change in HIV-1 Infected Cells (GFP+) Normalized to Non-Targeting per condition	2.16818	0.576026	3
Extended Data 2	h	Donor AJ	0.05 ng NL4-3	NT #4	Fold Change in HIV-1 Infected Cells (GFP+) Normalized to Non-Targeting per condition	1	0.237787	3
Extended Data 2	h	Donor AJ	0.05 ng NL4-3	CXCR4	Fold Change in HIV-1 Infected Cells (GFP+) Normalized to Non-Targeting per condition	0.0576913	0.0291779	3
Extended Data 2	h	Donor AJ	0.05 ng NL4-3	CYPA #3	Fold Change in HIV-1 Infected Cells (GFP+) Normalized to Non-Targeting per condition	0.407923	0.143573	3
Extended Data 2	h	Donor AJ	0.05 ng NL4-3	CPSF6 #5	Fold Change in HIV-1 Infected Cells (GFP+) Normalized to Non-Targeting per condition	3.22115	0.590297	3
Extended Data 2	h	Donor AJ	0.05 ng NL4-3	CPSF6 #6	Fold Change in HIV-1 Infected Cells (GFP+) Normalized to Non-Targeting per condition	2.84818	0.446492	3
Extended Data 2	h	Donor AJ	0.1 ng NL4-3	NT #4	Fold Change in HIV-1 Infected Cells (GFP+) Normalized to Non-Targeting per condition	1	0.162702	3
Extended Data 2	h	Donor AJ	0.1 ng NL4-3	CXCR4	Fold Change in HIV-1 Infected Cells (GFP+) Normalized to Non-Targeting per condition	0.0355937	0.00797016	3
Extended Data 2	h	Donor AJ	0.1 ng NL4-3	CYPA #3	Fold Change in HIV-1 Infected Cells (GFP+) Normalized to Non-Targeting per condition	0.357674	0.0635886	3
Extended Data 2	h	Donor AJ	0.1 ng NL4-3	CPSF6 #5	Fold Change in HIV-1 Infected Cells (GFP+) Normalized to Non-Targeting per condition	2.14514	0.211079	3
Extended Data 2	h	Donor AJ	0.1 ng NL4-3	CPSF6 #6	Fold Change in HIV-1 Infected Cells (GFP+) Normalized to Non-Targeting per condition	2.5636	0.278116	3
Extended Data 2	h	Donor AJ	0.2 ng NL4-3	NT #4	Fold Change in HIV-1 Infected Cells (GFP+) Normalized to Non-Targeting per condition	1	0.0452789	3
Extended Data 2	h	Donor AJ	0.2 ng NL4-3	CXCR4	Fold Change in HIV-1 Infected Cells (GFP+) Normalized to Non-Targeting per condition	0.0235553	0.0142436	3
Extended Data 2	h	Donor AJ	0.2 ng NL4-3	CYPA #3	Fold Change in HIV-1 Infected Cells (GFP+) Normalized to Non-Targeting per condition	0.21633	0.045741	3
Extended Data 2	h	Donor AJ	0.2 ng NL4-3	CPSF6 #5	Fold Change in HIV-1 Infected Cells (GFP+) Normalized to Non-Targeting per condition	1.53991	0.195988	3
Extended Data 2	h	Donor AJ	0.2 ng NL4-3	CPSF6 #6	Fold Change in HIV-1 Infected Cells (GFP+) Normalized to Non-Targeting per condition	2.0126	0.235465	3
Extended Data 2	h	Donor AJ	0.5 ng NL4-3	NT #4	Fold Change in HIV-1 Infected Cells (GFP+) Normalized to Non-Targeting per condition	1	0.126723	3
Extended Data 2	h	Donor AJ	0.5 ng NL4-3	CXCR4	Fold Change in HIV-1 Infected Cells (GFP+) Normalized to Non-Targeting per condition	0.004055	0.0018045	3
Extended Data 2	h	Donor AJ	0.5 ng NL4-3	CYPA #3	Fold Change in HIV-1 Infected Cells (GFP+) Normalized to Non-Targeting per condition	0.283352	0.0328486	3
Extended Data 2	h	Donor AJ	0.5 ng NL4-3	CPSF6 #5	Fold Change in HIV-1 Infected Cells (GFP+) Normalized to Non-Targeting per condition	1.83071	0.08175	3
Extended Data 2	h	Donor AJ	0.5 ng NL4-3	CPSF6 #6	Fold Change in HIV-1 Infected Cells (GFP+) Normalized to Non-Targeting per condition	2.03711	0.115718	3
Extended Data 2	h	Donor AJ	1.0 ng NL4-3	NT #4	Fold Change in HIV-1 Infected Cells (GFP+) Normalized to Non-Targeting per condition	1	0.0438652	3
Extended Data 2	h	Donor AJ	1.0 ng NL4-3	CXCR4	Fold Change in HIV-1 Infected Cells (GFP+) Normalized to Non-Targeting per condition	0.004378	0.00382507	3
Extended Data 2	h	Donor AJ	1.0 ng NL4-3	CYPA #3	Fold Change in HIV-1 Infected Cells (GFP+) Normalized to Non-Targeting per condition	0.236349	0.00910275	3
Extended Data 2	h	Donor AJ	1.0 ng NL4-3	CPSF6 #5	Fold Change in HIV-1 Infected Cells (GFP+) Normalized to Non-Targeting per condition	1.8348	0.166425	3
Extended Data 2	h	Donor AJ	1.0 ng NL4-3	CPSF6 #6	Fold Change in HIV-1 Infected Cells (GFP+) Normalized to Non-Targeting per condition	2.21285	0.189134	3
Extended Data 2	h	Donor AJ	0.02 ng NL4-3 VSV-G	NT #4	Fold Change in HIV-1 Infected Cells (GFP+) Normalized to Non-Targeting per condition	1	0.129126	3
Extended Data 2	h	Donor AJ	0.02 ng NL4-3 VSV-G	CXCR4	Fold Change in HIV-1 Infected Cells (GFP+) Normalized to Non-Targeting per condition	1.18955	0.198291	3
Extended Data 2	h	Donor AJ	0.02 ng NL4-3 VSV-G	CYPA #3	Fold Change in HIV-1 Infected Cells (GFP+) Normalized to Non-Targeting per condition	0.288152	0.0829155	3
Extended Data 2	h	Donor AJ	0.02 ng NL4-3 VSV-G	CPSF6 #5	Fold Change in HIV-1 Infected Cells (GFP+) Normalized to Non-Targeting per condition	1.25206	0.434402	3
Extended Data 2	h	Donor AJ	0.02 ng NL4-3 VSV-G	CPSF6 #6	Fold Change in HIV-1 Infected Cells (GFP+) Normalized to Non-Targeting per condition	1.24571	0.397118	3
Extended Data 2	h	Donor AJ	0.05 ng NL4-3 VSV-G	NT #4	Fold Change in HIV-1 Infected Cells (GFP+) Normalized to Non-Targeting per condition	1	0.105639	3
Extended Data 2	h	Donor AJ	0.05 ng NL4-3 VSV-G	CXCR4	Fold Change in HIV-1 Infected Cells (GFP+) Normalized to Non-Targeting per condition	0.968076	0.0702761	3
Extended Data 2	h	Donor AJ	0.05 ng NL4-3 VSV-G	CYPA #3	Fold Change in HIV-1 Infected Cells (GFP+) Normalized to Non-Targeting per condition	0.259588	0.0645939	3
Extended Data 2	h	Donor AJ	0.05 ng NL4-3 VSV-G	CPSF6 #5	Fold Change in HIV-1 Infected Cells (GFP+) Normalized to Non-Targeting per condition	1.13554	0.114795	3
Extended Data 2	h	Donor AJ	0.05 ng NL4-3 VSV-G	CPSF6 #6	Fold Change in HIV-1 Infected Cells (GFP+) Normalized to Non-Targeting per condition	0.850805	0.393232	3
Extended Data 2	h	Donor AJ	0.1 ng NL4-3 VSV-G	NT #4	Fold Change in HIV-1 Infected Cells (GFP+) Normalized to Non-Targeting per condition	1	0.0292536	3
Extended Data 2	h	Donor AJ	0.1 ng NL4-3 VSV-G	CXCR4	Fold Change in HIV-1 Infected Cells (GFP+) Normalized to Non-Targeting per condition	1.06108	0.10048	3
Extended Data 2	h	Donor AJ	0.1 ng NL4-3 VSV-G	CYPA #3	Fold Change in HIV-1 Infected Cells (GFP+) Normalized to Non-Targeting per condition	0.245641	0.00251136	3
Extended Data 2	h	Donor AJ	0.1 ng NL4-3 VSV-G	CPSF6 #5	Fold Change in HIV-1 Infected Cells (GFP+) Normalized to Non-Targeting per condition	1.27984	0.200322	3
Extended Data 2	h	Donor AJ	0.1 ng NL4-3 VSV-G	CPSF6 #6	Fold Change in HIV-1 Infected Cells (GFP+) Normalized to Non-Targeting per condition	0.942778	0.204952	3
Extended Data 2	h	Donor AJ	0.2 ng NL4-3 VSV-G	NT #4	Fold Change in HIV-1 Infected Cells (GFP+) Normalized to Non-Targeting per condition	1	0.106354	3
Extended Data 2	h	Donor AJ	0.2 ng NL4-3 VSV-G	CXCR4	Fold Change in HIV-1 Infected Cells (GFP+) Normalized to Non-Targeting per condition	1.14268	0.0368026	3
Extended Data 2	h	Donor AJ	0.2 ng NL4-3 VSV-G	CYPA #3	Fold Change in HIV-1 Infected Cells (GFP+) Normalized to Non-Targeting per condition	0.293599	0.025629	3
Extended Data 2	h	Donor AJ	0.2 ng NL4-3 VSV-G	CPSF6 #5	Fold Change in HIV-1 Infected Cells (GFP+) Normalized to Non-Targeting per condition	1.25935	0.0155669	3
Extended Data 2	h	Donor AJ	0.2 ng NL4-3 VSV-G	CPSF6 #6	Fold Change in HIV-1 Infected Cells (GFP+) Normalized to Non-Targeting per condition	0.987686	0.0895445	3
Extended Data 2	h	Donor AJ	0.5 ng NL4-3 VSV-G	NT #4	Fold Change in HIV-1 Infected Cells (GFP+) Normalized to Non-Targeting per condition	1	0.0684887	3
Extended Data 2	h	Donor AJ	0.5 ng NL4-3 VSV-G	CXCR4	Fold Change in HIV-1 Infected Cells (GFP+) Normalized to Non-Targeting per condition	0.934703	0.148088	3
Extended Data 2	h	Donor AJ	0.5 ng NL4-3 VSV-G	CYPA #3	Fold Change in HIV-1 Infected Cells (GFP+) Normalized to Non-Targeting per condition	0.27756	0.0674961	3
Extended Data 2	h	Donor AJ	0.5 ng NL4-3 VSV-G	CPSF6 #5	Fold Change in HIV-1 Infected Cells (GFP+) Normalized to Non-Targeting per condition	1.08491	0.203064	3
Extended Data 2	h	Donor AJ	0.5 ng NL4-3 VSV-G	CPSF6 #6	Fold Change in HIV-1 Infected Cells (GFP+) Normalized to Non-Targeting per condition	0.914854	0.0413938	3
Extended Data 2	h	Donor AJ	1.0 ng NL4-3 VSV-G	NT #4	Fold Change in HIV-1 Infected Cells (GFP+) Normalized to Non-Targeting per condition	1	0.0715882	3
Extended Data 2	h	Donor AJ	1.0 ng NL4-3 VSV-G	CXCR4	Fold Change in HIV-1 Infected Cells (GFP+) Normalized to Non-Targeting per condition	0.953632	0.0872566	3
Extended Data 2	h	Donor AJ	1.0 ng NL4-3 VSV-G	CYPA #3	Fold Change in HIV-1 Infected Cells (GFP+) Normalized to Non-Targeting per condition	0.33082	0.0309438	3
Extended Data 2	h	Donor AJ	1.0 ng NL4-3 VSV-G	CPSF6 #5	Fold Change in HIV-1 Infected Cells (GFP+) Normalized to Non-Targeting per condition	1.21525	0.0696198	3
Extended Data 2	h	Donor AJ	1.0 ng NL4-3 VSV-G	CPSF6 #6	Fold Change in HIV-1 Infected Cells (GFP+) Normalized to Non-Targeting per condition	0.979367	0.0579461	3
Significance Tests
Figure	Panel	Sample	Treatment	Test	Comparison	Mean 1	Mean 2	Mean Diff.	SE of diff.	n1	n2	q	DF	Mean Diff.	95.00% CI of diff.	Below threshold? (Alpha = 0.05)	Summary	Adjusted P Value
Extended Data 2	b	Donors E-G	n/a	Two-way ANOVA with Dunnett's multiple comparison's test	NT #3 vs NT #4	71.6	72.6	-0.9979	2.458	3	3	0.406	10	-0.9979	-8.348 to 6.352	No	ns	0.991677
Extended Data 2	b	Donors E-G	n/a	Two-way ANOVA with Dunnett's multiple comparison's test	NT #3 vs CPSF6 #5	71.6	73.7	-2.098	2.458	3	3	0.8538	10	-2.098	-9.448 to 5.251	No	ns	0.857184
Extended Data 2	b	Donors E-G	n/a	Two-way ANOVA with Dunnett's multiple comparison's test	NT #3 vs CPSF6 #6	71.6	71.83	-0.2209	2.458	3	3	0.08989	10	-0.2209	-7.571 to 7.129	No	ns	0.999994
Extended Data 2	b	Donors E-G	n/a	Two-way ANOVA with Dunnett's multiple comparison's test	NT #3 vs. TRIM5α #6	71.6	70.03	1.572	2.458	3	3	0.6397	10	1.572	-5.777 to 8.922	No	ns	0.946613
Extended Data 2	b	Donors E-G	n/a	Two-way ANOVA with Dunnett's multiple comparison's test	NT #3 vs. TRIM5α #7	71.6	78.22	-6.617	2.458	3	3	2.692	10	-6.617	-13.97 to 0.7326	No	ns	0.0808399
Extended Data 2	f	Donors H-J CPSF6 #5	CD4 Stain	Two-way ANOVA with Dunnett's multiple comparison's test	NT #3 vs CPSF6 #5	17563	22672	-5109	1478	3	3	3.457	14	-5109	-9502 to -715.8	Yes	*	0.0201693
Extended Data 2	f	Donors H-J CPSF6 #6	CD4 Stain	Two-way ANOVA with Dunnett's multiple comparison's test	NT #3 vs CPSF6 #6	17563	22538	-4975	1478	3	3	3.367	14	-4975	-9368 to -582.1	Yes	*	0.0239301
Extended Data 2	f	Donors H-J TRIM5α #6	CD4 Stain	Two-way ANOVA with Dunnett's multiple comparison's test	NT #3 vs TRIM5α #6	17563	17432	131	1478	3	3	0.08865	14	131	-4262 to 4524	No	ns	1
Extended Data 2	f	Donors H-J TRIM5α #7	CD4 Stain	Two-way ANOVA with Dunnett's multiple comparison's test	NT #3 vs TRIM5α #7	17563	15958	1606	1478	3	3	1.087	14	1606	-2787 to 5999	No	ns	0.801251
Extended Data 2	f	Donors H-J CPSF6 #5	CXCR4 Stain	Two-way ANOVA with Dunnett's multiple comparison's test	NT #3 vs CPSF6 #5	2969	6927	-3958	189.6	3	3	20.87	14	-3958	-4522 to -3394	Yes	****	<0.0000000001
Extended Data 2	f	Donors H-J CPSF6 #6	CXCR4 Stain	Two-way ANOVA with Dunnett's multiple comparison's test	NT #3 vs CPSF6 #6	2969	7539	-4569	189.6	3	3	24.1	14	-4569	-5133 to -4006	Yes	****	<0.0000000001
Extended Data 2	f	Donors H-J TRIM5α #6	CXCR4 Stain	Two-way ANOVA with Dunnett's multiple comparison's test	NT #3 vs TRIM5α #6	2969	3613	-644	189.6	3	3	3.396	14	-644	-1208 to -80.28	Yes	*	0.0226348
Extended Data 2	f	Donors H-J TRIM5α #7	CXCR4 Stain	Two-way ANOVA with Dunnett's multiple comparison's test	NT #3 vs TRIM5α #7	2969	3853	-884	189.6	3	3	4.662	14	-884	-1448 to -320.3	Yes	**	0.00208209
Extended Data 2	f	Donors H-J CPSF6 #5	CD25 Stain	Two-way ANOVA with Dunnett's multiple comparison's test	NT #3 vs CPSF6 #5	9487	35835	-26348	5523	3	3	4.77	14	-26348	-42768 to -9928	Yes	**	0.00170492
Extended Data 2	f	Donors H-J CPSF6 #6	CD25 Stain	Two-way ANOVA with Dunnett's multiple comparison's test	NT #3 vs CPSF6 #6	9487	37162	-27675	5523	3	3	5.01	14	-27675	-44095 to -11255	Yes	**	0.00109879
Extended Data 2	f	Donors H-J TRIM5α #6	CD25 Stain	Two-way ANOVA with Dunnett's multiple comparison's test	NT #3 vs TRIM5α #6	9487	8485	1001	5523	3	3	0.1813	14	1001	-15419 to 17422	No	ns	0.999992
Extended Data 2	f	Donors H-J TRIM5α #7	CD25 Stain	Two-way ANOVA with Dunnett's multiple comparison's test	NT #3 vs TRIM5α #7	9487	9324	162.7	5523	3	3	0.02945	14	162.7	-16258 to 16583	No	ns	>0.9999999999
Extended Data 2	g	Donors H-J CPSF6 #5	CCR5 Stain	Two-way ANOVA with Dunnett's multiple comparison's test	NT #4 vs. CPSF6 #5	493.3	642.7	-149.3	112.3	3	3	1.329	14	-149.3	-483.3 to 184.7	No	ns	0.645209
Extended Data 2	g	Donors H-J CPSF6 #6	CCR5 Stain	Two-way ANOVA with Dunnett's multiple comparison's test	NT #4 vs. CPSF6 #6	493.3	626	-132.7	112.3	3	3	1.181	14	-132.7	-466.7 to 201.3	No	ns	0.742738
Extended Data 2	g	Donors H-J TRIM5α #6	CCR5 Stain	Two-way ANOVA with Dunnett's multiple comparison's test	NT #4 vs. TRIM5α #6	493.3	525	-31.67	112.3	3	3	0.2819	14	-31.67	-365.7 to 302.3	No	ns	0.999841
Extended Data 2	g	Donors H-J TRIM5α #7	CCR5 Stain	Two-way ANOVA with Dunnett's multiple comparison's test	NT #4 vs. TRIM5α #7	493.3	506	-12.67	112.3	3	3	0.1127	14	-12.67	-346.7 to 321.3	No	ns	1
Extended Data 2	h	Donor AH	0.02 ng NL4-3	One-way ANOVA with Dunnett's multiple comparison's test	NT #4 vs. CPSF6 #5	1	1.548	-0.5483	0.2933	3	3	1.869	10	-0.5483	-1.396 to 0.2995	No	ns	0.249414
Extended Data 2	h	Donor AH	0.02 ng NL4-3	One-way ANOVA with Dunnett's multiple comparison's test	NT #4 vs. CPSF6 #6	1	1.166	-0.1659	0.2933	3	3	0.5656	10	-0.1659	-1.014 to 0.6819	No	ns	0.942098
Extended Data 2	h	Donor AH	0.05 ng NL4-3	One-way ANOVA with Dunnett's multiple comparison's test	NT #4 vs. CPSF6 #5	1	2.077	-1.077	0.2116	3	3	5.087	9	-1.077	-1.703 to -0.4504	Yes	**	0.00222166
Extended Data 2	h	Donor AH	0.05 ng NL4-3	One-way ANOVA with Dunnett's multiple comparison's test	NT #4 vs. CPSF6 #6	1	2.116	-1.116	0.2366	3	2	4.719	9	-1.116	-1.816 to -0.4164	Yes	**	0.00366472
Extended Data 2	h	Donor AH	0.1 ng NL4-3	One-way ANOVA with Dunnett's multiple comparison's test	NT #4 vs. CPSF6 #5	1	2.055	-1.055	0.2119	3	3	4.978	10	-1.055	-1.667 to -0.4423	Yes	**	0.00188345
Extended Data 2	h	Donor AH	0.1 ng NL4-3	One-way ANOVA with Dunnett's multiple comparison's test	NT #4 vs. CPSF6 #6	1	2.622	-1.622	0.2119	3	3	7.657	10	-1.622	-2.235 to -1.010	Yes	****	6.04059e-05
Extended Data 2	h	Donor AH	0.2 ng NL4-3	One-way ANOVA with Dunnett's multiple comparison's test	NT #4 vs. CPSF6 #5	1	2.016	-1.016	0.151	3	3	6.729	10	-1.016	-1.452 to -0.5794	Yes	***	0.000179937
Extended Data 2	h	Donor AH	0.2 ng NL4-3	One-way ANOVA with Dunnett's multiple comparison's test	NT #4 vs. CPSF6 #6	1	2.02	-1.02	0.151	3	3	6.758	10	-1.02	-1.457 to -0.5838	Yes	***	0.000173698
Extended Data 2	h	Donor AH	0.5 ng NL4-3	One-way ANOVA with Dunnett's multiple comparison's test	NT #4 vs. CPSF6 #5	1	2.031	-1.031	0.2394	3	3	4.306	10	-1.031	-1.723 to -0.3390	Yes	**	0.00515897
Extended Data 2	h	Donor AH	0.5 ng NL4-3	One-way ANOVA with Dunnett's multiple comparison's test	NT #4 vs. CPSF6 #6	1	2.558	-1.558	0.2394	3	3	6.505	10	-1.558	-2.250 to -0.8655	Yes	***	0.000237713
Extended Data 2	h	Donor AH	1.0 ng NL4-3	One-way ANOVA with Dunnett's multiple comparison's test	NT #4 vs. CPSF6 #5	1	1.625	-0.6254	0.2624	3	3	2.384	10	-0.6254	-1.384 to 0.1330	No	ns	0.113469
Extended Data 2	h	Donor AH	1.0 ng NL4-3	One-way ANOVA with Dunnett's multiple comparison's test	NT #4 vs. CPSF6 #6	1	1.995	-0.9955	0.2624	3	3	3.794	10	-0.9955	-1.754 to -0.2370	Yes	*	0.0115323
Extended Data 2	h	Donor AH	0.02 ng NL4-3 VSV-G	One-way ANOVA with Dunnett's multiple comparison's test	NT #4 vs. CPSF6 #5	1	0.9343	0.0657	0.1626	3	3	0.4042	10	0.0657	-0.4042 to 0.5356	No	ns	0.98157
Extended Data 2	h	Donor AH	0.02 ng NL4-3 VSV-G	One-way ANOVA with Dunnett's multiple comparison's test	NT #4 vs. CPSF6 #6	1	1.067	-0.06724	0.1626	3	3	0.4136	10	-0.06724	-0.5371 to 0.4026	No	ns	0.979986
Extended Data 2	h	Donor AH	0.05 ng NL4-3 VSV-G	One-way ANOVA with Dunnett's multiple comparison's test	NT #4 vs. CPSF6 #5	1	1.042	-0.0422	0.1038	3	3	0.4066	10	-0.0422	-0.3422 to 0.2578	No	ns	0.981163
Extended Data 2	h	Donor AH	0.05 ng NL4-3 VSV-G	One-way ANOVA with Dunnett's multiple comparison's test	NT #4 vs. CPSF6 #6	1	1.004	-0.004281	0.1038	3	3	0.04126	10	-0.004281	-0.3043 to 0.2957	No	ns	0.999997
Extended Data 2	h	Donor AH	0.1 ng NL4-3 VSV-G	One-way ANOVA with Dunnett's multiple comparison's test	NT #4 vs. CPSF6 #5	1	0.9963	0.003687	0.06411	3	3	0.05751	10	0.003687	-0.1816 to 0.1890	No	ns	0.999991
Extended Data 2	h	Donor AH	0.1 ng NL4-3 VSV-G	One-way ANOVA with Dunnett's multiple comparison's test	NT #4 vs. CPSF6 #6	1	0.8177	0.1823	0.06411	3	3	2.844	10	0.1823	-0.002978 to 0.3676	No	ns	0.0539342
Extended Data 2	h	Donor AH	0.2 ng NL4-3 VSV-G	One-way ANOVA with Dunnett's multiple comparison's test	NT #4 vs. CPSF6 #5	1	1.157	-0.1571	0.07986	3	3	1.967	10	-0.1571	-0.3879 to 0.07377	No	ns	0.216014
Extended Data 2	h	Donor AH	0.2 ng NL4-3 VSV-G	One-way ANOVA with Dunnett's multiple comparison's test	NT #4 vs. CPSF6 #6	1	0.9727	0.02727	0.07986	3	3	0.3414	10	0.02727	-0.2036 to 0.2581	No	ns	0.990001
Extended Data 2	h	Donor AH	0.5 ng NL4-3 VSV-G	One-way ANOVA with Dunnett's multiple comparison's test	NT #4 vs. CPSF6 #5	1	1.007	-0.007219	0.05891	3	3	0.1225	10	-0.007219	-0.1775 to 0.1631	No	ns	0.999808
Extended Data 2	h	Donor AH	0.5 ng NL4-3 VSV-G	One-way ANOVA with Dunnett's multiple comparison's test	NT #4 vs. CPSF6 #6	1	1.023	-0.02314	0.05891	3	3	0.3927	10	-0.02314	-0.1934 to 0.1472	No	ns	0.983364
Extended Data 2	h	Donor AH	1.0 ng NL4-3 VSV-G	One-way ANOVA with Dunnett's multiple comparison's test	NT #4 vs. CPSF6 #5	1	0.9874	0.01256	0.02994	3	3	0.4194	10	0.01256	-0.07399 to 0.09911	No	ns	0.978992
Extended Data 2	h	Donor AH	1.0 ng NL4-3 VSV-G	One-way ANOVA with Dunnett's multiple comparison's test	NT #4 vs. CPSF6 #6	1	0.9294	0.07057	0.02994	3	3	2.357	10	0.07057	-0.01598 to 0.1571	No	ns	0.118368
Extended Data 2	h	Donor AI	0.02 ng NL4-3	One-way ANOVA with Dunnett's multiple comparison's test	NT #4 vs. CPSF6 #5	1	1.595	-0.5952	0.3332	3	3	1.786	10	-0.5952	-1.558 to 0.3679	No	ns	0.281116
Extended Data 2	h	Donor AI	0.02 ng NL4-3	One-way ANOVA with Dunnett's multiple comparison's test	NT #4 vs. CPSF6 #6	1	1.434	-0.4341	0.3332	3	3	1.303	10	-0.4341	-1.397 to 0.5290	No	ns	0.527417
Extended Data 2	h	Donor AI	0.05 ng NL4-3	One-way ANOVA with Dunnett's multiple comparison's test	NT #4 vs. CPSF6 #5	1	1.694	-0.6942	0.3056	3	3	2.272	10	-0.6942	-1.577 to 0.1892	No	ns	0.13542
Extended Data 2	h	Donor AI	0.05 ng NL4-3	One-way ANOVA with Dunnett's multiple comparison's test	NT #4 vs. CPSF6 #6	1	1.804	-0.8035	0.3056	3	3	2.629	10	-0.8035	-1.687 to 0.07979	No	ns	0.0764642
Extended Data 2	h	Donor AI	0.1 ng NL4-3	One-way ANOVA with Dunnett's multiple comparison's test	NT #4 vs. CPSF6 #5	1	1.63	-0.6301	0.3876	3	3	1.626	10	-0.6301	-1.751 to 0.4903	No	ns	0.351411
Extended Data 2	h	Donor AI	0.1 ng NL4-3	One-way ANOVA with Dunnett's multiple comparison's test	NT #4 vs. CPSF6 #6	1	2.103	-1.103	0.3876	3	3	2.846	10	-1.103	-2.224 to 0.01714	No	ns	0.0537371
Extended Data 2	h	Donor AI	0.2 ng NL4-3	One-way ANOVA with Dunnett's multiple comparison's test	NT #4 vs. CPSF6 #5	1	1.515	-0.5149	0.04682	3	3	11	10	-0.5149	-0.6503 to -0.3796	Yes	****	2.3427e-06
Extended Data 2	h	Donor AI	0.2 ng NL4-3	One-way ANOVA with Dunnett's multiple comparison's test	NT #4 vs. CPSF6 #6	1	1.662	-0.6616	0.04682	3	3	14.13	10	-0.6616	-0.7970 to -0.5263	Yes	****	2.208e-07
Extended Data 2	h	Donor AI	0.5 ng NL4-3	One-way ANOVA with Dunnett's multiple comparison's test	NT #4 vs. CPSF6 #5	1	2.037	-1.037	0.3738	3	3	2.775	10	-1.037	-2.118 to 0.04304	No	ns	0.0603262
Extended Data 2	h	Donor AI	0.5 ng NL4-3	One-way ANOVA with Dunnett's multiple comparison's test	NT #4 vs. CPSF6 #6	1	3.374	-2.374	0.3738	3	3	6.35	10	-2.374	-3.454 to -1.293	Yes	***	0.000289178
Extended Data 2	h	Donor AI	1.0 ng NL4-3	One-way ANOVA with Dunnett's multiple comparison's test	NT #4 vs. CPSF6 #5	1	2.105	-1.105	0.1958	3	3	5.644	10	-1.105	-1.671 to -0.5391	Yes	***	0.00073522
Extended Data 2	h	Donor AI	1.0 ng NL4-3	One-way ANOVA with Dunnett's multiple comparison's test	NT #4 vs. CPSF6 #6	1	1.994	-0.9941	0.1958	3	3	5.078	10	-0.9941	-1.560 to -0.4283	Yes	**	0.00162902
Extended Data 2	h	Donor AI	0.02 ng NL4-3 VSV-G	One-way ANOVA with Dunnett's multiple comparison's test	NT #4 vs. CPSF6 #5	1	1.217	-0.2169	0.2986	3	3	0.7265	10	-0.2169	-1.080 to 0.6462	No	ns	0.875889
Extended Data 2	h	Donor AI	0.02 ng NL4-3 VSV-G	One-way ANOVA with Dunnett's multiple comparison's test	NT #4 vs. CPSF6 #6	1	1.187	-0.1871	0.2986	3	3	0.6266	10	-0.1871	-1.050 to 0.6760	No	ns	0.920024
Extended Data 2	h	Donor AI	0.05 ng NL4-3 VSV-G	One-way ANOVA with Dunnett's multiple comparison's test	NT #4 vs. CPSF6 #5	1	1.122	-0.1224	0.1029	3	3	1.19	10	-0.1224	-0.4198 to 0.1750	No	ns	0.597706
Extended Data 2	h	Donor AI	0.05 ng NL4-3 VSV-G	One-way ANOVA with Dunnett's multiple comparison's test	NT #4 vs. CPSF6 #6	1	0.9452	0.05484	0.1029	3	3	0.533	10	0.05484	-0.2425 to 0.3522	No	ns	0.952272
Extended Data 2	h	Donor AI	0.1 ng NL4-3 VSV-G	One-way ANOVA with Dunnett's multiple comparison's test	NT #4 vs. CPSF6 #5	1	1.07	-0.0696	0.0967	3	3	0.7197	10	-0.0696	-0.3491 to 0.2099	No	ns	0.879166
Extended Data 2	h	Donor AI	0.1 ng NL4-3 VSV-G	One-way ANOVA with Dunnett's multiple comparison's test	NT #4 vs. CPSF6 #6	1	1.146	-0.1459	0.0967	3	3	1.509	10	-0.1459	-0.4254 to 0.1336	No	ns	0.409913
Extended Data 2	h	Donor AI	0.2 ng NL4-3 VSV-G	One-way ANOVA with Dunnett's multiple comparison's test	NT #4 vs. CPSF6 #5	1	1.117	-0.1175	0.04121	3	3	2.851	10	-0.1175	-0.2366 to 0.001647	No	ns	0.0533655
Extended Data 2	h	Donor AI	0.2 ng NL4-3 VSV-G	One-way ANOVA with Dunnett's multiple comparison's test	NT #4 vs. CPSF6 #6	1	1.048	-0.04807	0.04121	3	3	1.167	10	-0.04807	-0.1672 to 0.07104	No	ns	0.612327
Extended Data 2	h	Donor AI	0.5 ng NL4-3 VSV-G	One-way ANOVA with Dunnett's multiple comparison's test	NT #4 vs. CPSF6 #5	1	1.169	-0.1693	0.04415	3	3	3.835	10	-0.1693	-0.2969 to -0.04168	Yes	*	0.0108071
Extended Data 2	h	Donor AI	0.5 ng NL4-3 VSV-G	One-way ANOVA with Dunnett's multiple comparison's test	NT #4 vs. CPSF6 #6	1	0.9831	0.01694	0.04415	3	3	0.3838	10	0.01694	-0.1107 to 0.1446	No	ns	0.984686
Extended Data 2	h	Donor AI	1.0 ng NL4-3 VSV-G	One-way ANOVA with Dunnett's multiple comparison's test	NT #4 vs. CPSF6 #5	1	1.188	-0.1881	0.03779	3	3	4.978	10	-0.1881	-0.2973 to -0.07887	Yes	**	0.00188433
Extended Data 2	h	Donor AI	1.0 ng NL4-3 VSV-G	One-way ANOVA with Dunnett's multiple comparison's test	NT #4 vs. CPSF6 #6	1	1.156	-0.156	0.03779	3	3	4.129	10	-0.156	-0.2653 to -0.04682	Yes	**	0.00678815
Extended Data 2	h	Donor AJ	0.02 ng NL4-3	One-way ANOVA with Dunnett's multiple comparison's test	NT #4 vs. CPSF6 #5	1	2.187	-1.187	0.4798	3	3	2.475	10	-1.187	-2.574 to 0.1993	No	ns	0.0980338
Extended Data 2	h	Donor AJ	0.02 ng NL4-3	One-way ANOVA with Dunnett's multiple comparison's test	NT #4 vs. CPSF6 #6	1	2.168	-1.168	0.4798	3	3	2.435	10	-1.168	-2.555 to 0.2186	No	ns	0.104554
Extended Data 2	h	Donor AJ	0.05 ng NL4-3	One-way ANOVA with Dunnett's multiple comparison's test	NT #4 vs. CPSF6 #5	1	3.221	-2.221	0.2889	3	3	7.689	10	-2.221	-3.056 to -1.386	Yes	****	5.82298e-05
Extended Data 2	h	Donor AJ	0.05 ng NL4-3	One-way ANOVA with Dunnett's multiple comparison's test	NT #4 vs. CPSF6 #6	1	2.848	-1.848	0.2889	3	3	6.398	10	-1.848	-2.683 to -1.013	Yes	***	0.00027209
Extended Data 2	h	Donor AJ	0.1 ng NL4-3	One-way ANOVA with Dunnett's multiple comparison's test	NT #4 vs. CPSF6 #5	1	2.145	-1.145	0.1426	3	3	8.031	10	-1.145	-1.557 to -0.7330	Yes	****	3.99261e-05
Extended Data 2	h	Donor AJ	0.1 ng NL4-3	One-way ANOVA with Dunnett's multiple comparison's test	NT #4 vs. CPSF6 #6	1	2.564	-1.564	0.1426	3	3	10.97	10	-1.564	-1.976 to -1.151	Yes	****	2.4046e-06
Extended Data 2	h	Donor AJ	0.2 ng NL4-3	One-way ANOVA with Dunnett's multiple comparison's test	NT #4 vs. CPSF6 #5	1	1.54	-0.5399	0.1144	3	3	4.718	10	-0.5399	-0.8707 to -0.2092	Yes	**	0.00276123
Extended Data 2	h	Donor AJ	0.2 ng NL4-3	One-way ANOVA with Dunnett's multiple comparison's test	NT #4 vs. CPSF6 #6	1	2.013	-1.013	0.1144	3	3	8.849	10	-1.013	-1.343 to -0.6818	Yes	****	1.6957e-05
Extended Data 2	h	Donor AJ	0.5 ng NL4-3	One-way ANOVA with Dunnett's multiple comparison's test	NT #4 vs. CPSF6 #5	1	1.831	-0.8307	0.07044	3	3	11.79	10	-0.8307	-1.034 to -0.6271	Yes	****	1.2213e-06
Extended Data 2	h	Donor AJ	0.5 ng NL4-3	One-way ANOVA with Dunnett's multiple comparison's test	NT #4 vs. CPSF6 #6	1	2.037	-1.037	0.07044	3	3	14.72	10	-1.037	-1.241 to -0.8335	Yes	****	1.49e-07
Extended Data 2	h	Donor AJ	1.0 ng NL4-3	One-way ANOVA with Dunnett's multiple comparison's test	NT #4 vs. CPSF6 #5	1	1.835	-0.8348	0.09345	3	3	8.934	10	-0.8348	-1.105 to -0.5647	Yes	****	1.55823e-05
Extended Data 2	h	Donor AJ	1.0 ng NL4-3	One-way ANOVA with Dunnett's multiple comparison's test	NT #4 vs. CPSF6 #6	1	2.213	-1.213	0.09345	3	3	12.98	10	-1.213	-1.483 to -0.9427	Yes	****	4.952e-07
Extended Data 2	h	Donor AJ	0.02 ng NL4-3 VSV-G	One-way ANOVA with Dunnett's multiple comparison's test	NT #4 vs. CPSF6 #5	1	1.252	-0.2521	0.2336	3	3	1.079	10	-0.2521	-0.9273 to 0.4232	No	ns	0.668368
Extended Data 2	h	Donor AJ	0.02 ng NL4-3 VSV-G	One-way ANOVA with Dunnett's multiple comparison's test	NT #4 vs. CPSF6 #6	1	1.246	-0.2457	0.2336	3	3	1.052	10	-0.2457	-0.9209 to 0.4295	No	ns	0.685783
Extended Data 2	h	Donor AJ	0.05 ng NL4-3 VSV-G	One-way ANOVA with Dunnett's multiple comparison's test	NT #4 vs. CPSF6 #5	1	1.136	-0.1355	0.1584	3	3	0.8559	10	-0.1355	-0.5933 to 0.3222	No	ns	0.806532
Extended Data 2	h	Donor AJ	0.05 ng NL4-3 VSV-G	One-way ANOVA with Dunnett's multiple comparison's test	NT #4 vs. CPSF6 #6	1	0.8508	0.1492	0.1584	3	3	0.9421	10	0.1492	-0.3085 to 0.6069	No	ns	0.754883
Extended Data 2	h	Donor AJ	0.1 ng NL4-3 VSV-G	One-way ANOVA with Dunnett's multiple comparison's test	NT #4 vs. CPSF6 #5	1	1.28	-0.2798	0.1114	3	3	2.512	10	-0.2798	-0.6019 to 0.04219	No	ns	0.0924362
Extended Data 2	h	Donor AJ	0.1 ng NL4-3 VSV-G	One-way ANOVA with Dunnett's multiple comparison's test	NT #4 vs. CPSF6 #6	1	0.9428	0.05722	0.1114	3	3	0.5136	10	0.05722	-0.2648 to 0.3793	No	ns	0.957802
Extended Data 2	h	Donor AJ	0.2 ng NL4-3 VSV-G	One-way ANOVA with Dunnett's multiple comparison's test	NT #4 vs. CPSF6 #5	1	1.259	-0.2593	0.05364	3	3	4.835	10	-0.2593	-0.4144 to -0.1043	Yes	**	0.00232446
Extended Data 2	h	Donor AJ	0.2 ng NL4-3 VSV-G	One-way ANOVA with Dunnett's multiple comparison's test	NT #4 vs. CPSF6 #6	1	0.9877	0.01231	0.05364	3	3	0.2295	10	0.01231	-0.1427 to 0.1674	No	ns	0.997764
Extended Data 2	h	Donor AJ	0.5 ng NL4-3 VSV-G	One-way ANOVA with Dunnett's multiple comparison's test	NT #4 vs. CPSF6 #5	1	1.085	-0.08491	0.09941	3	3	0.8541	10	-0.08491	-0.3723 to 0.2025	No	ns	0.807549
Extended Data 2	h	Donor AJ	0.5 ng NL4-3 VSV-G	One-way ANOVA with Dunnett's multiple comparison's test	NT #4 vs. CPSF6 #6	1	0.9149	0.08515	0.09941	3	3	0.8565	10	0.08515	-0.2022 to 0.3725	No	ns	0.806192
Extended Data 2	h	Donor AJ	1.0 ng NL4-3 VSV-G	One-way ANOVA with Dunnett's multiple comparison's test	NT #4 vs. CPSF6 #5	1	1.215	-0.2153	0.05404	3	3	3.983	10	-0.2153	-0.3715 to -0.05905	Yes	**	0.00853714
Extended Data 2	h	Donor AJ	1.0 ng NL4-3 VSV-G	One-way ANOVA with Dunnett's multiple comparison's test	NT #4 vs. CPSF6 #6	1	0.9794	0.02063	0.05404	3	3	0.3818	10	0.02063	-0.1356 to 0.1768	No	ns	0.984967

## Sheet: Extended Data Fig. 3 Statistics
Row Statistics
Figure	Panel	Sample	Treatment	Guide RNA	Readout	Mean	SD	N
Extended Data 3	a	Donor AK	Media Only	NT #4	Percent HIV-1 Infected Cells (GFP+)	1.4288	0.152221	3
Extended Data 3	a	Donor AK	Media Only	CXCR4	Percent HIV-1 Infected Cells (GFP+)	0.000953667	0.0016518	3
Extended Data 3	a	Donor AK	Media Only	CYPA #3	Percent HIV-1 Infected Cells (GFP+)	0.109534	0.0377159	3
Extended Data 3	a	Donor AK	Media Only	IFNAR1	Percent HIV-1 Infected Cells (GFP+)	3.90268	0.487399	3
Extended Data 3	a	Donor AK	Media Only	CPSF6 #5	Percent HIV-1 Infected Cells (GFP+)	6.02175	1.17494	3
Extended Data 3	a	Donor AK	Media Only	CPSF6 #6	Percent HIV-1 Infected Cells (GFP+)	10.2766	1.6153	3
Extended Data 3	a	Donor AK	IFNα	NT #4	Percent HIV-1 Infected Cells (GFP+)	0.075204	0.00554194	3
Extended Data 3	a	Donor AK	IFNα	CXCR4	Percent HIV-1 Infected Cells (GFP+)	0.001464	0.0014782	3
Extended Data 3	a	Donor AK	IFNα	CYPA #3	Percent HIV-1 Infected Cells (GFP+)	0.006598	0.00112433	3
Extended Data 3	a	Donor AK	IFNα	IFNAR1	Percent HIV-1 Infected Cells (GFP+)	4.12961	0.170081	3
Extended Data 3	a	Donor AK	IFNα	CPSF6 #5	Percent HIV-1 Infected Cells (GFP+)	0.704113	0.0349572	3
Extended Data 3	a	Donor AK	IFNα	CPSF6 #6	Percent HIV-1 Infected Cells (GFP+)	1.41737	0.027102	3
Extended Data 3	a	Donor AK	IFNβ	NT #4	Percent HIV-1 Infected Cells (GFP+)	0.132651	0.0243922	3
Extended Data 3	a	Donor AK	IFNβ	CXCR4	Percent HIV-1 Infected Cells (GFP+)	0.000488667	0.000846395	3
Extended Data 3	a	Donor AK	IFNβ	CYPA #3	Percent HIV-1 Infected Cells (GFP+)	0.00894	0.00356703	3
Extended Data 3	a	Donor AK	IFNβ	IFNAR1	Percent HIV-1 Infected Cells (GFP+)	4.16032	0.413624	3
Extended Data 3	a	Donor AK	IFNβ	CPSF6 #5	Percent HIV-1 Infected Cells (GFP+)	1.42661	0.0727648	3
Extended Data 3	a	Donor AK	IFNβ	CPSF6 #6	Percent HIV-1 Infected Cells (GFP+)	2.97117	0.216093	3
Extended Data 3	a	Donor AK	Universal Type I IFN	NT #4	Percent HIV-1 Infected Cells (GFP+)	0.0622223	0.00325545	3
Extended Data 3	a	Donor AK	Universal Type I IFN	CXCR4	Percent HIV-1 Infected Cells (GFP+)	0.00107033	0.000927777	3
Extended Data 3	a	Donor AK	Universal Type I IFN	CYPA #3	Percent HIV-1 Infected Cells (GFP+)	0.0115237	0.00360611	3
Extended Data 3	a	Donor AK	Universal Type I IFN	IFNAR1	Percent HIV-1 Infected Cells (GFP+)	3.49091	0.105919	3
Extended Data 3	a	Donor AK	Universal Type I IFN	CPSF6 #5	Percent HIV-1 Infected Cells (GFP+)	0.435525	0.0435246	3
Extended Data 3	a	Donor AK	Universal Type I IFN	CPSF6 #6	Percent HIV-1 Infected Cells (GFP+)	0.768982	0.0662616	3
Extended Data 3	a	Donor AK	IFNγ	NT #4	Percent HIV-1 Infected Cells (GFP+)	1.4161	0.206046	3
Extended Data 3	a	Donor AK	IFNγ	CXCR4	Percent HIV-1 Infected Cells (GFP+)	0.002256	0.00275261	3
Extended Data 3	a	Donor AK	IFNγ	CYPA #3	Percent HIV-1 Infected Cells (GFP+)	0.126653	0.011249	3
Extended Data 3	a	Donor AK	IFNγ	IFNAR1	Percent HIV-1 Infected Cells (GFP+)	4.05049	0.578532	3
Extended Data 3	a	Donor AK	IFNγ	CPSF6 #5	Percent HIV-1 Infected Cells (GFP+)	6.11652	0.564984	3
Extended Data 3	a	Donor AK	IFNγ	CPSF6 #6	Percent HIV-1 Infected Cells (GFP+)	10.4667	2.52994	3
Significance Tests
Figure	Panel	Sample	Treatment	Test	Comparison	Mean 1	Mean 2	Mean Diff.	SE of diff.	n1	n2	q	DF	Mean Diff.	95.00% CI of diff.	Below threshold? (Alpha = 0.05)	Summary	Adjusted P Value
Extended Data 3	a	Donor AK	Media Only	One-way ANOVA with Dunnett's multiple comparison's test	NT #4 vs. IFNAR1	1.429	3.903	-2.474	0.6873	3	3	3.599	12	-2.474	-4.468 to -0.4797	Yes	*	0.0145303
Extended Data 3	a	Donor AK	Media Only	One-way ANOVA with Dunnett's multiple comparison's test	NT #4 vs. CPSF6 #5	1.429	6.022	-4.593	0.6873	3	3	6.682	12	-4.593	-6.587 to -2.599	Yes	****	9.80151e-05
Extended Data 3	a	Donor AK	Media Only	One-way ANOVA with Dunnett's multiple comparison's test	NT #4 vs. CPSF6 #6	1.429	10.28	-8.848	0.6873	3	3	12.87	12	-8.848	-10.84 to -6.854	Yes	****	9.88e-08
Extended Data 3	a	Donor AK	IFNα	One-way ANOVA with Dunnett's multiple comparison's test	NT #4 vs. IFNAR1	0.0752	4.13	-4.054	0.05861	3	3	69.17	12	-4.054	-4.224 to -3.884	Yes	****	<0.0000000001
Extended Data 3	a	Donor AK	IFNα	One-way ANOVA with Dunnett's multiple comparison's test	NT #4 vs. CPSF6 #5	0.0752	0.7041	-0.6289	0.05861	3	3	10.73	12	-0.6289	-0.7990 to -0.4589	Yes	****	7.421e-07
Extended Data 3	a	Donor AK	IFNα	One-way ANOVA with Dunnett's multiple comparison's test	NT #4 vs. CPSF6 #6	0.0752	1.417	-1.342	0.05861	3	3	22.9	12	-1.342	-1.512 to -1.172	Yes	****	1e-10
Extended Data 3	a	Donor AK	IFNβ	One-way ANOVA with Dunnett's multiple comparison's test	NT #4 vs. IFNAR1	0.1327	4.16	-4.028	0.1577	3	3	25.55	12	-4.028	-4.485 to -3.570	Yes	****	<0.0000000001
Extended Data 3	a	Donor AK	IFNβ	One-way ANOVA with Dunnett's multiple comparison's test	NT #4 vs. CPSF6 #5	0.1327	1.427	-1.294	0.1577	3	3	8.208	12	-1.294	-1.751 to -0.8366	Yes	****	1.27415e-05
Extended Data 3	a	Donor AK	IFNβ	One-way ANOVA with Dunnett's multiple comparison's test	NT #4 vs. CPSF6 #6	0.1327	2.971	-2.839	0.1577	3	3	18.01	12	-2.839	-3.296 to -2.381	Yes	****	2.1e-09
Extended Data 3	a	Donor AK	Universal Type I IFN	One-way ANOVA with Dunnett's multiple comparison's test	NT #4 vs. IFNAR1	0.06222	3.491	-3.429	0.04413	3	3	77.69	12	-3.429	-3.557 to -3.301	Yes	****	<0.0000000001
Extended Data 3	a	Donor AK	Universal Type I IFN	One-way ANOVA with Dunnett's multiple comparison's test	NT #4 vs. CPSF6 #5	0.06222	0.4355	-0.3733	0.04413	3	3	8.459	12	-0.3733	-0.5013 to -0.2453	Yes	****	9.3408e-06
Extended Data 3	a	Donor AK	Universal Type I IFN	One-way ANOVA with Dunnett's multiple comparison's test	NT #4 vs. CPSF6 #6	0.06222	0.769	-0.7068	0.04413	3	3	16.01	12	-0.7068	-0.8348 to -0.5787	Yes	****	8.3e-09
Extended Data 3	a	Donor AK	IFNγ	One-way ANOVA with Dunnett's multiple comparison's test	NT #4 vs. IFNAR1	1.416	4.05	-2.634	0.888	3	3	2.967	12	-2.634	-5.211 to -0.05799	Yes	*	0.0445752
Extended Data 3	a	Donor AK	IFNγ	One-way ANOVA with Dunnett's multiple comparison's test	NT #4 vs. CPSF6 #5	1.416	6.117	-4.7	0.888	3	3	5.293	12	-4.7	-7.277 to -2.124	Yes	***	0.000809581
Extended Data 3	a	Donor AK	IFNγ	One-way ANOVA with Dunnett's multiple comparison's test	NT #4 vs. CPSF6 #6	1.416	10.47	-9.051	0.888	3	3	10.19	12	-9.051	-11.63 to -6.474	Yes	****	1.2978e-06

## Sheet: Extended Data Fig. 4 Statistics
Row Statistics
Figure	Panel	Sample	Treatment	Guide RNA	Readout	Mean	SD	N
S4	d	Donors U-W	n/a	NT #4	Ghost Red Viability Stain, Percent viable cells (Ghost red-)	91.1479	1.88884	3
S4	d	Donors U-W	n/a	CXCR4	Ghost Red Viability Stain, Percent viable cells (Ghost red-)	90.717	2.53406	3
S4	d	Donors U-W	n/a	CYPA #3	Ghost Red Viability Stain, Percent viable cells (Ghost red-)	90.9879	1.80367	3
S4	d	Donors U-W	n/a	CPSF5 #3	Ghost Red Viability Stain, Percent viable cells (Ghost red-)	87.8656	3.52917	3
S4	d	Donors U-W	n/a	CPSF5 #12	Ghost Red Viability Stain, Percent viable cells (Ghost red-)	87.7068	5.94232	3
Significance Tests
Figure	Panel	Sample	Treatment	Test	Comparison	Mean 1	Mean 2	Mean Diff.	SE of diff.	n1	n2	q	DF	Mean Diff.	95.00% CI of diff.	Below threshold? (Alpha = 0.05)	Summary	Adjusted P Value
S4	d	Donors U-W	n/a	Two-way ANOVA with Dunnett's multiple comparison's test	NT #4 vs. CXCR4	91.15	90.72	0.4309	1.537	3	3	0.2804	8	0.4309	-4.215 to 5.077	No	ns	0.995042
S4	d	Donors U-W	n/a	Two-way ANOVA with Dunnett's multiple comparison's test	NT #4 vs. CYPA #3	91.15	90.99	0.1601	1.537	3	3	0.1041	8	0.1601	-4.486 to 4.806	No	ns	0.999895
S4	d	Donors U-W	n/a	Two-way ANOVA with Dunnett's multiple comparison's test	NT #4 vs. CPSF5 #3	91.15	87.87	3.282	1.537	3	3	2.136	8	3.282	-1.364 to 7.928	No	ns	0.181538
S4	d	Donors U-W	n/a	Two-way ANOVA with Dunnett's multiple comparison's test	NT #4 vs. CPSF5 #12	91.15	87.71	3.441	1.537	3	3	2.239	8	3.441	-1.205 to 8.087	No	ns	0.156636

## Sheet: Extended Data Fig. 5 Statistics
Row Statistics
Figure	Panel	Sample	Treatment	Guide RNA	Readout	Mean	SD	N
Extended Data 5		Donor M	N74D Capsid Mutant	NT #4	Fold Change in HIV-1 Infected Cells (GFP+) Normalized to Non-Targeting per condition	1	0.204901	3
Extended Data 5		Donor M	N74D Capsid Mutant	CYPA #3	Fold Change in HIV-1 Infected Cells (GFP+) Normalized to Non-Targeting per condition	0.138223	0.0256846	3
Extended Data 5		Donor M	N74D Capsid Mutant	CPSF6 #5	Fold Change in HIV-1 Infected Cells (GFP+) Normalized to Non-Targeting per condition	3.394	0.879279	3
Extended Data 5		Donor M	N74D Capsid Mutant	CPSF6 #6	Fold Change in HIV-1 Infected Cells (GFP+) Normalized to Non-Targeting per condition	2.57084	0.546278	3
Extended Data 5		Donor M	N74D Capsid Mutant	TRIM5α #6	Fold Change in HIV-1 Infected Cells (GFP+) Normalized to Non-Targeting per condition	1.38407	0.180693	3
Extended Data 5		Donor M	N74D Capsid Mutant	TRIM5α #7	Fold Change in HIV-1 Infected Cells (GFP+) Normalized to Non-Targeting per condition	2.55742	0.028165	3
Extended Data 5		Donor N	N74D Capsid Mutant	NT #4	Fold Change in HIV-1 Infected Cells (GFP+) Normalized to Non-Targeting per condition	1	0.170541	3
Extended Data 5		Donor N	N74D Capsid Mutant	CYPA #3	Fold Change in HIV-1 Infected Cells (GFP+) Normalized to Non-Targeting per condition	0.15838	0.0300725	3
Extended Data 5		Donor N	N74D Capsid Mutant	CPSF6 #5	Fold Change in HIV-1 Infected Cells (GFP+) Normalized to Non-Targeting per condition	4.4514	0.76822	3
Extended Data 5		Donor N	N74D Capsid Mutant	CPSF6 #6	Fold Change in HIV-1 Infected Cells (GFP+) Normalized to Non-Targeting per condition	3.19359	0.235492	3
Extended Data 5		Donor N	N74D Capsid Mutant	TRIM5α #6	Fold Change in HIV-1 Infected Cells (GFP+) Normalized to Non-Targeting per condition	2.48549	0.0865948	3
Extended Data 5		Donor N	N74D Capsid Mutant	TRIM5α #7	Fold Change in HIV-1 Infected Cells (GFP+) Normalized to Non-Targeting per condition	4.46738	0.195153	3
Extended Data 5		Donor O	N74D Capsid Mutant	NT #4	Fold Change in HIV-1 Infected Cells (GFP+) Normalized to Non-Targeting per condition	1	0.130804	3
Extended Data 5		Donor O	N74D Capsid Mutant	CYPA #3	Fold Change in HIV-1 Infected Cells (GFP+) Normalized to Non-Targeting per condition	0.195058	0.0134651	3
Extended Data 5		Donor O	N74D Capsid Mutant	CPSF6 #5	Fold Change in HIV-1 Infected Cells (GFP+) Normalized to Non-Targeting per condition	3.17792	0.177559	3
Extended Data 5		Donor O	N74D Capsid Mutant	CPSF6 #6	Fold Change in HIV-1 Infected Cells (GFP+) Normalized to Non-Targeting per condition	2.59302	0.246723	3
Extended Data 5		Donor O	N74D Capsid Mutant	TRIM5α #6	Fold Change in HIV-1 Infected Cells (GFP+) Normalized to Non-Targeting per condition	1.77422	0.166892	3
Extended Data 5		Donor O	N74D Capsid Mutant	TRIM5α #7	Fold Change in HIV-1 Infected Cells (GFP+) Normalized to Non-Targeting per condition	3.06679	0.0533663	3
Extended Data 5		Donor P	N74D Capsid Mutant	NT #4	Fold Change in HIV-1 Infected Cells (GFP+) Normalized to Non-Targeting per condition	1	0.055164	3
Extended Data 5		Donor P	N74D Capsid Mutant	CYPA #3	Fold Change in HIV-1 Infected Cells (GFP+) Normalized to Non-Targeting per condition	0.0944707	0.0123095	3
Extended Data 5		Donor P	N74D Capsid Mutant	CPSF6 #5	Fold Change in HIV-1 Infected Cells (GFP+) Normalized to Non-Targeting per condition	5.95288	0.544382	3
Extended Data 5		Donor P	N74D Capsid Mutant	CPSF6 #6	Fold Change in HIV-1 Infected Cells (GFP+) Normalized to Non-Targeting per condition	2.09277	0.515248	3
Extended Data 5		Donor P	N74D Capsid Mutant	TRIM5α #6	Fold Change in HIV-1 Infected Cells (GFP+) Normalized to Non-Targeting per condition	2.02063	0.0348109	3
Extended Data 5		Donor P	N74D Capsid Mutant	TRIM5α #7	Fold Change in HIV-1 Infected Cells (GFP+) Normalized to Non-Targeting per condition	4.6291	0.993704	3
Extended Data 5		Donor Q	N74D Capsid Mutant	NT #4	Fold Change in HIV-1 Infected Cells (GFP+) Normalized to Non-Targeting per condition	1	0.0602224	3
Extended Data 5		Donor Q	N74D Capsid Mutant	CYPA #3	Fold Change in HIV-1 Infected Cells (GFP+) Normalized to Non-Targeting per condition	0.0810317	0.0189683	3
Extended Data 5		Donor Q	N74D Capsid Mutant	CPSF6 #5	Fold Change in HIV-1 Infected Cells (GFP+) Normalized to Non-Targeting per condition	5.95298	0.68077	3
Extended Data 5		Donor Q	N74D Capsid Mutant	CPSF6 #6	Fold Change in HIV-1 Infected Cells (GFP+) Normalized to Non-Targeting per condition	2.9814	0.394349	3
Extended Data 5		Donor Q	N74D Capsid Mutant	TRIM5α #6	Fold Change in HIV-1 Infected Cells (GFP+) Normalized to Non-Targeting per condition	2.59216	0.390037	3
Extended Data 5		Donor Q	N74D Capsid Mutant	TRIM5α #7	Fold Change in HIV-1 Infected Cells (GFP+) Normalized to Non-Targeting per condition	7.6858	1.34187	3
Significance Tests
Figure	Panel	Sample	Treatment	Test	Comparison	Mean 1	Mean 2	Mean Diff.	SE of diff.	n1	n2	q	DF	Mean Diff.	95.00% CI of diff.	Below threshold? (Alpha = 0.05)	Summary	Adjusted P Value
Extended Data 5		Donor M	N74D Capsid Mutant	CPSF6 #5	One-way ANOVA with Dunnett's multiple comparison's test	1	3.394	-2.394	0.3571	3	3	6.704	12	-2.394	-3.430 to -1.358	Yes	****	9.50033e-05
Extended Data 5		Donor M	N74D Capsid Mutant	CPSF6 #6	One-way ANOVA with Dunnett's multiple comparison's test	1	2.571	-1.571	0.3571	3	3	4.399	12	-1.571	-2.607 to -0.5348	Yes	**	0.00358893
Extended Data 5		Donor M	N74D Capsid Mutant	TRIM5α #6	One-way ANOVA with Dunnett's multiple comparison's test	1	1.384	-0.3841	0.3571	3	3	1.076	12	-0.3841	-1.420 to 0.6520	No	ns	0.727358
Extended Data 5		Donor M	N74D Capsid Mutant	TRIM5α #7	One-way ANOVA with Dunnett's multiple comparison's test	1	2.557	-1.557	0.3571	3	3	4.361	12	-1.557	-2.593 to -0.5214	Yes	**	0.0038282
Extended Data 5		Donor N	N74D Capsid Mutant	CPSF6 #5	One-way ANOVA with Dunnett's multiple comparison's test	1	4.451	-3.451	0.2831	3	3	12.19	12	-3.451	-4.273 to -2.630	Yes	****	1.813e-07
Extended Data 5		Donor N	N74D Capsid Mutant	CPSF6 #6	One-way ANOVA with Dunnett's multiple comparison's test	1	3.194	-2.194	0.2831	3	3	7.749	12	-2.194	-3.015 to -1.372	Yes	****	2.28669e-05
Extended Data 5		Donor N	N74D Capsid Mutant	TRIM5α #6	One-way ANOVA with Dunnett's multiple comparison's test	1	2.485	-1.485	0.2831	3	3	5.248	12	-1.485	-2.307 to -0.6642	Yes	***	0.000871296
Extended Data 5		Donor N	N74D Capsid Mutant	TRIM5α #7	One-way ANOVA with Dunnett's multiple comparison's test	1	4.467	-3.467	0.2831	3	3	12.25	12	-3.467	-4.289 to -2.646	Yes	****	1.722e-07
Extended Data 5		Donor O	N74D Capsid Mutant	CPSF6 #5	One-way ANOVA with Dunnett's multiple comparison's test	1	3.178	-2.178	0.1249	3	3	17.44	12	-2.178	-2.540 to -1.816	Yes	****	3.1e-09
Extended Data 5		Donor O	N74D Capsid Mutant	CPSF6 #6	One-way ANOVA with Dunnett's multiple comparison's test	1	2.593	-1.593	0.1249	3	3	12.75	12	-1.593	-1.955 to -1.231	Yes	****	1.095e-07
Extended Data 5		Donor O	N74D Capsid Mutant	TRIM5α #6	One-way ANOVA with Dunnett's multiple comparison's test	1	1.774	-0.7742	0.1249	3	3	6.199	12	-0.7742	-1.137 to -0.4119	Yes	***	0.0001986
Extended Data 5		Donor O	N74D Capsid Mutant	TRIM5α #7	One-way ANOVA with Dunnett's multiple comparison's test	1	3.067	-2.067	0.1249	3	3	16.55	12	-2.067	-2.429 to -1.704	Yes	****	5.7e-09
Extended Data 5		Donor P	N74D Capsid Mutant	CPSF6 #5	One-way ANOVA with Dunnett's multiple comparison's test	1	5.953	-4.953	0.4155	3	3	11.92	12	-4.953	-6.158 to -3.747	Yes	****	2.329e-07
Extended Data 5		Donor P	N74D Capsid Mutant	CPSF6 #6	One-way ANOVA with Dunnett's multiple comparison's test	1	2.093	-1.093	0.4155	3	3	2.63	12	-1.093	-2.298 to 0.1127	No	ns	0.0801086
Extended Data 5		Donor P	N74D Capsid Mutant	TRIM5α #6	One-way ANOVA with Dunnett's multiple comparison's test	1	2.021	-1.021	0.4155	3	3	2.456	12	-1.021	-2.226 to 0.1848	No	ns	0.107665
Extended Data 5		Donor P	N74D Capsid Mutant	TRIM5α #7	One-way ANOVA with Dunnett's multiple comparison's test	1	4.629	-3.629	0.4155	3	3	8.735	12	-3.629	-4.835 to -2.424	Yes	****	6.6934e-06
Extended Data 5		Donor Q	N74D Capsid Mutant	CPSF6 #5	One-way ANOVA with Dunnett's multiple comparison's test	1	5.953	-4.953	0.535	3	3	9.259	12	-4.953	-6.505 to -3.401	Yes	****	3.6278e-06
Extended Data 5		Donor Q	N74D Capsid Mutant	CPSF6 #6	One-way ANOVA with Dunnett's multiple comparison's test	1	2.981	-1.981	0.535	3	3	3.704	12	-1.981	-3.534 to -0.4293	Yes	*	0.0120751
Extended Data 5		Donor Q	N74D Capsid Mutant	TRIM5α #6	One-way ANOVA with Dunnett's multiple comparison's test	1	2.592	-1.592	0.535	3	3	2.976	12	-1.592	-3.144 to -0.04005	Yes	*	0.0438303
Extended Data 5		Donor Q	N74D Capsid Mutant	TRIM5α #7	One-way ANOVA with Dunnett's multiple comparison's test	1	7.686	-6.686	0.535	3	3	12.5	12	-6.686	-8.238 to -5.134	Yes	****	1.375e-07
