# Supplementary material for: Disruption of CPSF6 enhances cellular permissivity to HIV-1 infection through alternative polyadenylation
Source: Research Square preprint supplement (doi:10.21203/rs.3.rs-5099896/v1), 2024-12-04
Supplement: Supplementary file 2 [file 383f93873b99a56e9de10a57.xlsx]

## Sheet: Figure 2
Gene Name	baseMean	log2FoldChange	lfcSE	stat	pvalue	padj	Figure	Donor	Condition
RP11-181G12.2	108.03	0.355788	0.278289	1.27848	0.201079	0.378103	2	E-G	CPSF6 Knock-out
KCNH6	8.07891	-0.830305	0.888639	-0.934356	0.35012	0.55317	2	E-G	CPSF6 Knock-out
PRR13P5	859.892	-0.0657282	0.0711695	-0.923544	0.355724	0.559025	2	E-G	CPSF6 Knock-out
LARP4	8821.14	-0.132009	0.0721324	-1.8301	0.0672353	0.166445	2	E-G	CPSF6 Knock-out
ANXA6	40308.2	0.266289	0.0541032	4.92187	8.57206e-07	7.73494e-06	2	E-G	CPSF6 Knock-out
WARS2	1533.98	0.136378	0.0806018	1.692	0.090646	0.20998	2	E-G	CPSF6 Knock-out
PBRM1	15137.4	0.193278	0.058188	3.32162	0.000894967	0.00429415	2	E-G	CPSF6 Knock-out
KCNK7	148.743	-0.540702	0.225768	-2.39494	0.016623	0.0540346	2	E-G	CPSF6 Knock-out
RP11-15A1.8	17.9913	-1.28982	0.746672	-1.72742	0.0840916	0.198232	2	E-G	CPSF6 Knock-out
E2F8	6861.68	0.111687	0.0486283	2.29675	0.0216328	0.0670295	2	E-G	CPSF6 Knock-out
NRBF2P5	104.573	-0.358597	0.227594	-1.5756	0.115119	0.252434	2	E-G	CPSF6 Knock-out
CFAP58-AS1	27.4454	-0.212694	0.439968	-0.483431	0.62879	0.788753	2	E-G	CPSF6 Knock-out
AL355598.1	17.7302	-0.387103	0.464962	-0.832548	0.4051	0.607996	2	E-G	CPSF6 Knock-out
RPP40	293.901	0.218145	0.181113	1.20447	0.228407	0.413211	2	E-G	CPSF6 Knock-out
LPP-AS2	266.228	0.345657	0.147024	2.35102	0.0187218	0.0595891	2	E-G	CPSF6 Knock-out
RNU5E-1	16.8365	0.643858	0.503172	1.2796	0.200686	0.377709	2	E-G	CPSF6 Knock-out
RPS6KA3	16073.9	-0.615551	0.0515319	-11.945	6.89208e-33	8.32673e-31	2	E-G	CPSF6 Knock-out
MIR5192	18.8596	-0.358878	0.577617	-0.621307	0.534398	0.719046	2	E-G	CPSF6 Knock-out
RP11-567O18.1	51.9163	-0.371401	0.41679	-0.891097	0.372877	0.576493	2	E-G	CPSF6 Knock-out
APOA1-AS	39.4807	-0.363502	0.306577	-1.18568	0.235749	0.422155	2	E-G	CPSF6 Knock-out
MAPRE1	16270.1	-0.235788	0.0728966	-3.23455	0.00121833	0.00565222	2	E-G	CPSF6 Knock-out
CUZD1	431.221	-0.0453202	0.136692	-0.33155	0.740229	0.862904	2	E-G	CPSF6 Knock-out
TMEM64	2960.91	0.0746614	0.0729153	1.02395	0.30586	0.505356	2	E-G	CPSF6 Knock-out
ARHGEF34P	1619.52	0.920541	0.0770927	11.9407	7.2608e-33	8.73565e-31	2	E-G	CPSF6 Knock-out
RHPN1-AS1	50.3146	-0.18022	0.367425	-0.490494	0.623785	0.784964	2	E-G	CPSF6 Knock-out
CTD-3126B10.5	205.253	0.104207	0.204558	0.509427	0.610453	0.774534	2	E-G	CPSF6 Knock-out
EIF4HP2	83.2546	-0.348761	0.268522	-1.29882	0.194007	0.36901	2	E-G	CPSF6 Knock-out
JADE1	6399.88	-0.0139739	0.0480655	-0.290727	0.77126	0.881776	2	E-G	CPSF6 Knock-out
CYB5R2	1154.38	0.230792	0.104441	2.20979	0.02712	0.0804468	2	E-G	CPSF6 Knock-out
ZC3HAV1	33374.8	-0.185677	0.0299644	-6.19659	5.76993e-10	8.41873e-09	2	E-G	CPSF6 Knock-out
TNFRSF11A	6152.17	0.543765	0.0509594	10.6706	1.39772e-26	9.96521e-25	2	E-G	CPSF6 Knock-out
ARF3	13880.2	0.153886	0.0630989	2.43881	0.0147358	0.0488346	2	E-G	CPSF6 Knock-out
SLC25A25-AS1	1091.67	-0.792248	0.111334	-7.11596	1.11134e-12	2.2551e-11	2	E-G	CPSF6 Knock-out
RP11-134O21.1	38.9429	0.490474	0.567895	0.863671	0.387769	0.591798	2	E-G	CPSF6 Knock-out
MIR4489	20.9566	-0.523041	0.507075	-1.03148	0.302314	0.501281	2	E-G	CPSF6 Knock-out
CTB-36H16.2	67.2013	-0.961703	0.310341	-3.09885	0.00194271	0.00854857	2	E-G	CPSF6 Knock-out
GMEB2	3268.32	-0.163469	0.0687707	-2.37702	0.0174531	0.0561952	2	E-G	CPSF6 Knock-out
TRAK2	8872.34	-0.225707	0.0553639	-4.07679	4.56623e-05	0.000294637	2	E-G	CPSF6 Knock-out
PVT1_1	16.0582	0.333192	0.749849	0.444345	0.656793	0.808289	2	E-G	CPSF6 Knock-out
PRDX3P1	145.969	-0.105554	0.189736	-0.556318	0.577993	0.751241	2	E-G	CPSF6 Knock-out
RP11-85B7.4	10.9985	1.3079	1.02229	1.27939	0.200761	0.377776	2	E-G	CPSF6 Knock-out
RNU6-1321P	5.1928	-0.502599	0.879641	-0.571369	0.56775	0.743414	2	E-G	CPSF6 Knock-out
COX6CP13	6.23971	0.329824	1.06179	0.310629	0.756082	0.872421	2	E-G	CPSF6 Knock-out
CICP16	142.393	-0.587502	0.248404	-2.3651	0.018025	0.0577569	2	E-G	CPSF6 Knock-out
RP11-152N13.5	196.368	0.218025	0.197711	1.10275	0.270137	0.464451	2	E-G	CPSF6 Knock-out
RP3-326I13.1	2.45706	1.14131	2.76499	0.412773	0.679773	0.824458	2	E-G	CPSF6 Knock-out
RP11-427J23.1	30.1996	0.924403	0.500749	1.84604	0.0648865	0.161852	2	E-G	CPSF6 Knock-out
RP11-468E2.1	53.1085	-0.417482	1.65601	-0.252102	0.800963	0.899839	2	E-G	CPSF6 Knock-out
IRAK2	717.367	0.726291	0.124872	5.81627	6.01738e-09	7.6408e-08	2	E-G	CPSF6 Knock-out
KCNC4-AS1	41.0331	-0.137275	0.385577	-0.356025	0.721822	0.851915	2	E-G	CPSF6 Knock-out
ZNF24	12669.5	-0.0523772	0.0485884	-1.07798	0.281044	0.477305	2	E-G	CPSF6 Knock-out
SLC26A7	16.9362	0.147849	0.744061	0.198705	0.842493	0.923363	2	E-G	CPSF6 Knock-out
RP11-259G18.2	160.577	-0.110212	0.197826	-0.557114	0.577449	0.750871	2	E-G	CPSF6 Knock-out
ALDH16A1	2524.84	-0.466574	0.0874159	-5.33741	9.42856e-08	1.00165e-06	2	E-G	CPSF6 Knock-out
RP11-667K14.4	102.193	0.432349	0.348247	1.2415	0.21442	0.395085	2	E-G	CPSF6 Knock-out
CTD-3032J10.4	55.8797	-0.437698	0.300517	-1.45649	0.145258	0.299574	2	E-G	CPSF6 Knock-out
CTD-2377O17.1	6.38856	1.36661	0.973578	1.4037	0.160408	0.321986	2	E-G	CPSF6 Knock-out
IRF4	163475	0.369621	0.0890875	4.14897	3.33975e-05	0.000221538	2	E-G	CPSF6 Knock-out
RP1-159A19.4	62.046	0.278058	0.288607	0.96345	0.335322	0.538271	2	E-G	CPSF6 Knock-out
ZNF850	2880.45	0.122679	0.0815839	1.50372	0.132653	0.280366	2	E-G	CPSF6 Knock-out
PKD1P5	7695.36	0.0770991	0.0641211	1.2024	0.229209	0.414243	2	E-G	CPSF6 Knock-out
ST8SIA1	149.245	-0.607509	0.183554	-3.3097	0.000933952	0.00446118	2	E-G	CPSF6 Knock-out
RP5-1142A6.2	777.157	0.243197	0.255416	0.952162	0.341015	0.543632	2	E-G	CPSF6 Knock-out
SNORA42	9.26955	-0.360142	0.843432	-0.426996	0.669383	0.816717	2	E-G	CPSF6 Knock-out
RP11-381E24.1	213.618	-1.37694	0.227754	-6.04575	1.48719e-09	2.04977e-08	2	E-G	CPSF6 Knock-out
EAPP	3237.66	0.235693	0.0806105	2.92385	0.00345735	0.0140944	2	E-G	CPSF6 Knock-out
POLG2	1535.56	-0.298862	0.0947989	-3.15259	0.00161827	0.00727276	2	E-G	CPSF6 Knock-out
DTD1	2334.61	-0.103237	0.0842777	-1.22496	0.22059	0.403288	2	E-G	CPSF6 Knock-out
RP11-213G2.3	447.57	0.155166	0.135663	1.14376	0.252725	0.443397	2	E-G	CPSF6 Knock-out
VAPB	5178.13	0.0727317	0.0522345	1.39241	0.163799	0.327022	2	E-G	CPSF6 Knock-out
RNU4-21P	7.63249	-1.01717	0.783405	-1.29839	0.194153	0.369192	2	E-G	CPSF6 Knock-out
AC062028.1	4.37757	-0.138543	1.46975	-0.0942635	0.9249	0.964516	2	E-G	CPSF6 Knock-out
TULP4	6124.12	0.113098	0.0634031	1.78379	0.0744575	0.180381	2	E-G	CPSF6 Knock-out
Y_RNA	9.97218	-1.29242	0.771628	-1.67493	0.0939489	0.215969	2	E-G	CPSF6 Knock-out
HSH2D	2583.01	-0.161062	0.055239	-2.91573	0.00354862	0.0144319	2	E-G	CPSF6 Knock-out
CTD-2102P23.1	94.938	-0.112987	0.318496	-0.354753	0.722775	0.852464	2	E-G	CPSF6 Knock-out
SLC25A3P2	22.5271	-1.23831	0.568321	-2.1789	0.0293393	0.0857374	2	E-G	CPSF6 Knock-out
RAC2	61232.5	0.244411	0.0573488	4.26182	2.02765e-05	0.000140437	2	E-G	CPSF6 Knock-out
DCXR	2756.91	0.125222	0.0890691	1.4059	0.159754	0.321072	2	E-G	CPSF6 Knock-out
NCKAP1L	35087.9	-0.02422	0.0409934	-0.590826	0.554637	0.734055	2	E-G	CPSF6 Knock-out
ZMAT2	5308.88	0.0015859	0.0620365	0.025564	0.979605	0.990698	2	E-G	CPSF6 Knock-out
MED12L	717.582	0.769363	0.094105	8.17557	2.9446e-16	8.90317e-15	2	E-G	CPSF6 Knock-out
ERRFI1	512.343	1.89695	0.413723	4.58506	4.53863e-06	3.57384e-05	2	E-G	CPSF6 Knock-out
RP11-173D3.4	10.053	1.06655	0.73291	1.45523	0.145606	0.300112	2	E-G	CPSF6 Knock-out
KIAA0141	5472.96	-0.124603	0.0414611	-3.00531	0.00265314	0.0111953	2	E-G	CPSF6 Knock-out
MUL1	1984.18	0.281127	0.0737078	3.81407	0.000136695	0.000797068	2	E-G	CPSF6 Knock-out
KIAA2026	7151.49	0.157172	0.0595884	2.63763	0.00834868	0.0301072	2	E-G	CPSF6 Knock-out
C12orf50	6.73602	0.428107	0.830632	0.5154	0.606274	0.771479	2	E-G	CPSF6 Knock-out
MAGIX	111.616	0.278588	0.220728	1.26213	0.2069	0.385709	2	E-G	CPSF6 Knock-out
CHORDC1	5422.78	0.161891	0.0514178	3.14853	0.00164094	0.0073629	2	E-G	CPSF6 Knock-out
RWDD2B	775.786	-0.536892	0.103595	-5.1826	2.18817e-07	2.19539e-06	2	E-G	CPSF6 Knock-out
GPR22	106.676	-0.0158544	0.331833	-0.0477782	0.961893	0.982478	2	E-G	CPSF6 Knock-out
AP2A2	5662.89	0.221187	0.0534385	4.13909	3.4868e-05	0.000230339	2	E-G	CPSF6 Knock-out
TRGV5	223.846	-0.173777	0.21392	-0.812346	0.416593	0.618794	2	E-G	CPSF6 Knock-out
RP11-347C18.5	87.1293	-1.19296	0.310625	-3.84053	0.00012277	0.000724254	2	E-G	CPSF6 Knock-out
UBA6-AS1	1236.22	0.0712063	0.0888675	0.801263	0.422979	0.624476	2	E-G	CPSF6 Knock-out
RN7SKP176	17.0997	0.735943	0.623555	1.18024	0.237905	0.425041	2	E-G	CPSF6 Knock-out
RP11-59H7.1	23.4209	-0.100725	0.63303	-0.159116	0.873577	0.939588	2	E-G	CPSF6 Knock-out
RP11-345J18.2	792.598	0.301969	0.115995	2.6033	0.00923315	0.0327407	2	E-G	CPSF6 Knock-out
UVSSA	2592.96	-0.262119	0.0667233	-3.92844	8.54978e-05	0.000521493	2	E-G	CPSF6 Knock-out
NSL1	2547.87	-0.39061	0.0747707	-5.22411	1.74995e-07	1.78362e-06	2	E-G	CPSF6 Knock-out
UTP14C	426.43	-1.29191	0.502282	-2.57208	0.0101089	0.035347	2	E-G	CPSF6 Knock-out
RP11-701H24.9	23.448	0.747514	0.605682	1.23417	0.21714	0.39855	2	E-G	CPSF6 Knock-out
FASTKD2	4356.46	0.234359	0.0693876	3.37754	0.000731375	0.00359647	2	E-G	CPSF6 Knock-out
INSL3	332.963	0.61325	0.173399	3.53663	0.000405267	0.00211726	2	E-G	CPSF6 Knock-out
TMEM110-MUSTN1	893.718	-0.581806	0.260357	-2.23465	0.0254405	0.0764659	2	E-G	CPSF6 Knock-out
RP11-573D15.8	56.2805	-0.200254	0.431327	-0.464274	0.642452	0.799157	2	E-G	CPSF6 Knock-out
AKNAD1	4.57851	3.08428	1.93815	1.59135	0.11153	0.246719	2	E-G	CPSF6 Knock-out
GLRX	2670.14	-0.146646	0.0786413	-1.86474	0.0622178	0.156616	2	E-G	CPSF6 Knock-out
RP11-432J24.3	6.63725	-4.82801	1.79684	-2.68694	0.00721099	0.0265753	2	E-G	CPSF6 Knock-out
RP11-345J4.6	3945.24	-0.268039	0.0728028	-3.68171	0.000231679	0.00128082	2	E-G	CPSF6 Knock-out
SIN3B	4799.02	0.157604	0.0548627	2.87271	0.00406973	0.0162379	2	E-G	CPSF6 Knock-out
AL928654.7	186.741	-0.193534	0.565485	-0.342245	0.732167	0.858252	2	E-G	CPSF6 Knock-out
RP11-288L9.1	7.66529	-0.433893	1.24083	-0.349681	0.726578	0.854895	2	E-G	CPSF6 Knock-out
FABP5P7	83.5724	0.318507	0.207992	1.53134	0.125685	0.269406	2	E-G	CPSF6 Knock-out
TRAPPC11	5462.88	0.217656	0.0658716	3.30425	0.000952298	0.00453681	2	E-G	CPSF6 Knock-out
SSC5D	119.157	0.3538	0.285104	1.24095	0.214624	0.395337	2	E-G	CPSF6 Knock-out
RP4-669L17.8	117.047	-0.211892	0.175254	-1.20906	0.226641	0.410974	2	E-G	CPSF6 Knock-out
FUNDC2P4	25.6983	0.874171	0.534541	1.63537	0.101972	0.23043	2	E-G	CPSF6 Knock-out
SRGAP3-AS2	12.7544	-2.61595	1.07913	-2.42413	0.015345	0.0505287	2	E-G	CPSF6 Knock-out
MAP1B	461.487	-0.370741	0.205536	-1.80377	0.0712669	0.174388	2	E-G	CPSF6 Knock-out
AP000640.10	24.7933	1.18866	0.497682	2.38838	0.0169228	0.0548115	2	E-G	CPSF6 Knock-out
HNRNPU-AS1	6420.37	-0.211104	0.0909953	-2.31995	0.0203438	0.06383	2	E-G	CPSF6 Knock-out
RP11-506M12.1	91.45	-0.188557	0.2623	-0.718862	0.472226	0.667688	2	E-G	CPSF6 Knock-out
TRMT1	2983.18	0.0127968	0.0593418	0.215646	0.829264	0.915469	2	E-G	CPSF6 Knock-out
AC093724.2	115.875	-0.879023	0.208389	-4.21817	2.46289e-05	0.000168044	2	E-G	CPSF6 Knock-out
RP11-323I15.5	6.78161	1.8719	1.34084	1.39606	0.162697	0.325405	2	E-G	CPSF6 Knock-out
LAPTM4A	3105.39	0.326053	0.0706653	4.61405	3.94905e-06	3.14997e-05	2	E-G	CPSF6 Knock-out
E2F6	1062.6	0.22923	0.0895999	2.55837	0.0105164	0.0365856	2	E-G	CPSF6 Knock-out
NICN1	2013.37	-0.145559	0.0729992	-1.99398	0.046154	0.123546	2	E-G	CPSF6 Knock-out
LPAR5	1366.11	-0.228702	0.0785848	-2.91025	0.00361134	0.0146498	2	E-G	CPSF6 Knock-out
SNORD125	6.27638	0.700356	0.703827	0.995069	0.319703	0.520931	2	E-G	CPSF6 Knock-out
ACTG1P17	84.2873	-0.724158	0.403467	-1.79484	0.0726793	0.177068	2	E-G	CPSF6 Knock-out
RP11-401F2.3	28.5736	0.474807	0.410812	1.15578	0.247773	0.4371	2	E-G	CPSF6 Knock-out
INSIG1	20037.2	0.356527	0.0669221	5.3275	9.95727e-08	1.05394e-06	2	E-G	CPSF6 Knock-out
RAPGEF4	90.7819	-0.81971	0.351703	-2.33069	0.0197699	0.0623273	2	E-G	CPSF6 Knock-out
ECSIT	1892.99	0.281288	0.0844732	3.32991	0.000868741	0.00418291	2	E-G	CPSF6 Knock-out
SRP54	8236.25	0.154159	0.0577988	2.66716	0.00764944	0.0279946	2	E-G	CPSF6 Knock-out
MRPL40P1	7.95054	-0.199296	0.806024	-0.247258	0.804709	0.901913	2	E-G	CPSF6 Knock-out
HLA-E	61999.8	-0.439584	0.0716396	-6.13605	8.45968e-10	1.2045e-08	2	E-G	CPSF6 Knock-out
KLHL41	31.9436	0.158902	0.440634	0.360621	0.718383	0.849961	2	E-G	CPSF6 Knock-out
LYVE1	3.63158	-3.57038	2.33716	-1.52766	0.126598	0.270879	2	E-G	CPSF6 Knock-out
ANKRD37	1250.18	0.591284	0.112345	5.26313	1.41626e-07	1.45948e-06	2	E-G	CPSF6 Knock-out
ZNRF2P1	43.9351	1.00511	0.460629	2.18204	0.0291069	0.0852048	2	E-G	CPSF6 Knock-out
TCTEX1D2	415.017	0.215317	0.142901	1.50676	0.131872	0.279062	2	E-G	CPSF6 Knock-out
AOC2	214.6	-0.542269	0.153258	-3.53828	0.000402745	0.00210675	2	E-G	CPSF6 Knock-out
AC104451.2	16.3485	-0.0387399	0.549656	-0.0704802	0.943811	0.973992	2	E-G	CPSF6 Knock-out
HIGD2B	6.56344	1.51208	1.14745	1.31777	0.187582	0.36035	2	E-G	CPSF6 Knock-out
RP11-419I17.1	22.1637	-0.623059	0.573736	-1.08597	0.277494	0.473377	2	E-G	CPSF6 Knock-out
RP11-295G20.2	134.965	0.104729	0.214979	0.487158	0.626146	0.786907	2	E-G	CPSF6 Knock-out
TRBV23-1	84.1307	-0.273021	0.328601	-0.830859	0.406053	0.608637	2	E-G	CPSF6 Knock-out
RP11-932O9.8	15.5604	0.112701	0.566927	0.198792	0.842425	0.923326	2	E-G	CPSF6 Knock-out
MIR4658	7.95248	-0.50746	0.562733	-0.901777	0.367175	0.570654	2	E-G	CPSF6 Knock-out
AC125238.1	11.9523	-0.730919	0.649199	-1.12588	0.260217	0.453209	2	E-G	CPSF6 Knock-out
CTC-277H1.6	223.411	-0.404221	0.202988	-1.99135	0.046442	0.124156	2	E-G	CPSF6 Knock-out
CTD-2666L21.3	15.3287	-0.936981	0.540654	-1.73305	0.0830866	0.196489	2	E-G	CPSF6 Knock-out
RP11-274J16.5	7.99759	1.12028	1.14799	0.975866	0.329131	0.531291	2	E-G	CPSF6 Knock-out
ARSD	405.158	-0.540377	0.15254	-3.54252	0.000396319	0.00207765	2	E-G	CPSF6 Knock-out
CBY1	459.71	-0.359509	0.126321	-2.84599	0.00442734	0.0174644	2	E-G	CPSF6 Knock-out
TP53I11	1010.44	0.866637	0.117908	7.35013	1.98008e-13	4.3745e-12	2	E-G	CPSF6 Knock-out
RP11-420L9.5	4.50489	2.22606	1.45917	1.52556	0.12712	0.271513	2	E-G	CPSF6 Knock-out
GUSBP1	1305.37	0.0944906	0.0908549	1.04002	0.298333	0.49702	2	E-G	CPSF6 Knock-out
C16orf54	5219.94	-0.371252	0.0554815	-6.69146	2.20957e-11	3.919e-10	2	E-G	CPSF6 Knock-out
AC010525.4	53.4989	-0.0686186	0.371649	-0.184633	0.853517	0.929485	2	E-G	CPSF6 Knock-out
LMO7DN	2.22872	3.75666	3.06143	1.22709	0.219788	0.402179	2	E-G	CPSF6 Knock-out
MIR6501	1242.96	0.0976051	0.111011	0.879237	0.379273	0.582806	2	E-G	CPSF6 Knock-out
EXOSC1	1803.96	0.0700123	0.0723567	0.9676	0.333244	0.535868	2	E-G	CPSF6 Knock-out
RP11-270M14.5	7.80777	-1.52118	1.16099	-1.31025	0.190113	0.363822	2	E-G	CPSF6 Knock-out
GZMH	628.911	2.5898	0.209378	12.369	3.84491e-35	5.28675e-33	2	E-G	CPSF6 Knock-out
RP13-297E16.5	38.4332	-1.27193	0.601167	-2.11577	0.034364	0.0973185	2	E-G	CPSF6 Knock-out
LPL	67.8307	2.34188	0.497025	4.7118	2.45543e-06	2.04008e-05	2	E-G	CPSF6 Knock-out
PDIA3P2	30.4316	0.54469	0.378398	1.43946	0.150019	0.306958	2	E-G	CPSF6 Knock-out
INA	100.427	1.51958	0.351964	4.31741	1.57869e-05	0.000111727	2	E-G	CPSF6 Knock-out
CTC-325H20.4	64.9419	-0.237385	0.316631	-0.749721	0.453423	0.651642	2	E-G	CPSF6 Knock-out
MEGF9	2518.68	0.181635	0.0544568	3.33539	0.000851798	0.00410955	2	E-G	CPSF6 Knock-out
RNU1-87P	4.46356	1.75339	1.37796	1.27245	0.203214	0.381101	2	E-G	CPSF6 Knock-out
IGBP1-AS2	19.8363	-0.504127	0.55944	-0.901127	0.367521	0.570914	2	E-G	CPSF6 Knock-out
RP3-514A23.2	7.21734	-0.0332922	0.805882	-0.0413114	0.967048	0.985225	2	E-G	CPSF6 Knock-out
PHGR1	24.3681	-0.0382675	0.608568	-0.0628812	0.949861	0.976719	2	E-G	CPSF6 Knock-out
LINC00598	66.6794	0.478476	0.303095	1.57863	0.11442	0.251457	2	E-G	CPSF6 Knock-out
NPB	8.82413	0.680184	0.83335	0.816204	0.414384	0.616865	2	E-G	CPSF6 Knock-out
SDF2L1	821.637	0.691946	0.102022	6.78231	1.18268e-11	2.16688e-10	2	E-G	CPSF6 Knock-out
TTC30B	410.849	-0.638564	0.123094	-5.1876	2.13026e-07	2.14176e-06	2	E-G	CPSF6 Knock-out
RNF123	3264.34	0.00271967	0.0875593	0.0310609	0.975221	0.988538	2	E-G	CPSF6 Knock-out
RP11-214O1.2	1599.82	-0.911867	0.0972842	-9.37323	7.03484e-21	3.21919e-19	2	E-G	CPSF6 Knock-out
RP11-403B2.7	137.244	0.118281	0.289247	0.408927	0.682593	0.826479	2	E-G	CPSF6 Knock-out
ITGAV	3340.76	0.284477	0.0645972	4.40385	1.06345e-05	7.79168e-05	2	E-G	CPSF6 Knock-out
RP11-380M21.3	45.9029	0.188881	0.399661	0.472605	0.636495	0.794141	2	E-G	CPSF6 Knock-out
KRT8P50	29.9035	-0.279503	0.658798	-0.424263	0.671374	0.817908	2	E-G	CPSF6 Knock-out
RHOBTB3	321.682	-0.211033	0.152692	-1.38208	0.166947	0.331518	2	E-G	CPSF6 Knock-out
VIPR1-AS1	78.5103	-1.32738	0.310268	-4.27816	1.88446e-05	0.000131212	2	E-G	CPSF6 Knock-out
SNORA11	43.1675	-0.387222	0.373489	-1.03677	0.299844	0.498415	2	E-G	CPSF6 Knock-out
AC021188.4	313.81	0.22425	0.142102	1.57809	0.114545	0.251635	2	E-G	CPSF6 Knock-out
RP11-19J5.1	15.7234	-0.43226	0.616083	-0.701625	0.482913	0.676472	2	E-G	CPSF6 Knock-out
RP11-250B2.5	21.5782	-1.05465	0.493415	-2.13745	0.0325616	0.0932753	2	E-G	CPSF6 Knock-out
DOCK1	7.30025	2.79724	1.63543	1.7104	0.0871928	0.203763	2	E-G	CPSF6 Knock-out
ENTHD1	34.6917	0.198249	0.598107	0.33146	0.740297	0.862913	2	E-G	CPSF6 Knock-out
ARL2	2984.14	-0.143288	0.0867462	-1.65181	0.0985729	0.224559	2	E-G	CPSF6 Knock-out
CPNE5	419.741	0.097638	0.169633	0.575583	0.564897	0.74136	2	E-G	CPSF6 Knock-out
HSPD1	34648.3	0.20439	0.0709424	2.88106	0.00396337	0.0158727	2	E-G	CPSF6 Knock-out
SLC46A1	1678.95	0.315858	0.136451	2.31481	0.0206231	0.064545	2	E-G	CPSF6 Knock-out
RP11-151A6.4	68.8362	-0.291257	0.328076	-0.887773	0.374663	0.578431	2	E-G	CPSF6 Knock-out
RN7SL812P	50.4267	0.154582	0.288028	0.536691	0.591481	0.760927	2	E-G	CPSF6 Knock-out
MUC3A	7.92483	2.69259	2.83301	0.950433	0.341892	0.544489	2	E-G	CPSF6 Knock-out
RP11-85A1.3	33.957	0.136749	0.385161	0.355042	0.722558	0.852317	2	E-G	CPSF6 Knock-out
RN7SL672P	13.121	0.0657448	0.767475	0.0856637	0.931734	0.968216	2	E-G	CPSF6 Knock-out
SBDSP1	933.075	0.215418	0.0958496	2.24746	0.0246105	0.074458	2	E-G	CPSF6 Knock-out
TRBV19	1020.1	-0.151172	0.105606	-1.43148	0.152294	0.310046	2	E-G	CPSF6 Knock-out
LL09NC01-251B2.3	18.1055	-0.563038	0.920333	-0.611776	0.540686	0.723464	2	E-G	CPSF6 Knock-out
RP11-573M3.3	49.6101	0.0330865	0.402596	0.0821828	0.934501	0.969645	2	E-G	CPSF6 Knock-out
DNAJC30	958.294	0.0553485	0.0936042	0.591303	0.554317	0.734014	2	E-G	CPSF6 Knock-out
RP11-415I12.3	13.3325	0.307937	0.556141	0.553703	0.579782	0.752752	2	E-G	CPSF6 Knock-out
C18orf25	7789.08	-0.658956	0.0658533	-10.0064	1.42833e-23	8.21572e-22	2	E-G	CPSF6 Knock-out
C10orf25	43.8778	-0.739987	0.365798	-2.02294	0.0430794	0.116791	2	E-G	CPSF6 Knock-out
RP11-327F22.1	64.738	0.276479	0.30644	0.902229	0.366935	0.570489	2	E-G	CPSF6 Knock-out
SYCE1L	118.444	0.454639	0.227399	1.9993	0.0455761	0.122317	2	E-G	CPSF6 Knock-out
TPI1P2	70.9698	-0.680051	0.249489	-2.72578	0.00641501	0.0240532	2	E-G	CPSF6 Knock-out
AC003989.3	9.85737	1.00451	0.920053	1.09179	0.274924	0.470321	2	E-G	CPSF6 Knock-out
RP11-417B4.3	5.53812	0.270036	1.22752	0.219986	0.825882	0.913755	2	E-G	CPSF6 Knock-out
MIR548O	6.36517	0.011605	0.671327	0.0172866	0.986208	0.993582	2	E-G	CPSF6 Knock-out
MYO1A	371.994	1.49151	0.19274	7.73847	1.00623e-14	2.56216e-13	2	E-G	CPSF6 Knock-out
CFP	426.854	-0.337967	0.118557	-2.85068	0.00436264	0.0172445	2	E-G	CPSF6 Knock-out
RP11-109E24.2	8.75203	0.524499	1.07333	0.488665	0.625079	0.786216	2	E-G	CPSF6 Knock-out
RP11-14I17.1	56.0435	0.322194	0.456911	0.705156	0.480713	0.674896	2	E-G	CPSF6 Knock-out
C7orf71	6.71578	2.19992	2.44109	0.901203	0.36748	0.570913	2	E-G	CPSF6 Knock-out
CHAD	96.6278	-0.567982	0.217243	-2.6145	0.0089357	0.0318659	2	E-G	CPSF6 Knock-out
Z85986.1	29.3785	-0.465119	0.407276	-1.14202	0.253444	0.444309	2	E-G	CPSF6 Knock-out
IGHV3-33-2	16.2992	1.73183	0.918631	1.88522	0.0593995	0.150903	2	E-G	CPSF6 Knock-out
BRD7P4	60.5287	0.244622	0.33089	0.739285	0.459734	0.657105	2	E-G	CPSF6 Knock-out
RP11-647O20.1	17.164	0.0398578	0.652599	0.0610755	0.951299	0.977397	2	E-G	CPSF6 Knock-out
CXCL10	329.317	1.40727	0.183173	7.68271	1.55759e-14	3.90411e-13	2	E-G	CPSF6 Knock-out
RNY1P9	20.2799	0.620515	0.458351	1.3538	0.1758	0.343844	2	E-G	CPSF6 Knock-out
GMPR	62.1147	0.667709	0.261314	2.5552	0.0106128	0.0368545	2	E-G	CPSF6 Knock-out
RP11-54O7.18	731.155	0.758267	0.142758	5.31155	1.08697e-07	1.14549e-06	2	E-G	CPSF6 Knock-out
SHF	1489.72	0.994472	0.118037	8.42512	3.60396e-17	1.18121e-15	2	E-G	CPSF6 Knock-out
RP11-488L18.3	129.691	1.1659	0.266562	4.37387	1.22065e-05	8.84029e-05	2	E-G	CPSF6 Knock-out
ZNF559	1342	-0.346735	0.0927568	-3.73811	0.000185408	0.0010485	2	E-G	CPSF6 Knock-out
RP11-148O21.4	3.55499	0.2936	1.79283	0.163764	0.869917	0.937901	2	E-G	CPSF6 Knock-out
PTCD1	2676.38	0.120003	0.0717117	1.67341	0.0942476	0.216517	2	E-G	CPSF6 Knock-out
MIR4712	79.23	0.0416162	0.286838	0.145086	0.884643	0.944437	2	E-G	CPSF6 Knock-out
RGS2	573.292	1.04342	0.159594	6.53795	6.2368e-11	1.0452e-09	2	E-G	CPSF6 Knock-out
AC012363.4	22.2551	0.77747	0.553648	1.40427	0.160239	0.321715	2	E-G	CPSF6 Knock-out
RP11-650L12.4	22.889	0.123858	0.670417	0.184748	0.853427	0.929485	2	E-G	CPSF6 Knock-out
VPS13B	12909.1	-0.0799389	0.0459733	-1.73881	0.0820681	0.194622	2	E-G	CPSF6 Knock-out
RN7SL145P	58.2672	-0.398194	0.339995	-1.17118	0.241528	0.429361	2	E-G	CPSF6 Knock-out
TMEM190	41.2834	0.0598185	0.360457	0.165952	0.868195	0.936848	2	E-G	CPSF6 Knock-out
MKI67P1	12.0658	2.87701	1.02637	2.8031	0.00506147	0.0196122	2	E-G	CPSF6 Knock-out
RP11-69J7.1	23.4473	-0.0675388	0.504828	-0.133786	0.893572	0.949157	2	E-G	CPSF6 Knock-out
PODXL	700.959	0.0812507	0.10977	0.740189	0.459185	0.65658	2	E-G	CPSF6 Knock-out
SHQ1	2785.21	0.248796	0.0592185	4.20132	2.65367e-05	0.000179997	2	E-G	CPSF6 Knock-out
ANGPTL3	25.4406	-0.163212	0.713162	-0.228857	0.81898	0.910093	2	E-G	CPSF6 Knock-out
RP11-358L22.3	214.483	-1.06878	0.177334	-6.02695	1.67084e-09	2.28869e-08	2	E-G	CPSF6 Knock-out
RP11-758P17.3	5.98573	-1.6993	0.765681	-2.21933	0.026464	0.0789093	2	E-G	CPSF6 Knock-out
RP11-758P17.2	17.5894	-0.514688	0.4789	-1.07473	0.282496	0.478967	2	E-G	CPSF6 Knock-out
RPS4XP1	30.8629	1.2584	0.531208	2.36894	0.017839	0.057227	2	E-G	CPSF6 Knock-out
CH507-9B2.2	21.0974	-0.969157	0.468289	-2.06957	0.0384925	0.106677	2	E-G	CPSF6 Knock-out
AC079305.10	24.886	-0.324897	0.434156	-0.748343	0.454253	0.652176	2	E-G	CPSF6 Knock-out
CTD-2530H12.2	7.50956	3.99289	1.05344	3.79032	0.000150451	0.000867986	2	E-G	CPSF6 Knock-out
PPP2CB	2140.58	0.130713	0.05575	2.34463	0.0190458	0.060447	2	E-G	CPSF6 Knock-out
SLC25A43	1468.62	0.237221	0.0841784	2.81808	0.00483119	0.0188591	2	E-G	CPSF6 Knock-out
NEDD1	7214.48	-0.0303897	0.0677714	-0.448415	0.653854	0.806294	2	E-G	CPSF6 Knock-out
BLOC1S6	7563.02	-0.610854	0.0798161	-7.65327	1.9593e-14	4.8562e-13	2	E-G	CPSF6 Knock-out
LYPLA1P3	11.5392	-0.0632024	0.509067	-0.124153	0.901194	0.953095	2	E-G	CPSF6 Knock-out
ACAP2	12727.6	-0.426479	0.0591525	-7.20984	5.60197e-13	1.17641e-11	2	E-G	CPSF6 Knock-out
AC053503.4	4.59785	0.443144	1.88325	0.235309	0.813969	0.907177	2	E-G	CPSF6 Knock-out
PVT1	3646.91	0.36406	0.0800024	4.55061	5.34898e-06	4.15752e-05	2	E-G	CPSF6 Knock-out
ADAM20	60.2213	0.575277	0.33421	1.72131	0.0851955	0.200132	2	E-G	CPSF6 Knock-out
LINC01554	7.15287	1.92646	1.31307	1.46714	0.142339	0.295397	2	E-G	CPSF6 Knock-out
EIF2S2P4	100.883	-0.216392	0.24125	-0.89696	0.36974	0.573431	2	E-G	CPSF6 Knock-out
MCF2L2	1353.2	-0.190568	0.105841	-1.80051	0.0717804	0.175396	2	E-G	CPSF6 Knock-out
CNDP2	7771.68	-0.171003	0.0564452	-3.02954	0.00244928	0.010445	2	E-G	CPSF6 Knock-out
RP11-33B1.4	5.34535	-4.98264	1.19692	-4.16289	3.14249e-05	0.000210093	2	E-G	CPSF6 Knock-out
PTRH2	2615.59	0.30635	0.0601555	5.09263	3.53136e-07	3.40689e-06	2	E-G	CPSF6 Knock-out
NDRG3	4712.01	0.128373	0.0717933	1.7881	0.0737604	0.179038	2	E-G	CPSF6 Knock-out
RP11-664D1.1	180.48	-0.768414	0.185858	-4.13441	3.55861e-05	0.000234654	2	E-G	CPSF6 Knock-out
NUDT6	827.922	-0.349812	0.118437	-2.95357	0.00314126	0.0129632	2	E-G	CPSF6 Knock-out
RAB40AL	43.3083	0.527713	0.457497	1.15348	0.248714	0.438331	2	E-G	CPSF6 Knock-out
AC253578.1	7.81269	0.665641	0.639262	1.04127	0.297752	0.496512	2	E-G	CPSF6 Knock-out
AC083949.1	54.9007	-0.702262	0.341595	-2.05583	0.0397986	0.109509	2	E-G	CPSF6 Knock-out
ZNF608	7.84931	0.0834416	1.40285	0.05948	0.95257	0.978269	2	E-G	CPSF6 Knock-out
ETF1	14860.2	0.40201	0.064956	6.18896	6.05611e-10	8.80957e-09	2	E-G	CPSF6 Knock-out
VASH1	1396.91	0.158237	0.0800254	1.97733	0.0480044	0.127589	2	E-G	CPSF6 Knock-out
CKAP4	640.37	0.257102	0.17229	1.49226	0.135631	0.285074	2	E-G	CPSF6 Knock-out
PVRL4	11.2603	2.10828	1.21818	1.73068	0.083509	0.197213	2	E-G	CPSF6 Knock-out
FEN1	13080.7	0.241587	0.0629056	3.84046	0.000122803	0.000724254	2	E-G	CPSF6 Knock-out
RP11-456K23.1	18.8237	-0.0897975	0.698538	-0.128551	0.897713	0.951351	2	E-G	CPSF6 Knock-out
RP11-28B23.1	6.02965	0.381183	0.977031	0.390144	0.69643	0.83553	2	E-G	CPSF6 Knock-out
NHLH1	63.2954	1.06614	0.335891	3.17407	0.00150318	0.00682352	2	E-G	CPSF6 Knock-out
NPM3	1852.72	0.321644	0.0859646	3.74159	0.000182857	0.0010355	2	E-G	CPSF6 Knock-out
RP11-481G8.2	11.3243	-1.77688	1.14863	-1.54695	0.121874	0.263663	2	E-G	CPSF6 Knock-out
BIRC7	38.6032	0.545405	0.338196	1.61269	0.106812	0.239234	2	E-G	CPSF6 Knock-out
RP11-70P17.1	28.3044	-0.660955	0.566112	-1.16753	0.242995	0.43112	2	E-G	CPSF6 Knock-out
RPL15P4	13.4081	0.803488	0.587445	1.36777	0.171385	0.337867	2	E-G	CPSF6 Knock-out
ZNF814	3609.87	-0.0126915	0.0791676	-0.160312	0.872635	0.939388	2	E-G	CPSF6 Knock-out
SAT2	1234.66	0.350179	0.0866559	4.04103	5.32167e-05	0.000338681	2	E-G	CPSF6 Knock-out
SF3A2	9851.98	0.0727867	0.0609171	1.19485	0.232146	0.417617	2	E-G	CPSF6 Knock-out
RP11-932O9.7	83.8194	-0.258112	0.232543	-1.10995	0.26702	0.46064	2	E-G	CPSF6 Knock-out
FABP2	18.4995	-0.518562	0.754335	-0.687443	0.491804	0.683521	2	E-G	CPSF6 Knock-out
BARD1	10020.4	-0.233759	0.0525401	-4.44916	8.62072e-06	6.43212e-05	2	E-G	CPSF6 Knock-out
RN7SL246P	22.6348	-0.314373	0.415655	-0.756332	0.44945	0.647611	2	E-G	CPSF6 Knock-out
RP1-30M3.6	102.79	-0.276863	0.266019	-1.04077	0.297984	0.496699	2	E-G	CPSF6 Knock-out
DYNC1LI2	9486.66	0.0889574	0.0529292	1.68069	0.0928238	0.213893	2	E-G	CPSF6 Knock-out
MRPL37P1	133.038	0.128982	0.232307	0.555222	0.578743	0.751809	2	E-G	CPSF6 Knock-out
GRK4	299.853	0.0823286	0.158864	0.518233	0.604295	0.770479	2	E-G	CPSF6 Knock-out
RP11-690G19.4	13.324	-0.763252	0.716839	-1.06475	0.28699	0.484073	2	E-G	CPSF6 Knock-out
ZBTB20-AS4	24.6827	-0.101445	0.585847	-0.173159	0.862526	0.933981	2	E-G	CPSF6 Knock-out
RP11-91P24.5	23.9633	-1.28423	0.446017	-2.87933	0.00398515	0.0159423	2	E-G	CPSF6 Knock-out
PFN1P2	751.331	-0.62649	0.169682	-3.69215	0.000222368	0.00123431	2	E-G	CPSF6 Knock-out
TRIP4	1621.05	0.0339279	0.0709141	0.478437	0.63234	0.791196	2	E-G	CPSF6 Knock-out
RN7SL840P	7.13771	-0.0852309	0.676508	-0.125987	0.899743	0.952593	2	E-G	CPSF6 Knock-out
FBXO11	6557.11	-0.0588861	0.0394758	-1.4917	0.135777	0.285256	2	E-G	CPSF6 Knock-out
PCDHGB1	10.0172	-0.647858	0.860908	-0.752529	0.451733	0.650012	2	E-G	CPSF6 Knock-out
CDKL5	298.628	-0.00968416	0.172443	-0.0561586	0.955216	0.979399	2	E-G	CPSF6 Knock-out
PPP1R13L	4174.72	0.180482	0.0826179	2.18454	0.0289224	0.0847508	2	E-G	CPSF6 Knock-out
RP11-640N20.5	5.85467	-0.354911	0.802427	-0.442296	0.658275	0.809147	2	E-G	CPSF6 Knock-out
CTC-429P9.3	404.496	-1.12667	0.141705	-7.95081	1.85291e-15	5.07135e-14	2	E-G	CPSF6 Knock-out
PSMC2	6796.25	0.283918	0.0676305	4.19808	2.69185e-05	0.000182372	2	E-G	CPSF6 Knock-out
AC009961.2	11.5146	-0.91324	0.762248	-1.19809	0.230883	0.416195	2	E-G	CPSF6 Knock-out
GFOD1-AS1	4.27052	0.396157	1.90613	0.207833	0.835359	0.919455	2	E-G	CPSF6 Knock-out
TLN1	89777.2	0.330484	0.0416147	7.94152	1.99726e-15	5.45609e-14	2	E-G	CPSF6 Knock-out
DMAP1	2691.64	-0.226364	0.0513796	-4.40571	1.05436e-05	7.74077e-05	2	E-G	CPSF6 Knock-out
CST6	9.20148	4.84784	1.37188	3.53372	0.000409756	0.00213761	2	E-G	CPSF6 Knock-out
METTL3	5782.82	0.0994169	0.0497853	1.99691	0.0458345	0.122885	2	E-G	CPSF6 Knock-out
CD99	16852.4	0.333196	0.0598966	5.56285	2.65402e-08	3.06662e-07	2	E-G	CPSF6 Knock-out
LHPP	963.012	-0.675676	0.127493	-5.2997	1.15992e-07	1.21615e-06	2	E-G	CPSF6 Knock-out
PDHA1	4245.04	-0.0390532	0.0731492	-0.533885	0.593421	0.762472	2	E-G	CPSF6 Knock-out
USP20	7761.65	-0.222934	0.0485024	-4.59634	4.29967e-06	3.40612e-05	2	E-G	CPSF6 Knock-out
SLC17A2	57.9696	2.84175	0.599605	4.73937	2.14388e-06	1.80164e-05	2	E-G	CPSF6 Knock-out
CLEC17A	56.3236	1.36917	0.410554	3.33494	0.000853181	0.00411485	2	E-G	CPSF6 Knock-out
uc_338	37.7229	0.196076	0.470201	0.417005	0.676674	0.821967	2	E-G	CPSF6 Knock-out
PRAP1	70.3332	0.0023958	0.307721	0.00778561	0.993788	0.997147	2	E-G	CPSF6 Knock-out
PRR13P2	54.1843	-0.178574	0.3359	-0.531628	0.594984	0.763693	2	E-G	CPSF6 Knock-out
RPL7L1P3	15.2422	0.0781348	0.600933	0.130023	0.896549	0.950606	2	E-G	CPSF6 Knock-out
RP11-403H13.1	18.2156	0.163541	0.566402	0.288737	0.772782	0.882887	2	E-G	CPSF6 Knock-out
AC006946.17	7.1354	1.94196	0.868459	2.2361	0.0253453	0.0762656	2	E-G	CPSF6 Knock-out
CTA-228A9.3	76.1825	0.0220975	0.26521	0.0833207	0.933597	0.969148	2	E-G	CPSF6 Knock-out
NIPAL3	6272.02	-0.252451	0.0722089	-3.49613	0.000472063	0.00242455	2	E-G	CPSF6 Knock-out
DDX10	2919.04	0.522395	0.0794274	6.57701	4.79995e-11	8.15765e-10	2	E-G	CPSF6 Knock-out
ADAM10	22978.6	0.0633949	0.0362556	1.74856	0.0803678	0.191477	2	E-G	CPSF6 Knock-out
AC130689.5	23.9526	0.258482	0.544171	0.475001	0.634786	0.792808	2	E-G	CPSF6 Knock-out
CEMP1	30.0426	-4.39045	2.11103	-2.07977	0.0375469	0.10461	2	E-G	CPSF6 Knock-out
AL117209.1	8.40012	1.23495	0.738677	1.67184	0.0945559	0.217014	2	E-G	CPSF6 Knock-out
CYP4F29P	93.7496	3.82815	0.964348	3.96968	7.19688e-05	0.00044604	2	E-G	CPSF6 Knock-out
CD28	36272.7	-0.230485	0.053551	-4.30403	1.6772e-05	0.000118063	2	E-G	CPSF6 Knock-out
LMF1-AS1	109.568	-0.0867985	0.244618	-0.354833	0.722715	0.852432	2	E-G	CPSF6 Knock-out
CASP16P	40.8261	-0.16869	0.415412	-0.406078	0.684685	0.827901	2	E-G	CPSF6 Knock-out
RP11-318K15.2	6.4473	2.77443	0.950704	2.91829	0.00351961	0.0143254	2	E-G	CPSF6 Knock-out
NPIPB1P	10.8135	-0.565003	0.48458	-1.16596	0.243629	0.431742	2	E-G	CPSF6 Knock-out
KRT18P18	6.59324	-0.00939623	1.1798	-0.00796426	0.993646	0.997065	2	E-G	CPSF6 Knock-out
CTC-429P9.4	14.0289	-0.0532158	0.558743	-0.095242	0.924123	0.964019	2	E-G	CPSF6 Knock-out
RPL12P6	26.9248	0.199704	0.395287	0.505212	0.61341	0.7767	2	E-G	CPSF6 Knock-out
NPM1P35	21.0639	0.54893	0.424765	1.29232	0.196248	0.372011	2	E-G	CPSF6 Knock-out
RPL3P1	49.7769	-0.624966	0.378653	-1.6505	0.0988409	0.225024	2	E-G	CPSF6 Knock-out
THAP6	1336.79	-0.468258	0.0904887	-5.17477	2.28198e-07	2.28316e-06	2	E-G	CPSF6 Knock-out
SMIM11B	419.051	-0.0514554	0.114091	-0.451003	0.651987	0.804983	2	E-G	CPSF6 Knock-out
TULP1	2.84155	1.82467	2.30379	0.792028	0.428345	0.629182	2	E-G	CPSF6 Knock-out
RP11-640N20.4	218.999	-0.784925	0.177488	-4.42241	9.76059e-06	7.20442e-05	2	E-G	CPSF6 Knock-out
ADGRE4P	259.726	-0.0895963	0.187012	-0.479095	0.631871	0.790832	2	E-G	CPSF6 Knock-out
PPIA	79417	0.0281765	0.0659442	0.427278	0.669177	0.816569	2	E-G	CPSF6 Knock-out
AC112198.1	6.83957	2.14121	1.43165	1.49562	0.134752	0.283618	2	E-G	CPSF6 Knock-out
MLXIP	8870.53	-0.231093	0.0446978	-5.17012	2.33939e-07	2.33737e-06	2	E-G	CPSF6 Knock-out
PRKAR1A	27104.9	-0.344989	0.0660641	-5.22203	1.76969e-07	1.8031e-06	2	E-G	CPSF6 Knock-out
RP11-556H2.3	14.1442	1.83348	0.735669	2.49226	0.0126933	0.0430136	2	E-G	CPSF6 Knock-out
RP13-104F24.2	981.412	-0.858602	0.105865	-8.11038	5.04601e-16	1.48374e-14	2	E-G	CPSF6 Knock-out
RP13-104F24.1	3.39626	1.37893	2.18418	0.631327	0.527827	0.714127	2	E-G	CPSF6 Knock-out
RP11-640I15.1	23.969	-0.623754	0.425903	-1.46455	0.143045	0.296364	2	E-G	CPSF6 Knock-out
MYBL2	14716	-0.103972	0.052354	-1.98594	0.0470397	0.125496	2	E-G	CPSF6 Knock-out
RNF181	2215.69	0.195425	0.059822	3.26678	0.00108778	0.00510974	2	E-G	CPSF6 Knock-out
ARFRP1	5419.98	-0.0740249	0.0572734	-1.29248	0.19619	0.371987	2	E-G	CPSF6 Knock-out
AC009133.15	7.10003	0.0058127	0.805595	0.00721542	0.994243	0.997178	2	E-G	CPSF6 Knock-out
RP11-1007J8.1	7.19593	-0.430251	1.4032	-0.306622	0.759131	0.874251	2	E-G	CPSF6 Knock-out
CARS2	5844.34	0.15385	0.0516935	2.9762	0.00291841	0.0121688	2	E-G	CPSF6 Knock-out
EEF1DP1	8.03611	0.552035	0.857112	0.644064	0.519534	0.707587	2	E-G	CPSF6 Knock-out
RP1-13D10.3	6.72229	1.53841	0.79386	1.93788	0.0526377	0.137275	2	E-G	CPSF6 Knock-out
RP11-284F21.11	4.68964	-2.36772	1.79068	-1.32225	0.186086	0.358168	2	E-G	CPSF6 Knock-out
LILRP1	2.6666	0.355606	2.88545	0.123241	0.901916	0.953461	2	E-G	CPSF6 Knock-out
FMR1-AS1	15.217	-2.39965	0.757551	-3.16764	0.0015368	0.00695425	2	E-G	CPSF6 Knock-out
CH507-9B2.9	2876.36	-0.466863	0.0725231	-6.43743	1.2151e-10	1.94707e-09	2	E-G	CPSF6 Knock-out
EIF4A1P11	8.01425	-0.0756911	0.723433	-0.104628	0.916671	0.960734	2	E-G	CPSF6 Knock-out
LAMTOR2	1321.73	-0.2661	0.117043	-2.27353	0.0229945	0.0704522	2	E-G	CPSF6 Knock-out
RP11-65N13.8	10.3785	-0.621127	0.772001	-0.804568	0.421069	0.622637	2	E-G	CPSF6 Knock-out
MAP3K12	3399.7	-0.16522	0.0598019	-2.7628	0.00573087	0.0218425	2	E-G	CPSF6 Knock-out
FKBP9	194.192	0.384507	0.249221	1.54284	0.122871	0.265164	2	E-G	CPSF6 Knock-out
RP11-474L11.5	116.565	-0.0310678	0.236734	-0.131235	0.895589	0.950077	2	E-G	CPSF6 Knock-out
RP11-451N19.3	8.6482	-0.941846	1.10951	-0.848882	0.395947	0.599778	2	E-G	CPSF6 Knock-out
RP11-613F22.7	5.9958	1.5584	1.45966	1.06764	0.285682	0.482825	2	E-G	CPSF6 Knock-out
SEC23IP	8346.89	-0.0780182	0.0584897	-1.33388	0.182243	0.352676	2	E-G	CPSF6 Knock-out
FAM168A	8360.69	-0.334095	0.0433563	-7.70579	1.30034e-14	3.27637e-13	2	E-G	CPSF6 Knock-out
C9orf91	4017.32	0.389763	0.0684629	5.69306	1.24784e-08	1.51903e-07	2	E-G	CPSF6 Knock-out
LINC00336	19.2317	-0.173669	0.799962	-0.217097	0.828133	0.914955	2	E-G	CPSF6 Knock-out
C2CD5	9383.51	-0.275869	0.049702	-5.55046	2.84912e-08	3.27893e-07	2	E-G	CPSF6 Knock-out
MCCD1	96.7903	-0.0885785	0.298061	-0.297183	0.766327	0.878614	2	E-G	CPSF6 Knock-out
CMBL	297.817	0.467694	0.173223	2.69995	0.00693504	0.0256959	2	E-G	CPSF6 Knock-out
RN7SL370P	31.8238	-0.600988	0.522015	-1.15129	0.249615	0.439327	2	E-G	CPSF6 Knock-out
AL162590.1	80.4545	0.229697	0.377854	0.607899	0.543254	0.72552	2	E-G	CPSF6 Knock-out
AC005796.2	90.9658	0.211123	0.244347	0.86403	0.387571	0.591559	2	E-G	CPSF6 Knock-out
RP11-242C19.2	239.211	0.892771	0.190039	4.69784	2.62932e-06	2.17353e-05	2	E-G	CPSF6 Knock-out
IFT22	334.719	0.405173	0.153357	2.64203	0.00824104	0.029789	2	E-G	CPSF6 Knock-out
EEF1A1P11	3161.84	0.115041	0.0903807	1.27285	0.203071	0.380975	2	E-G	CPSF6 Knock-out
PPP1CB	30901.7	-0.0999322	0.0698209	-1.43127	0.152354	0.310106	2	E-G	CPSF6 Knock-out
MT-RNR1	19128.5	-0.453843	1.11458	-0.407186	0.683871	0.827402	2	E-G	CPSF6 Knock-out
ATG10-AS1	26.1664	-0.0544919	0.628667	-0.0866785	0.930927	0.967847	2	E-G	CPSF6 Knock-out
STK26	12141.8	-0.105822	0.0641244	-1.65026	0.09889	0.22507	2	E-G	CPSF6 Knock-out
ANKRD20A11P	218.578	0.633301	0.343534	1.84349	0.0652577	0.162553	2	E-G	CPSF6 Knock-out
TEX264	3544.67	-0.086757	0.0632918	-1.37075	0.170454	0.336537	2	E-G	CPSF6 Knock-out
RP11-611O2.1	168.167	0.341111	0.202158	1.68735	0.0915361	0.211448	2	E-G	CPSF6 Knock-out
RP11-611O2.3	571.341	0.468955	0.31715	1.47866	0.139232	0.290839	2	E-G	CPSF6 Knock-out
HLCS	2588.55	-0.222622	0.0715176	-3.11283	0.00185302	0.00819134	2	E-G	CPSF6 Knock-out
PSMD12P	5.54981	-0.611057	0.99197	-0.616003	0.537892	0.721529	2	E-G	CPSF6 Knock-out
BTG1	21603.8	-0.272563	0.121558	-2.24225	0.0249455	0.0752352	2	E-G	CPSF6 Knock-out
RPS10P18	15.2251	-0.0987355	0.653455	-0.151098	0.879899	0.942231	2	E-G	CPSF6 Knock-out
PIGZ	293.769	-0.380027	0.175105	-2.17027	0.0299861	0.0871675	2	E-G	CPSF6 Knock-out
AOX3P	11.0532	3.56212	0.774825	4.59732	4.27967e-06	3.39121e-05	2	E-G	CPSF6 Knock-out
VNN3	4.43496	-0.865184	1.74346	-0.496245	0.619722	0.781862	2	E-G	CPSF6 Knock-out
TBX20	8.67976	-2.13153	1.29884	-1.6411	0.100776	0.228353	2	E-G	CPSF6 Knock-out
TNFSF10	7083.52	0.386874	0.0595901	6.49226	8.45574e-11	1.38806e-09	2	E-G	CPSF6 Knock-out
RPL21P132	12.959	0.547887	0.962667	0.569135	0.569265	0.744689	2	E-G	CPSF6 Knock-out
CTD-2373J6.1	8.75881	-0.815594	0.872822	-0.934433	0.350081	0.553163	2	E-G	CPSF6 Knock-out
MARCH9	4025.55	0.0956743	0.0594894	1.60826	0.107779	0.240894	2	E-G	CPSF6 Knock-out
LINC01465	182.971	-0.0283645	0.214985	-0.131937	0.895034	0.949837	2	E-G	CPSF6 Knock-out
KRT18P67	5.20284	6.54584	1.78566	3.66577	0.000246591	0.00135522	2	E-G	CPSF6 Knock-out
SLC38A5	4782.86	0.412613	0.0652583	6.32277	2.56921e-10	3.93142e-09	2	E-G	CPSF6 Knock-out
EMC6	340.508	0.808482	0.19174	4.21655	2.48067e-05	0.000169136	2	E-G	CPSF6 Knock-out
TMEM185A	1390.74	-0.0474987	0.083931	-0.565925	0.571445	0.746404	2	E-G	CPSF6 Knock-out
SLC26A1	739.277	-0.461076	0.137403	-3.35564	0.000791825	0.00385933	2	E-G	CPSF6 Knock-out
SPDYE21P	109.738	-0.521267	0.27606	-1.88824	0.0589941	0.150044	2	E-G	CPSF6 Knock-out
C10orf95	235.168	-0.201743	0.188196	-1.07199	0.283727	0.480427	2	E-G	CPSF6 Knock-out
PIR	72.3306	1.04041	0.471944	2.20452	0.0274878	0.0813645	2	E-G	CPSF6 Knock-out
RNU6-553P	8.0978	-0.231076	0.6507	-0.355119	0.7225	0.852283	2	E-G	CPSF6 Knock-out
RP11-226L15.1	3.54758	0.814601	1.48319	0.549222	0.582853	0.754876	2	E-G	CPSF6 Knock-out
RBSN	3626.64	-0.186839	0.0565173	-3.30588	0.000946785	0.00451427	2	E-G	CPSF6 Knock-out
ERVH48-1	231.023	-0.829855	0.186481	-4.45009	8.58361e-06	6.41272e-05	2	E-G	CPSF6 Knock-out
EMC10	6359.84	0.451261	0.0420816	10.7235	7.89729e-27	5.70086e-25	2	E-G	CPSF6 Knock-out
PRPH2	59.595	-0.202651	0.381295	-0.531481	0.595086	0.763693	2	E-G	CPSF6 Knock-out
RP11-757G1.5	19.6148	-0.579869	0.571113	-1.01533	0.309948	0.510015	2	E-G	CPSF6 Knock-out
EIF3FP3	428.664	0.00530306	0.112522	0.0471292	0.96241	0.982763	2	E-G	CPSF6 Knock-out
MXD1	3364.65	0.56404	0.0797518	7.07244	1.52237e-12	3.04632e-11	2	E-G	CPSF6 Knock-out
RP11-6O2.2	15.7975	0.604288	0.657007	0.919759	0.357699	0.56109	2	E-G	CPSF6 Knock-out
TNFRSF4	4802.54	1.11207	0.110543	10.0601	8.29505e-24	4.8782e-22	2	E-G	CPSF6 Knock-out
YTHDF1	7744.99	0.0122785	0.050212	0.244532	0.806819	0.90312	2	E-G	CPSF6 Knock-out
CELSR3	4962.19	0.00523853	0.0593037	0.088334	0.929611	0.967074	2	E-G	CPSF6 Knock-out
RYR2	86.5761	0.739428	0.284819	2.59614	0.00942783	0.0333162	2	E-G	CPSF6 Knock-out
ATP5O	8072.88	0.042036	0.0716248	0.586892	0.557277	0.736285	2	E-G	CPSF6 Knock-out
MIR92A2	4.79848	-1.27873	1.00106	-1.27738	0.201469	0.378671	2	E-G	CPSF6 Knock-out
hsa-mir-6724-1	7.75415	0.866881	0.672491	1.28906	0.197377	0.373307	2	E-G	CPSF6 Knock-out
HCAR2	26.9191	0.592429	0.632532	0.936599	0.348965	0.551887	2	E-G	CPSF6 Knock-out
SAXO2	9.31223	0.116317	1.09831	0.105905	0.915658	0.96031	2	E-G	CPSF6 Knock-out
GUSBP2	454.76	-0.302528	0.111517	-2.71284	0.00667093	0.0248546	2	E-G	CPSF6 Knock-out
DDX55	3675.6	0.180885	0.0496701	3.64173	0.000270817	0.00147684	2	E-G	CPSF6 Knock-out
JMJD7	248.627	0.345456	0.419522	0.823451	0.410252	0.612983	2	E-G	CPSF6 Knock-out
ERCC6L2	4643.56	0.164539	0.0541739	3.03724	0.00238756	0.0102225	2	E-G	CPSF6 Knock-out
OR56B2P	4.54645	2.96771	1.43318	2.07072	0.0383851	0.106502	2	E-G	CPSF6 Knock-out
RBMS2	1865.15	0.172758	0.0778936	2.21787	0.0265634	0.0791639	2	E-G	CPSF6 Knock-out
PRMT6	1300.19	-0.668714	0.101146	-6.61138	3.8075e-11	6.53635e-10	2	E-G	CPSF6 Knock-out
RP11-490G8.1	18.4809	0.301096	0.457227	0.658525	0.510201	0.69966	2	E-G	CPSF6 Knock-out
MIF	37390.1	0.240085	0.062858	3.81949	0.00013373	0.000781515	2	E-G	CPSF6 Knock-out
MAU2	7144.31	-0.15377	0.056915	-2.70175	0.00689764	0.0255936	2	E-G	CPSF6 Knock-out
NSUN5P2	981.69	-0.0264954	0.0957219	-0.276795	0.781937	0.887971	2	E-G	CPSF6 Knock-out
SEPT14P12	150.974	-0.147518	0.202521	-0.728407	0.466365	0.66301	2	E-G	CPSF6 Knock-out
DUSP2	7283.87	1.75515	0.173943	10.0904	6.09376e-24	3.61308e-22	2	E-G	CPSF6 Knock-out
TCF4	506.007	0.550212	0.144764	3.80076	0.000144254	0.000836414	2	E-G	CPSF6 Knock-out
BCL11A	10.3557	0.850618	1.13924	0.746651	0.455274	0.653022	2	E-G	CPSF6 Knock-out
RPA2	7868.52	0.214194	0.0742691	2.88402	0.00392634	0.0157484	2	E-G	CPSF6 Knock-out
INHBC	17.104	0.330458	0.909979	0.363148	0.716494	0.848731	2	E-G	CPSF6 Knock-out
GPNMB	35.7204	-1.06359	0.511925	-2.07763	0.0377435	0.105064	2	E-G	CPSF6 Knock-out
RPL37P23	4.29716	-0.129118	1.11048	-0.116272	0.907437	0.956042	2	E-G	CPSF6 Knock-out
KCTD15	541.603	-0.217687	0.117616	-1.85082	0.0641954	0.160577	2	E-G	CPSF6 Knock-out
RP11-192H23.7	148.629	-0.405894	0.257044	-1.57909	0.114316	0.251316	2	E-G	CPSF6 Knock-out
SNORA12	67.8741	0.168689	0.369736	0.456243	0.648215	0.802376	2	E-G	CPSF6 Knock-out
YME1L1	23268.9	0.344744	0.057875	5.95671	2.57366e-09	3.43889e-08	2	E-G	CPSF6 Knock-out
HSPA13	7261.23	0.435945	0.0691575	6.30366	2.90707e-10	4.41101e-09	2	E-G	CPSF6 Knock-out
JMJD4	2330.79	0.0368327	0.0515562	0.714418	0.474969	0.670135	2	E-G	CPSF6 Knock-out
ZNF630	318.223	-0.077264	0.17449	-0.4428	0.65791	0.808906	2	E-G	CPSF6 Knock-out
RP11-360N9.3	89.036	-0.27245	0.308588	-0.882892	0.377295	0.58091	2	E-G	CPSF6 Knock-out
TXNRD3	254.714	0.118478	0.17943	0.660304	0.509059	0.698642	2	E-G	CPSF6 Knock-out
PCNX	21866.3	0.685362	0.0527199	13.0001	1.22234e-38	1.99407e-36	2	E-G	CPSF6 Knock-out
NDOR1	2715.67	-0.144041	0.0737725	-1.9525	0.0508788	0.133837	2	E-G	CPSF6 Knock-out
RNVU1-4	58.0215	-0.216003	0.35972	-0.600476	0.548189	0.729146	2	E-G	CPSF6 Knock-out
ARNT2	25.2256	0.751822	0.599356	1.25438	0.209703	0.389575	2	E-G	CPSF6 Knock-out
KAZALD1	33.5046	-0.127431	0.484796	-0.262855	0.792663	0.895187	2	E-G	CPSF6 Knock-out
ITCH-IT1	17.1679	-0.373405	0.534684	-0.698366	0.484948	0.678073	2	E-G	CPSF6 Knock-out
UBLCP1	2596.85	-0.252939	0.0809367	-3.12515	0.00177716	0.00790078	2	E-G	CPSF6 Knock-out
TRAJ1	31.9586	-0.211576	0.335109	-0.631363	0.527803	0.714127	2	E-G	CPSF6 Knock-out
RP13-735L24.1	106.797	-0.733612	0.247425	-2.96499	0.00302694	0.0125489	2	E-G	CPSF6 Knock-out
ZNF300P1	6.97606	-0.892194	1.19528	-0.746432	0.455406	0.653052	2	E-G	CPSF6 Knock-out
TOR1AIP1	13394.4	-0.127778	0.0528297	-2.41867	0.0155773	0.0511536	2	E-G	CPSF6 Knock-out
GALNT3	2134.14	-0.741358	0.10166	-7.29256	3.0412e-13	6.60757e-12	2	E-G	CPSF6 Knock-out
SNORA74	43.4987	-0.0751363	0.364566	-0.206098	0.836714	0.920316	2	E-G	CPSF6 Knock-out
GDI2	35230	0.153309	0.0661521	2.31753	0.020475	0.0641579	2	E-G	CPSF6 Knock-out
RP11-1336O20.2	131.639	-0.172449	0.288895	-0.596927	0.550556	0.730978	2	E-G	CPSF6 Knock-out
ZSCAN16	581.192	-0.265467	0.109523	-2.42385	0.0153571	0.050563	2	E-G	CPSF6 Knock-out
NAGPA	1080.28	-0.198152	0.085548	-2.31627	0.0205435	0.0643376	2	E-G	CPSF6 Knock-out
NPR1	2.83176	3.60412	2.54887	1.41401	0.157359	0.317367	2	E-G	CPSF6 Knock-out
VEZT	5709.32	0.290717	0.0493322	5.89305	3.79121e-09	4.97144e-08	2	E-G	CPSF6 Knock-out
RP5-855D21.2	38.8432	0.106996	0.451152	0.237162	0.812531	0.906415	2	E-G	CPSF6 Knock-out
ZNF418	713.582	-0.0958337	0.108308	-0.88483	0.376248	0.579917	2	E-G	CPSF6 Knock-out
SPEN	23150.2	0.317056	0.0425195	7.45672	8.86996e-14	2.04569e-12	2	E-G	CPSF6 Knock-out
COL5A3	79.183	1.21203	0.287233	4.21968	2.44646e-05	0.00016704	2	E-G	CPSF6 Knock-out
MKRN5P	42.772	1.13902	0.531355	2.14361	0.032064	0.0921151	2	E-G	CPSF6 Knock-out
LTB4R	1725.45	0.0899513	0.0851481	1.05641	0.290781	0.488384	2	E-G	CPSF6 Knock-out
RP11-302F12.10	58.2615	0.0601355	0.414224	0.145176	0.884572	0.944437	2	E-G	CPSF6 Knock-out
CACNA1A	66.4891	-0.00382048	0.317976	-0.012015	0.990414	0.995447	2	E-G	CPSF6 Knock-out
RP11-50D9.3	75.4072	-0.00152887	0.391211	-0.00390804	0.996882	0.998646	2	E-G	CPSF6 Knock-out
RN7SL166P	42.8243	0.0451006	0.385766	0.116912	0.90693	0.955888	2	E-G	CPSF6 Knock-out
RP11-85G20.1	34.0892	-0.405318	0.535519	-0.756869	0.449128	0.64747	2	E-G	CPSF6 Knock-out
RP11-320P11.1	4.51284	2.46188	1.55349	1.58474	0.113024	0.249224	2	E-G	CPSF6 Knock-out
RP11-33O4.2	138.511	0.865172	1.19247	0.725529	0.468128	0.664203	2	E-G	CPSF6 Knock-out
LRRC59	7753.18	-0.0319672	0.0839498	-0.380789	0.70336	0.840487	2	E-G	CPSF6 Knock-out
AKR1B10P1	5.90991	-0.17296	1.15993	-0.149112	0.881465	0.943157	2	E-G	CPSF6 Knock-out
SIGIRR	4824.78	-0.472584	0.0729105	-6.4817	9.06952e-11	1.48291e-09	2	E-G	CPSF6 Knock-out
TFAP2E	156.162	-0.412809	0.188589	-2.18894	0.0286014	0.0839208	2	E-G	CPSF6 Knock-out
USP39	7414.32	0.0845776	0.0672567	1.25753	0.20856	0.388002	2	E-G	CPSF6 Knock-out
PYGL	104.045	0.605871	0.345199	1.75514	0.079236	0.189336	2	E-G	CPSF6 Knock-out
BRAP	3457.4	-0.0516371	0.0598411	-0.862904	0.38819	0.592128	2	E-G	CPSF6 Knock-out
FER	2212.68	-0.25834	0.0723466	-3.57087	0.000355796	0.00188576	2	E-G	CPSF6 Knock-out
TMPRSS5	60.8638	-0.310449	0.269447	-1.15217	0.249251	0.438895	2	E-G	CPSF6 Knock-out
RPL41P1	454.1	-0.00961749	0.101553	-0.0947043	0.92455	0.964304	2	E-G	CPSF6 Knock-out
RP11-517I3.1	37.0507	-0.539154	0.369562	-1.4589	0.144593	0.298607	2	E-G	CPSF6 Knock-out
GPR171	6526.84	0.0869231	0.0537799	1.61627	0.106035	0.237825	2	E-G	CPSF6 Knock-out
CDC42BPA	1359.98	-0.0153334	0.106567	-0.143885	0.885591	0.944809	2	E-G	CPSF6 Knock-out
CTD-2095E4.4	38.9186	0.239208	0.395248	0.605211	0.545039	0.726834	2	E-G	CPSF6 Knock-out
ZFP36L2	38429.3	-0.11879	0.0669962	-1.77309	0.0762137	0.183772	2	E-G	CPSF6 Knock-out
RP11-104O19.4	38.4372	0.19124	0.371368	0.51496	0.606581	0.771572	2	E-G	CPSF6 Knock-out
RLN3	3.36187	-2.21545	1.94061	-1.14163	0.25361	0.444517	2	E-G	CPSF6 Knock-out
C5orf58	532.512	-0.321987	0.131717	-2.44454	0.0145038	0.0482153	2	E-G	CPSF6 Knock-out
DPY19L2P3	62.5464	0.774094	0.47925	1.61522	0.106263	0.238244	2	E-G	CPSF6 Knock-out
AC007285.6	15.5728	0.508427	0.591869	0.85902	0.390329	0.594215	2	E-G	CPSF6 Knock-out
RP11-460N20.4	38.7979	0.300951	0.341096	0.882307	0.377611	0.581141	2	E-G	CPSF6 Knock-out
RP11-815J4.6	8.7248	-0.149155	0.683176	-0.218326	0.827175	0.914351	2	E-G	CPSF6 Knock-out
FAM66D	15.2692	-0.622721	0.696988	-0.893446	0.371618	0.57533	2	E-G	CPSF6 Knock-out
TM9SF4	6423.9	0.340321	0.0500595	6.79834	1.05831e-11	1.9517e-10	2	E-G	CPSF6 Knock-out
NUP155	19284.4	-0.100944	0.0622867	-1.62063	0.105097	0.236124	2	E-G	CPSF6 Knock-out
RP11-540D14.8	34.4064	9.21269	3.59826	2.56032	0.0104576	0.0363985	2	E-G	CPSF6 Knock-out
ADAMTS14	44.1288	1.64508	0.606029	2.71452	0.00663723	0.024761	2	E-G	CPSF6 Knock-out
MRPL54	1657.57	0.00270831	0.121593	0.0222736	0.98223	0.991813	2	E-G	CPSF6 Knock-out
KCND3	56.2335	-0.712486	0.356858	-1.99655	0.045874	0.122953	2	E-G	CPSF6 Knock-out
RP11-498C9.4	116.509	-0.34205	0.275813	-1.24015	0.214919	0.395701	2	E-G	CPSF6 Knock-out
AP002954.3	6.69917	0.464605	1.3852	0.335407	0.737318	0.861562	2	E-G	CPSF6 Knock-out
RP11-57K17.1	239.513	0.705057	0.24309	2.9004	0.00372687	0.0150487	2	E-G	CPSF6 Knock-out
POGK	11554.6	0.289838	0.0451823	6.41486	1.40955e-10	2.23263e-09	2	E-G	CPSF6 Knock-out
RP11-13J8.1	17.8314	-1.47088	0.689982	-2.13177	0.0330258	0.0943898	2	E-G	CPSF6 Knock-out
MSRA	1043.55	-0.123541	0.0977139	-1.26431	0.206117	0.384771	2	E-G	CPSF6 Knock-out
RP13-923O23.7	99.0323	-0.461951	0.205064	-2.25271	0.0242773	0.0736274	2	E-G	CPSF6 Knock-out
BBIP1	1530.71	-0.328655	0.0805979	-4.07771	4.5482e-05	0.000293626	2	E-G	CPSF6 Knock-out
RP11-311H10.7	4.63857	0.159449	1.42046	0.112252	0.910624	0.957707	2	E-G	CPSF6 Knock-out
RP11-314A20.5	7.82589	1.5523	0.648504	2.39366	0.0166812	0.0541992	2	E-G	CPSF6 Knock-out
RN7SL199P	42.9327	-0.467182	0.339915	-1.37441	0.169315	0.334976	2	E-G	CPSF6 Knock-out
FAF1	5978.41	0.066053	0.0526985	1.25341	0.210056	0.390105	2	E-G	CPSF6 Knock-out
GMPPA	2185.99	0.190164	0.0720434	2.63957	0.00830102	0.029969	2	E-G	CPSF6 Knock-out
AL353644.1	1250.88	0.535855	0.863086	0.62086	0.534692	0.719257	2	E-G	CPSF6 Knock-out
NKD1	747.954	-0.890134	0.123341	-7.21688	5.31946e-13	1.12034e-11	2	E-G	CPSF6 Knock-out
ABHD11	628.527	0.0137323	0.117958	0.116417	0.907322	0.955991	2	E-G	CPSF6 Knock-out
AC092755.4	9.9135	-0.0413022	0.607715	-0.067963	0.945815	0.974606	2	E-G	CPSF6 Knock-out
CICP5	48.3373	-0.321941	0.280674	-1.14703	0.25137	0.441556	2	E-G	CPSF6 Knock-out
RNF222	99.2615	-0.523651	0.24442	-2.14243	0.032159	0.0923695	2	E-G	CPSF6 Knock-out
RP5-1142A6.9	796.67	-0.219302	0.121876	-1.79939	0.0719577	0.17577	2	E-G	CPSF6 Knock-out
THA1P	13.2916	0.440632	0.665071	0.662534	0.507629	0.697361	2	E-G	CPSF6 Knock-out
MYH15	159.508	0.560105	0.248888	2.25043	0.0244218	0.0739725	2	E-G	CPSF6 Knock-out
SETD3	6421.4	-0.00346987	0.0565703	-0.0613372	0.951091	0.977357	2	E-G	CPSF6 Knock-out
DDR2	78.8611	0.83013	0.31239	2.65735	0.00787574	0.0286666	2	E-G	CPSF6 Knock-out
AJ271736.10	26.0239	-0.0700272	0.417817	-0.167603	0.866896	0.936322	2	E-G	CPSF6 Knock-out
APP	8128.62	0.317939	0.0620691	5.12234	3.01766e-07	2.95272e-06	2	E-G	CPSF6 Knock-out
BBS4	1043.05	-0.0428852	0.0877919	-0.488487	0.625205	0.78634	2	E-G	CPSF6 Knock-out
MTF1	4472.72	-0.171399	0.0535382	-3.20144	0.00136745	0.00627443	2	E-G	CPSF6 Knock-out
RP13-977J11.8	15.2333	-0.0638206	1.00925	-0.0632355	0.949579	0.976625	2	E-G	CPSF6 Knock-out
LINC00441	47.3113	0.10255	0.350126	0.292894	0.769603	0.880762	2	E-G	CPSF6 Knock-out
TNS4	1819.68	-0.066575	0.0681181	-0.977347	0.328397	0.530547	2	E-G	CPSF6 Knock-out
AMY2A	9.02416	-0.398509	2.913	-0.136804	0.891186	0.947878	2	E-G	CPSF6 Knock-out
KCTD14	7.32617	-0.112649	1.08684	-0.103648	0.917449	0.961084	2	E-G	CPSF6 Knock-out
CA6	410.622	0.000543536	0.169219	0.00321202	0.997437	0.99888	2	E-G	CPSF6 Knock-out
RP11-464F9.20	76.6491	0.109848	0.342588	0.320641	0.748482	0.868073	2	E-G	CPSF6 Knock-out
RP11-434H6.2	3.5223	2.62687	1.97254	1.33172	0.182953	0.35374	2	E-G	CPSF6 Knock-out
RP11-1148L6.5	322.9	-0.730639	0.174474	-4.18767	2.81836e-05	0.000190229	2	E-G	CPSF6 Knock-out
RP11-650L12.2	73.9599	-0.989081	0.334235	-2.95924	0.00308398	0.0127619	2	E-G	CPSF6 Knock-out
SNORD63	34.1241	-0.276944	0.383619	-0.721925	0.470341	0.666426	2	E-G	CPSF6 Knock-out
RP11-535C21.3	137.635	-0.233582	0.264405	-0.883427	0.377006	0.580713	2	E-G	CPSF6 Knock-out
AC068669.1	8.72203	0.810364	0.702139	1.15414	0.248445	0.43799	2	E-G	CPSF6 Knock-out
RP11-507K13.6	19.2704	0.501033	0.619712	0.808493	0.418807	0.620881	2	E-G	CPSF6 Knock-out
FTH1P25	22.3454	-0.309969	0.557537	-0.555962	0.578237	0.751421	2	E-G	CPSF6 Knock-out
MBLAC2	1507.22	-0.325646	0.0794935	-4.09651	4.19424e-05	0.000272277	2	E-G	CPSF6 Knock-out
AP4S1	1132.91	-0.0732835	0.0726845	-1.00824	0.313339	0.513838	2	E-G	CPSF6 Knock-out
ASUN	5896.26	0.193217	0.0574678	3.36218	0.000773303	0.00378011	2	E-G	CPSF6 Knock-out
EXOC7	12727.9	0.0994603	0.040633	2.44777	0.0143744	0.0478621	2	E-G	CPSF6 Knock-out
PSD	909.344	0.50413	0.117297	4.29791	1.72417e-05	0.000121044	2	E-G	CPSF6 Knock-out
TRDV1	128.07	0.227786	0.220242	1.03425	0.301018	0.499764	2	E-G	CPSF6 Knock-out
RNU6-476P	13.4823	0.35557	0.600181	0.592439	0.553557	0.733444	2	E-G	CPSF6 Knock-out
RP11-33N16.3	3.95747	-3.25451	1.50445	-2.16326	0.0305213	0.0884222	2	E-G	CPSF6 Knock-out
RP1-228H13.1	9.86424	-0.326146	0.613674	-0.531464	0.595097	0.763693	2	E-G	CPSF6 Knock-out
RP11-1430O6.1	3.76876	-0.11704	1.71882	-0.068093	0.945712	0.974549	2	E-G	CPSF6 Knock-out
TMEM221	51.6651	0.307893	0.439673	0.700276	0.483755	0.677126	2	E-G	CPSF6 Knock-out
CAPRIN1	40896.7	0.0878248	0.0577397	1.52105	0.128248	0.273578	2	E-G	CPSF6 Knock-out
EIF4BP3	714.638	0.196522	0.0979429	2.00649	0.0448038	0.120614	2	E-G	CPSF6 Knock-out
CNR1	11.9418	4.02351	0.980252	4.10457	4.0507e-05	0.000263968	2	E-G	CPSF6 Knock-out
MIR3940	12.5465	0.020773	0.475886	0.0436511	0.965182	0.984237	2	E-G	CPSF6 Knock-out
RP3-394A18.1	5364.23	-0.0622002	0.0874523	-0.711247	0.476931	0.671709	2	E-G	CPSF6 Knock-out
RRS1-AS1	107.122	-0.593615	0.212982	-2.78716	0.00531719	0.0204577	2	E-G	CPSF6 Knock-out
SNORD117	55.9671	-0.0150476	0.282453	-0.0532747	0.957513	0.980293	2	E-G	CPSF6 Knock-out
MIR3615	980.283	-0.0307086	0.125549	-0.244595	0.80677	0.90312	2	E-G	CPSF6 Knock-out
CFAP157	276.24	0.223098	0.16935	1.31737	0.187713	0.360531	2	E-G	CPSF6 Knock-out
RP11-388P9.2	44.0365	0.853114	0.390953	2.18214	0.0290993	0.0852048	2	E-G	CPSF6 Knock-out
RP11-211N11.5	28.7388	-1.05998	0.571625	-1.85433	0.0636919	0.159589	2	E-G	CPSF6 Knock-out
HS3ST1	19.7576	-0.208009	0.652369	-0.318852	0.749839	0.868907	2	E-G	CPSF6 Knock-out
RP13-991F5.2	162.016	0.20097	0.243502	0.825334	0.409182	0.612024	2	E-G	CPSF6 Knock-out
MNS1	9.48342	-0.949236	1.09019	-0.870708	0.383913	0.587467	2	E-G	CPSF6 Knock-out
CNOT7	11787.6	-0.142216	0.0549932	-2.58606	0.00970787	0.0341426	2	E-G	CPSF6 Knock-out
RP11-96D1.7	13.6643	0.639907	0.945988	0.676443	0.49876	0.689641	2	E-G	CPSF6 Knock-out
WEE2	21.6132	-1.47781	0.690292	-2.14085	0.0322863	0.0926708	2	E-G	CPSF6 Knock-out
MIR6739	20.608	0.0293274	0.438983	0.0668076	0.946735	0.975067	2	E-G	CPSF6 Knock-out
CDK5RAP3	9967.71	0.0520445	0.0530648	0.980772	0.326705	0.528621	2	E-G	CPSF6 Knock-out
PCBP2	76708.3	0.152703	0.0522021	2.92523	0.00344203	0.0140499	2	E-G	CPSF6 Knock-out
RN7SL517P	78.1969	-0.797208	0.325232	-2.4512	0.0142382	0.0475092	2	E-G	CPSF6 Knock-out
TMPRSS11D	41.2121	-0.171916	0.473489	-0.363083	0.716543	0.848731	2	E-G	CPSF6 Knock-out
COL6A2	2311.53	0.335661	0.0937778	3.57932	0.000344486	0.00183153	2	E-G	CPSF6 Knock-out
CKS1BP3	52.9291	0.0948564	0.27785	0.341394	0.732807	0.858441	2	E-G	CPSF6 Knock-out
MIR5009	5.47827	-2.19437	0.95007	-2.3097	0.020905	0.0652151	2	E-G	CPSF6 Knock-out
RP11-295D4.7	12.7937	0.507796	0.637416	0.796648	0.425655	0.626931	2	E-G	CPSF6 Knock-out
AC061992.2	30.9442	2.30883	0.558431	4.13449	3.55745e-05	0.000234631	2	E-G	CPSF6 Knock-out
HK2	21284.1	0.386422	0.0656209	5.88871	3.89216e-09	5.09579e-08	2	E-G	CPSF6 Knock-out
C17orf97	261.302	-0.3412	0.175024	-1.94945	0.0512423	0.134499	2	E-G	CPSF6 Knock-out
BRMS1L	814.551	0.43793	0.119783	3.65604	0.000256139	0.00140289	2	E-G	CPSF6 Knock-out
RP11-455F5.3	107.096	-0.596275	0.231429	-2.57649	0.0099809	0.034967	2	E-G	CPSF6 Knock-out
NKIRAS2	2226.43	-0.101287	0.0644831	-1.57075	0.11624	0.254399	2	E-G	CPSF6 Knock-out
PKIG	613.583	0.369941	0.129894	2.84802	0.00439917	0.0173675	2	E-G	CPSF6 Knock-out
SERF1B	590.968	0.0308354	0.0825034	0.373747	0.708592	0.843876	2	E-G	CPSF6 Knock-out
TNNI3K	13.6993	-0.791354	0.840834	-0.941154	0.346626	0.549607	2	E-G	CPSF6 Knock-out
HUS1B	87.6165	0.244504	0.266297	0.918163	0.358533	0.562064	2	E-G	CPSF6 Knock-out
CSAD	917.236	-0.0847364	0.117639	-0.720307	0.471336	0.667115	2	E-G	CPSF6 Knock-out
PDCL3	1485.27	0.108471	0.0870037	1.24674	0.212492	0.392987	2	E-G	CPSF6 Knock-out
LDHAP3	337.97	0.338036	0.162409	2.08138	0.0373988	0.104287	2	E-G	CPSF6 Knock-out
FBXW4	2540.39	0.20797	0.0838891	2.47911	0.0131712	0.0444218	2	E-G	CPSF6 Knock-out
RP5-956O18.2	78.3275	0.259814	0.310199	0.837572	0.402271	0.605735	2	E-G	CPSF6 Knock-out
AC079781.1	8.29084	0.588118	0.965104	0.609383	0.542271	0.724743	2	E-G	CPSF6 Knock-out
TRIM69	6394.95	-0.238358	0.0641033	-3.71835	0.000200529	0.00112564	2	E-G	CPSF6 Knock-out
RP11-385D13.3	96.2969	0.301029	0.236554	1.27256	0.203175	0.381093	2	E-G	CPSF6 Knock-out
FLJ33360	20.5429	0.903914	0.749039	1.20676	0.227523	0.411998	2	E-G	CPSF6 Knock-out
BMPER	3.17933	1.6462	2.07245	0.794327	0.427005	0.628173	2	E-G	CPSF6 Knock-out
C9orf139	241.641	1.22532	0.179402	6.83005	8.48838e-12	1.58028e-10	2	E-G	CPSF6 Knock-out
GPR151	86.268	0.257288	0.245481	1.0481	0.294594	0.492717	2	E-G	CPSF6 Knock-out
CNTD1	257.177	-0.122069	0.215097	-0.567507	0.57037	0.745628	2	E-G	CPSF6 Knock-out
GGTLC5P	3.62587	-2.40508	1.83384	-1.3115	0.18969	0.36312	2	E-G	CPSF6 Knock-out
NPM1P29	45.9978	0.247756	0.583307	0.424744	0.671023	0.817815	2	E-G	CPSF6 Knock-out
TWF1P1	18.931	-0.073833	0.46702	-0.158094	0.874383	0.939803	2	E-G	CPSF6 Knock-out
AP001350.4	107.407	0.417129	0.242494	1.72016	0.0854035	0.200441	2	E-G	CPSF6 Knock-out
AP003068.9	55.8506	1.31363	0.343667	3.82239	0.000132163	0.000773295	2	E-G	CPSF6 Knock-out
TLR3	3.17775	2.37749	2.08475	1.14042	0.254111	0.445073	2	E-G	CPSF6 Knock-out
MLLT3	7761.42	-0.205647	0.0468467	-4.38978	1.13465e-05	8.27763e-05	2	E-G	CPSF6 Knock-out
RP5-991G20.6	7.83105	0.846498	0.90784	0.932431	0.351114	0.554325	2	E-G	CPSF6 Knock-out
KRT17P6	9.09814	-0.203336	0.732833	-0.277466	0.781423	0.887631	2	E-G	CPSF6 Knock-out
HYDIN	12.0683	-0.567208	0.779667	-0.727501	0.466919	0.66316	2	E-G	CPSF6 Knock-out
KIF17	5.61992	1.70787	1.67884	1.01729	0.309015	0.508827	2	E-G	CPSF6 Knock-out
RNU6-645P	12.8989	0.584861	0.717815	0.81478	0.415198	0.6176	2	E-G	CPSF6 Knock-out
RP1-315G1.3	13.8064	0.682534	0.842283	0.810338	0.417746	0.619793	2	E-G	CPSF6 Knock-out
MIR648	7.55413	0.835772	0.792602	1.05447	0.291669	0.489501	2	E-G	CPSF6 Knock-out
RP11-344P13.3	10.7433	-1.17842	0.961065	-1.22616	0.220139	0.402599	2	E-G	CPSF6 Knock-out
NFKBIE	2319.85	0.417133	0.0624856	6.67567	2.46112e-11	4.33742e-10	2	E-G	CPSF6 Knock-out
TMEM258	3774.43	0.118736	0.0678784	1.74925	0.0802475	0.19131	2	E-G	CPSF6 Knock-out
RP11-69H7.2	5.00808	4.1728	1.69195	2.46628	0.0136526	0.0458302	2	E-G	CPSF6 Knock-out
PRKD1	5.05862	1.32786	1.48303	0.895373	0.370588	0.574361	2	E-G	CPSF6 Knock-out
RNU6-610P	5.82886	1.46015	0.768827	1.89919	0.05754	0.147187	2	E-G	CPSF6 Knock-out
DET1	326.885	-0.472199	0.147759	-3.19575	0.00139469	0.00638627	2	E-G	CPSF6 Knock-out
APOBEC3G	6360.38	0.0358829	0.0498845	0.71932	0.471944	0.667518	2	E-G	CPSF6 Knock-out
TAF7	5202.18	-0.0518991	0.0610189	-0.850541	0.395024	0.598946	2	E-G	CPSF6 Knock-out
RP11-620J15.1	76.5053	-0.0514916	0.281397	-0.182986	0.854809	0.930086	2	E-G	CPSF6 Knock-out
MAP4K4	15332.9	0.156023	0.0407697	3.82694	0.000129745	0.000760073	2	E-G	CPSF6 Knock-out
RNA5SP82	7.25207	0.211198	0.686363	0.307705	0.758307	0.873819	2	E-G	CPSF6 Knock-out
RP11-401L13.7	7.86992	-1.65212	1.05999	-1.55862	0.119088	0.259052	2	E-G	CPSF6 Knock-out
NDUFAF4	1193.82	-0.094556	0.133374	-0.708955	0.478353	0.672858	2	E-G	CPSF6 Knock-out
RP11-305L7.5	14.4774	0.20573	0.536641	0.383366	0.701449	0.838932	2	E-G	CPSF6 Knock-out
RP11-423F24.3	37.8092	0.665422	0.342265	1.94417	0.0518745	0.1358	2	E-G	CPSF6 Knock-out
RP11-391L3.3	222.718	-0.315591	0.195274	-1.61615	0.106063	0.237825	2	E-G	CPSF6 Knock-out
DMRTC1B	23.9117	0.471745	0.402208	1.17289	0.24084	0.428667	2	E-G	CPSF6 Knock-out
LCN12	55.4343	-0.145989	0.347751	-0.419809	0.674625	0.820168	2	E-G	CPSF6 Knock-out
RP11-186N15.3	270.332	-0.50013	0.156627	-3.19313	0.00140738	0.00643517	2	E-G	CPSF6 Knock-out
HMGB3P22	69.2769	0.598998	0.300763	1.99159	0.0464156	0.124109	2	E-G	CPSF6 Knock-out
HAP1	24.0998	0.751605	0.513879	1.46261	0.143574	0.297118	2	E-G	CPSF6 Knock-out
TXNDC2	4.37662	4.26136	1.81954	2.342	0.0191807	0.0607817	2	E-G	CPSF6 Knock-out
RPL7AP60	61.8995	-0.285618	0.371611	-0.768595	0.442134	0.642119	2	E-G	CPSF6 Knock-out
MYLK2	63.5886	-0.392998	0.352535	-1.11478	0.264945	0.458404	2	E-G	CPSF6 Knock-out
STON1-GTF2A1L	39.6955	-0.164139	1.32121	-0.124234	0.90113	0.953095	2	E-G	CPSF6 Knock-out
FAM86C2P	132.409	0.138593	0.232736	0.595496	0.551512	0.731574	2	E-G	CPSF6 Knock-out
COCH	185.181	0.433264	0.178947	2.42119	0.0154699	0.0508647	2	E-G	CPSF6 Knock-out
CMB9-22P13.1	435.381	-0.0525707	0.143525	-0.366283	0.714154	0.847177	2	E-G	CPSF6 Knock-out
BABAM1	5208.59	0.0938799	0.06691	1.40308	0.160594	0.322226	2	E-G	CPSF6 Knock-out
CWC27	1269.69	0.0663762	0.08764	0.757373	0.448827	0.647379	2	E-G	CPSF6 Knock-out
UBP1	11005.1	-3.4427e-05	0.0627898	-0.00054829	0.999563	0.999636	2	E-G	CPSF6 Knock-out
NDUFB4P8	6.3987	-2.11781	1.05832	-2.00109	0.0453822	0.12188	2	E-G	CPSF6 Knock-out
BEX5	62.0424	-0.397747	0.341845	-1.16353	0.244615	0.43293	2	E-G	CPSF6 Knock-out
C20orf195	53.1432	1.55253	0.331944	4.67707	2.90999e-06	2.38439e-05	2	E-G	CPSF6 Knock-out
RP11-930P14.2	111.133	0.158337	0.186533	0.848842	0.395969	0.59978	2	E-G	CPSF6 Knock-out
NBPF26	5265.03	-0.0406092	0.05006	-0.811211	0.417244	0.619431	2	E-G	CPSF6 Knock-out
RNU6-316P	7.61371	0.60833	1.01155	0.601384	0.547585	0.728654	2	E-G	CPSF6 Knock-out
AC007228.11	118.791	-0.919656	0.217193	-4.23429	2.29277e-05	0.000157366	2	E-G	CPSF6 Knock-out
CTDSPL	1387.58	-0.849353	0.0800593	-10.6091	2.70479e-26	1.86844e-24	2	E-G	CPSF6 Knock-out
RPA1	14891.7	0.091065	0.0513503	1.77341	0.0761615	0.183708	2	E-G	CPSF6 Knock-out
ANGPTL8	5.23405	-0.246605	1.53635	-0.160514	0.872476	0.939362	2	E-G	CPSF6 Knock-out
ITGA5	8689.48	-0.00912824	0.0758386	-0.120364	0.904195	0.954474	2	E-G	CPSF6 Knock-out
RP1-228P16.1	80.2774	-0.348005	0.2891	-1.20375	0.228686	0.413508	2	E-G	CPSF6 Knock-out
RP4-534N18.2	233.851	-0.0958922	0.17739	-0.540572	0.588803	0.75897	2	E-G	CPSF6 Knock-out
RP11-644F5.10	917.85	-0.421434	0.123966	-3.39959	0.000674879	0.00334485	2	E-G	CPSF6 Knock-out
RP5-837I24.1	108.931	0.335435	0.163267	2.05452	0.0399253	0.109763	2	E-G	CPSF6 Knock-out
TMEM245	15758.6	-0.246164	0.05184	-4.74853	2.04898e-06	1.72692e-05	2	E-G	CPSF6 Knock-out
RPSAP36	12.0192	0.0982849	0.657644	0.14945	0.881199	0.942956	2	E-G	CPSF6 Knock-out
RDH10	3699.32	-0.0456354	0.0866998	-0.526361	0.598637	0.76631	2	E-G	CPSF6 Knock-out
TMED8	10778.8	0.002814	0.063348	0.0444213	0.964569	0.983912	2	E-G	CPSF6 Knock-out
RHOC	6441.47	-0.179691	0.0761875	-2.35854	0.018347	0.0585798	2	E-G	CPSF6 Knock-out
FUOM	600.234	0.251634	0.123817	2.0323	0.0421236	0.114682	2	E-G	CPSF6 Knock-out
TRBV10-3	692.929	-0.0237915	0.114121	-0.208476	0.834857	0.919184	2	E-G	CPSF6 Knock-out
SMARCE1P1	74.7866	-0.0622173	0.359743	-0.17295	0.862691	0.933981	2	E-G	CPSF6 Knock-out
SCML2P2	105.755	-2.01978	0.268232	-7.53	5.07389e-14	1.19794e-12	2	E-G	CPSF6 Knock-out
FTLP12	3.74204	0.357853	1.31908	0.27129	0.786168	0.891131	2	E-G	CPSF6 Knock-out
EGFL7	84.8249	0.632295	0.197207	3.20624	0.0013448	0.0061813	2	E-G	CPSF6 Knock-out
TSN	6353.4	-0.556824	0.0885369	-6.28918	3.19144e-10	4.82224e-09	2	E-G	CPSF6 Knock-out
ZDHHC20P1	5.42598	-3.19078	1.2153	-2.62551	0.00865187	0.0310146	2	E-G	CPSF6 Knock-out
NR2C2AP	1480.94	0.111128	0.0812022	1.36853	0.171145	0.337562	2	E-G	CPSF6 Knock-out
RP11-354P11.3	61.6949	-0.125719	0.293642	-0.428138	0.668551	0.816154	2	E-G	CPSF6 Knock-out
PYCR1	2440.51	0.576076	0.0717825	8.0253	1.01279e-15	2.86147e-14	2	E-G	CPSF6 Knock-out
WDR73	2544.5	-0.0270581	0.0872233	-0.310217	0.756396	0.872625	2	E-G	CPSF6 Knock-out
HABP4	817.41	0.095404	0.0843787	1.13066	0.258196	0.450343	2	E-G	CPSF6 Knock-out
MIR3175	222.071	0.0705255	0.263237	0.267917	0.788763	0.892549	2	E-G	CPSF6 Knock-out
DTNBP1	1738.06	0.174084	0.0577778	3.01299	0.00258686	0.010954	2	E-G	CPSF6 Knock-out
SHISA9	48.2092	1.0015	0.317538	3.15395	0.00161077	0.00724583	2	E-G	CPSF6 Knock-out
LSMEM1	56.0049	1.38753	0.345541	4.01552	5.93143e-05	0.000374361	2	E-G	CPSF6 Knock-out
PAQR3	1692.94	-0.525849	0.190003	-2.76758	0.00564736	0.0215841	2	E-G	CPSF6 Knock-out
RP3-339A18.6	7.6546	0.223806	0.793946	0.28189	0.778028	0.885935	2	E-G	CPSF6 Knock-out
TMEM86A	101.744	-0.0141028	0.245385	-0.0574719	0.954169	0.979058	2	E-G	CPSF6 Knock-out
DNLZ	487.456	-0.163106	0.172916	-0.943267	0.345544	0.548423	2	E-G	CPSF6 Knock-out
TMCO6	2014.53	-0.193244	0.0639993	-3.01948	0.0025321	0.0107474	2	E-G	CPSF6 Knock-out
USP16	6175.85	0.18733	0.0545994	3.43099	0.000601381	0.00301683	2	E-G	CPSF6 Knock-out
ZC3H11A	31914.3	0.134049	0.0389228	3.44398	0.000573213	0.00289211	2	E-G	CPSF6 Knock-out
RP11-1212A22.8	37.0632	0.361724	0.351104	1.03025	0.302893	0.502011	2	E-G	CPSF6 Knock-out
AL391994.1	11.7096	0.134453	0.660859	0.203451	0.838782	0.921678	2	E-G	CPSF6 Knock-out
RP11-282O18.3	497.692	0.127653	0.169645	0.752471	0.451768	0.650018	2	E-G	CPSF6 Knock-out
MTND5P2	55.0124	0.227815	0.33676	0.676491	0.498729	0.689641	2	E-G	CPSF6 Knock-out
CTD-3064H18.4	40.4166	-0.229529	0.349309	-0.657093	0.511121	0.700457	2	E-G	CPSF6 Knock-out
CTD-2113L7.1	20.9022	0.107729	0.595338	0.180954	0.856404	0.930792	2	E-G	CPSF6 Knock-out
RP1-130H16.18	270.471	-0.700507	0.407121	-1.72064	0.0853171	0.200287	2	E-G	CPSF6 Knock-out
ANXA1	7525.64	-0.087738	0.0794009	-1.105	0.269159	0.463445	2	E-G	CPSF6 Knock-out
RP5-1073F15.1	23.806	0.549343	0.433479	1.26729	0.205052	0.383404	2	E-G	CPSF6 Knock-out
RP11-567M16.5	37.1263	-0.564158	0.427228	-1.32051	0.186666	0.358997	2	E-G	CPSF6 Knock-out
TUSC1	50.1941	0.0941478	0.350259	0.268795	0.788087	0.892152	2	E-G	CPSF6 Knock-out
ZNF574	3069.29	0.194306	0.0629803	3.08518	0.00203427	0.00889318	2	E-G	CPSF6 Knock-out
KIAA1456	44.01	1.96702	0.543777	3.61733	0.000297661	0.00160654	2	E-G	CPSF6 Knock-out
MIEF2	843.141	-0.0278439	0.0987944	-0.281837	0.778068	0.885947	2	E-G	CPSF6 Knock-out
KIF11	23417.3	-0.148074	0.0591283	-2.50429	0.0122698	0.0417599	2	E-G	CPSF6 Knock-out
C17orf100	372.211	-0.511542	0.168257	-3.04025	0.00236382	0.0101344	2	E-G	CPSF6 Knock-out
RP4-669P10.20	52.874	-0.992788	0.378819	-2.62074	0.00877388	0.0313604	2	E-G	CPSF6 Knock-out
GNB5	3329.72	-0.584017	0.0609951	-9.57482	1.02039e-21	5.01084e-20	2	E-G	CPSF6 Knock-out
SUMO2P8	7.1405	0.655566	1.15922	0.565522	0.571719	0.746614	2	E-G	CPSF6 Knock-out
TAS2R31	100.134	-0.252659	0.220159	-1.14762	0.251125	0.441255	2	E-G	CPSF6 Knock-out
RPL7P14	16.1887	0.177728	0.590984	0.300733	0.763618	0.877027	2	E-G	CPSF6 Knock-out
MTND1P23	104.721	-0.483458	0.338757	-1.42715	0.153536	0.311768	2	E-G	CPSF6 Knock-out
SYNPO	90.7684	0.536321	0.342883	1.56415	0.117782	0.256913	2	E-G	CPSF6 Knock-out
CD2BP2	7389.84	0.00604948	0.0431287	0.140266	0.88845	0.946188	2	E-G	CPSF6 Knock-out
RP1-29C18.9	292.855	0.169677	0.237342	0.714906	0.474667	0.66986	2	E-G	CPSF6 Knock-out
POU5F2	289.9	0.0620216	0.248256	0.24983	0.802719	0.900836	2	E-G	CPSF6 Knock-out
PSMD10P2	10.4681	0.0295628	0.629913	0.0469316	0.962568	0.982827	2	E-G	CPSF6 Knock-out
RP11-26J3.4	21.7639	0.399269	0.71525	0.558223	0.576692	0.750509	2	E-G	CPSF6 Knock-out
RP11-778D9.4	72.685	0.191283	0.280586	0.681726	0.495412	0.686751	2	E-G	CPSF6 Knock-out
EFTUD2	14643.9	0.24996	0.0466277	5.36076	8.28739e-08	8.8629e-07	2	E-G	CPSF6 Knock-out
RP11-164P12.5	15.9411	-1.89032	0.770753	-2.45257	0.0141842	0.0473599	2	E-G	CPSF6 Knock-out
NRAS	16210.3	-0.274009	0.0773857	-3.54082	0.000398883	0.00208809	2	E-G	CPSF6 Knock-out
TRAJ30	42.5196	-0.12642	0.339385	-0.372496	0.709523	0.844705	2	E-G	CPSF6 Knock-out
APOC1	15.4611	0.0884968	0.840446	0.105297	0.91614	0.96048	2	E-G	CPSF6 Knock-out
CICP19	18.3328	-0.512097	0.397193	-1.28929	0.197296	0.373269	2	E-G	CPSF6 Knock-out
RP11-525K10.3	10.2106	1.01296	1.26719	0.799373	0.424074	0.625582	2	E-G	CPSF6 Knock-out
AC005785.2	197.825	0.0914498	0.230019	0.397574	0.690944	0.832193	2	E-G	CPSF6 Knock-out
LINC00881	121.137	0.63361	0.264734	2.39338	0.016694	0.0542177	2	E-G	CPSF6 Knock-out
AF038458.5	3.58061	4.93061	1.7917	2.75191	0.00592485	0.0224397	2	E-G	CPSF6 Knock-out
ZNF670	490.448	0.401027	0.0828009	4.84327	1.2772e-06	1.11654e-05	2	E-G	CPSF6 Knock-out
UXT	6043.52	0.0438353	0.0641979	0.682815	0.494724	0.686192	2	E-G	CPSF6 Knock-out
CTB-47B11.3	363.09	-0.0996065	0.161756	-0.615784	0.538037	0.721576	2	E-G	CPSF6 Knock-out
C10orf35	205.053	-0.00225924	0.197359	-0.0114474	0.990867	0.995763	2	E-G	CPSF6 Knock-out
GS1-259H13.13	27.0997	-0.0173876	0.686629	-0.0253232	0.979797	0.990762	2	E-G	CPSF6 Knock-out
CALD1	106.511	0.607486	0.340768	1.7827	0.0746357	0.180737	2	E-G	CPSF6 Knock-out
CPB2-AS1	20.8055	-2.03884	0.934903	-2.18081	0.0291976	0.0854303	2	E-G	CPSF6 Knock-out
OSGIN1	39.0182	0.468045	0.655189	0.714366	0.475001	0.670135	2	E-G	CPSF6 Knock-out
RPL29P33	19.3729	0.447916	0.485335	0.9229	0.356059	0.559461	2	E-G	CPSF6 Knock-out
YAE1D1	487.094	-0.179242	0.116786	-1.53479	0.124835	0.268241	2	E-G	CPSF6 Knock-out
GNPDA1	4322.38	0.503964	0.079521	6.3375	2.33524e-10	3.59052e-09	2	E-G	CPSF6 Knock-out
RP11-315I20.1	127.964	-0.155062	0.219545	-0.706287	0.48001	0.674433	2	E-G	CPSF6 Knock-out
IFT43	195.822	-0.199586	0.178433	-1.11855	0.263331	0.456435	2	E-G	CPSF6 Knock-out
GLS2	97.4506	0.250671	0.253365	0.989368	0.322483	0.523879	2	E-G	CPSF6 Knock-out
RP11-385F7.1	3.55428	1.17464	1.42653	0.823421	0.410269	0.612983	2	E-G	CPSF6 Knock-out
CCDC43	2425.22	0.138992	0.0722461	1.92388	0.0543702	0.140726	2	E-G	CPSF6 Knock-out
CECR5	4338.26	0.0826002	0.0744957	1.10879	0.26752	0.461338	2	E-G	CPSF6 Knock-out
CCDC183	146.6	-0.778471	0.22879	-3.40255	0.000667597	0.00331274	2	E-G	CPSF6 Knock-out
MECP2	10952.2	-0.706148	0.0499397	-14.14	2.15221e-45	5.09385e-43	2	E-G	CPSF6 Knock-out
MIR421	71.5943	0.109004	0.326983	0.333362	0.738861	0.862506	2	E-G	CPSF6 Knock-out
RP11-339B21.13	68.1692	0.00689759	0.25675	0.026865	0.978567	0.990227	2	E-G	CPSF6 Knock-out
BUB1B-PAK6	25.6652	2.85159	0.955205	2.98531	0.00283289	0.011858	2	E-G	CPSF6 Knock-out
BACH1-IT3	9.19615	0.731512	0.825025	0.886654	0.375265	0.579113	2	E-G	CPSF6 Knock-out
RP11-224O19.4	12.4203	-0.811094	0.951914	-0.852066	0.394177	0.598239	2	E-G	CPSF6 Knock-out
SUV39H1	5520.61	0.18873	0.0568903	3.31743	0.000908498	0.00435184	2	E-G	CPSF6 Knock-out
CDCA4	6465.33	0.295265	0.0652218	4.52709	5.98003e-06	4.60278e-05	2	E-G	CPSF6 Knock-out
FAM234B	1459.11	0.168456	0.089731	1.87735	0.0604705	0.153085	2	E-G	CPSF6 Knock-out
MGAT3-AS1	3.11974	-2.96954	3.61932	-0.820468	0.411949	0.614858	2	E-G	CPSF6 Knock-out
RP11-252K23.1	22.2025	0.113179	0.502739	0.225125	0.821882	0.911399	2	E-G	CPSF6 Knock-out
RP11-408E5.4	5.23922	2.74585	1.66826	1.64594	0.0997761	0.226648	2	E-G	CPSF6 Knock-out
AC004812.1	6.52559	0.214064	0.761782	0.281004	0.778707	0.88622	2	E-G	CPSF6 Knock-out
SLC35E1P1	40.1892	-1.53051	0.428785	-3.56941	0.000357785	0.00189491	2	E-G	CPSF6 Knock-out
NAALADL2	7.64847	1.09634	0.924951	1.18529	0.235903	0.422405	2	E-G	CPSF6 Knock-out
HNRNPA1P62	33.178	-0.620585	0.375771	-1.6515	0.0986372	0.22466	2	E-G	CPSF6 Knock-out
POP5	1524.19	0.230252	0.0992338	2.3203	0.0203249	0.0637777	2	E-G	CPSF6 Knock-out
LSAMP	7.41492	1.26043	2.41203	0.522559	0.601281	0.768434	2	E-G	CPSF6 Knock-out
MYH7	18.3671	2.53469	0.600166	4.22332	2.40734e-05	0.000164642	2	E-G	CPSF6 Knock-out
RPL29P24	20.713	-0.919138	0.464721	-1.97783	0.0479482	0.127463	2	E-G	CPSF6 Knock-out
RP11-72M17.1	65.2046	0.383577	0.267867	1.43197	0.152153	0.309895	2	E-G	CPSF6 Knock-out
RP11-750H9.5	9.31246	-0.232953	1.02676	-0.226881	0.820516	0.910872	2	E-G	CPSF6 Knock-out
TRAJ5	50.6191	-0.134452	0.317569	-0.423378	0.672019	0.818378	2	E-G	CPSF6 Knock-out
PPP1R13B	1572.87	0.0859656	0.0771823	1.1138	0.265365	0.45902	2	E-G	CPSF6 Knock-out
RP11-466A19.4	13.3848	1.06984	0.763144	1.40189	0.160949	0.322776	2	E-G	CPSF6 Knock-out
RP11-448G4.2	15.2084	-0.588303	0.677406	-0.868465	0.38514	0.588907	2	E-G	CPSF6 Knock-out
LA16c-431H6.7	429.059	-0.120068	0.160994	-0.745791	0.455794	0.653357	2	E-G	CPSF6 Knock-out
VSIG1	246.524	-1.83306	0.184618	-9.92893	3.1158e-23	1.72354e-21	2	E-G	CPSF6 Knock-out
MAP4	32964.7	0.0831447	0.050603	1.64308	0.100367	0.227599	2	E-G	CPSF6 Knock-out
RASSF3	6332.83	-0.263699	0.0770979	-3.42031	0.000625489	0.00312366	2	E-G	CPSF6 Knock-out
RP11-312J18.5	18.4346	0.694188	0.486234	1.42769	0.153383	0.311523	2	E-G	CPSF6 Knock-out
RP1-281H8.3	7.40709	1.33337	1.43922	0.926454	0.35421	0.557435	2	E-G	CPSF6 Knock-out
PCK2	4342.29	-0.289336	0.0756006	-3.82717	0.000129627	0.000759687	2	E-G	CPSF6 Knock-out
ANO9	8010.36	-0.261761	0.0680882	-3.84444	0.000120827	0.000714055	2	E-G	CPSF6 Knock-out
LMAN2L	754.813	0.220103	0.11284	1.95058	0.0511071	0.134242	2	E-G	CPSF6 Knock-out
GGA3	8821.85	0.0839225	0.0348555	2.40773	0.0160521	0.0524031	2	E-G	CPSF6 Knock-out
RP11-384P7.7	3.6024	-2.0024	1.67361	-1.19646	0.231519	0.416907	2	E-G	CPSF6 Knock-out
RP11-331F9.3	104.611	-0.537149	0.289909	-1.85282	0.0639084	0.160034	2	E-G	CPSF6 Knock-out
RP4-791C19.1	29.4777	0.031973	0.36946	0.08654	0.931037	0.967847	2	E-G	CPSF6 Knock-out
RP11-326N17.2	33.6155	-0.0393191	0.572808	-0.0686427	0.945274	0.974344	2	E-G	CPSF6 Knock-out
RN7SL650P	62.8137	-0.340783	0.252182	-1.35134	0.176586	0.344852	2	E-G	CPSF6 Knock-out
ANKRD20A3	160.932	0.789399	0.208353	3.78876	0.000151401	0.000873121	2	E-G	CPSF6 Knock-out
CTSW	1337.82	0.668987	0.108237	6.18074	6.38035e-10	9.25792e-09	2	E-G	CPSF6 Knock-out
IL18BP	1751.88	-0.0535809	0.101421	-0.528301	0.59729	0.765434	2	E-G	CPSF6 Knock-out
RNU6-1284P	9.51255	-0.0579033	0.767069	-0.0754865	0.939828	0.972373	2	E-G	CPSF6 Knock-out
RAI14	57.7588	0.467347	0.375197	1.2456	0.212911	0.393379	2	E-G	CPSF6 Knock-out
BMF	1708.21	0.668509	0.100586	6.64615	3.00859e-11	5.22073e-10	2	E-G	CPSF6 Knock-out
TEKT2	4.44998	1.16103	2.11685	0.54847	0.583369	0.755159	2	E-G	CPSF6 Knock-out
RP11-388P9.3	4.90121	0.578232	1.4896	0.388179	0.697883	0.836512	2	E-G	CPSF6 Knock-out
RP5-1050D4.2	37.5043	-0.305547	0.304363	-1.00389	0.315431	0.516067	2	E-G	CPSF6 Knock-out
IL26	426.842	3.10999	0.208278	14.9319	2.04445e-50	6.21405e-48	2	E-G	CPSF6 Knock-out
RFXAP	1993.87	-0.316981	0.0734734	-4.31423	1.6016e-05	0.000113265	2	E-G	CPSF6 Knock-out
ACTG1	465500	-0.172146	0.0613404	-2.8064	0.00500979	0.0194406	2	E-G	CPSF6 Knock-out
ABCD3	5004.06	0.142851	0.0670891	2.12927	0.0332323	0.0949309	2	E-G	CPSF6 Knock-out
ZNF382	2310.11	-0.428329	0.090033	-4.75747	1.96034e-06	1.65851e-05	2	E-G	CPSF6 Knock-out
ZNF630-AS1	8.14306	0.140632	0.825511	0.170357	0.864729	0.935226	2	E-G	CPSF6 Knock-out
YPEL5	3302.06	-0.0444227	0.0695849	-0.638395	0.523217	0.710408	2	E-G	CPSF6 Knock-out
TGM4	23.6292	-0.567062	0.549023	-1.03286	0.301671	0.500589	2	E-G	CPSF6 Knock-out
CACNA1G	3.8708	-2.17967	2.13985	-1.01861	0.308387	0.508171	2	E-G	CPSF6 Knock-out
MAP2K5	1967.4	-0.254964	0.0669608	-3.80765	0.000140291	0.000815727	2	E-G	CPSF6 Knock-out
C9orf172	1098.17	0.432139	0.112523	3.84046	0.000122802	0.000724254	2	E-G	CPSF6 Knock-out
SEZ6	137.45	-0.269404	0.256015	-1.0523	0.292662	0.490658	2	E-G	CPSF6 Knock-out
RABGAP1L	7847.48	-0.209719	0.0551779	-3.80078	0.000144244	0.000836414	2	E-G	CPSF6 Knock-out
SALL4	16.1362	-0.375457	0.905626	-0.414583	0.678447	0.823358	2	E-G	CPSF6 Knock-out
RP11-440I14.2	2.74928	1.68473	2.36587	0.712095	0.476406	0.671395	2	E-G	CPSF6 Knock-out
RP11-107E5.3	157.401	0.635466	0.27206	2.33576	0.0195038	0.0616162	2	E-G	CPSF6 Knock-out
NFIX	310.231	0.390959	0.20111	1.944	0.0518953	0.13583	2	E-G	CPSF6 Knock-out
LPCAT1	9031.52	0.327037	0.0599244	5.45749	4.8292e-08	5.35702e-07	2	E-G	CPSF6 Knock-out
RGL2	2169.41	-0.229314	0.0630233	-3.63856	0.000274169	0.00149286	2	E-G	CPSF6 Knock-out
PPIL3	3839.57	-0.144649	0.059031	-2.45039	0.0142703	0.047598	2	E-G	CPSF6 Knock-out
U2	117.119	0.272051	0.180585	1.5065	0.131939	0.279184	2	E-G	CPSF6 Knock-out
RP11-691F15.1	8.34369	0.187592	0.868765	0.215929	0.829043	0.915411	2	E-G	CPSF6 Knock-out
FOXD4L5	9.59849	0.650584	0.676149	0.962191	0.335954	0.538917	2	E-G	CPSF6 Knock-out
RP11-798M19.3	57.9568	-0.392817	0.306438	-1.28188	0.199884	0.376519	2	E-G	CPSF6 Knock-out
RPS23P8	1157.98	0.00445085	0.0863864	0.0515226	0.958909	0.980819	2	E-G	CPSF6 Knock-out
MRPS31P4	159.246	-0.0718477	0.187282	-0.383633	0.701251	0.838834	2	E-G	CPSF6 Knock-out
RP11-219D15.3	16.6835	0.0993129	0.555789	0.178688	0.858183	0.931965	2	E-G	CPSF6 Knock-out
NSUN5	3013.07	0.00576903	0.0669109	0.0862195	0.931292	0.967931	2	E-G	CPSF6 Knock-out
AC024937.2	20.2266	1.13555	0.531668	2.13582	0.0326944	0.0935537	2	E-G	CPSF6 Knock-out
ELFN1	3.66314	-3.41727	1.89433	-1.80394	0.0712401	0.174342	2	E-G	CPSF6 Knock-out
ERCC6	6506.96	-0.379662	0.0606162	-6.26337	3.76753e-10	5.63374e-09	2	E-G	CPSF6 Knock-out
RP1-182O16.2	6.06713	-0.601772	1.2471	-0.482536	0.629426	0.789149	2	E-G	CPSF6 Knock-out
FDPS	9021.85	0.0700813	0.0519732	1.34841	0.177526	0.346262	2	E-G	CPSF6 Knock-out
TTC5	1811.72	-0.436018	0.0757466	-5.75627	8.59932e-09	1.06341e-07	2	E-G	CPSF6 Knock-out
UBE2D3P1	16.3266	0.0485064	0.485436	0.0999235	0.920405	0.962222	2	E-G	CPSF6 Knock-out
RP11-84D1.1	524.244	0.710159	0.133934	5.30231	1.14347e-07	1.20065e-06	2	E-G	CPSF6 Knock-out
XPO1	38522.4	0.0722551	0.0558812	1.29301	0.196007	0.371785	2	E-G	CPSF6 Knock-out
RNF167	10500.1	0.179459	0.05191	3.45711	0.000546004	0.00276983	2	E-G	CPSF6 Knock-out
CRYBB3	8.90714	-1.42004	1.24416	-1.14136	0.25372	0.444656	2	E-G	CPSF6 Knock-out
SLC7A6	10444	0.131224	0.0486822	2.69553	0.0070276	0.0259823	2	E-G	CPSF6 Knock-out
PDE2A	38.762	-0.0092247	0.411154	-0.0224361	0.9821	0.991786	2	E-G	CPSF6 Knock-out
MTCYBP28	7.35447	0.930083	1.20802	0.769922	0.441346	0.641169	2	E-G	CPSF6 Knock-out
TMEM177	716.291	0.0960623	0.106451	0.902407	0.366841	0.570442	2	E-G	CPSF6 Knock-out
STIM1	16181.7	0.145854	0.0526267	2.77149	0.00558007	0.0213721	2	E-G	CPSF6 Knock-out
TRAPPC10	11103.1	-0.155901	0.0404278	-3.85628	0.000115125	0.000684281	2	E-G	CPSF6 Knock-out
TTLL4	3598.65	0.222402	0.0582916	3.81533	0.000136	0.000793654	2	E-G	CPSF6 Knock-out
RP11-16E23.3	82.323	-0.0200023	0.309513	-0.064625	0.948473	0.97609	2	E-G	CPSF6 Knock-out
AP002495.1	11.1635	-0.00640971	0.624371	-0.0102659	0.991809	0.996336	2	E-G	CPSF6 Knock-out
RP11-254F7.4	85.3809	-0.375471	0.223777	-1.67788	0.0933714	0.214897	2	E-G	CPSF6 Knock-out
LRP12	446.629	0.918809	0.158465	5.79819	6.70342e-09	8.45072e-08	2	E-G	CPSF6 Knock-out
CAAP1	2181.07	0.0357686	0.0635595	0.562759	0.573599	0.748257	2	E-G	CPSF6 Knock-out
SLC16A7	8987.34	-0.105601	0.0566134	-1.8653	0.0621387	0.156471	2	E-G	CPSF6 Knock-out
RP11-662I13.2	12.6418	1.81126	1.90665	0.949968	0.342129	0.544686	2	E-G	CPSF6 Knock-out
ZNF502	181.808	-0.195214	0.193478	-1.00898	0.312986	0.513377	2	E-G	CPSF6 Knock-out
CUL9	6919.37	-0.12946	0.0454892	-2.84595	0.00442798	0.0174645	2	E-G	CPSF6 Knock-out
AC024084.1	7.09149	0.775886	0.910927	0.851755	0.39435	0.598346	2	E-G	CPSF6 Knock-out
DCAF15	6197.49	-0.0470286	0.0648917	-0.724724	0.468621	0.664511	2	E-G	CPSF6 Knock-out
ZSCAN31	193.289	-0.602793	0.204503	-2.9476	0.00320246	0.0131875	2	E-G	CPSF6 Knock-out
RP11-723D22.3	44.5282	-0.721646	0.352249	-2.04868	0.0404932	0.111134	2	E-G	CPSF6 Knock-out
EIF3D	21952.9	0.181346	0.0587647	3.08597	0.0020289	0.00887377	2	E-G	CPSF6 Knock-out
RP11-480A16.1	1419.57	-0.11377	0.113671	-1.00087	0.316891	0.517763	2	E-G	CPSF6 Knock-out
RP11-139H15.7	42.1749	-0.495324	0.378193	-1.30971	0.190293	0.364106	2	E-G	CPSF6 Knock-out
RP11-254B13.4	179.934	0.232536	0.244545	0.950896	0.341657	0.544265	2	E-G	CPSF6 Knock-out
AC073254.1	54.2759	-0.198584	0.392425	-0.506044	0.612826	0.776384	2	E-G	CPSF6 Knock-out
RP11-414H17.5	26.1054	0.145144	0.518639	0.279855	0.779588	0.886699	2	E-G	CPSF6 Knock-out
CDH20	19.1588	1.38889	0.754519	1.84076	0.0656561	0.163353	2	E-G	CPSF6 Knock-out
AC138744.2	26.0309	-0.658554	0.446844	-1.47379	0.140538	0.292641	2	E-G	CPSF6 Knock-out
DPYD-AS2	43.2452	-0.843392	0.422444	-1.99646	0.0458842	0.122953	2	E-G	CPSF6 Knock-out
PPP2R1B	7284.18	-0.178183	0.0531227	-3.35418	0.000796017	0.00387475	2	E-G	CPSF6 Knock-out
NCAN	3.87345	3.71158	1.3912	2.66789	0.00763293	0.0279377	2	E-G	CPSF6 Knock-out
ERP44	4293.42	0.0791813	0.0609743	1.2986	0.19408	0.369102	2	E-G	CPSF6 Knock-out
AAMDC	180.172	-0.172439	0.185634	-0.928921	0.35293	0.556178	2	E-G	CPSF6 Knock-out
BTLA	2311.86	-0.299733	0.0867447	-3.45535	0.000549581	0.00278651	2	E-G	CPSF6 Knock-out
TMEM222	2544.08	0.258874	0.0593293	4.36335	1.28087e-05	9.21728e-05	2	E-G	CPSF6 Knock-out
IGLV1-40	2.57997	2.33244	2.61568	0.891713	0.372547	0.576241	2	E-G	CPSF6 Knock-out
RP11-405F3.5	13.0319	1.44701	0.840048	1.72253	0.0849727	0.19982	2	E-G	CPSF6 Knock-out
RP11-320M2.1	92.454	-0.261729	0.215316	-1.21556	0.224153	0.407814	2	E-G	CPSF6 Knock-out
GTPBP4	6093.43	0.27963	0.0609705	4.58632	4.51134e-06	3.5543e-05	2	E-G	CPSF6 Knock-out
RNPEPL1	11215.6	-0.182607	0.0783392	-2.33098	0.0197544	0.0622921	2	E-G	CPSF6 Knock-out
AF038458.4	10.2308	0.755214	0.571214	1.32212	0.186127	0.358201	2	E-G	CPSF6 Knock-out
SNX22	568.061	-0.185174	0.423455	-0.437294	0.661898	0.811802	2	E-G	CPSF6 Knock-out
MILR1	6.15925	2.29364	2.70369	0.848338	0.39625	0.60008	2	E-G	CPSF6 Knock-out
RP11-231E19.1	39.794	1.11255	0.439365	2.53218	0.0113356	0.0390777	2	E-G	CPSF6 Knock-out
CTC-378H22.2	189.343	0.284606	0.275242	1.03402	0.301126	0.499886	2	E-G	CPSF6 Knock-out
CYTIP	47630.6	0.548297	0.0569374	9.62982	5.98363e-22	2.99441e-20	2	E-G	CPSF6 Knock-out
RP1-309K20.6	12.129	-0.0570074	0.724327	-0.0787039	0.937268	0.970983	2	E-G	CPSF6 Knock-out
PSMD4	6255.74	0.232486	0.0669704	3.47147	0.000517611	0.00263877	2	E-G	CPSF6 Knock-out
CPS1	212.619	-0.601289	0.191958	-3.1324	0.00173382	0.0077343	2	E-G	CPSF6 Knock-out
C6orf48	4756.72	-0.0155381	0.0592445	-0.262271	0.793112	0.895363	2	E-G	CPSF6 Knock-out
MPL	12.5092	-0.687645	1.00327	-0.685407	0.493087	0.684712	2	E-G	CPSF6 Knock-out
CREBRF	3486.02	-0.125777	0.0564248	-2.22911	0.0258063	0.0773625	2	E-G	CPSF6 Knock-out
QSOX2	4967.9	0.0334577	0.0605558	0.552509	0.5806	0.753305	2	E-G	CPSF6 Knock-out
RP11-305O6.4	137.181	-0.31511	0.213069	-1.47891	0.139164	0.290744	2	E-G	CPSF6 Knock-out
SHISA7	11.3256	2.56177	1.3039	1.96469	0.04945	0.130733	2	E-G	CPSF6 Knock-out
COX7A2	4533.07	0.115104	0.0635626	1.81087	0.0701603	0.172342	2	E-G	CPSF6 Knock-out
CTA-29F11.1	155.047	0.653512	0.211298	3.09284	0.00198249	0.00869039	2	E-G	CPSF6 Knock-out
RP11-428C19.5	5.04063	-5.40634	1.60338	-3.37184	0.000746679	0.00366299	2	E-G	CPSF6 Knock-out
HMGB3	2657.95	-0.36473	0.0827704	-4.40653	1.05041e-05	7.71381e-05	2	E-G	CPSF6 Knock-out
RP11-77H9.2	539.997	-0.106091	0.306545	-0.346087	0.729278	0.856617	2	E-G	CPSF6 Knock-out
KLHDC7B	763.06	-0.331353	0.143406	-2.31059	0.0208556	0.0650752	2	E-G	CPSF6 Knock-out
HK2P1	7.51407	0.85457	0.714115	1.19668	0.23143	0.416772	2	E-G	CPSF6 Knock-out
ERO1B	560.069	-0.153114	0.112275	-1.36373	0.172652	0.339761	2	E-G	CPSF6 Knock-out
LINC01144	113.469	0.387839	0.241214	1.60786	0.107865	0.240994	2	E-G	CPSF6 Knock-out
MIR922	9.77135	0.232871	0.841874	0.27661	0.78208	0.888063	2	E-G	CPSF6 Knock-out
METTL21C	16.3759	-0.184296	0.683472	-0.269647	0.787432	0.891833	2	E-G	CPSF6 Knock-out
PNKDP1	13.0372	-0.956762	0.745401	-1.28355	0.199298	0.375783	2	E-G	CPSF6 Knock-out
ARC	205.186	2.25351	0.615511	3.66119	0.000251042	0.00137726	2	E-G	CPSF6 Knock-out
RP3-323B6.1	10.747	0.321611	0.851542	0.377681	0.705668	0.842129	2	E-G	CPSF6 Knock-out
RP11-367N14.2	50.8765	-0.50176	0.296374	-1.693	0.090456	0.209607	2	E-G	CPSF6 Knock-out
RP11-529E10.6	66.2385	-0.34197	0.390215	-0.876362	0.380833	0.584146	2	E-G	CPSF6 Knock-out
CH507-513H4.5	37177.7	0.333651	1.06508	0.313264	0.75408	0.871311	2	E-G	CPSF6 Knock-out
IQCG	1523.65	-0.0477864	0.0775898	-0.615886	0.53797	0.721566	2	E-G	CPSF6 Knock-out
RP4-584D14.5	47.6119	0.855215	0.275691	3.10207	0.00192171	0.00845848	2	E-G	CPSF6 Knock-out
SNHG25	122.088	0.535364	0.251444	2.12916	0.0332414	0.0949309	2	E-G	CPSF6 Knock-out
CTD-2006H14.2	157.766	-0.931875	0.241437	-3.8597	0.000113526	0.000675813	2	E-G	CPSF6 Knock-out
ARHGAP19-SLIT1	28.3507	0.966082	0.578993	1.66856	0.0952056	0.218249	2	E-G	CPSF6 Knock-out
FBXO25	2535.5	-0.0943982	0.0604377	-1.56191	0.118309	0.257691	2	E-G	CPSF6 Knock-out
VPS51	11051	0.042188	0.0685115	0.615779	0.53804	0.721576	2	E-G	CPSF6 Knock-out
PNMA2	1049.78	0.301934	0.119382	2.52913	0.0114344	0.0393481	2	E-G	CPSF6 Knock-out
PSPC1P1	52.76	-0.83105	0.2769	-3.00127	0.00268856	0.011315	2	E-G	CPSF6 Knock-out
PRDM2	14185.2	0.319426	0.0504301	6.33404	2.38819e-10	3.66608e-09	2	E-G	CPSF6 Knock-out
RP11-677M14.2	48.1404	-0.443242	0.316419	-1.40081	0.161272	0.32325	2	E-G	CPSF6 Knock-out
RP11-159H22.2	14.3831	5.49734	1.2877	4.26911	1.96255e-05	0.000136321	2	E-G	CPSF6 Knock-out
RNA5SP383	12.3925	-1.04868	0.565258	-1.85523	0.0635636	0.159313	2	E-G	CPSF6 Knock-out
RP11-98G13.1	5.93027	-0.388004	1.75559	-0.22101	0.825084	0.913274	2	E-G	CPSF6 Knock-out
PXMP4	1208.19	-0.359	0.0997878	-3.59763	0.000321124	0.00171871	2	E-G	CPSF6 Knock-out
RP11-1079K10.2	6.68588	-1.7886	1.11027	-1.61096	0.107189	0.239818	2	E-G	CPSF6 Knock-out
TCEA3	1501.29	-0.89224	0.107213	-8.32209	8.64221e-17	2.72428e-15	2	E-G	CPSF6 Knock-out
PPEF1	5.65164	-0.574058	1.76097	-0.32599	0.744432	0.865566	2	E-G	CPSF6 Knock-out
PSMD6-AS2	1415.37	1.38212	0.144648	9.55501	1.23571e-21	6.0069e-20	2	E-G	CPSF6 Knock-out
ANKLE1	819.578	0.485694	0.091731	5.29476	1.19171e-07	1.24812e-06	2	E-G	CPSF6 Knock-out
RPS6KA2-AS1	19.8341	-2.03089	0.639661	-3.17495	0.00149864	0.00680612	2	E-G	CPSF6 Knock-out
WDR13	2312.59	0.142551	0.0596449	2.39	0.0168486	0.0545895	2	E-G	CPSF6 Knock-out
RP4-756H11.3	113.731	-0.0753576	0.200087	-0.376624	0.706453	0.842761	2	E-G	CPSF6 Knock-out
CYP26C1	12.2072	2.55296	2.11644	1.20625	0.22772	0.412304	2	E-G	CPSF6 Knock-out
ALDH18A1	14611.3	0.133601	0.0595296	2.24429	0.024814	0.0749326	2	E-G	CPSF6 Knock-out
RP11-543B16.1	16.7915	-0.044976	0.465157	-0.0966899	0.922973	0.963535	2	E-G	CPSF6 Knock-out
LINC01389	23.1733	-0.41742	0.480952	-0.867904	0.385447	0.589114	2	E-G	CPSF6 Knock-out
RP11-474P2.5	76.4187	-0.0259412	0.307371	-0.0843968	0.932741	0.968739	2	E-G	CPSF6 Knock-out
DAGLA	13.1014	1.06012	0.94688	1.1196	0.262886	0.455961	2	E-G	CPSF6 Knock-out
ID3	869.797	-0.0704386	0.153191	-0.45981	0.645653	0.801067	2	E-G	CPSF6 Knock-out
CTB-58E17.5	39.0553	0.623795	0.478477	1.30371	0.192333	0.366744	2	E-G	CPSF6 Knock-out
FAM9C	38.8194	-1.34913	0.640563	-2.10617	0.0351899	0.0992972	2	E-G	CPSF6 Knock-out
FTLP6	34.5498	-0.722404	0.487413	-1.48212	0.138309	0.289333	2	E-G	CPSF6 Knock-out
MT-TM	43.7901	0.16289	0.27874	0.584381	0.558964	0.737259	2	E-G	CPSF6 Knock-out
MARK2P8	154.689	0.206547	0.178143	1.15945	0.246274	0.435092	2	E-G	CPSF6 Knock-out
GOLGA8UP	46.9108	0.526366	0.350437	1.50203	0.13309	0.281063	2	E-G	CPSF6 Knock-out
TARS2	3730.05	-0.000540937	0.0588562	-0.00919082	0.992667	0.996705	2	E-G	CPSF6 Knock-out
AC109486.1	9.05901	0.311692	0.594403	0.524379	0.600015	0.767257	2	E-G	CPSF6 Knock-out
FLJ30679	17.7363	0.549649	0.793193	0.692957	0.488336	0.680602	2	E-G	CPSF6 Knock-out
DNAJC19	1636.82	-0.176324	0.0960416	-1.83591	0.0663704	0.164671	2	E-G	CPSF6 Knock-out
RP11-141C7.3	431.398	-0.334936	0.183358	-1.82668	0.0677478	0.167427	2	E-G	CPSF6 Knock-out
SNORD82	28.7093	-0.547019	0.381699	-1.43312	0.151824	0.309443	2	E-G	CPSF6 Knock-out
RP11-410L14.1	52.8106	-0.534075	0.358091	-1.49145	0.135843	0.285332	2	E-G	CPSF6 Knock-out
STAU1	12616.8	0.44898	0.0492774	9.11128	8.14186e-20	3.43708e-18	2	E-G	CPSF6 Knock-out
SEC22C	5321.95	-0.531635	0.0528126	-10.0665	7.77315e-24	4.58061e-22	2	E-G	CPSF6 Knock-out
RP11-193F5.4	27.1516	-3.5833	0.694981	-5.15597	2.52319e-07	2.50626e-06	2	E-G	CPSF6 Knock-out
C20orf173	11.3653	0.111139	0.948603	0.11716	0.906733	0.955858	2	E-G	CPSF6 Knock-out
UGCG	3570.22	0.0810685	0.0661918	1.22475	0.220669	0.403374	2	E-G	CPSF6 Knock-out
RP11-297C4.6	135.591	-0.306758	0.315467	-0.972394	0.330855	0.533383	2	E-G	CPSF6 Knock-out
RP11-429E11.3	55.9871	-0.865882	0.382381	-2.26445	0.0235465	0.0718295	2	E-G	CPSF6 Knock-out
TOP3A	8446.79	0.33796	0.0538993	6.27021	3.60554e-10	5.39709e-09	2	E-G	CPSF6 Knock-out
RIPPLY3	16.3749	0.0731922	0.799427	0.0915559	0.927051	0.965678	2	E-G	CPSF6 Knock-out
CRK	3633.25	0.285261	0.0644369	4.42698	9.55627e-06	7.06433e-05	2	E-G	CPSF6 Knock-out
CKLF	2171.56	0.535544	0.0823076	6.50662	7.68604e-11	1.26892e-09	2	E-G	CPSF6 Knock-out
PCCA	1137.92	-0.22846	0.100115	-2.28197	0.0224911	0.0692135	2	E-G	CPSF6 Knock-out
BCORL1	2638.08	0.347464	0.0726344	4.78374	1.72066e-06	1.47606e-05	2	E-G	CPSF6 Knock-out
ACOT4	199.152	-0.055048	0.205346	-0.268075	0.788642	0.892521	2	E-G	CPSF6 Knock-out
BRD9	5660.58	0.040727	0.0575974	0.707097	0.479506	0.673956	2	E-G	CPSF6 Knock-out
GCSH	517.576	-0.0577889	0.137439	-0.420468	0.674143	0.819868	2	E-G	CPSF6 Knock-out
CD22	470.012	1.36545	0.169971	8.03346	9.47633e-16	2.68264e-14	2	E-G	CPSF6 Knock-out
TOR1AIP2	11296.4	0.156824	0.037579	4.17319	3.00369e-05	0.000201795	2	E-G	CPSF6 Knock-out
TRAJ47	22.51	0.680293	0.463505	1.46771	0.142182	0.29517	2	E-G	CPSF6 Knock-out
MIR1976	6.5874	-0.791648	0.675599	-1.17177	0.241288	0.429226	2	E-G	CPSF6 Knock-out
CCDC69	10101.5	-0.0788889	0.0614174	-1.28447	0.198977	0.375457	2	E-G	CPSF6 Knock-out
ARHGEF9	1612.32	-1.2045	0.0944923	-12.747	3.23772e-37	4.92049e-35	2	E-G	CPSF6 Knock-out
TNFAIP8L1	5001.01	0.0920825	0.0513823	1.79211	0.0731159	0.177892	2	E-G	CPSF6 Knock-out
SORBS1	226.646	1.047	0.186652	5.60937	2.03062e-08	2.38932e-07	2	E-G	CPSF6 Knock-out
BLOC1S2	3275.63	0.0726022	0.0725013	1.00139	0.316637	0.517483	2	E-G	CPSF6 Knock-out
SNAI3-AS1	565.741	-0.172529	0.137533	-1.25445	0.209677	0.389553	2	E-G	CPSF6 Knock-out
CRIM1	1067.23	0.616989	0.107897	5.71834	1.07571e-08	1.31782e-07	2	E-G	CPSF6 Knock-out
ZNF829	1360.77	-0.00482809	0.0855056	-0.0564652	0.954971	0.979289	2	E-G	CPSF6 Knock-out
KAT2B	5581.47	0.129897	0.0538955	2.41016	0.0159457	0.0521207	2	E-G	CPSF6 Knock-out
CTD-2287O16.1	118.557	0.285224	0.304428	0.936917	0.348801	0.551824	2	E-G	CPSF6 Knock-out
RIF1	26961.1	-0.0646963	0.0440362	-1.46916	0.141788	0.294437	2	E-G	CPSF6 Knock-out
AK4P3	367.599	0.585659	0.119376	4.90602	9.29433e-07	8.32942e-06	2	E-G	CPSF6 Knock-out
RN7SKP264	8.9759	0.0185374	0.913061	0.0203024	0.983802	0.992568	2	E-G	CPSF6 Knock-out
RP11-326C3.4	5.89371	-0.883167	1.66553	-0.530262	0.59593	0.7642	2	E-G	CPSF6 Knock-out
SOX30	80.5562	0.108282	0.287809	0.37623	0.706746	0.842928	2	E-G	CPSF6 Knock-out
IVNS1ABP	34532.4	0.702919	0.0479813	14.6499	1.35011e-48	3.822e-46	2	E-G	CPSF6 Knock-out
CTD-2369P2.5	29.1295	0.937462	0.512474	1.82929	0.0673567	0.166703	2	E-G	CPSF6 Knock-out
PHF23	4690.75	0.0065306	0.0530113	0.123193	0.901955	0.953467	2	E-G	CPSF6 Knock-out
AC006116.20	140.353	-0.706943	0.190936	-3.7025	0.000213484	0.00119141	2	E-G	CPSF6 Knock-out
TRAJ8	32.9893	-0.161466	0.375972	-0.429462	0.667587	0.815664	2	E-G	CPSF6 Knock-out
PANO1	207.928	-0.170155	0.203772	-0.835028	0.403702	0.606751	2	E-G	CPSF6 Knock-out
SLC35A3	2738.17	-0.745141	0.0919022	-8.10799	5.1466e-16	1.50565e-14	2	E-G	CPSF6 Knock-out
TRAV8-2	573.921	0.352026	0.108059	3.25772	0.00112312	0.00525355	2	E-G	CPSF6 Knock-out
C9orf47	28.9464	0.179005	0.450294	0.397529	0.690978	0.832199	2	E-G	CPSF6 Knock-out
RP11-555K12.2	7.29326	-0.628097	1.05807	-0.593626	0.552762	0.732795	2	E-G	CPSF6 Knock-out
ATP5F1P1	39.3085	-0.160845	0.457391	-0.351658	0.725095	0.853813	2	E-G	CPSF6 Knock-out
TTI1	5308.43	0.294297	0.0616898	4.77059	1.83684e-06	1.56549e-05	2	E-G	CPSF6 Knock-out
AHCYL1	13434.5	0.439038	0.0459286	9.55914	1.18734e-21	5.79129e-20	2	E-G	CPSF6 Knock-out
ZNF37BP	5300.51	-0.206661	0.0574087	-3.59983	0.000318425	0.00170616	2	E-G	CPSF6 Knock-out
RP4-761J14.8	2478.47	0.0933594	0.105795	0.882457	0.37753	0.581112	2	E-G	CPSF6 Knock-out
ADM	2289.17	1.47023	0.26662	5.51431	3.50143e-08	3.9789e-07	2	E-G	CPSF6 Knock-out
RFPL3S	55.3507	-0.397315	0.367063	-1.08242	0.279067	0.475065	2	E-G	CPSF6 Knock-out
FAM126B	6760.02	-0.0850837	0.0530712	-1.6032	0.108891	0.242666	2	E-G	CPSF6 Knock-out
GLE1	9853.58	-0.225683	0.0593619	-3.80181	0.00014364	0.000833523	2	E-G	CPSF6 Knock-out
CDKN1C	60.5999	0.185365	0.405456	0.457177	0.647544	0.802182	2	E-G	CPSF6 Knock-out
C19orf35	131.983	0.783672	0.247747	3.1632	0.00156045	0.00705135	2	E-G	CPSF6 Knock-out
RP11-646I6.6	52.5677	-0.321105	0.394768	-0.813402	0.415988	0.618338	2	E-G	CPSF6 Knock-out
RP11-192P3.4	18.3344	0.159183	0.896131	0.177634	0.859011	0.932237	2	E-G	CPSF6 Knock-out
RUNDC3B	158.837	0.111321	0.254304	0.437745	0.661571	0.811644	2	E-G	CPSF6 Knock-out
SLC25A35	563.537	-0.886834	0.145441	-6.09753	1.07717e-09	1.50767e-08	2	E-G	CPSF6 Knock-out
MFSD1	1853.48	-0.0909512	0.0951811	-0.95556	0.339295	0.541924	2	E-G	CPSF6 Knock-out
RP4-583P15.16	99.3819	-0.627849	0.228847	-2.74353	0.00607831	0.0229637	2	E-G	CPSF6 Knock-out
ANKRD1	11.5498	-0.400151	0.613617	-0.652118	0.514325	0.703263	2	E-G	CPSF6 Knock-out
NIPAL4	471.396	0.932168	0.183451	5.08131	3.7485e-07	3.59833e-06	2	E-G	CPSF6 Knock-out
RP1-63M2.7	69.2807	1.14125	0.352007	3.24212	0.00118644	0.00552201	2	E-G	CPSF6 Knock-out
RP11-15B24.5	3.66162	-0.598874	1.49892	-0.399536	0.689498	0.831271	2	E-G	CPSF6 Knock-out
AC025335.1	771.632	0.0534782	0.0946333	0.56511	0.571999	0.746901	2	E-G	CPSF6 Knock-out
TRAJ45	35.6149	0.00328653	0.378311	0.00868736	0.993069	0.996901	2	E-G	CPSF6 Knock-out
RP3-395M20.3	28.5005	0.0793816	0.535534	0.148229	0.882162	0.943523	2	E-G	CPSF6 Knock-out
EEF1A1P6	35981.7	0.033018	0.0598432	0.551742	0.581125	0.75375	2	E-G	CPSF6 Knock-out
PROZ	47.5561	-0.164878	0.334656	-0.492679	0.62224	0.783703	2	E-G	CPSF6 Knock-out
PSMB8-AS1	2779.32	-0.420467	0.0648657	-6.48211	9.04469e-11	1.47969e-09	2	E-G	CPSF6 Knock-out
PHACTR2-AS1	214.361	-0.173767	0.210723	-0.824621	0.409587	0.612344	2	E-G	CPSF6 Knock-out
WNK2	86.262	1.25518	0.32304	3.88553	0.000102107	0.000612962	2	E-G	CPSF6 Knock-out
IQCC	973.912	0.0131668	0.0935015	0.140819	0.888013	0.946106	2	E-G	CPSF6 Knock-out
WBP1LP1	12.2887	-0.0624812	0.905975	-0.0689657	0.945017	0.97434	2	E-G	CPSF6 Knock-out
CALM3	59327	-0.270592	0.0549856	-4.92115	8.60379e-07	7.75649e-06	2	E-G	CPSF6 Knock-out
RP11-74D7.1	22.6787	0.87498	0.843825	1.03692	0.299773	0.498384	2	E-G	CPSF6 Knock-out
TECPR1	5655.08	-0.214603	0.0579905	-3.70066	0.000215035	0.00119914	2	E-G	CPSF6 Knock-out
EPB41L5	640.084	0.0468512	0.116417	0.402444	0.687357	0.829855	2	E-G	CPSF6 Knock-out
ZDHHC20-IT1	29.2049	-0.13344	0.42321	-0.315304	0.752531	0.870287	2	E-G	CPSF6 Knock-out
SLC16A5	865.387	-0.0808422	0.0985649	-0.820193	0.412106	0.61506	2	E-G	CPSF6 Knock-out
RP11-261C10.5	43.2239	0.374367	0.352228	1.06285	0.287848	0.485094	2	E-G	CPSF6 Knock-out
OSMR	153.758	1.29718	0.245833	5.27666	1.31558e-07	1.36547e-06	2	E-G	CPSF6 Knock-out
SHOC2	8697.64	0.0873744	0.050979	1.71393	0.0865417	0.202577	2	E-G	CPSF6 Knock-out
SMARCA5-AS1	29.737	0.22579	0.431248	0.523573	0.600576	0.767736	2	E-G	CPSF6 Knock-out
CREB1	12832	-0.589221	0.0679102	-8.67648	4.0821e-18	1.49015e-16	2	E-G	CPSF6 Knock-out
HNRNPA1P53	10.6782	0.820997	0.949255	0.864886	0.387101	0.591091	2	E-G	CPSF6 Knock-out
PACS2	4599.52	-0.0185629	0.0468406	-0.396298	0.691885	0.832833	2	E-G	CPSF6 Knock-out
RP3-469D22.1	13.0116	-0.31078	0.51454	-0.603996	0.545846	0.7274	2	E-G	CPSF6 Knock-out
C1orf106	4.34965	0.731978	1.69373	0.43217	0.665618	0.814188	2	E-G	CPSF6 Knock-out
RP11-63M22.1	55.7077	-0.497299	0.438941	-1.13295	0.257235	0.449007	2	E-G	CPSF6 Knock-out
MAP6D1	171.213	0.956261	0.25205	3.79394	0.000148275	0.000857488	2	E-G	CPSF6 Knock-out
COG2	3559.49	0.0315932	0.0504257	0.626529	0.530968	0.716906	2	E-G	CPSF6 Knock-out
RP11-507J18.5	32.8831	-0.262693	0.501849	-0.523449	0.600662	0.767778	2	E-G	CPSF6 Knock-out
RP11-13N13.5	26.2299	-0.672651	0.464796	-1.4472	0.147842	0.303601	2	E-G	CPSF6 Knock-out
HNRNPA1L2	1169.16	-0.444525	0.478674	-0.928658	0.353066	0.556332	2	E-G	CPSF6 Knock-out
RP11-347C12.9	6.55212	-0.717296	1.03703	-0.691686	0.489134	0.681391	2	E-G	CPSF6 Knock-out
LINC00954	662.901	-1.20191	0.132366	-9.08015	1.08427e-19	4.52433e-18	2	E-G	CPSF6 Knock-out
RP11-15P13.1	16.6107	-0.249682	0.812427	-0.307329	0.758593	0.873833	2	E-G	CPSF6 Knock-out
HIST1H1A	2337.79	-0.219539	0.0853995	-2.57073	0.0101483	0.0354633	2	E-G	CPSF6 Knock-out
SCAMP3	5561.67	0.278746	0.0462906	6.02164	1.72656e-09	2.36053e-08	2	E-G	CPSF6 Knock-out
RP11-61K12.2	3.91267	-0.349909	1.93234	-0.181081	0.856304	0.930792	2	E-G	CPSF6 Knock-out
TMSB4X	276278	-0.129298	0.0677167	-1.9094	0.056211	0.144532	2	E-G	CPSF6 Knock-out
AP003068.18	39.7788	-0.453523	0.353644	-1.28243	0.199692	0.376318	2	E-G	CPSF6 Knock-out
KCNJ11	24.1306	-0.731986	0.5591	-1.30922	0.190459	0.364254	2	E-G	CPSF6 Knock-out
EFEMP2	1919.82	-0.322479	0.096871	-3.32895	0.000871731	0.00419437	2	E-G	CPSF6 Knock-out
MAK16	5373.98	0.197616	0.0740667	2.66808	0.00762858	0.0279289	2	E-G	CPSF6 Knock-out
RPS20	43997	0.101501	0.0595382	1.70481	0.0882302	0.205738	2	E-G	CPSF6 Knock-out
ST13P6	13.6227	-0.12723	0.542441	-0.234552	0.814557	0.907394	2	E-G	CPSF6 Knock-out
RWDD3	980.329	-0.283163	0.0782528	-3.61857	0.000296233	0.00160002	2	E-G	CPSF6 Knock-out
ASPSCR1	2072.47	-0.194893	0.0669956	-2.90904	0.00362535	0.0146943	2	E-G	CPSF6 Knock-out
MUC12	127.528	-0.713748	0.284475	-2.509	0.0121074	0.0412788	2	E-G	CPSF6 Knock-out
AC006942.4	43.0139	-0.506595	0.313315	-1.61689	0.105902	0.237583	2	E-G	CPSF6 Knock-out
KRT8P12	241.092	-0.0306727	0.147827	-0.207491	0.835626	0.919644	2	E-G	CPSF6 Knock-out
RP11-179A10.2	3.90038	-2.19038	1.82232	-1.20197	0.229374	0.414422	2	E-G	CPSF6 Knock-out
FBXO39	12.8312	-1.51212	1.17298	-1.28912	0.197356	0.373307	2	E-G	CPSF6 Knock-out
CTD-2201E18.5	17.9223	-0.467995	0.54954	-0.851612	0.394429	0.598375	2	E-G	CPSF6 Knock-out
RP1-161P9.5	4.51498	1.69129	1.70729	0.990632	0.321865	0.523362	2	E-G	CPSF6 Knock-out
AC024568.1	9.17927	0.389512	0.844816	0.461061	0.644755	0.800504	2	E-G	CPSF6 Knock-out
UPF3BP4	17.2656	0.0884367	0.506495	0.174605	0.86139	0.933587	2	E-G	CPSF6 Knock-out
AHI1	5514.61	0.842529	0.062383	13.5057	1.44642e-41	2.84119e-39	2	E-G	CPSF6 Knock-out
NRM	3583.27	0.112138	0.0744128	1.50697	0.131818	0.278989	2	E-G	CPSF6 Knock-out
TTC25	55.8353	-0.600896	0.316535	-1.89836	0.0576492	0.147442	2	E-G	CPSF6 Knock-out
LARP4P	40.3072	-0.704907	0.545658	-1.29185	0.19641	0.372135	2	E-G	CPSF6 Knock-out
RP11-513D5.2	21.2597	-1.76124	0.578782	-3.04301	0.00234226	0.0100539	2	E-G	CPSF6 Knock-out
RP11-98D18.7	11.6733	-0.205528	0.74037	-0.277602	0.781318	0.887591	2	E-G	CPSF6 Knock-out
AC012358.8	77.8337	0.173669	0.233444	0.743944	0.456911	0.654583	2	E-G	CPSF6 Knock-out
ARHGAP30	30499.1	0.0265929	0.0539697	0.492737	0.622198	0.783703	2	E-G	CPSF6 Knock-out
CIDECP	366.123	0.0858047	0.165717	0.517779	0.604613	0.770623	2	E-G	CPSF6 Knock-out
VOPP1	12211.6	0.576877	0.0579839	9.94892	2.54935e-23	1.41601e-21	2	E-G	CPSF6 Knock-out
ZFP3	1286.37	-0.187133	0.0871354	-2.14761	0.0317446	0.0913336	2	E-G	CPSF6 Knock-out
HMCES	4982.29	-0.0183728	0.0683418	-0.268837	0.788055	0.892152	2	E-G	CPSF6 Knock-out
ZNF326	4092.14	-0.788352	0.0562186	-14.023	1.12787e-44	2.54433e-42	2	E-G	CPSF6 Knock-out
GBP1P1	22.4739	-1.41265	0.674711	-2.09372	0.036285	0.10184	2	E-G	CPSF6 Knock-out
RP11-503E24.2	209.147	0.0316082	0.206854	0.152804	0.878553	0.941796	2	E-G	CPSF6 Knock-out
RP11-29H23.7	50.6227	0.192487	0.370229	0.519914	0.603123	0.7698	2	E-G	CPSF6 Knock-out
AC090616.2	19.7543	0.8386	0.519282	1.61492	0.106328	0.238352	2	E-G	CPSF6 Knock-out
RP11-700A24.1	108.839	-0.175051	0.218721	-0.800337	0.423515	0.624886	2	E-G	CPSF6 Knock-out
SEMA6B	4.66351	0.508438	1.85834	0.273598	0.784393	0.88985	2	E-G	CPSF6 Knock-out
BEX2	303.234	0.239618	0.163951	1.46152	0.143873	0.297568	2	E-G	CPSF6 Knock-out
CCDC25	3659.33	-0.272557	0.0872488	-3.12391	0.00178466	0.00792923	2	E-G	CPSF6 Knock-out
RP11-958N24.1	7239.75	0.0554719	0.0696643	0.796274	0.425873	0.627028	2	E-G	CPSF6 Knock-out
CLPTM1L	9493.63	-0.0648727	0.0678916	-0.955533	0.339308	0.541924	2	E-G	CPSF6 Knock-out
RP11-543P15.1	127.159	0.0435853	0.213534	0.204114	0.838264	0.921248	2	E-G	CPSF6 Knock-out
BRCA1	16982.4	-0.227163	0.0419668	-5.41292	6.20048e-08	6.77408e-07	2	E-G	CPSF6 Knock-out
RP11-140I16.3	28.0659	-0.321229	0.485157	-0.662114	0.507898	0.697563	2	E-G	CPSF6 Knock-out
SNORA48	19.3327	-0.906686	0.54799	-1.65457	0.0980126	0.223512	2	E-G	CPSF6 Knock-out
PCBP4	3005.08	0.117375	0.0692895	1.69399	0.0902681	0.209374	2	E-G	CPSF6 Knock-out
AL139099.2	1135.49	0.539201	0.455012	1.18503	0.236008	0.422565	2	E-G	CPSF6 Knock-out
SF3A3	9503.61	0.0716606	0.0575254	1.24572	0.212867	0.393379	2	E-G	CPSF6 Knock-out
HERC1	17723.9	-0.104567	0.0474347	-2.20443	0.0274938	0.0813738	2	E-G	CPSF6 Knock-out
NME2P1	6.35724	-0.355973	0.794969	-0.447782	0.65431	0.806387	2	E-G	CPSF6 Knock-out
RBM10	8618.43	-0.041661	0.0578709	-0.719894	0.47159	0.66741	2	E-G	CPSF6 Knock-out
RASSF1-AS1	178.282	-0.00710252	0.194699	-0.0364796	0.9709	0.986476	2	E-G	CPSF6 Knock-out
EEF2	282173	-0.0818296	0.0617252	-1.32571	0.184936	0.356716	2	E-G	CPSF6 Knock-out
SLC9A5	900.737	0.221171	0.0869359	2.54407	0.0109568	0.0379033	2	E-G	CPSF6 Knock-out
ZNF785	1799.88	0.347591	0.120282	2.88981	0.00385481	0.0154917	2	E-G	CPSF6 Knock-out
NAP1L1P2	2.66617	0.320791	2.41319	0.132932	0.894247	0.949481	2	E-G	CPSF6 Knock-out
RP11-442G21.2	30.2405	0.833576	0.575179	1.44925	0.147269	0.302661	2	E-G	CPSF6 Knock-out
EFNA1	63.5591	0.74118	0.322342	2.29936	0.0214846	0.0666888	2	E-G	CPSF6 Knock-out
CPSF1	17304	-0.040746	0.0497278	-0.81938	0.412569	0.615377	2	E-G	CPSF6 Knock-out
LINC00282	36.8419	-1.21615	0.537688	-2.26181	0.0237094	0.0722237	2	E-G	CPSF6 Knock-out
U4	17.8564	-0.626455	0.531011	-1.17974	0.238103	0.425236	2	E-G	CPSF6 Knock-out
AC010287.1	156.063	-0.390302	0.263646	-1.4804	0.138766	0.2901	2	E-G	CPSF6 Knock-out
RPL32P1	12.9614	-0.458525	0.717168	-0.639355	0.522592	0.709843	2	E-G	CPSF6 Knock-out
PAPOLB	6.46513	1.47711	1.18576	1.24571	0.212872	0.393379	2	E-G	CPSF6 Knock-out
AGGF1P3	6.59159	0.376256	1.00989	0.372571	0.709468	0.844675	2	E-G	CPSF6 Knock-out
TPTEP1	21.5525	-0.163265	0.527297	-0.309626	0.756845	0.872899	2	E-G	CPSF6 Knock-out
RNF121	2026.26	0.386951	0.0622906	6.21202	5.23075e-10	7.67079e-09	2	E-G	CPSF6 Knock-out
TBPL1	1588.98	-0.0912327	0.0914875	-0.997215	0.31866	0.519789	2	E-G	CPSF6 Knock-out
TMEM256	1398.43	0.260333	0.0901733	2.88703	0.00388903	0.0156096	2	E-G	CPSF6 Knock-out
FOXRED2	3445.5	0.254517	0.0707015	3.59988	0.000318359	0.00170613	2	E-G	CPSF6 Knock-out
CTD-2306A12.1	12.3607	0.0272335	0.849348	0.032064	0.974421	0.988005	2	E-G	CPSF6 Knock-out
AGO1	14534	0.208159	0.0443587	4.69264	2.69705e-06	2.2238e-05	2	E-G	CPSF6 Knock-out
CELP	36.491	-0.555356	0.348901	-1.59173	0.111445	0.24657	2	E-G	CPSF6 Knock-out
SLC9B2	2981.78	0.119225	0.0597311	1.99602	0.0459312	0.123042	2	E-G	CPSF6 Knock-out
PMS2P7	290.661	-0.459727	0.130398	-3.52556	0.000422583	0.00219501	2	E-G	CPSF6 Knock-out
ADAM15	4656.54	0.216302	0.0757291	2.85626	0.00428666	0.016993	2	E-G	CPSF6 Knock-out
RP11-24C3.2	15.6625	0.555156	0.70156	0.791317	0.428759	0.629476	2	E-G	CPSF6 Knock-out
SEMA4C	1481.72	0.18622	0.096415	1.93144	0.0534287	0.138874	2	E-G	CPSF6 Knock-out
RGS9BP	90.5542	-1.15172	0.312631	-3.68395	0.000229646	0.0012708	2	E-G	CPSF6 Knock-out
LMF1	1234.31	-0.107865	0.0886597	-1.21662	0.223748	0.407436	2	E-G	CPSF6 Knock-out
RNA5SP268	9.93946	0.00733158	0.71159	0.0103031	0.991779	0.996336	2	E-G	CPSF6 Knock-out
RPL21P1	34.3137	0.0271773	0.402107	0.0675874	0.946114	0.974734	2	E-G	CPSF6 Knock-out
RP11-477G18.2	41.3623	-0.277995	0.412492	-0.673941	0.500349	0.690875	2	E-G	CPSF6 Knock-out
ZNF844	752.15	-0.26621	0.0865911	-3.07433	0.00210973	0.00918629	2	E-G	CPSF6 Knock-out
RP11-603J24.5	327.452	-0.376932	0.177883	-2.11898	0.0340919	0.0967444	2	E-G	CPSF6 Knock-out
RP11-235E17.2	183.623	1.07467	1.00797	1.06617	0.286346	0.483524	2	E-G	CPSF6 Knock-out
AP001187.11	3.29793	-0.303142	1.82267	-0.166318	0.867907	0.936769	2	E-G	CPSF6 Knock-out
AC104457.1	6.00175	0.589545	0.852096	0.691876	0.489015	0.681285	2	E-G	CPSF6 Knock-out
RP11-12J10.3	205.016	0.471463	0.280837	1.67878	0.0931954	0.21456	2	E-G	CPSF6 Knock-out
TRBV16	10.6886	0.0301727	0.922	0.0327253	0.973894	0.987852	2	E-G	CPSF6 Knock-out
L3MBTL1	1723.67	0.0576446	0.108443	0.531567	0.595026	0.763693	2	E-G	CPSF6 Knock-out
DDTP1	26.4345	-0.415947	0.498629	-0.83418	0.404179	0.607038	2	E-G	CPSF6 Knock-out
MAPT-AS1	4.40082	-0.733125	1.6365	-0.447983	0.654165	0.806331	2	E-G	CPSF6 Knock-out
MDM1	2103.85	0.284848	0.0592669	4.8062	1.5383e-06	1.3287e-05	2	E-G	CPSF6 Knock-out
MIR6859-3	79.2667	-0.0874116	0.192827	-0.453316	0.650321	0.803728	2	E-G	CPSF6 Knock-out
C6orf201	97.2197	-0.506962	0.256016	-1.9802	0.0476812	0.126866	2	E-G	CPSF6 Knock-out
LINC00520	23.3762	3.03983	0.885554	3.43269	0.000597628	0.00300113	2	E-G	CPSF6 Knock-out
AP3B1	10059.4	0.264279	0.0565834	4.6706	3.00319e-06	2.45241e-05	2	E-G	CPSF6 Knock-out
C11orf21	1484.33	-1.08085	0.0822522	-13.1407	1.92425e-39	3.23039e-37	2	E-G	CPSF6 Knock-out
NONOP2	419.706	0.808845	0.157655	5.13048	2.88997e-07	2.83836e-06	2	E-G	CPSF6 Knock-out
BAHCC1	57.8642	0.0120258	0.529611	0.0227068	0.981884	0.991637	2	E-G	CPSF6 Knock-out
FAM104A	5895.97	-0.364982	0.056016	-6.51567	7.23636e-11	1.1988e-09	2	E-G	CPSF6 Knock-out
SIGLEC31P	4.34152	3.64985	1.32153	2.76184	0.00574763	0.0218948	2	E-G	CPSF6 Knock-out
RP11-307C12.13	33.8464	-0.184508	0.455901	-0.404712	0.685689	0.828664	2	E-G	CPSF6 Knock-out
SLC25A39	6498.44	0.324698	0.0569416	5.70229	1.18207e-08	1.44322e-07	2	E-G	CPSF6 Knock-out
USF1	3010.75	-0.0244746	0.0484197	-0.505468	0.61323	0.776616	2	E-G	CPSF6 Knock-out
HDAC6	5258.23	-0.418085	0.033921	-12.3252	6.62456e-35	8.98048e-33	2	E-G	CPSF6 Knock-out
ZNF71	1381.59	-0.123211	0.0772943	-1.59405	0.110925	0.245813	2	E-G	CPSF6 Knock-out
RP11-345P4.9	355.501	0.485112	0.13589	3.56988	0.000357146	0.00189255	2	E-G	CPSF6 Knock-out
CALM1	45068.4	-0.223017	0.0643287	-3.46684	0.00052662	0.00268186	2	E-G	CPSF6 Knock-out
AP4B1-AS1	550.306	-0.193304	0.112032	-1.72545	0.084447	0.198891	2	E-G	CPSF6 Knock-out
RP11-67L14.1	26.3339	-0.729271	0.571542	-1.27597	0.201966	0.379457	2	E-G	CPSF6 Knock-out
SLC30A5	4582.78	0.206778	0.0709376	2.91493	0.00355766	0.0144626	2	E-G	CPSF6 Knock-out
ANKMY2	1482.12	-0.166101	0.0814112	-2.04027	0.0413235	0.112973	2	E-G	CPSF6 Knock-out
RP11-121P12.1	15.3192	2.37892	0.966082	2.46244	0.0137994	0.0462408	2	E-G	CPSF6 Knock-out
VIPR1	364.255	-1.39438	0.17046	-8.1801	2.83617e-16	8.60237e-15	2	E-G	CPSF6 Knock-out
SPATC1L	772.877	0.166801	0.10353	1.61113	0.107152	0.23979	2	E-G	CPSF6 Knock-out
MSANTD3-TMEFF1	169.64	-0.90956	1.50573	-0.604068	0.545799	0.727371	2	E-G	CPSF6 Knock-out
PTPRU	269	2.62938	0.169758	15.489	4.11549e-54	1.54331e-51	2	E-G	CPSF6 Knock-out
RN7SL182P	46.2624	-0.154283	0.369317	-0.417751	0.676129	0.821408	2	E-G	CPSF6 Knock-out
CTD-2545G14.6	185.94	-0.443302	0.318026	-1.39392	0.163342	0.326379	2	E-G	CPSF6 Knock-out
CTB-50L17.10	3675.78	0.0647569	0.0588282	1.10078	0.270993	0.465547	2	E-G	CPSF6 Knock-out
NPIPA7	662.708	-0.106958	0.0918577	-1.16439	0.244266	0.432475	2	E-G	CPSF6 Knock-out
DNTTIP1	1410.51	-0.105915	0.0738212	-1.43476	0.151357	0.308864	2	E-G	CPSF6 Knock-out
RIMS4	6.38965	3.94958	1.8003	2.19385	0.0282463	0.0831239	2	E-G	CPSF6 Knock-out
CORO2A	2289.78	-0.208609	0.0887	-2.35185	0.0186804	0.059477	2	E-G	CPSF6 Knock-out
SLC22A23	1307.82	-0.0704127	0.107405	-0.655582	0.512093	0.701389	2	E-G	CPSF6 Knock-out
NDUFB9P1	18.3551	-0.835273	0.546881	-1.52734	0.126677	0.270971	2	E-G	CPSF6 Knock-out
SLC30A8	3.94025	0.389268	1.74907	0.222557	0.82388	0.912571	2	E-G	CPSF6 Knock-out
YJEFN3	486.674	-0.690601	0.35132	-1.96573	0.0493295	0.130474	2	E-G	CPSF6 Knock-out
CTD-2553L13.9	323.73	-0.120522	0.178311	-0.675909	0.499098	0.68994	2	E-G	CPSF6 Knock-out
RP11-1086F11.1	106.117	-0.0833775	0.247041	-0.337504	0.735737	0.860585	2	E-G	CPSF6 Knock-out
EMILIN3	8.44676	0.328219	1.03299	0.317737	0.750684	0.869277	2	E-G	CPSF6 Knock-out
KRT17P2	18.2814	-0.466355	0.563229	-0.828001	0.40767	0.610506	2	E-G	CPSF6 Knock-out
RP11-816B4.1	5.10442	2.58759	1.34903	1.91811	0.0550969	0.14225	2	E-G	CPSF6 Knock-out
ABHD18	3955.87	-0.89547	0.0830343	-10.7843	4.08142e-27	3.04525e-25	2	E-G	CPSF6 Knock-out
PAX8	480.972	0.392247	0.169402	2.31548	0.0205868	0.0644453	2	E-G	CPSF6 Knock-out
RP4-584D14.7	23.5655	0.142016	0.53069	0.267607	0.789002	0.892658	2	E-G	CPSF6 Knock-out
FOXO3B	436.098	0.373757	0.117881	3.17064	0.00152103	0.00689262	2	E-G	CPSF6 Knock-out
CIDEB	1272.56	0.816803	0.133237	6.13043	8.76405e-10	1.24172e-08	2	E-G	CPSF6 Knock-out
TMEM240	21.2945	0.144448	0.675467	0.213849	0.830665	0.916561	2	E-G	CPSF6 Knock-out
GTF3A	15150.6	-0.158145	0.0642103	-2.46292	0.0137811	0.0461955	2	E-G	CPSF6 Knock-out
CTD-2002J20.1	41.7385	0.0231554	0.315411	0.0734134	0.941477	0.973108	2	E-G	CPSF6 Knock-out
RNU6-123P	5.24872	-0.937111	0.863935	-1.0847	0.278054	0.474015	2	E-G	CPSF6 Knock-out
RP5-966M1.6	484.717	-1.29638	0.178208	-7.27454	3.47615e-13	7.49617e-12	2	E-G	CPSF6 Knock-out
ETFB	3315.45	0.0522246	0.0584737	0.893129	0.371788	0.57547	2	E-G	CPSF6 Knock-out
CENPQ	1434.92	0.103782	0.1006	1.03163	0.302246	0.501275	2	E-G	CPSF6 Knock-out
ZNF700	4166.4	-0.338051	0.0578133	-5.84729	4.99653e-09	6.42363e-08	2	E-G	CPSF6 Knock-out
DUS1L	6763.5	0.271982	0.0526947	5.16146	2.45032e-07	2.43807e-06	2	E-G	CPSF6 Knock-out
SLC7A4	4.64227	1.33269	1.98067	0.672847	0.501045	0.691472	2	E-G	CPSF6 Knock-out
ANKRD16	590.883	0.0759946	0.0934522	0.813192	0.416108	0.618443	2	E-G	CPSF6 Knock-out
RNU6-1280P	8.7582	-0.313998	0.932106	-0.336869	0.736215	0.860788	2	E-G	CPSF6 Knock-out
ZNF519	2681.79	0.0816585	0.0809755	1.00843	0.313246	0.513773	2	E-G	CPSF6 Knock-out
CNFN	3.80081	2.3138	3.24359	0.713344	0.475633	0.670666	2	E-G	CPSF6 Knock-out
PHF24	15.8311	2.1491	1.01011	2.12759	0.0333714	0.0952267	2	E-G	CPSF6 Knock-out
RPS15AP12	37.4491	0.0352381	0.341722	0.103119	0.917868	0.961116	2	E-G	CPSF6 Knock-out
RP11-488C13.1	6.42382	0.67372	0.829245	0.812451	0.416533	0.618757	2	E-G	CPSF6 Knock-out
AC124074.1	6.95314	0.0666354	0.827969	0.0804805	0.935855	0.970194	2	E-G	CPSF6 Knock-out
ATG2A	4344.16	0.142574	0.0600903	2.37267	0.0176601	0.0567413	2	E-G	CPSF6 Knock-out
PAN2	4339.38	-0.293522	0.0570895	-5.14144	2.72643e-07	2.69148e-06	2	E-G	CPSF6 Knock-out
FAM106A	34.9761	-0.270126	0.38454	-0.702464	0.48239	0.676264	2	E-G	CPSF6 Knock-out
RP11-503P10.1	58.1601	-0.153275	0.352368	-0.434986	0.663573	0.812892	2	E-G	CPSF6 Knock-out
VIM-AS1	1262.51	0.0756254	0.0907911	0.832961	0.404867	0.607837	2	E-G	CPSF6 Knock-out
MIR6812	7.41218	0.400715	0.760097	0.52719	0.598062	0.765913	2	E-G	CPSF6 Knock-out
RP11-50C13.1	125.55	-0.873018	0.189545	-4.60587	4.1075e-06	3.26463e-05	2	E-G	CPSF6 Knock-out
DYNC1I2	5441.82	0.102979	0.0608522	1.69228	0.0905935	0.209875	2	E-G	CPSF6 Knock-out
CPT1C	105.979	-0.143115	0.314569	-0.454955	0.649142	0.803015	2	E-G	CPSF6 Knock-out
VAT1L	329.404	-1.29133	0.245198	-5.26649	1.39056e-07	1.43555e-06	2	E-G	CPSF6 Knock-out
RP11-144L1.8	11.9123	0.499103	0.523647	0.953129	0.340525	0.543211	2	E-G	CPSF6 Knock-out
RNA5SP247	14.8799	-0.245377	0.622842	-0.393963	0.693609	0.833884	2	E-G	CPSF6 Knock-out
PHKA1P1	46.6657	0.952538	0.287501	3.31316	0.000922475	0.00441293	2	E-G	CPSF6 Knock-out
AKR1C3	14.312	0.558566	1.27398	0.438441	0.661067	0.811354	2	E-G	CPSF6 Knock-out
RP11-264B17.3	3383.65	0.466139	0.376728	1.23734	0.215963	0.397091	2	E-G	CPSF6 Knock-out
CDNF	56.184	-0.482612	0.366697	-1.31611	0.188139	0.361108	2	E-G	CPSF6 Knock-out
AC073342.12	14.2593	-0.69544	0.752249	-0.924481	0.355236	0.558471	2	E-G	CPSF6 Knock-out
CYP17A1	7.29717	-0.494143	1.30161	-0.379642	0.704211	0.841172	2	E-G	CPSF6 Knock-out
MT1G	233.269	0.742355	0.196441	3.77901	0.000157452	0.000905122	2	E-G	CPSF6 Knock-out
PEA15	4846.81	0.355745	0.0615657	5.77831	7.54556e-09	9.41972e-08	2	E-G	CPSF6 Knock-out
HIST1H2AC	14671.5	0.0613787	0.064293	0.95467	0.339744	0.542385	2	E-G	CPSF6 Knock-out
MTND3P1	9.71793	2.82213	0.999627	2.82318	0.00475494	0.0185891	2	E-G	CPSF6 Knock-out
RP11-798G7.6	105.34	-0.653387	0.247938	-2.63529	0.00840662	0.0302783	2	E-G	CPSF6 Knock-out
ADGRA3	1840.14	0.313789	0.0724679	4.33004	1.49082e-05	0.000106002	2	E-G	CPSF6 Knock-out
SLC35F4	4.32119	1.5798	1.6797	0.940527	0.346948	0.549811	2	E-G	CPSF6 Knock-out
MIR5188	6.97708	-0.446823	0.675193	-0.66177	0.508118	0.697732	2	E-G	CPSF6 Knock-out
RNU6-181P	12.8873	-0.349009	0.682114	-0.511659	0.60889	0.773264	2	E-G	CPSF6 Knock-out
RP11-36C20.1	42.0179	0.0364495	0.316044	0.11533	0.908183	0.95634	2	E-G	CPSF6 Knock-out
KNG1	26.9268	0.341404	0.447078	0.763633	0.445086	0.644365	2	E-G	CPSF6 Knock-out
RP11-322D14.2	209.955	-0.468841	0.202456	-2.31577	0.020571	0.0644098	2	E-G	CPSF6 Knock-out
KCNE2	12.8626	-0.921332	1.12812	-0.8167	0.4141	0.616601	2	E-G	CPSF6 Knock-out
AC092641.2	29.2312	-0.333445	0.601372	-0.554473	0.579255	0.752237	2	E-G	CPSF6 Knock-out
TAX1BP1	11766.7	0.524963	0.0457633	11.4713	1.83953e-30	1.80668e-28	2	E-G	CPSF6 Knock-out
UPF1	15085.6	0.240398	0.0472184	5.0912	3.55805e-07	3.43034e-06	2	E-G	CPSF6 Knock-out
DDX42	12409.6	-0.0501168	0.0454169	-1.10348	0.269818	0.464163	2	E-G	CPSF6 Knock-out
DOLK	906.545	0.250857	0.0998975	2.51115	0.012034	0.0410978	2	E-G	CPSF6 Knock-out
PAIP1	4013.8	0.432142	0.0570803	7.57076	3.7104e-14	8.8911e-13	2	E-G	CPSF6 Knock-out
HECTD3	3524.08	-0.0900776	0.0541617	-1.66312	0.0962878	0.22031	2	E-G	CPSF6 Knock-out
CCDC90B	2779.54	-0.163821	0.0725111	-2.25926	0.0238672	0.0726048	2	E-G	CPSF6 Knock-out
RP11-677M14.5	8.64579	0.388952	0.811781	0.479134	0.631843	0.790831	2	E-G	CPSF6 Knock-out
PCP4L1	98.7668	-0.575435	0.209266	-2.74978	0.00596361	0.0225746	2	E-G	CPSF6 Knock-out
U1	358.3	0.435589	0.182823	2.38257	0.0171924	0.0555478	2	E-G	CPSF6 Knock-out
CTD-2527I21.5	15.0137	-0.647118	0.619417	-1.04472	0.296152	0.494443	2	E-G	CPSF6 Knock-out
STAG2	20392.7	0.180028	0.0459046	3.92178	8.78957e-05	0.000534651	2	E-G	CPSF6 Knock-out
SLC26A3	16.2001	1.06259	0.539596	1.96922	0.0489273	0.129636	2	E-G	CPSF6 Knock-out
CTD-2538G9.5	28.7264	-0.353368	0.441334	-0.800682	0.423316	0.624719	2	E-G	CPSF6 Knock-out
RP11-428K3.1	27.6506	-0.0134141	0.605387	-0.0221579	0.982322	0.991837	2	E-G	CPSF6 Knock-out
WDR24	2239.7	-0.0526231	0.0722737	-0.728108	0.466547	0.663076	2	E-G	CPSF6 Knock-out
TNPO2	10274.7	-0.0191082	0.0437046	-0.437213	0.661957	0.811802	2	E-G	CPSF6 Knock-out
SMTN	3855.95	-0.0661265	0.0591566	-1.11782	0.263643	0.45678	2	E-G	CPSF6 Knock-out
TIMM8A	895.985	0.187236	0.0957215	1.95605	0.0504595	0.132867	2	E-G	CPSF6 Knock-out
KCNN1	50.3316	0.876281	0.377835	2.31922	0.0203833	0.0638984	2	E-G	CPSF6 Knock-out
RP11-235C23.5	8.2536	1.50232	1.27114	1.18187	0.237259	0.424201	2	E-G	CPSF6 Knock-out
RASGRF1	11.4008	-0.847709	0.763808	-1.10985	0.267066	0.460692	2	E-G	CPSF6 Knock-out
RP11-326N17.1	10.9416	-2.03263	1.26355	-1.60867	0.107689	0.240712	2	E-G	CPSF6 Knock-out
SNORD19	28.6765	0.310744	0.393274	0.790147	0.429442	0.629928	2	E-G	CPSF6 Knock-out
FANCL	1146.36	0.169908	0.0686872	2.47364	0.0133744	0.0450256	2	E-G	CPSF6 Knock-out
GHRLOS	534.004	0.0166986	0.143807	0.116118	0.907559	0.956061	2	E-G	CPSF6 Knock-out
KIAA0895	127.679	1.64943	0.193182	8.53822	1.36299e-17	4.70209e-16	2	E-G	CPSF6 Knock-out
RP11-552C15.1	82.5673	0.909196	0.249751	3.64041	0.000272206	0.00148357	2	E-G	CPSF6 Knock-out
MIR4697	16.0191	-0.10643	0.388936	-0.273645	0.784357	0.889844	2	E-G	CPSF6 Knock-out
AC093668.2	10.1336	-1.04449	0.658534	-1.58608	0.112721	0.248674	2	E-G	CPSF6 Knock-out
TMEM223	1456.24	0.0511677	0.0773416	0.661581	0.50824	0.697866	2	E-G	CPSF6 Knock-out
DNM3	910.751	-0.0188108	0.111101	-0.169313	0.865551	0.935613	2	E-G	CPSF6 Knock-out
AC005757.7	61.844	-0.0868635	0.338666	-0.256487	0.797574	0.897644	2	E-G	CPSF6 Knock-out
KHDC1	481.647	0.00657652	0.130153	0.0505291	0.959701	0.981132	2	E-G	CPSF6 Knock-out
DLEU2L	313.586	0.0472233	0.179496	0.263089	0.792482	0.895088	2	E-G	CPSF6 Knock-out
NUDT18	1592.88	-0.382278	0.069569	-5.49495	3.90825e-08	4.39622e-07	2	E-G	CPSF6 Knock-out
RPS12P31	28.5503	0.809419	0.498799	1.62274	0.104646	0.235276	2	E-G	CPSF6 Knock-out
COL23A1	8.48138	-1.73826	1.13814	-1.52728	0.126692	0.270981	2	E-G	CPSF6 Knock-out
COL4A4	142.211	-0.119883	0.212307	-0.564667	0.5723	0.747103	2	E-G	CPSF6 Knock-out
C16orf13	3065.31	0.131234	0.0616489	2.12873	0.0332765	0.0950027	2	E-G	CPSF6 Knock-out
RP11-474G23.3	78.0971	-0.428093	0.251672	-1.701	0.0889433	0.206952	2	E-G	CPSF6 Knock-out
RING1	3474.42	0.358603	0.0662177	5.41552	6.11123e-08	6.68163e-07	2	E-G	CPSF6 Knock-out
BORCS8-MEF2B	382.512	-0.085846	0.208906	-0.410932	0.681123	0.825351	2	E-G	CPSF6 Knock-out
AL133243.1	349.102	-0.257707	0.208964	-1.23326	0.217478	0.398983	2	E-G	CPSF6 Knock-out
MIR5582	11.621	-1.72139	0.724061	-2.37741	0.0174346	0.0561658	2	E-G	CPSF6 Knock-out
UTP15	2216.83	-0.0149533	0.082629	-0.180969	0.856392	0.930792	2	E-G	CPSF6 Knock-out
RP5-1148A21.3	21.8282	-0.789686	0.386049	-2.04556	0.0407997	0.111805	2	E-G	CPSF6 Knock-out
UBE2Q1-AS1	62.6526	-0.0623197	0.291352	-0.213898	0.830627	0.916561	2	E-G	CPSF6 Knock-out
SCARNA13	1396.71	0.390811	0.152452	2.5635	0.0103624	0.0361021	2	E-G	CPSF6 Knock-out
TRIB3	3277.85	0.0572079	0.0634242	0.901989	0.367063	0.570578	2	E-G	CPSF6 Knock-out
GK5	2459.96	-0.395565	0.0712156	-5.55447	2.78456e-08	3.2065e-07	2	E-G	CPSF6 Knock-out
AC093642.3	531.129	-1.40164	0.192717	-7.27301	3.51554e-13	7.57547e-12	2	E-G	CPSF6 Knock-out
XBP1	14633.5	-0.121639	0.0909844	-1.33692	0.181247	0.351343	2	E-G	CPSF6 Knock-out
XAF1	1236.24	-1.12734	0.166788	-6.75913	1.38826e-11	2.52591e-10	2	E-G	CPSF6 Knock-out
RP11-245D16.4	41.4774	0.270585	0.316973	0.853653	0.393297	0.597205	2	E-G	CPSF6 Knock-out
DENND6A-AS1	39.3113	-0.0645678	0.423561	-0.15244	0.87884	0.941937	2	E-G	CPSF6 Knock-out
AL592183.1	613.244	0.124012	0.111069	1.11653	0.264195	0.457533	2	E-G	CPSF6 Knock-out
MIR3153	10.8616	0.462248	0.562784	0.821359	0.411442	0.614259	2	E-G	CPSF6 Knock-out
MIR491	7.42056	0.0770774	0.670512	0.114953	0.908482	0.956486	2	E-G	CPSF6 Knock-out
RP11-15E18.5	37.0401	-0.0552805	0.517185	-0.106887	0.914878	0.959889	2	E-G	CPSF6 Knock-out
RP11-661A12.5	91.4117	0.464902	0.26176	1.77606	0.0757229	0.182802	2	E-G	CPSF6 Knock-out
PCDHGB9P	5.24459	0.849879	1.10119	0.771781	0.440244	0.640147	2	E-G	CPSF6 Knock-out
RP4-671O14.7	148.029	-0.939826	0.274245	-3.42696	0.000610382	0.00305615	2	E-G	CPSF6 Knock-out
SEC24A	10513.4	0.53981	0.0623841	8.65299	5.01657e-18	1.81067e-16	2	E-G	CPSF6 Knock-out
POLH	6776.8	0.027333	0.0445343	0.613751	0.53938	0.722551	2	E-G	CPSF6 Knock-out
COLEC11	10.5664	-2.49713	1.37002	-1.82269	0.0683498	0.168727	2	E-G	CPSF6 Knock-out
HYAL2	544.426	0.216996	0.131304	1.65262	0.0984072	0.224271	2	E-G	CPSF6 Knock-out
RP11-84A14.4	35.9107	0.0580968	0.380724	0.152596	0.878717	0.941867	2	E-G	CPSF6 Knock-out
RPS10L	91.1717	0.43386	0.271783	1.59635	0.11041	0.24505	2	E-G	CPSF6 Knock-out
ETAA1	2608.79	-0.0693097	0.0534987	-1.29554	0.195134	0.370618	2	E-G	CPSF6 Knock-out
DMWD	2366.81	0.603053	0.0869137	6.93853	3.9621e-12	7.6017e-11	2	E-G	CPSF6 Knock-out
CTDNEP1	15011.3	0.153507	0.057363	2.67606	0.00744929	0.0273383	2	E-G	CPSF6 Knock-out
LRRC37A14P	3.8967	-0.124447	1.27968	-0.0972493	0.922528	0.963295	2	E-G	CPSF6 Knock-out
AC008746.5	116.955	-0.50461	0.233091	-2.16486	0.0303981	0.0881422	2	E-G	CPSF6 Knock-out
TMSB10	210664	0.234242	0.0662851	3.53385	0.000409548	0.0021373	2	E-G	CPSF6 Knock-out
NTRK2	142.439	0.613303	0.200432	3.05991	0.00221405	0.00958627	2	E-G	CPSF6 Knock-out
RP11-718B12.5	26.1235	-0.780502	0.531011	-1.46984	0.141604	0.294203	2	E-G	CPSF6 Knock-out
C12orf74	7.26221	0.218325	1.23258	0.177129	0.859407	0.932446	2	E-G	CPSF6 Knock-out
SMC5	11225.6	-0.412721	0.0525145	-7.85919	3.86624e-15	1.02514e-13	2	E-G	CPSF6 Knock-out
TM4SF19-AS1	77.1706	-0.295479	0.24381	-1.21193	0.225541	0.409643	2	E-G	CPSF6 Knock-out
BBX	8693.2	-0.0956998	0.0556135	-1.7208	0.0852868	0.200249	2	E-G	CPSF6 Knock-out
ICT1	1379.9	-0.205457	0.100164	-2.0512	0.0402475	0.110554	2	E-G	CPSF6 Knock-out
CEP70	1720.79	-0.244574	0.0915995	-2.67003	0.00758438	0.0277882	2	E-G	CPSF6 Knock-out
KRTAP5-8	6.48444	-2.06942	1.13297	-1.82655	0.0677681	0.167463	2	E-G	CPSF6 Knock-out
RP11-385F5.5	124.417	-0.119248	0.227371	-0.524463	0.599956	0.767245	2	E-G	CPSF6 Knock-out
ATP13A2	4770.1	0.168552	0.0699018	2.41127	0.0158973	0.0520152	2	E-G	CPSF6 Knock-out
HIRA	6842.04	-0.0253885	0.0595881	-0.426067	0.670059	0.817163	2	E-G	CPSF6 Knock-out
AC008073.7	6.51712	-0.882304	0.841843	-1.04806	0.29461	0.492717	2	E-G	CPSF6 Knock-out
RAD51L3-RFFL	6.76222	0.231935	0.799542	0.290085	0.771751	0.882093	2	E-G	CPSF6 Knock-out
RP11-307C12.11	48.8491	0.411089	0.496843	0.827402	0.408009	0.610842	2	E-G	CPSF6 Knock-out
NOL3	1619.09	0.661526	0.115377	5.73361	9.83175e-09	1.20856e-07	2	E-G	CPSF6 Knock-out
CTB-12A17.2	192.657	0.2402	0.21419	1.12143	0.262103	0.455257	2	E-G	CPSF6 Knock-out
H3F3B	26618.5	0.0462222	0.0619794	0.745768	0.455807	0.653357	2	E-G	CPSF6 Knock-out
GINS4	5174.28	0.153073	0.0537853	2.846	0.00442727	0.0174644	2	E-G	CPSF6 Knock-out
SNHG21	231.688	0.362524	0.189891	1.90912	0.0562466	0.144598	2	E-G	CPSF6 Knock-out
KIAA1024	240.784	-0.134521	0.158104	-0.85084	0.394858	0.598788	2	E-G	CPSF6 Knock-out
TRAV1-1	187.063	0.270452	0.194423	1.39105	0.164211	0.327616	2	E-G	CPSF6 Knock-out
AC007000.10	49.904	-0.0771247	0.368239	-0.209442	0.834103	0.918844	2	E-G	CPSF6 Knock-out
ZNF207	39075.5	-0.0761939	0.0412181	-1.84855	0.0645222	0.161236	2	E-G	CPSF6 Knock-out
C10orf88	1169.55	0.0582046	0.0838299	0.694318	0.487483	0.68007	2	E-G	CPSF6 Knock-out
RP11-248G5.9	19.2291	-1.09921	0.828032	-1.3275	0.184344	0.355834	2	E-G	CPSF6 Knock-out
RP11-347C12.11	93.6128	0.132868	0.336336	0.395046	0.692809	0.833466	2	E-G	CPSF6 Knock-out
LINC01296	21.1674	0.791111	0.429972	1.83991	0.0657813	0.163561	2	E-G	CPSF6 Knock-out
RP11-53B2.4	70.1075	-0.146642	0.351961	-0.416641	0.676941	0.822152	2	E-G	CPSF6 Knock-out
CLOCK	3156.59	0.0974361	0.0680796	1.43121	0.15237	0.310106	2	E-G	CPSF6 Knock-out
FBXL5	4925.9	0.103482	0.0574337	1.80176	0.0715836	0.174957	2	E-G	CPSF6 Knock-out
RP11-433J8.1	55.4942	-0.67121	0.428974	-1.56469	0.117656	0.25679	2	E-G	CPSF6 Knock-out
RP1-228P16.7	35.0402	-0.0175758	0.328106	-0.0535675	0.95728	0.980261	2	E-G	CPSF6 Knock-out
RP11-582E3.4	23.0357	0.155439	0.576987	0.269398	0.787624	0.891973	2	E-G	CPSF6 Knock-out
PIPOX	94.2101	0.0517003	0.243527	0.212298	0.831875	0.917264	2	E-G	CPSF6 Knock-out
MATK	1382.44	0.0968496	0.120951	0.800733	0.423286	0.624719	2	E-G	CPSF6 Knock-out
RNU6-479P	5.87331	0.421316	0.806978	0.522091	0.601607	0.768558	2	E-G	CPSF6 Knock-out
IZUMO1	6.99673	6.41707	1.43841	4.46124	8.14866e-06	6.11308e-05	2	E-G	CPSF6 Knock-out
AREG	47.768	1.60474	0.510846	3.14133	0.00168183	0.00752678	2	E-G	CPSF6 Knock-out
RP11-705C15.4	21.2013	0.295401	0.613478	0.481518	0.630148	0.789599	2	E-G	CPSF6 Knock-out
ANTXR1	4.22883	2.27865	1.73563	1.31286	0.18923	0.362624	2	E-G	CPSF6 Knock-out
COMMD9	1607.06	0.032407	0.0700331	0.462738	0.643552	0.799804	2	E-G	CPSF6 Knock-out
FGD4	72.4069	-0.683809	0.32207	-2.12317	0.0337397	0.0959823	2	E-G	CPSF6 Knock-out
RP1-292L20.3	28.1344	1.16078	0.444454	2.6117	0.0090093	0.0320808	2	E-G	CPSF6 Knock-out
TLR2	207.025	0.4899	0.241064	2.03224	0.0421296	0.114688	2	E-G	CPSF6 Knock-out
SAP25	98.511	-0.839906	0.274677	-3.0578	0.0022297	0.00964389	2	E-G	CPSF6 Knock-out
FAM89B	3454.54	0.641532	0.0989495	6.48343	8.96575e-11	1.46844e-09	2	E-G	CPSF6 Knock-out
HIST2H2BE	25420.5	0.0257018	0.0659313	0.389826	0.696665	0.835699	2	E-G	CPSF6 Knock-out
ABHD6	546.011	0.113771	0.110656	1.02815	0.303878	0.503239	2	E-G	CPSF6 Knock-out
RP11-77G23.5	19.8177	-0.326585	0.709231	-0.460477	0.645174	0.800679	2	E-G	CPSF6 Knock-out
NPM1P40	14.1417	0.327246	0.49893	0.655894	0.511892	0.701181	2	E-G	CPSF6 Knock-out
RP11-206L10.8	170.039	0.0601677	0.183155	0.328507	0.742528	0.864362	2	E-G	CPSF6 Knock-out
PSMC6	5651.6	0.37751	0.0507716	7.43545	1.04215e-13	2.38259e-12	2	E-G	CPSF6 Knock-out
VKORC1	3194.41	0.296539	0.0763135	3.8858	0.000101992	0.000612399	2	E-G	CPSF6 Knock-out
RP11-126O1.4	53.9437	0.309384	0.297843	1.03875	0.298922	0.4976	2	E-G	CPSF6 Knock-out
PRPSAP2	3530.96	-0.103805	0.0521694	-1.98978	0.0466155	0.124563	2	E-G	CPSF6 Knock-out
RP11-426J5.3	28.7742	0.0446154	0.443821	0.100526	0.919927	0.96211	2	E-G	CPSF6 Knock-out
ITGB5	31.2247	0.871708	0.561624	1.55212	0.120634	0.261489	2	E-G	CPSF6 Knock-out
ARMC9	130.514	0.815699	0.277998	2.93419	0.00334423	0.0136893	2	E-G	CPSF6 Knock-out
PLLP	1135.07	-0.0331873	0.268253	-0.123717	0.90154	0.953226	2	E-G	CPSF6 Knock-out
THSD1	69.2984	1.53264	0.302195	5.07169	3.94308e-07	3.76634e-06	2	E-G	CPSF6 Knock-out
TNIP1	24437.4	0.47687	0.056856	8.38732	4.97362e-17	1.60462e-15	2	E-G	CPSF6 Knock-out
RP11-596C23.6	173.096	0.505256	0.196302	2.57387	0.0100568	0.0351923	2	E-G	CPSF6 Knock-out
ATF7IP	20303.1	-0.345594	0.0405519	-8.52228	1.56447e-17	5.37786e-16	2	E-G	CPSF6 Knock-out
HNRNPA3P11	40.0294	-0.0660847	0.422444	-0.156434	0.875691	0.940159	2	E-G	CPSF6 Knock-out
CTD-2619J13.13	6.30023	-0.375078	1.30693	-0.286991	0.774119	0.883598	2	E-G	CPSF6 Knock-out
PRICKLE1	71.4205	0.943856	0.288996	3.26599	0.00109083	0.005123	2	E-G	CPSF6 Knock-out
SLC38A4	74.3544	0.780891	0.369442	2.11371	0.0345403	0.0977316	2	E-G	CPSF6 Knock-out
RP11-128N14.4	26.0492	0.572919	0.46979	1.21952	0.222647	0.405841	2	E-G	CPSF6 Knock-out
RP11-175O19.4	1071.86	-0.0604451	0.0821196	-0.736062	0.461693	0.658828	2	E-G	CPSF6 Knock-out
ARID3A	5735.01	0.0390045	0.0645614	0.604145	0.545747	0.727371	2	E-G	CPSF6 Knock-out
AC114730.11	46.5879	-0.822949	0.381954	-2.15458	0.0311949	0.0900032	2	E-G	CPSF6 Knock-out
ADGRL2	15.9997	0.229333	0.898839	0.255144	0.798612	0.898217	2	E-G	CPSF6 Knock-out
SLC25A40	6303.08	-0.337462	0.0639578	-5.27633	1.31797e-07	1.36746e-06	2	E-G	CPSF6 Knock-out
PMVK	1970.02	0.173707	0.0938461	1.85098	0.0641731	0.160558	2	E-G	CPSF6 Knock-out
ZNF736	6148.99	-0.278792	0.0374073	-7.45289	9.13194e-14	2.10107e-12	2	E-G	CPSF6 Knock-out
TMEM150C	134.305	0.976811	0.261532	3.73496	0.000187746	0.00106048	2	E-G	CPSF6 Knock-out
CAP1P2	8.27559	0.254392	0.601746	0.422756	0.672473	0.818792	2	E-G	CPSF6 Knock-out
RP11-552F3.9	368.914	-0.29605	0.165922	-1.78427	0.0743797	0.180208	2	E-G	CPSF6 Knock-out
ADGRV1	9.12796	3.84789	1.22896	3.13101	0.00174207	0.00776751	2	E-G	CPSF6 Knock-out
RNF219-AS1	27.3492	-0.490566	0.610564	-0.803464	0.421707	0.62331	2	E-G	CPSF6 Knock-out
TTC21B	3858.21	0.392741	0.0551558	7.12056	1.07489e-12	2.19036e-11	2	E-G	CPSF6 Knock-out
RNU1-3	316.976	0.453859	0.184995	2.45336	0.0141529	0.0472828	2	E-G	CPSF6 Knock-out
PROSER1	9396.58	0.0639255	0.0575763	1.11028	0.266881	0.460546	2	E-G	CPSF6 Knock-out
TUSC5	66.6221	-0.029715	0.297293	-0.0999519	0.920383	0.962222	2	E-G	CPSF6 Knock-out
AC009120.6	838.15	-0.507663	0.143027	-3.54943	0.000386072	0.00202836	2	E-G	CPSF6 Knock-out
LOXHD1	6.33409	-0.246199	1.77706	-0.138543	0.889811	0.946986	2	E-G	CPSF6 Knock-out
PHACTR2	11690.6	-0.286401	0.0497433	-5.75759	8.53256e-09	1.05605e-07	2	E-G	CPSF6 Knock-out
FAM91A3P	12.3998	0.590178	0.539506	1.09392	0.273989	0.469353	2	E-G	CPSF6 Knock-out
MRPS10	3187.65	-0.0614462	0.0793463	-0.774406	0.438691	0.638808	2	E-G	CPSF6 Knock-out
MLLT4	3819.28	0.433825	0.0607337	7.14307	9.12665e-13	1.87434e-11	2	E-G	CPSF6 Knock-out
ZC3H11B	56.8976	0.00695335	0.25481	0.0272884	0.97823	0.990119	2	E-G	CPSF6 Knock-out
WEE2-AS1	79.2553	-0.667462	0.325999	-2.04744	0.0406151	0.111405	2	E-G	CPSF6 Knock-out
APOD	543.062	1.74336	0.161119	10.8203	2.75819e-27	2.10139e-25	2	E-G	CPSF6 Knock-out
ARV1	1204.52	-0.190952	0.0817977	-2.33445	0.0195724	0.0617924	2	E-G	CPSF6 Knock-out
TSSK5P	72.0938	-0.914713	0.312899	-2.92335	0.00346285	0.0141147	2	E-G	CPSF6 Knock-out
ACO1	3146.05	0.426832	0.0548108	7.78738	6.84157e-15	1.76858e-13	2	E-G	CPSF6 Knock-out
EMC3-AS1	2199.24	0.50214	0.105085	4.77843	1.7667e-06	1.51241e-05	2	E-G	CPSF6 Knock-out
RP11-21B23.1	5.26209	-0.0251494	1.44845	-0.017363	0.986147	0.993582	2	E-G	CPSF6 Knock-out
ZFP57	383.352	-0.0266703	0.155239	-0.171801	0.863594	0.934503	2	E-G	CPSF6 Knock-out
SENP1	7257.76	0.0670447	0.0623818	1.07475	0.282488	0.478967	2	E-G	CPSF6 Knock-out
RP11-176H8.3	6.93583	1.18487	1.15616	1.02484	0.305438	0.505041	2	E-G	CPSF6 Knock-out
ESPNP	8.01582	-1.0152	1.1135	-0.911717	0.361918	0.565619	2	E-G	CPSF6 Knock-out
FOXC1	15.4423	0.795926	0.749004	1.06265	0.287942	0.485168	2	E-G	CPSF6 Knock-out
NUBPL	846.227	-0.0266993	0.110172	-0.242342	0.808515	0.904003	2	E-G	CPSF6 Knock-out
KTN1	18207.8	0.183291	0.0424406	4.31876	1.56909e-05	0.000111157	2	E-G	CPSF6 Knock-out
TMEM200A	426.606	0.516089	0.171327	3.0123	0.00259275	0.0109725	2	E-G	CPSF6 Knock-out
ITGAX	8260.54	0.640096	0.0746293	8.577	9.73773e-18	3.41234e-16	2	E-G	CPSF6 Knock-out
KMT2E	25889.5	0.180391	0.038169	4.72611	2.28858e-06	1.91433e-05	2	E-G	CPSF6 Knock-out
FRS3	454.601	-0.0706905	0.10719	-0.659485	0.509584	0.699213	2	E-G	CPSF6 Knock-out
MTND3P5	6.17071	-1.73789	1.31232	-1.32429	0.185408	0.357339	2	E-G	CPSF6 Knock-out
AC005943.2	37.1161	-1.24344	0.678735	-1.83199	0.0669528	0.165888	2	E-G	CPSF6 Knock-out
ACSBG1	246.494	0.0878571	0.411432	0.21354	0.830906	0.916686	2	E-G	CPSF6 Knock-out
TMEM121	719.066	0.454478	0.111816	4.06453	4.81299e-05	0.000308902	2	E-G	CPSF6 Knock-out
EEF1A1P4	244.519	-0.170656	0.204147	-0.835947	0.403185	0.606352	2	E-G	CPSF6 Knock-out
RPL23AP92	22.9939	-0.64871	0.416847	-1.55623	0.119653	0.259961	2	E-G	CPSF6 Knock-out
NOL4L	2995.48	-0.321119	0.0641407	-5.00649	5.54319e-07	5.18328e-06	2	E-G	CPSF6 Knock-out
CDC7	5111.75	-0.324356	0.0482239	-6.72603	1.74353e-11	3.13087e-10	2	E-G	CPSF6 Knock-out
BMPR1B	4.00027	0.0656019	3.60836	0.0181806	0.985495	0.993304	2	E-G	CPSF6 Knock-out
IRF2	6693.73	0.111775	0.0694438	1.60958	0.10749	0.240322	2	E-G	CPSF6 Knock-out
PEX26	12829.2	-0.0199564	0.0493897	-0.40406	0.686168	0.829022	2	E-G	CPSF6 Knock-out
RP11-717A5.1	11.225	0.627793	0.709342	0.885036	0.376137	0.579808	2	E-G	CPSF6 Knock-out
SENP7	5743.97	-0.225685	0.059222	-3.81084	0.000138498	0.000806268	2	E-G	CPSF6 Knock-out
ATAD2B	3805.17	-0.213811	0.0598233	-3.57404	0.000351514	0.00186546	2	E-G	CPSF6 Knock-out
RP11-266I3.1	6.4578	-0.483898	1.20247	-0.402419	0.687375	0.829855	2	E-G	CPSF6 Knock-out
CDKL1	120.866	-0.237879	0.213108	-1.11624	0.26432	0.457623	2	E-G	CPSF6 Knock-out
WAC-AS1	1686.9	-0.207229	0.0688908	-3.00807	0.00262911	0.0111053	2	E-G	CPSF6 Knock-out
REV3L-IT1	20.1192	-0.307186	0.476395	-0.644814	0.519048	0.707225	2	E-G	CPSF6 Knock-out
AC006014.7	222.345	0.0104969	0.210846	0.0497847	0.960294	0.981432	2	E-G	CPSF6 Knock-out
UQCRC2	14109.7	0.0982984	0.0527533	1.86336	0.0624115	0.157062	2	E-G	CPSF6 Knock-out
AXL	268.566	0.830688	0.261138	3.18103	0.00146751	0.00668042	2	E-G	CPSF6 Knock-out
PABPC1P1	126.595	-0.291002	0.244537	-1.19002	0.23404	0.419954	2	E-G	CPSF6 Knock-out
RPL21P121	74.6723	0.529055	0.264495	2.00025	0.0454736	0.122076	2	E-G	CPSF6 Knock-out
AC004893.10	124.561	0.000281243	0.292465	0.000961629	0.999233	0.999406	2	E-G	CPSF6 Knock-out
YTHDC1	8890.17	0.0433413	0.0500183	0.866509	0.386211	0.590045	2	E-G	CPSF6 Knock-out
ATP2B4	37735.9	0.135961	0.0374416	3.6313	0.000282002	0.00153031	2	E-G	CPSF6 Knock-out
CTD-2313J17.6	88.4688	0.391511	0.247244	1.5835	0.113308	0.249621	2	E-G	CPSF6 Knock-out
WDR49	36.0447	3.22924	0.805984	4.00658	6.1605e-05	0.000386874	2	E-G	CPSF6 Knock-out
TOMM6	4213.07	0.203765	0.0921187	2.21198	0.0269678	0.0801128	2	E-G	CPSF6 Knock-out
IGFL4	4.81675	0.639994	1.82248	0.351167	0.725463	0.854034	2	E-G	CPSF6 Knock-out
HTR6	38.5083	1.3445	0.513168	2.62	0.00879304	0.0314154	2	E-G	CPSF6 Knock-out
AC017104.2	42.1634	0.795495	0.359314	2.21393	0.0268337	0.0798127	2	E-G	CPSF6 Knock-out
CORO7	11561.9	-0.0735316	0.0717684	-1.02457	0.305567	0.505141	2	E-G	CPSF6 Knock-out
RN7SL20P	31.2272	-0.385376	0.494999	-0.778538	0.436252	0.636425	2	E-G	CPSF6 Knock-out
RP11-82O19.1	95.0821	-0.281712	0.290496	-0.969759	0.332167	0.534692	2	E-G	CPSF6 Knock-out
OXR1	4758.1	0.0796688	0.0706348	1.1279	0.259364	0.451996	2	E-G	CPSF6 Knock-out
GFPT1	10772.1	-0.0356874	0.0618645	-0.576864	0.564031	0.740668	2	E-G	CPSF6 Knock-out
LINC00536	9.24824	1.042	1.25118	0.832815	0.404949	0.607897	2	E-G	CPSF6 Knock-out
AD000684.2	187.245	-0.257235	0.194675	-1.32135	0.186384	0.358586	2	E-G	CPSF6 Knock-out
RP11-63K6.1	50.9132	0.718184	0.368152	1.95078	0.0510829	0.134196	2	E-G	CPSF6 Knock-out
C11orf72	6.74733	0.559856	0.722575	0.774807	0.438454	0.63867	2	E-G	CPSF6 Knock-out
RPL39P34	10.7927	-0.481523	0.777399	-0.619402	0.535651	0.719961	2	E-G	CPSF6 Knock-out
RP11-809N8.4	35.6498	-0.789606	0.493899	-1.59872	0.109883	0.244268	2	E-G	CPSF6 Knock-out
CHKA	1751.83	0.224764	0.0811526	2.76964	0.00561184	0.0214739	2	E-G	CPSF6 Knock-out
RP4-566L20.1	77.1258	0.535823	0.37998	1.41014	0.1585	0.319266	2	E-G	CPSF6 Knock-out
WTIP	151.432	0.362742	0.237552	1.527	0.126761	0.271067	2	E-G	CPSF6 Knock-out
PHC1	1442.54	-0.0785529	0.102216	-0.768502	0.442189	0.642145	2	E-G	CPSF6 Knock-out
CISD2	3927.05	-0.241633	0.0873323	-2.76682	0.00566057	0.0216231	2	E-G	CPSF6 Knock-out
ZFP82	1216.57	-0.0687235	0.0800179	-0.858852	0.390422	0.594215	2	E-G	CPSF6 Knock-out
RC3H1	12941.6	-0.0160715	0.0418285	-0.384223	0.700813	0.838554	2	E-G	CPSF6 Knock-out
RP11-438D8.2	23.8046	-0.089599	0.401389	-0.223223	0.823362	0.912197	2	E-G	CPSF6 Knock-out
IGHV7-34-1	9.2915	1.49461	0.794023	1.88232	0.059792	0.151726	2	E-G	CPSF6 Knock-out
CTB-96E2.3	12.2664	4.23716	2.54671	1.66378	0.0961566	0.220097	2	E-G	CPSF6 Knock-out
VIMP	1341.24	0.0434091	0.0846579	0.512759	0.60812	0.772625	2	E-G	CPSF6 Knock-out
RP11-313A24.1	5.46749	-0.0773016	1.40654	-0.0549588	0.956171	0.979905	2	E-G	CPSF6 Knock-out
IGFBPL1	6.62483	1.54091	2.4188	0.637055	0.524089	0.710974	2	E-G	CPSF6 Knock-out
RP1-198K11.5	72.2287	0.385762	0.334294	1.15396	0.248516	0.438089	2	E-G	CPSF6 Knock-out
EMP1	1194.4	1.13229	0.0996634	11.3611	6.53137e-30	6.18339e-28	2	E-G	CPSF6 Knock-out
RPL21P8	108.945	-0.101	0.415795	-0.242909	0.808076	0.903862	2	E-G	CPSF6 Knock-out
ZNF799	890.091	0.0276174	0.102975	0.268196	0.788548	0.892475	2	E-G	CPSF6 Knock-out
TMEM249	44.107	0.174642	0.427992	0.40805	0.683237	0.826956	2	E-G	CPSF6 Knock-out
MTA2	26114	0.0374728	0.0473027	0.792192	0.428249	0.629137	2	E-G	CPSF6 Knock-out
CSNK1A1P1	20.8686	-0.140056	0.529973	-0.264269	0.791572	0.89427	2	E-G	CPSF6 Knock-out
METAP1D	378.29	-0.204638	0.103992	-1.96781	0.0490896	0.129931	2	E-G	CPSF6 Knock-out
SRSF6	19049.1	-0.195488	0.0463903	-4.21398	2.50906e-05	0.00017079	2	E-G	CPSF6 Knock-out
RP11-65L3.3	266.11	0.140318	0.217248	0.645888	0.518352	0.706751	2	E-G	CPSF6 Knock-out
ZNF887P	167.478	-0.0415407	0.178918	-0.232177	0.8164	0.90837	2	E-G	CPSF6 Knock-out
PRKX-AS1	93.3993	-0.391836	0.245195	-1.59806	0.11003	0.244488	2	E-G	CPSF6 Knock-out
C11orf31	5276.28	0.158653	0.0607137	2.61314	0.00897141	0.0319656	2	E-G	CPSF6 Knock-out
HIPK1	18387.3	0.0590615	0.0482618	1.22377	0.221037	0.403834	2	E-G	CPSF6 Knock-out
BORA	2482.45	-0.157466	0.0642409	-2.45118	0.0142388	0.0475092	2	E-G	CPSF6 Knock-out
PLCB2-AS1	57.3862	-0.240733	0.340918	-0.706133	0.480105	0.674436	2	E-G	CPSF6 Knock-out
RP11-567L7.3	55.6572	-0.3428	0.368309	-0.930741	0.351988	0.555057	2	E-G	CPSF6 Knock-out
RNU6-387P	29.611	0.453479	0.333251	1.36077	0.173585	0.340949	2	E-G	CPSF6 Knock-out
FAM78B	70.4834	0.402327	0.249329	1.61364	0.106606	0.238864	2	E-G	CPSF6 Knock-out
CYP27A1	11.2135	0.903591	1.03474	0.873252	0.382526	0.58612	2	E-G	CPSF6 Knock-out
FANK1	51.7204	-0.784347	0.377976	-2.07512	0.0379751	0.105588	2	E-G	CPSF6 Knock-out
BEX1	10.3436	1.02589	1.265	0.810978	0.417379	0.619557	2	E-G	CPSF6 Knock-out
HENMT1	1424.54	-0.0560561	0.0707708	-0.792079	0.428315	0.629182	2	E-G	CPSF6 Knock-out
RP11-483M24.2	19.536	0.162449	0.828435	0.196092	0.844538	0.924309	2	E-G	CPSF6 Knock-out
ZNF75D	2690.11	0.0286113	0.069742	0.410245	0.681626	0.825724	2	E-G	CPSF6 Knock-out
TRAV20	193.384	-0.0407351	0.204391	-0.1993	0.842028	0.923207	2	E-G	CPSF6 Knock-out
AC007292.4	19.6772	0.199986	0.518935	0.385378	0.699957	0.838155	2	E-G	CPSF6 Knock-out
SUMO2	19231	0.0465114	0.0640809	0.725823	0.467947	0.663979	2	E-G	CPSF6 Knock-out
VN1R42P	45.7326	-0.32368	0.331582	-0.976169	0.328981	0.531193	2	E-G	CPSF6 Knock-out
BMP10	3.42714	1.56983	2.10259	0.746616	0.455295	0.653022	2	E-G	CPSF6 Knock-out
GOLGA1	2769.82	-0.307263	0.0859385	-3.57538	0.000349714	0.00185659	2	E-G	CPSF6 Knock-out
ZNF367	6648.75	-0.00436787	0.0536585	-0.0814012	0.935123	0.969783	2	E-G	CPSF6 Knock-out
RP13-46H24.1	49.4202	0.133595	0.291063	0.458992	0.64624	0.801402	2	E-G	CPSF6 Knock-out
SLX1A	2360.6	-0.286516	0.111804	-2.56268	0.0103869	0.0361832	2	E-G	CPSF6 Knock-out
SERF1A	573.843	-0.00475875	0.0773085	-0.0615553	0.950917	0.977311	2	E-G	CPSF6 Knock-out
THYN1	3584.58	-0.00285241	0.0756455	-0.0377076	0.969921	0.986236	2	E-G	CPSF6 Knock-out
PUS7L	7729.72	-0.479722	0.0587649	-8.16341	3.25697e-16	9.776e-15	2	E-G	CPSF6 Knock-out
BRCC3	4442.36	0.177021	0.0564346	3.13675	0.00170833	0.00763	2	E-G	CPSF6 Knock-out
RNU6-1316P	9.75817	0.834045	0.769604	1.08373	0.278484	0.474436	2	E-G	CPSF6 Knock-out
AL049794.1	36.1174	-0.22088	0.45494	-0.485515	0.627311	0.787617	2	E-G	CPSF6 Knock-out
MIR589	16.6241	-0.969032	0.663287	-1.46095	0.144028	0.29776	2	E-G	CPSF6 Knock-out
RP11-68I3.10	25.3116	0.231329	0.379894	0.608932	0.54257	0.724908	2	E-G	CPSF6 Knock-out
HTRA3	8.69575	3.43484	1.30333	2.63544	0.00840283	0.0302684	2	E-G	CPSF6 Knock-out
RP11-693M3.1	31.4983	1.64703	0.575933	2.85976	0.00423964	0.0168344	2	E-G	CPSF6 Knock-out
AC068946.1	6.23659	0.271635	0.862239	0.315034	0.752736	0.870384	2	E-G	CPSF6 Knock-out
ZMYM4	8595.95	0.306012	0.0496924	6.15813	7.36083e-10	1.05533e-08	2	E-G	CPSF6 Knock-out
CCDC150	810.003	0.138636	0.13938	0.994657	0.319903	0.521051	2	E-G	CPSF6 Knock-out
PKN1	22623.6	0.0917868	0.0598108	1.53462	0.124877	0.268291	2	E-G	CPSF6 Knock-out
RP11-849I19.2	34.4934	-0.380496	0.502894	-0.756613	0.449282	0.64754	2	E-G	CPSF6 Knock-out
IFT81	367.872	-0.119401	0.151651	-0.787342	0.431082	0.631692	2	E-G	CPSF6 Knock-out
TATDN2P2	1201.68	-0.0747492	0.117244	-0.63755	0.523766	0.710703	2	E-G	CPSF6 Knock-out
ZGPAT	2858.99	-0.193072	0.0789058	-2.44687	0.0144103	0.0479541	2	E-G	CPSF6 Knock-out
PTPRN2	484.544	-0.585072	0.145753	-4.01414	5.96622e-05	0.000376063	2	E-G	CPSF6 Knock-out
SOSTDC1	5.52803	-3.72559	1.71643	-2.17055	0.0299651	0.0871274	2	E-G	CPSF6 Knock-out
PRSS1	7.95085	0.398798	1.24368	0.320659	0.748469	0.868073	2	E-G	CPSF6 Knock-out
HCLS1	25501.2	0.0221441	0.0357919	0.618691	0.53612	0.720256	2	E-G	CPSF6 Knock-out
PRSS2	8.7428	-0.318821	0.744003	-0.428521	0.668272	0.815976	2	E-G	CPSF6 Knock-out
EARS2	2031.27	0.659891	0.0615335	10.7241	7.84587e-27	5.67793e-25	2	E-G	CPSF6 Knock-out
RP11-6O2.3	8.2376	-2.05541	1.51717	-1.35477	0.175492	0.343524	2	E-G	CPSF6 Knock-out
RP11-463D19.1	102.678	-0.222889	0.29671	-0.7512	0.452532	0.65074	2	E-G	CPSF6 Knock-out
RPL4P1	87.854	0.193601	0.223137	0.867632	0.385596	0.58926	2	E-G	CPSF6 Knock-out
GCLC	3318.61	0.162897	0.067292	2.42074	0.0154889	0.0509212	2	E-G	CPSF6 Knock-out
RPL24P4	44.0383	-0.0489832	0.339717	-0.144188	0.885352	0.94477	2	E-G	CPSF6 Knock-out
TMC6	15760.2	-0.165439	0.0600883	-2.75327	0.0059004	0.0223617	2	E-G	CPSF6 Knock-out
AC090804.1	108.901	-0.0180825	0.256567	-0.0704784	0.943813	0.973992	2	E-G	CPSF6 Knock-out
AC002550.5	22.2006	0.0695378	0.468128	0.148544	0.881913	0.943437	2	E-G	CPSF6 Knock-out
CTD-2619J13.19	73.927	0.792164	0.263381	3.00768	0.00263251	0.011118	2	E-G	CPSF6 Knock-out
CMB9-55F22.1	705.345	-0.00826139	0.11907	-0.0693827	0.944685	0.974224	2	E-G	CPSF6 Knock-out
YARS2	1838.6	0.241963	0.0760453	3.18183	0.00146348	0.00666321	2	E-G	CPSF6 Knock-out
OGFOD2	1229.18	-0.217649	0.110891	-1.96272	0.049679	0.131207	2	E-G	CPSF6 Knock-out
CTD-3035K23.3	14.5465	-0.149473	0.676357	-0.220998	0.825094	0.913274	2	E-G	CPSF6 Knock-out
GOT2P3	12.9594	-0.0892449	0.818679	-0.109011	0.913194	0.959122	2	E-G	CPSF6 Knock-out
RP11-661C3.2	8.75402	0.0926838	0.831181	0.111509	0.911213	0.95801	2	E-G	CPSF6 Knock-out
LINC00239	82.9558	-0.328475	0.266486	-1.23262	0.217718	0.399227	2	E-G	CPSF6 Knock-out
GJA1P1	22.6516	0.397234	0.658267	0.603455	0.546206	0.727611	2	E-G	CPSF6 Knock-out
SIRT5	1168.43	-0.342143	0.0839673	-4.07472	4.60699e-05	0.000297001	2	E-G	CPSF6 Knock-out
AQR	11324.8	-0.0645798	0.0455275	-1.41848	0.156051	0.315633	2	E-G	CPSF6 Knock-out
MFAP3	2209.21	0.174208	0.0585135	2.97723	0.00290865	0.0121351	2	E-G	CPSF6 Knock-out
RPF1	2886.63	0.207332	0.079986	2.59211	0.00953896	0.0336228	2	E-G	CPSF6 Knock-out
HK3	5.57701	0.594692	1.88585	0.315344	0.752501	0.870287	2	E-G	CPSF6 Knock-out
ANKK1	30.4308	-0.0648638	0.570791	-0.113638	0.909525	0.957084	2	E-G	CPSF6 Knock-out
RHOXF1-AS1	24.7354	-0.398476	0.634738	-0.62778	0.530148	0.716031	2	E-G	CPSF6 Knock-out
HIGD1AP18	18.5517	0.403558	0.817619	0.493576	0.621605	0.783354	2	E-G	CPSF6 Knock-out
NBEA	166.849	-0.194818	0.267362	-0.728666	0.466206	0.662974	2	E-G	CPSF6 Knock-out
ZNF750	212.092	-0.323024	0.243133	-1.32859	0.183983	0.355233	2	E-G	CPSF6 Knock-out
AL353644.6	10500.9	0.446846	0.237804	1.87905	0.0602371	0.152601	2	E-G	CPSF6 Knock-out
GK-IT1	50.9394	0.220654	0.341901	0.645376	0.518684	0.70701	2	E-G	CPSF6 Knock-out
ZNF19	227.622	-0.746265	0.196831	-3.7914	0.000149799	0.000864573	2	E-G	CPSF6 Knock-out
AC017028.10	15.4751	-0.979463	0.797191	-1.22864	0.219206	0.401291	2	E-G	CPSF6 Knock-out
ZSWIM5	596.497	0.938668	0.134083	7.00065	2.54774e-12	4.98752e-11	2	E-G	CPSF6 Knock-out
PDE6C	52.2707	-0.647668	0.365524	-1.77189	0.0764128	0.184114	2	E-G	CPSF6 Knock-out
CLDN4	17.9463	-0.237659	0.6749	-0.35214	0.724733	0.853627	2	E-G	CPSF6 Knock-out
TADA2B	3315.99	-0.178118	0.077014	-2.3128	0.0207338	0.0648213	2	E-G	CPSF6 Knock-out
OCIAD1-AS1	20.8944	0.292223	0.496543	0.588515	0.556187	0.735343	2	E-G	CPSF6 Knock-out
NPC2	1601.3	0.0238966	0.0861112	0.277508	0.78139	0.887629	2	E-G	CPSF6 Knock-out
AL450226.2	66.3341	0.0273214	0.325394	0.0839642	0.933085	0.968888	2	E-G	CPSF6 Knock-out
RP11-408P14.1	551.997	0.108136	0.117584	0.919644	0.357759	0.561154	2	E-G	CPSF6 Knock-out
RP3-470B24.5	10.1762	2.0097	1.12926	1.77966	0.0751309	0.181616	2	E-G	CPSF6 Knock-out
PPM1D	3138.44	0.335547	0.0590986	5.67775	1.36481e-08	1.65375e-07	2	E-G	CPSF6 Knock-out
LACE1	380.079	-0.932017	0.127727	-7.29692	2.94424e-13	6.40656e-12	2	E-G	CPSF6 Knock-out
C11orf45	25.5606	-0.205587	0.39896	-0.515308	0.606338	0.771479	2	E-G	CPSF6 Knock-out
RP11-60E8.4	7.82501	-0.983775	0.707293	-1.3909	0.164255	0.327682	2	E-G	CPSF6 Knock-out
FAM3C	3283.04	-0.055737	0.0657862	-0.847246	0.396858	0.60056	2	E-G	CPSF6 Knock-out
MTND5P14	152.793	-0.854851	0.261899	-3.26405	0.00109831	0.00515417	2	E-G	CPSF6 Knock-out
RNU7-170P	6.35179	0.227052	0.709948	0.319814	0.749109	0.868486	2	E-G	CPSF6 Knock-out
DUS2	1428.97	-0.0756019	0.0722081	-1.047	0.2951	0.493095	2	E-G	CPSF6 Knock-out
RNA5SP323	34.9592	-0.505127	0.424107	-1.19104	0.233639	0.419495	2	E-G	CPSF6 Knock-out
ARGLU1	8633.73	-0.3287	0.0457445	-7.18557	6.69276e-13	1.39533e-11	2	E-G	CPSF6 Knock-out
CAMK2N1	35.962	0.0938606	0.414026	0.226702	0.820655	0.910872	2	E-G	CPSF6 Knock-out
RP11-727F15.12	88.4141	-0.315769	0.269255	-1.17275	0.240895	0.428737	2	E-G	CPSF6 Knock-out
RP11-466F5.4	28.457	-0.925342	0.589183	-1.57055	0.116287	0.254455	2	E-G	CPSF6 Knock-out
RP11-503G7.2	15.0588	-1.82643	1.09878	-1.66223	0.0964658	0.22063	2	E-G	CPSF6 Knock-out
PPP3CB-AS1	892.594	-1.16682	0.130331	-8.95278	3.46639e-19	1.40975e-17	2	E-G	CPSF6 Knock-out
CTSF	654.783	0.284946	0.157414	1.81017	0.0702693	0.172566	2	E-G	CPSF6 Knock-out
RP11-173B14.4	15.3252	-0.43969	0.604063	-0.727889	0.466682	0.663129	2	E-G	CPSF6 Knock-out
MAN2B1	14019.1	-0.0415862	0.05445	-0.763749	0.445017	0.644297	2	E-G	CPSF6 Knock-out
LRRC57	2226.92	0.0125705	0.0647845	0.194036	0.846148	0.925003	2	E-G	CPSF6 Knock-out
RP11-278C7.2	22.9457	-0.246656	0.550166	-0.44833	0.653915	0.806294	2	E-G	CPSF6 Knock-out
TAS2R4	167.878	-1.10281	0.2639	-4.1789	2.92919e-05	0.000197065	2	E-G	CPSF6 Knock-out
KLC4	1096.17	-0.0820504	0.0780166	-1.0517	0.292935	0.490964	2	E-G	CPSF6 Knock-out
FOXP1-IT1	183.406	-0.608458	0.231723	-2.62579	0.00864473	0.0309929	2	E-G	CPSF6 Knock-out
RP11-22B23.2	89.6951	-0.753972	0.248769	-3.03081	0.00243897	0.0104056	2	E-G	CPSF6 Knock-out
SMIM7	3360.88	-0.353334	0.0450163	-7.84903	4.19278e-15	1.10968e-13	2	E-G	CPSF6 Knock-out
DEFB109P3	8.14585	-0.0979828	0.862827	-0.11356	0.909586	0.957084	2	E-G	CPSF6 Knock-out
RP11-312B8.2	25.0537	0.106186	0.508623	0.208772	0.834626	0.919034	2	E-G	CPSF6 Knock-out
DCBLD1	531.885	-0.316985	0.131076	-2.41834	0.0155916	0.051195	2	E-G	CPSF6 Knock-out
RP3-368A4.5	1173.03	-0.0535938	0.157991	-0.33922	0.734444	0.859618	2	E-G	CPSF6 Knock-out
LSM2	4416.26	0.135991	0.0766924	1.7732	0.076196	0.183745	2	E-G	CPSF6 Knock-out
METTL23	2034.29	-0.10117	0.070949	-1.42595	0.153882	0.312361	2	E-G	CPSF6 Knock-out
AP000711.1	3.26005	-0.546393	1.84212	-0.296611	0.766763	0.878804	2	E-G	CPSF6 Knock-out
XXbac-BPG181B23.7	153.932	0.0441735	0.228007	0.193737	0.846382	0.925109	2	E-G	CPSF6 Knock-out
PRPF40B	443.295	-0.0148008	0.138341	-0.106988	0.914799	0.95984	2	E-G	CPSF6 Knock-out
SYN1	83.5768	0.607584	0.318507	1.9076	0.0564426	0.144934	2	E-G	CPSF6 Knock-out
RP11-135J2.3	40.767	0.118473	0.412267	0.287369	0.77383	0.883385	2	E-G	CPSF6 Knock-out
ATE1	3134.76	0.248315	0.0715699	3.46955	0.000521325	0.0026563	2	E-G	CPSF6 Knock-out
RPL31P49	17.0989	0.58254	0.507576	1.14769	0.251096	0.441237	2	E-G	CPSF6 Knock-out
PTGFRN	3685.87	1.15014	0.0804386	14.2983	2.24065e-46	5.62597e-44	2	E-G	CPSF6 Knock-out
CTB-41I6.1	72.4266	-0.572775	0.289121	-1.98109	0.0475809	0.12665	2	E-G	CPSF6 Knock-out
RP4-777O23.2	23.6573	-0.796101	0.504654	-1.57752	0.114676	0.251803	2	E-G	CPSF6 Knock-out
AKT3	6917.88	-0.313553	0.0450741	-6.95639	3.49114e-12	6.74292e-11	2	E-G	CPSF6 Knock-out
LARP1	46022.6	0.277319	0.0511393	5.42282	5.86668e-08	6.42886e-07	2	E-G	CPSF6 Knock-out
GNLY	3428.37	1.48402	0.160942	9.22084	2.94788e-20	1.28193e-18	2	E-G	CPSF6 Knock-out
PRKAA1	7266.52	-0.694124	0.0875296	-7.93017	2.18849e-15	5.95595e-14	2	E-G	CPSF6 Knock-out
VPS9D1	986.844	-0.0224318	0.0911902	-0.245989	0.80569	0.902312	2	E-G	CPSF6 Knock-out
ATP1B2	43.2467	0.535616	0.478374	1.11966	0.262859	0.455951	2	E-G	CPSF6 Knock-out
RP11-455F5.5	753.032	-0.299561	0.146169	-2.04941	0.0404216	0.11098	2	E-G	CPSF6 Knock-out
RP11-517P14.2	106.7	0.224468	0.269651	0.832438	0.405162	0.607996	2	E-G	CPSF6 Knock-out
LINC01578	6526.95	-0.0407916	0.0636854	-0.640517	0.521837	0.709345	2	E-G	CPSF6 Knock-out
MKI67	114753	-0.01334	0.0459824	-0.290111	0.771731	0.882093	2	E-G	CPSF6 Knock-out
AC003006.7	7.49614	-1.08532	1.00933	-1.07529	0.282246	0.478671	2	E-G	CPSF6 Knock-out
NFIC	3927.96	0.140594	0.0722749	1.94527	0.0517424	0.135528	2	E-G	CPSF6 Knock-out
RP11-1C8.7	5.69182	4.45546	1.94923	2.28576	0.0222684	0.0686525	2	E-G	CPSF6 Knock-out
AURKC	38.0831	0.0312159	0.444485	0.0702294	0.944011	0.973992	2	E-G	CPSF6 Knock-out
AC108488.4	88.669	-0.340224	0.261778	-1.29966	0.193717	0.368583	2	E-G	CPSF6 Knock-out
MCM3AP-AS1	1389.34	-0.301753	0.0993571	-3.03705	0.00238906	0.0102274	2	E-G	CPSF6 Knock-out
CA3	8.56642	1.08664	1.1738	0.925743	0.354579	0.557773	2	E-G	CPSF6 Knock-out
PALM2-AKAP2	864.159	-1.7485	2.16914	-0.806081	0.420196	0.621895	2	E-G	CPSF6 Knock-out
RP11-107E5.4	9.05358	0.57028	1.04944	0.543416	0.586844	0.757813	2	E-G	CPSF6 Knock-out
AC005757.6	36.7198	-0.315146	0.482156	-0.653617	0.513359	0.702423	2	E-G	CPSF6 Knock-out
MTUS2	65.4618	1.39882	0.295914	4.7271	2.2775e-06	1.90636e-05	2	E-G	CPSF6 Knock-out
MIR503	6.12465	1.17806	0.936148	1.25841	0.208244	0.387554	2	E-G	CPSF6 Knock-out
GBA2	3682.23	-0.169353	0.0619511	-2.73365	0.0062636	0.0235712	2	E-G	CPSF6 Knock-out
AC092636.2	27.6978	-0.188951	0.727229	-0.259824	0.795	0.896389	2	E-G	CPSF6 Knock-out
SPAG5-AS1	552.075	-0.134994	0.136365	-0.989948	0.3222	0.523563	2	E-G	CPSF6 Knock-out
ASTE1	1196.35	-0.0739261	0.0851333	-0.868357	0.385199	0.588934	2	E-G	CPSF6 Knock-out
IDI1	7465.55	-0.0926621	0.0776929	-1.19267	0.232999	0.418606	2	E-G	CPSF6 Knock-out
STAC	4.96012	-0.240548	1.52627	-0.157606	0.874768	0.939961	2	E-G	CPSF6 Knock-out
HNRNPA1P14	63.1118	-0.679788	0.357911	-1.89932	0.0575222	0.147156	2	E-G	CPSF6 Knock-out
CTD-2012J19.2	21.4163	-0.362592	0.42326	-0.856665	0.39163	0.595582	2	E-G	CPSF6 Knock-out
RP11-712B9.6	85.1326	-0.392863	0.232878	-1.68699	0.0916057	0.211558	2	E-G	CPSF6 Knock-out
NPM1P26	146.951	0.275773	0.21184	1.3018	0.192986	0.367614	2	E-G	CPSF6 Knock-out
RNA5SP33	13.1613	-0.31564	0.531951	-0.593363	0.552939	0.732961	2	E-G	CPSF6 Knock-out
TESC-AS1	9.09515	2.29017	1.00981	2.26793	0.0233335	0.071259	2	E-G	CPSF6 Knock-out
POLR3GL	924.021	-0.361946	0.0978549	-3.69881	0.000216615	0.00120655	2	E-G	CPSF6 Knock-out
SMPD5	37.4176	0.859347	0.453396	1.89536	0.058045	0.148163	2	E-G	CPSF6 Knock-out
NAP1L3	200.399	-0.627016	0.176642	-3.54964	0.000385761	0.00202709	2	E-G	CPSF6 Knock-out
KPNA4	12637.1	-0.035229	0.0609563	-0.577938	0.563306	0.740342	2	E-G	CPSF6 Knock-out
PHACTR1	316.31	0.307268	0.175874	1.74709	0.0806211	0.191898	2	E-G	CPSF6 Knock-out
RP11-763B22.3	20.9866	-0.70059	0.520884	-1.345	0.178624	0.347794	2	E-G	CPSF6 Knock-out
RP11-510M2.2	59.9685	-0.523835	0.286413	-1.82895	0.0674066	0.166781	2	E-G	CPSF6 Knock-out
KIAA1683	434.883	-0.826108	0.1477	-5.59315	2.22983e-08	2.60884e-07	2	E-G	CPSF6 Knock-out
LRRN2	465.708	0.489134	0.162369	3.01248	0.00259121	0.0109692	2	E-G	CPSF6 Knock-out
ERAL1	3629.32	0.137977	0.0611843	2.2551	0.0241269	0.0732485	2	E-G	CPSF6 Knock-out
KIF16B	1809.42	0.225485	0.0657739	3.42818	0.000607645	0.00304436	2	E-G	CPSF6 Knock-out
CTD-2293H3.1	115.431	-0.159903	0.186904	-0.855535	0.392255	0.596218	2	E-G	CPSF6 Knock-out
MATR3	41740.3	-0.0610822	0.0567007	-1.07728	0.281357	0.477668	2	E-G	CPSF6 Knock-out
GNAI1	344.527	-0.274154	0.146885	-1.86645	0.061978	0.156135	2	E-G	CPSF6 Knock-out
RP11-1029J19.4	54.0633	-0.121621	0.399462	-0.304461	0.760776	0.875303	2	E-G	CPSF6 Knock-out
CHKB	3377.08	-0.0735201	0.155357	-0.473233	0.636047	0.793787	2	E-G	CPSF6 Knock-out
RP11-147L13.11	2049.69	-0.369182	0.0591713	-6.23921	4.39782e-10	6.53225e-09	2	E-G	CPSF6 Knock-out
CTC-329H14.1	15.8754	0.399628	0.867039	0.460911	0.644862	0.800515	2	E-G	CPSF6 Knock-out
SARNP	2582.61	0.16044	0.217864	0.736424	0.461473	0.658644	2	E-G	CPSF6 Knock-out
RP11-166P13.4	287.798	-0.310014	0.149597	-2.07232	0.0382352	0.106127	2	E-G	CPSF6 Knock-out
AP000295.9	61.0736	-0.795049	0.452238	-1.75803	0.0787419	0.188523	2	E-G	CPSF6 Knock-out
CTD-2555O16.4	419.398	-0.288549	0.156001	-1.84966	0.0643622	0.160892	2	E-G	CPSF6 Knock-out
CALY	7.0604	1.2137	1.56731	0.774385	0.438703	0.638808	2	E-G	CPSF6 Knock-out
SCO1	4268.36	-0.484072	0.0574752	-8.42227	3.69244e-17	1.20746e-15	2	E-G	CPSF6 Knock-out
FAM167B	48.7789	-0.00728804	0.460293	-0.0158335	0.987367	0.994001	2	E-G	CPSF6 Knock-out
RAB32	43.1007	-0.453664	0.502352	-0.90308	0.366484	0.570088	2	E-G	CPSF6 Knock-out
ERCC3	6237.71	0.031288	0.0394471	0.793163	0.427683	0.628546	2	E-G	CPSF6 Knock-out
HAS3	303.722	-0.242668	0.170999	-1.41912	0.155864	0.315322	2	E-G	CPSF6 Knock-out
SPATA33	1233	-0.0402276	0.0798874	-0.503553	0.614575	0.777645	2	E-G	CPSF6 Knock-out
PLA1A	6.36202	-1.90257	1.45389	-1.3086	0.190669	0.364441	2	E-G	CPSF6 Knock-out
HNRNPKP2	20.4761	0.200114	0.410778	0.487158	0.626146	0.786907	2	E-G	CPSF6 Knock-out
INO80B	1707.2	0.247181	0.109811	2.25096	0.0243883	0.073902	2	E-G	CPSF6 Knock-out
ZNF622	2557.5	0.192024	0.0685083	2.80293	0.00506411	0.0196159	2	E-G	CPSF6 Knock-out
SLC23A3	349.443	-0.484043	0.182828	-2.64754	0.00810805	0.029401	2	E-G	CPSF6 Knock-out
RP11-44M6.7	3569.79	-0.478611	0.0564253	-8.4822	2.20974e-17	7.42798e-16	2	E-G	CPSF6 Knock-out
RP11-1102P22.1	84.6817	-0.181291	0.299395	-0.605525	0.54483	0.726818	2	E-G	CPSF6 Knock-out
GID8	7608.05	-0.18825	0.0529837	-3.55298	0.00038089	0.00200514	2	E-G	CPSF6 Knock-out
SLC7A3	6.69849	-2.82469	2.82573	-0.999633	0.317488	0.518405	2	E-G	CPSF6 Knock-out
RP11-47I22.2	90.5863	0.179691	0.358669	0.500995	0.616375	0.779	2	E-G	CPSF6 Knock-out
PISD	2787.03	0.193785	0.0558055	3.47251	0.000515623	0.00263003	2	E-G	CPSF6 Knock-out
UBE2V2P3	45.8632	-0.838243	0.380854	-2.20096	0.0277391	0.0819236	2	E-G	CPSF6 Knock-out
RP11-1084A12.2	10.6168	-0.677519	0.574763	-1.17878	0.238485	0.425762	2	E-G	CPSF6 Knock-out
RP11-107K17.2	27.4009	1.08083	0.689001	1.56869	0.11672	0.255112	2	E-G	CPSF6 Knock-out
RP11-536C10.12	16.6433	0.707635	0.498575	1.41931	0.155807	0.315272	2	E-G	CPSF6 Knock-out
PIGB	1767.23	-0.176059	0.0813014	-2.16551	0.0303488	0.0880459	2	E-G	CPSF6 Knock-out
MOCOS	40.2728	0.906662	0.469015	1.93312	0.0532213	0.13841	2	E-G	CPSF6 Knock-out
AC009542.2	44.3609	0.247803	0.414123	0.598379	0.549587	0.730094	2	E-G	CPSF6 Knock-out
ENTPD4	7450.34	-0.393823	0.0441171	-8.92676	4.38655e-19	1.77149e-17	2	E-G	CPSF6 Knock-out
CLCC1	2427.49	-0.229718	0.0557198	-4.12273	3.74411e-05	0.000245372	2	E-G	CPSF6 Knock-out
GPX1P1	47.7106	-0.0628335	0.353071	-0.177963	0.858752	0.932199	2	E-G	CPSF6 Knock-out
PAK1	4402.57	-0.111444	0.0710878	-1.5677	0.116951	0.25556	2	E-G	CPSF6 Knock-out
LCA5L	141.588	1.2151	0.297708	4.08151	4.4744e-05	0.000289099	2	E-G	CPSF6 Knock-out
RP11-304F15.7	23.304	-0.844615	0.549728	-1.53642	0.124435	0.267619	2	E-G	CPSF6 Knock-out
DHRS9	1063.31	1.61935	0.112109	14.4445	2.71531e-47	7.19309e-45	2	E-G	CPSF6 Knock-out
CD99L2	2441.85	-0.160757	0.0687659	-2.33774	0.0194006	0.0613574	2	E-G	CPSF6 Knock-out
ZNF786	1184.48	0.117412	0.079797	1.47138	0.141189	0.293709	2	E-G	CPSF6 Knock-out
DDX21	23744.4	0.239701	0.0699113	3.42865	0.0006066	0.00304037	2	E-G	CPSF6 Knock-out
ZDHHC15	124.091	-0.1872	0.234903	-0.796925	0.425495	0.626877	2	E-G	CPSF6 Knock-out
TNRC18	16373	0.0505888	0.0516492	0.97947	0.327348	0.529355	2	E-G	CPSF6 Knock-out
AC002454.1	6.45736	0.354904	1.53969	0.230504	0.8177	0.909142	2	E-G	CPSF6 Knock-out
OBSCN	14758.6	0.0725322	0.0780042	0.92985	0.352449	0.555663	2	E-G	CPSF6 Knock-out
GBP1	13317.9	-0.626487	0.0764283	-8.19705	2.46353e-16	7.54342e-15	2	E-G	CPSF6 Knock-out
RSPO4	22.4088	-2.40039	0.892672	-2.689	0.0071667	0.0264323	2	E-G	CPSF6 Knock-out
RP11-66N24.6	3.87654	1.99458	2.09265	0.953131	0.340523	0.543211	2	E-G	CPSF6 Knock-out
PKP2	32.87	0.318656	0.522981	0.609307	0.542321	0.724743	2	E-G	CPSF6 Knock-out
ABR	14570.6	0.11437	0.0417495	2.73942	0.00615468	0.0232066	2	E-G	CPSF6 Knock-out
RP11-109L13.1	465.162	-0.31081	0.0917159	-3.38883	0.000701915	0.00346695	2	E-G	CPSF6 Knock-out
PPA1	18832.6	0.230068	0.0646618	3.55802	0.000373668	0.00197238	2	E-G	CPSF6 Knock-out
MIR644A	13.3688	0.102439	0.582718	0.175795	0.860455	0.933131	2	E-G	CPSF6 Knock-out
OLA1P1	55.0384	0.0563761	0.274287	0.205537	0.837153	0.920523	2	E-G	CPSF6 Knock-out
TECR	9077.02	0.0999578	0.061596	1.6228	0.104633	0.235265	2	E-G	CPSF6 Knock-out
ZNF440	1811.23	-0.370339	0.0653244	-5.66923	1.43438e-08	1.73152e-07	2	E-G	CPSF6 Knock-out
RP11-423C15.3	19.7778	-0.000328809	0.604874	-0.0005436	0.999566	0.999636	2	E-G	CPSF6 Knock-out
RP11-635L1.3	21.9376	1.6666	0.522818	3.18773	0.00143395	0.00654319	2	E-G	CPSF6 Knock-out
LEXM	24.2565	0.452708	0.467695	0.967957	0.333066	0.535681	2	E-G	CPSF6 Knock-out
TPT1P9	210.864	0.096344	0.159256	0.604963	0.545204	0.72698	2	E-G	CPSF6 Knock-out
PPP1R36	16.8874	0.532363	0.909832	0.585122	0.558465	0.737128	2	E-G	CPSF6 Knock-out
RP11-307I2.1	44.2226	-0.0774817	0.367696	-0.210722	0.833104	0.918058	2	E-G	CPSF6 Knock-out
AL590431.1	39.1254	0.0401291	0.288747	0.138977	0.889469	0.946714	2	E-G	CPSF6 Knock-out
RAB11B	6694.67	0.0269965	0.0554835	0.486568	0.626564	0.787207	2	E-G	CPSF6 Knock-out
RP11-258F1.2	189.584	-0.74406	0.255068	-2.91711	0.00353296	0.0143722	2	E-G	CPSF6 Knock-out
SEPT7P3	6.10071	-0.458748	1.11139	-0.412768	0.679777	0.824458	2	E-G	CPSF6 Knock-out
TNFRSF1A	4613.86	0.0559153	0.0578749	0.966141	0.333974	0.536656	2	E-G	CPSF6 Knock-out
RUNX1	13964.4	-0.429935	0.0608422	-7.06639	1.59013e-12	3.17751e-11	2	E-G	CPSF6 Knock-out
ZNF354A	777.969	-0.22345	0.108192	-2.06532	0.0388928	0.10756	2	E-G	CPSF6 Knock-out
LINC01003	356.113	-0.348443	0.131036	-2.65914	0.00783404	0.0285436	2	E-G	CPSF6 Knock-out
RP11-500M8.7	4.94075	-0.521907	0.960842	-0.543177	0.587008	0.757816	2	E-G	CPSF6 Knock-out
CAMKV	6.75581	2.91346	2.73552	1.06505	0.286854	0.483928	2	E-G	CPSF6 Knock-out
RP5-855F16.1	4.33182	1.48157	1.496	0.99036	0.321998	0.52346	2	E-G	CPSF6 Knock-out
SCO2	866.178	-0.139627	0.124707	-1.11965	0.262865	0.455951	2	E-G	CPSF6 Knock-out
TMEM2	13603.3	0.0479344	0.0434147	1.10411	0.269547	0.463892	2	E-G	CPSF6 Knock-out
RAPH1	788.672	0.814536	0.123539	6.59337	4.29966e-11	7.34197e-10	2	E-G	CPSF6 Knock-out
RP11-98D18.16	8.9938	1.19365	0.909424	1.31254	0.189339	0.362737	2	E-G	CPSF6 Knock-out
LMCD1	279.857	0.551554	0.185961	2.96596	0.00301739	0.0125183	2	E-G	CPSF6 Knock-out
FP671120.7	1244.86	0.549159	0.863727	0.635801	0.524906	0.711848	2	E-G	CPSF6 Knock-out
SNRPCP3	12.4777	-0.672374	0.843586	-0.797042	0.425427	0.626862	2	E-G	CPSF6 Knock-out
ABCA13	28.6614	-3.17382	2.08642	-1.52118	0.128215	0.273548	2	E-G	CPSF6 Knock-out
USP27X-AS1	47.8881	-0.00130341	0.438285	-0.0029739	0.997627	0.998956	2	E-G	CPSF6 Knock-out
RP11-977G19.10	76.7429	0.436593	0.73174	0.596651	0.550741	0.731079	2	E-G	CPSF6 Knock-out
PCNT	11267.1	-0.137154	0.0528594	-2.59469	0.00946756	0.0334147	2	E-G	CPSF6 Knock-out
CHD4	46735.4	0.264557	0.0411578	6.42788	1.29398e-10	2.06543e-09	2	E-G	CPSF6 Knock-out
MIR6779	5.20975	0.902089	0.848771	1.06282	0.287864	0.485094	2	E-G	CPSF6 Knock-out
RNU6-773P	10.8119	-0.483656	0.69135	-0.699582	0.484188	0.677502	2	E-G	CPSF6 Knock-out
GNB2	15737.3	0.292566	0.0689018	4.24614	2.17486e-05	0.000149879	2	E-G	CPSF6 Knock-out
ZNF7	3489.85	-0.080727	0.0561931	-1.4366	0.150832	0.308098	2	E-G	CPSF6 Knock-out
CTD-2013N17.6	150.921	-0.351077	0.196733	-1.78454	0.0743363	0.180137	2	E-G	CPSF6 Knock-out
RTN3P1	12.7499	0.521564	0.577699	0.902831	0.366616	0.570245	2	E-G	CPSF6 Knock-out
POLR3F	1144.07	0.0453294	0.0854338	0.530579	0.59571	0.764054	2	E-G	CPSF6 Knock-out
DOCK5	124.837	-0.662962	0.244168	-2.71518	0.00662389	0.0247234	2	E-G	CPSF6 Knock-out
AC009480.3	4.55519	4.91356	1.84331	2.66562	0.00768463	0.0281056	2	E-G	CPSF6 Knock-out
RP11-298J20.3	54.5225	-0.0424034	0.399629	-0.106107	0.915497	0.960302	2	E-G	CPSF6 Knock-out
TRPT1	1442.16	-0.0915582	0.0784662	-1.16685	0.243271	0.431292	2	E-G	CPSF6 Knock-out
TALDO1	10055.7	0.141324	0.0647695	2.18196	0.0291125	0.0852128	2	E-G	CPSF6 Knock-out
DCP1A	8038.7	-0.0135949	0.0594935	-0.228511	0.819249	0.910247	2	E-G	CPSF6 Knock-out
EGLN1	10637.9	-0.365929	0.079433	-4.60676	4.0899e-06	3.25244e-05	2	E-G	CPSF6 Knock-out
TBC1D2B	17915.8	0.0940209	0.0394516	2.3832	0.0171631	0.0554654	2	E-G	CPSF6 Knock-out
CHCHD1	958.399	0.163236	0.124465	1.3115	0.18969	0.36312	2	E-G	CPSF6 Knock-out
GNL1	7804.65	-0.0423066	0.055981	-0.755732	0.44981	0.64802	2	E-G	CPSF6 Knock-out
PPFIA4	9347.26	-0.186472	0.08408	-2.21779	0.0265693	0.0791733	2	E-G	CPSF6 Knock-out
ZNF273	2012.92	-0.339259	0.0793421	-4.2759	1.9037e-05	0.000132424	2	E-G	CPSF6 Knock-out
LSM6	1099.39	0.14729	0.100037	1.47236	0.140925	0.293318	2	E-G	CPSF6 Knock-out
CHN2	69.208	-1.5923	0.280684	-5.67294	1.40364e-08	1.69866e-07	2	E-G	CPSF6 Knock-out
MRPL55	1078.19	0.137216	0.0945628	1.45105	0.146765	0.301819	2	E-G	CPSF6 Knock-out
TXLNA	23467.8	0.114242	0.0451718	2.52905	0.0114372	0.0393482	2	E-G	CPSF6 Knock-out
RP11-203M5.7	250.044	0.273328	0.176767	1.54627	0.12204	0.263907	2	E-G	CPSF6 Knock-out
NYNRIN	60.5009	0.724322	0.406604	1.78139	0.074848	0.181145	2	E-G	CPSF6 Knock-out
AL049539.1	14.9817	-0.28553	0.636718	-0.448441	0.653835	0.806294	2	E-G	CPSF6 Knock-out
ZBTB2	4997.15	0.156475	0.0656252	2.38437	0.0171082	0.0553192	2	E-G	CPSF6 Knock-out
RN7SL225P	16.4224	0.614754	0.706992	0.869535	0.384554	0.588229	2	E-G	CPSF6 Knock-out
SNORA80B	10.4186	0.380032	0.624312	0.608721	0.542709	0.725027	2	E-G	CPSF6 Knock-out
RP11-351I21.11	24.412	-0.35392	0.401902	-0.880611	0.378528	0.582096	2	E-G	CPSF6 Knock-out
UBE2A	6690.5	-0.409675	0.0628054	-6.52293	6.89479e-11	1.14615e-09	2	E-G	CPSF6 Knock-out
KLF17P1	15.7699	0.147899	1.00013	0.14788	0.882438	0.943578	2	E-G	CPSF6 Knock-out
MIR221	11.8119	1.03054	0.549627	1.87498	0.0607952	0.153745	2	E-G	CPSF6 Knock-out
UBE2CP2	15.4274	-0.00695055	0.776558	-0.00895046	0.992859	0.996786	2	E-G	CPSF6 Knock-out
MC1R	813.19	0.170645	0.12242	1.39393	0.163338	0.326379	2	E-G	CPSF6 Knock-out
MYLK3	46.8267	0.63919	0.367761	1.73806	0.0822007	0.194792	2	E-G	CPSF6 Knock-out
RP11-666A8.8	38.7095	-0.288477	0.373141	-0.773105	0.43946	0.639458	2	E-G	CPSF6 Knock-out
SLC39A5	54.0857	-0.270921	0.423056	-0.640392	0.521918	0.709361	2	E-G	CPSF6 Knock-out
CTD-3131K8.2	180.354	0.375116	0.203809	1.84053	0.0656904	0.163391	2	E-G	CPSF6 Knock-out
MIR135A1	26.0482	0.00154815	0.360117	0.00429902	0.99657	0.99848	2	E-G	CPSF6 Knock-out
RP11-349G13.3	38.7904	-0.0137336	0.59279	-0.0231677	0.981516	0.991369	2	E-G	CPSF6 Knock-out
CLDN1	605.242	0.733008	0.129648	5.65382	1.56925e-08	1.88095e-07	2	E-G	CPSF6 Knock-out
RP11-363D14.1	16.8963	1.09508	0.72561	1.50919	0.131251	0.278044	2	E-G	CPSF6 Knock-out
LINC01224	23.3362	-2.43978	0.615928	-3.96114	7.45916e-05	0.000460615	2	E-G	CPSF6 Knock-out
TTC13	2159.9	-0.188607	0.0859933	-2.19327	0.0282878	0.0832152	2	E-G	CPSF6 Knock-out
RPL41	33996.5	0.00730134	0.0705338	0.103515	0.917554	0.961088	2	E-G	CPSF6 Knock-out
RP11-110G21.1	149.426	-0.85582	0.288038	-2.9712	0.00296639	0.0123279	2	E-G	CPSF6 Knock-out
ATAD5	15402.7	0.104081	0.0400286	2.60016	0.00931796	0.0329766	2	E-G	CPSF6 Knock-out
TUBAP2	283.288	0.0665863	0.149036	0.446779	0.655034	0.806985	2	E-G	CPSF6 Knock-out
LINC00944	24.0491	1.95647	0.554474	3.52852	0.000417887	0.00217414	2	E-G	CPSF6 Knock-out
RP11-611O2.5	9.53292	-0.489026	0.663283	-0.737281	0.460951	0.658095	2	E-G	CPSF6 Knock-out
TCAF1	6090.27	0.669697	0.0670754	9.98424	1.78665e-23	1.01355e-21	2	E-G	CPSF6 Knock-out
HSPA4	11708.6	0.194725	0.0694572	2.80352	0.00505476	0.0195888	2	E-G	CPSF6 Knock-out
HNRNPU	55860.1	-0.152318	0.0432492	-3.52187	0.000428509	0.0022226	2	E-G	CPSF6 Knock-out
NSUN5P1	5093.63	-0.0556726	0.0655725	-0.849023	0.395868	0.599701	2	E-G	CPSF6 Knock-out
AC145212.1	17.6478	-0.0866038	0.478981	-0.180809	0.856518	0.930822	2	E-G	CPSF6 Knock-out
RP4-800G7.2	268.032	-0.0654618	0.206217	-0.317441	0.750909	0.869352	2	E-G	CPSF6 Knock-out
IGHV3-35	25.1218	-0.182686	0.491606	-0.37161	0.710183	0.844968	2	E-G	CPSF6 Knock-out
TDRD3	2219.43	-0.266056	0.0658393	-4.04098	5.32272e-05	0.000338681	2	E-G	CPSF6 Knock-out
RP11-568G11.5	18.3447	0.104147	0.535043	0.194652	0.845666	0.924747	2	E-G	CPSF6 Knock-out
CMPK2	629.779	-0.769319	0.155925	-4.93392	8.05966e-07	7.31832e-06	2	E-G	CPSF6 Knock-out
SYF2P2	8.9353	-2.7916	1.24779	-2.23723	0.0252712	0.0760856	2	E-G	CPSF6 Knock-out
RP11-429B14.1	48.9555	0.424369	0.344219	1.23285	0.217633	0.399095	2	E-G	CPSF6 Knock-out
UVRAG	2743.87	0.113288	0.0627817	1.80448	0.0711564	0.17417	2	E-G	CPSF6 Knock-out
POU2F1	9097.85	-0.163697	0.047173	-3.47013	0.000520197	0.00265102	2	E-G	CPSF6 Knock-out
GNG12	34.0533	1.37464	0.504846	2.72289	0.00647135	0.0242267	2	E-G	CPSF6 Knock-out
SND1-IT1	30.4749	1.4417	0.61938	2.32765	0.0199309	0.0627526	2	E-G	CPSF6 Knock-out
TMEM231	354.204	0.317204	0.160878	1.97171	0.0486431	0.129025	2	E-G	CPSF6 Knock-out
IL20RB	110.798	1.09639	0.261407	4.19418	2.73866e-05	0.000185327	2	E-G	CPSF6 Knock-out
C11orf16	26.4484	0.13674	0.555728	0.246056	0.805639	0.902289	2	E-G	CPSF6 Knock-out
CSPG5	100.558	0.213763	0.314393	0.679924	0.496553	0.687771	2	E-G	CPSF6 Knock-out
HSD11B1	205.976	2.38026	0.238576	9.97695	1.92291e-23	1.08234e-21	2	E-G	CPSF6 Knock-out
DNM1P46	344.319	-0.277046	0.133941	-2.06842	0.0386008	0.106885	2	E-G	CPSF6 Knock-out
CDCA2	8995.08	0.0626372	0.0620702	1.00914	0.312909	0.51334	2	E-G	CPSF6 Knock-out
CLCN3	6328.58	-0.109881	0.0483781	-2.2713	0.0231291	0.0707695	2	E-G	CPSF6 Knock-out
UBL5	2689.2	0.042559	0.0791396	0.537771	0.590735	0.760334	2	E-G	CPSF6 Knock-out
PRR5-ARHGAP8	24.8222	-0.15821	0.641925	-0.246462	0.805325	0.902182	2	E-G	CPSF6 Knock-out
KRIT1	4022.45	-0.128158	0.0579436	-2.21177	0.0269828	0.0801407	2	E-G	CPSF6 Knock-out
RPSAP8	9.61113	0.160844	0.628973	0.255725	0.798163	0.898056	2	E-G	CPSF6 Knock-out
CTC-308K20.3	11.5344	0.924933	0.657957	1.40577	0.159794	0.321111	2	E-G	CPSF6 Knock-out
RP11-589M4.1	8.15259	-1.41305	0.698696	-2.02241	0.0431335	0.116881	2	E-G	CPSF6 Knock-out
GNB4	1233.29	0.0489336	0.112169	0.436249	0.662656	0.812355	2	E-G	CPSF6 Knock-out
RP5-1092A3.4	200.89	-0.50801	0.210581	-2.41243	0.0158467	0.0518732	2	E-G	CPSF6 Knock-out
IL11RA	2262.26	-0.518915	0.101703	-5.10225	3.35634e-07	3.25216e-06	2	E-G	CPSF6 Knock-out
C12orf76	1394.59	-0.511475	0.0940674	-5.43733	5.40859e-08	5.95853e-07	2	E-G	CPSF6 Knock-out
WDR86	88.8197	-1.09386	0.195881	-5.5843	2.34637e-08	2.7301e-07	2	E-G	CPSF6 Knock-out
SLC25A24P1	5.62663	2.4094	1.56505	1.5395	0.123682	0.266494	2	E-G	CPSF6 Knock-out
MYH10	10243.7	0.257491	0.0500847	5.14112	2.73112e-07	2.69426e-06	2	E-G	CPSF6 Knock-out
CRELD1	1344.32	0.134063	0.0764339	1.75397	0.0794351	0.189749	2	E-G	CPSF6 Knock-out
AATK-AS1	7.82219	-0.226411	1.21158	-0.186873	0.85176	0.92866	2	E-G	CPSF6 Knock-out
VDAC1P6	178.17	0.240104	0.149977	1.60094	0.10939	0.243441	2	E-G	CPSF6 Knock-out
RP11-241K18.2	8.34235	0.59768	1.16264	0.51407	0.607203	0.771902	2	E-G	CPSF6 Knock-out
SLC44A1	2687.19	-0.397022	0.0974311	-4.0749	4.60344e-05	0.000296838	2	E-G	CPSF6 Knock-out
AC103563.8	76.4643	-0.25813	0.311587	-0.828437	0.407423	0.610215	2	E-G	CPSF6 Knock-out
RP11-51F16.9	40.3283	-0.863638	0.332346	-2.59861	0.00936022	0.0331099	2	E-G	CPSF6 Knock-out
RP4-604A21.1	10.197	2.33456	0.953317	2.44888	0.0143301	0.0477533	2	E-G	CPSF6 Knock-out
TRG-AS1	1373.48	-0.559818	0.0817242	-6.85009	7.38025e-12	1.382e-10	2	E-G	CPSF6 Knock-out
RP11-480I12.10	9.05161	0.145393	1.03551	0.140408	0.888338	0.946138	2	E-G	CPSF6 Knock-out
MCM3	30366.5	-0.0046091	0.0547848	-0.0841311	0.932952	0.968888	2	E-G	CPSF6 Knock-out
GNPTG	1666.17	-0.0460176	0.0654033	-0.703598	0.481683	0.675634	2	E-G	CPSF6 Knock-out
GTF2IP7	142.788	-0.179211	0.251693	-0.712022	0.476451	0.671395	2	E-G	CPSF6 Knock-out
RP11-79M19.2	187.609	-0.149226	0.169109	-0.882425	0.377547	0.581112	2	E-G	CPSF6 Knock-out
RP11-29G8.3	793.306	-0.564172	0.148783	-3.79192	0.000149489	0.000862951	2	E-G	CPSF6 Knock-out
LINC00998	2116.44	0.196134	0.0880414	2.22775	0.0258971	0.0775335	2	E-G	CPSF6 Knock-out
SYNJ2	4703.88	0.100703	0.0453275	2.22168	0.026305	0.0785478	2	E-G	CPSF6 Knock-out
PTH2R	10.9437	0.554587	1.21943	0.454792	0.649259	0.803057	2	E-G	CPSF6 Knock-out
HS2ST1	5414.66	-0.884289	0.079913	-11.0656	1.84129e-28	1.57031e-26	2	E-G	CPSF6 Knock-out
BCRP2	32.4403	-0.620177	0.367193	-1.68897	0.0912258	0.210917	2	E-G	CPSF6 Knock-out
TRAFD1	7120.58	0.294544	0.0556617	5.29169	1.2119e-07	1.26697e-06	2	E-G	CPSF6 Knock-out
RP11-665C16.9	190.88	0.315365	0.149333	2.11182	0.0347017	0.0981115	2	E-G	CPSF6 Knock-out
ITGA2	1133.66	0.230641	0.0867601	2.65838	0.00785179	0.028601	2	E-G	CPSF6 Knock-out
RP11-332L8.1	5.23339	-2.08452	1.11768	-1.86504	0.0621761	0.156538	2	E-G	CPSF6 Knock-out
PPP4R3A	17054.7	0.0864539	0.0399309	2.16509	0.0303807	0.088112	2	E-G	CPSF6 Knock-out
RP3-465N24.6	50.9429	-0.49238	0.425598	-1.15691	0.247308	0.436548	2	E-G	CPSF6 Knock-out
RPSAP26	29.0066	0.00717049	0.594358	0.0120643	0.990374	0.995442	2	E-G	CPSF6 Knock-out
RP11-80A15.1	10.8947	0.462826	1.25501	0.368781	0.712291	0.846186	2	E-G	CPSF6 Knock-out
CASP1P2	56.197	-0.480627	0.259135	-1.85473	0.0636341	0.159458	2	E-G	CPSF6 Knock-out
NANOS1	252.67	0.000639141	0.222777	0.00286897	0.997711	0.998956	2	E-G	CPSF6 Knock-out
RP11-526K21.2	12.9462	-0.0982401	0.626094	-0.156909	0.875316	0.940159	2	E-G	CPSF6 Knock-out
GTF2F1	7939.99	0.191355	0.0565487	3.3839	0.000714631	0.00352313	2	E-G	CPSF6 Knock-out
AC005702.4	8.38686	0.559027	0.628913	0.888877	0.374069	0.577823	2	E-G	CPSF6 Knock-out
CFTR	5.80376	3.82082	1.35854	2.81244	0.00491666	0.0191358	2	E-G	CPSF6 Knock-out
RP11-266J6.2	21.49	-0.995597	0.648063	-1.53627	0.124473	0.267664	2	E-G	CPSF6 Knock-out
UNG	8294.58	-0.0855372	0.0634851	-1.34736	0.177865	0.346712	2	E-G	CPSF6 Knock-out
ITPK1	7772.02	0.0922074	0.0596369	1.54615	0.122069	0.263928	2	E-G	CPSF6 Knock-out
FAM83A	7.48318	0.459891	1.1962	0.38446	0.700638	0.838483	2	E-G	CPSF6 Knock-out
EEF1DP4	5.01367	3.43119	1.84297	1.86177	0.0626358	0.157551	2	E-G	CPSF6 Knock-out
FAM24B	244.518	-0.219646	0.213957	-1.02659	0.304613	0.504013	2	E-G	CPSF6 Knock-out
MIR6738	28.4373	-0.557531	0.506077	-1.10167	0.270604	0.465113	2	E-G	CPSF6 Knock-out
FILIP1L	557.899	0.508551	0.185527	2.74112	0.0061231	0.0231117	2	E-G	CPSF6 Knock-out
LA16c-358B7.3	971.625	-0.547526	0.177764	-3.08008	0.00206945	0.00903058	2	E-G	CPSF6 Knock-out
NLN	2207.65	-0.131477	0.0990092	-1.32793	0.184202	0.355584	2	E-G	CPSF6 Knock-out
IBA57	2067.46	-0.113008	0.0649269	-1.74054	0.0817648	0.193982	2	E-G	CPSF6 Knock-out
TMEM35	3.22707	1.16274	2.02186	0.575084	0.565234	0.741533	2	E-G	CPSF6 Knock-out
ZNF582	224.138	-0.230787	0.183399	-1.25839	0.208252	0.387554	2	E-G	CPSF6 Knock-out
TPM3P6	201.569	-0.145046	0.15526	-0.934215	0.350193	0.553254	2	E-G	CPSF6 Knock-out
RP11-16C1.2	718.289	0.0681899	0.147723	0.461608	0.644363	0.800291	2	E-G	CPSF6 Knock-out
SERBP1P3	6.3788	-0.469024	0.950757	-0.493316	0.621789	0.783443	2	E-G	CPSF6 Knock-out
ZNF442	95.0083	-0.0687251	0.270655	-0.253921	0.799556	0.898719	2	E-G	CPSF6 Knock-out
CISD3	2471.54	0.10962	0.0658687	1.66423	0.0960673	0.219945	2	E-G	CPSF6 Knock-out
FAM126A	14399	-1.04748	0.0914581	-11.4531	2.26943e-30	2.21384e-28	2	E-G	CPSF6 Knock-out
PSME1	17371.9	-0.0276631	0.070813	-0.39065	0.696056	0.835343	2	E-G	CPSF6 Knock-out
TP53TG3D	14.9835	0.866069	1.00944	0.857973	0.390907	0.594796	2	E-G	CPSF6 Knock-out
RNA5SP203	18.0267	-0.491156	0.483152	-1.01657	0.30936	0.50925	2	E-G	CPSF6 Knock-out
ADCK3	5434.47	-0.133815	0.0610159	-2.19312	0.0282985	0.0832196	2	E-G	CPSF6 Knock-out
ST13P14	5.17477	0.507536	1.37421	0.369329	0.711882	0.84591	2	E-G	CPSF6 Knock-out
MTOR	10513.6	-0.0496153	0.0629544	-0.788116	0.430629	0.631156	2	E-G	CPSF6 Knock-out
NASP	10016.4	-0.0753734	0.0591306	-1.27469	0.202418	0.380077	2	E-G	CPSF6 Knock-out
LIN9	1864.85	-0.03404	0.0860014	-0.395807	0.692247	0.833018	2	E-G	CPSF6 Knock-out
C8orf17	48.0052	-0.0463661	0.464983	-0.0997157	0.92057	0.96226	2	E-G	CPSF6 Knock-out
RP11-3D4.4	8.90725	-0.965364	0.729142	-1.32397	0.185512	0.357444	2	E-G	CPSF6 Knock-out
EEF1G	150390	0.0436144	0.0788565	0.553086	0.580204	0.753097	2	E-G	CPSF6 Knock-out
AC016739.2	162.326	0.141713	0.208268	0.680438	0.496227	0.687518	2	E-G	CPSF6 Knock-out
CCDC144B	2263.31	-0.0186	0.0902384	-0.206121	0.836696	0.920316	2	E-G	CPSF6 Knock-out
RNU6-838P	18.0623	-0.0492466	0.539805	-0.0912303	0.92731	0.965878	2	E-G	CPSF6 Knock-out
SLC2A9	51.6302	-0.201446	0.5	-0.402891	0.687028	0.829671	2	E-G	CPSF6 Knock-out
RAB10	10821.6	-0.565852	0.0903326	-6.2641	3.74979e-10	5.61011e-09	2	E-G	CPSF6 Knock-out
CXorf65	468.42	-0.661184	0.116193	-5.6904	1.26744e-08	1.54159e-07	2	E-G	CPSF6 Knock-out
PROSC	5976.14	0.207233	0.0563289	3.67899	0.000234162	0.00129257	2	E-G	CPSF6 Knock-out
AC008746.12	311.831	-0.214234	0.175571	-1.22022	0.222383	0.405462	2	E-G	CPSF6 Knock-out
VPS37B	1469.51	0.436012	0.111236	3.91972	8.86517e-05	0.000539022	2	E-G	CPSF6 Knock-out
HNRNPCP2	990.906	0.0536167	0.0879541	0.609598	0.542128	0.724652	2	E-G	CPSF6 Knock-out
MAPKAPK5-AS1	1626.65	0.167196	0.0862445	1.93862	0.0525474	0.137127	2	E-G	CPSF6 Knock-out
SLFN12	704.382	0.274278	0.105841	2.59141	0.00955842	0.0336749	2	E-G	CPSF6 Knock-out
ZNF277	2343.01	-0.232361	0.0961323	-2.4171	0.0156448	0.0513463	2	E-G	CPSF6 Knock-out
LINC01543	3.24517	4.27474	3.61963	1.18099	0.237607	0.42464	2	E-G	CPSF6 Knock-out
LAMC3	62.5416	1.15107	0.49352	2.33237	0.0196811	0.0620812	2	E-G	CPSF6 Knock-out
RP11-9H20.2	17.4748	1.00727	0.706861	1.42499	0.15416	0.312721	2	E-G	CPSF6 Knock-out
JCHAIN	44.4738	1.31556	0.373785	3.51955	0.000432273	0.00223971	2	E-G	CPSF6 Knock-out
TMEM187	442.144	-0.155756	0.15908	-0.979099	0.327531	0.529533	2	E-G	CPSF6 Knock-out
CCL3L3	126.289	2.62492	0.273895	9.58368	9.36489e-22	4.60666e-20	2	E-G	CPSF6 Knock-out
EIF4A1P2	10.8806	0.561522	0.507655	1.10611	0.268679	0.462922	2	E-G	CPSF6 Knock-out
RP11-374P20.4	129.342	-0.369765	0.244587	-1.51179	0.130587	0.277075	2	E-G	CPSF6 Knock-out
LAMC1	71.2594	1.93364	0.380632	5.08007	3.77299e-07	3.61704e-06	2	E-G	CPSF6 Knock-out
MIR548AT	5.97277	1.53403	1.14555	1.33911	0.180534	0.350498	2	E-G	CPSF6 Knock-out
DGKH	7960.14	-0.264537	0.0681697	-3.88057	0.000104214	0.000624569	2	E-G	CPSF6 Knock-out
CCDC13	13.3827	0.299434	0.749688	0.399411	0.68959	0.831271	2	E-G	CPSF6 Knock-out
TMEM59	7836.82	0.548631	0.0490516	11.1848	4.84103e-29	4.30107e-27	2	E-G	CPSF6 Knock-out
RP11-34E5.4	17.328	0.955793	0.719039	1.32926	0.183761	0.354946	2	E-G	CPSF6 Knock-out
WNT8B	522.639	0.110076	0.128612	0.855882	0.392063	0.59599	2	E-G	CPSF6 Knock-out
IKZF1	75721.3	0.173923	0.0451883	3.84884	0.000118677	0.000702642	2	E-G	CPSF6 Knock-out
LINC00511	96.4356	0.168355	0.315911	0.53292	0.594089	0.763093	2	E-G	CPSF6 Knock-out
ZNRF3	274.56	0.251493	0.166237	1.51286	0.130314	0.276679	2	E-G	CPSF6 Knock-out
RP11-17A1.3	48.3958	-0.174529	0.447684	-0.389847	0.696649	0.835699	2	E-G	CPSF6 Knock-out
RP11-797J4.1	19.3392	0.0910983	0.474106	0.192147	0.847627	0.925759	2	E-G	CPSF6 Knock-out
ZNF677	572.025	-0.599417	0.129712	-4.62112	3.81667e-06	3.0528e-05	2	E-G	CPSF6 Knock-out
RP1-8B1.4	10.4875	0.167182	0.798097	0.209476	0.834077	0.918844	2	E-G	CPSF6 Knock-out
STAG3L4	678.546	-0.261874	0.118927	-2.20197	0.0276675	0.0817622	2	E-G	CPSF6 Knock-out
PRKRA	5688.41	-0.119498	0.0607629	-1.96662	0.0492269	0.130227	2	E-G	CPSF6 Knock-out
ZSCAN26	1188.8	0.173763	0.0715256	2.42938	0.0151247	0.0499	2	E-G	CPSF6 Knock-out
AL160291.1	4.9097	0.363123	1.00658	0.36075	0.718286	0.849961	2	E-G	CPSF6 Knock-out
RP11-849N15.4	3.12624	-3.83591	2.09457	-1.83136	0.0670467	0.166078	2	E-G	CPSF6 Knock-out
RP11-430L17.1	99.0611	-0.262125	0.247304	-1.05993	0.289178	0.486455	2	E-G	CPSF6 Knock-out
LAPTM4B	4231.21	0.519285	0.0886457	5.85798	4.68526e-09	6.06668e-08	2	E-G	CPSF6 Knock-out
CLTA	6485.87	0.0657459	0.0680651	0.965927	0.334081	0.536786	2	E-G	CPSF6 Knock-out
RP11-304C12.3	4.43142	-0.774666	1.61974	-0.478265	0.632462	0.791228	2	E-G	CPSF6 Knock-out
DEFB108B	8.82969	-0.511279	1.20291	-0.425034	0.670812	0.817653	2	E-G	CPSF6 Knock-out
CACNA1H	201.978	-0.44347	0.202032	-2.19505	0.02816	0.0829545	2	E-G	CPSF6 Knock-out
TMEM106B	5653.12	-0.965244	0.076977	-12.5394	4.5456e-36	6.46573e-34	2	E-G	CPSF6 Knock-out
MPP6	4149.81	-0.310223	0.0604592	-5.1311	2.88046e-07	2.82999e-06	2	E-G	CPSF6 Knock-out
B3GALNT1	121.385	-0.242676	0.326935	-0.742275	0.457921	0.655358	2	E-G	CPSF6 Knock-out
[truncated: 128,350 more rows]

## Sheet: Figure 5
Gene Name	baseMean	log2FoldChange	lfcSE	stat	pvalue	padj	Figure	Donor	Condition
EFCAB8	62.8835	1.62128	0.519234	3.12244	0.00179358	0.0125529	5	X-Z	CPSF6 Knock-out
RP11-550F7.1	1287.48	0.103698	0.106514	0.973564	0.330273	0.598634	5	X-Z	CPSF6 Knock-out
USP31	1337.4	0.533213	0.114827	4.64362	3.42353e-06	5.47342e-05	5	X-Z	CPSF6 Knock-out
MCM6	64889.8	0.0596661	0.0323992	1.84159	0.0655347	0.213163	5	X-Z	CPSF6 Knock-out
SNORA14B	13.0186	1.77767	1.00889	1.76201	0.0780681	NA	5	X-Z	CPSF6 Knock-out
MRPL23	2532.27	0.111533	0.0796073	1.40104	0.161202	0.3902	5	X-Z	CPSF6 Knock-out
PTPRU	567.664	0.654857	0.161516	4.05444	5.02552e-05	0.000590924	5	X-Z	CPSF6 Knock-out
RP11-6N17.4	122.092	0.52378	0.338249	1.5485	0.121501	0.325267	5	X-Z	CPSF6 Knock-out
MIR6835	18.4408	0.28241	0.828048	0.341055	0.733062	0.881335	5	X-Z	CPSF6 Knock-out
CD3D	13979.1	0.048411	0.0461028	1.05007	0.293687	0.561448	5	X-Z	CPSF6 Knock-out
RP11-499E18.1	25.8756	-0.570162	0.881387	-0.646892	0.517702	0.755379	5	X-Z	CPSF6 Knock-out
DGUOK-AS1	174.367	-0.0163582	0.280639	-0.058289	0.953518	0.981823	5	X-Z	CPSF6 Knock-out
WAS	15117.1	0.0818683	0.0432105	1.89464	0.0581404	0.195054	5	X-Z	CPSF6 Knock-out
FAM103A2P	189.927	-0.229051	0.267455	-0.856406	0.391773	0.656271	5	X-Z	CPSF6 Knock-out
ANAPC16	11527.8	-0.115001	0.0468304	-2.45569	0.0140615	0.0672936	5	X-Z	CPSF6 Knock-out
LEMD1	33.4395	0.689949	0.677102	1.01897	0.308215	0.576339	5	X-Z	CPSF6 Knock-out
RHPN1-AS1	50.6981	0.192132	0.549609	0.349579	0.726655	0.878252	5	X-Z	CPSF6 Knock-out
KLHL7	2220.13	-0.0775312	0.0906994	-0.854816	0.392653	0.657038	5	X-Z	CPSF6 Knock-out
PCF11	11610.5	-0.207215	0.0442547	-4.68234	2.83621e-06	4.64139e-05	5	X-Z	CPSF6 Knock-out
NOTCH2	28280.5	0.215505	0.0378881	5.68792	1.28593e-08	3.45494e-07	5	X-Z	CPSF6 Knock-out
MECR	1716.86	-0.228521	0.108078	-2.11441	0.03448	0.13305	5	X-Z	CPSF6 Knock-out
TREML2	1711.38	-0.121016	0.103416	-1.17018	0.241927	0.500637	5	X-Z	CPSF6 Knock-out
RP11-345P4.9	273.359	0.0859689	0.241738	0.355628	0.722119	0.875931	5	X-Z	CPSF6 Knock-out
RP11-134O21.1	29.8637	-0.712678	0.709505	-1.00447	0.315151	0.583145	5	X-Z	CPSF6 Knock-out
PRKCDBP	1253.35	0.802209	0.127546	6.28958	3.18336e-10	1.14301e-08	5	X-Z	CPSF6 Knock-out
CD180	423.063	0.444792	0.181455	2.45125	0.0142361	0.0679615	5	X-Z	CPSF6 Knock-out
HDAC10	2837.71	-0.105252	0.0829921	-1.26821	0.204721	0.452382	5	X-Z	CPSF6 Knock-out
CYB5D1	2262.35	0.00471349	0.0989476	0.0476362	0.962006	0.984821	5	X-Z	CPSF6 Knock-out
TUBG1P	61.0601	-0.744018	0.480863	-1.54726	0.121801	0.325665	5	X-Z	CPSF6 Knock-out
FBXL19-AS1	956.36	0.384786	0.12385	3.10687	0.00189081	0.0131035	5	X-Z	CPSF6 Knock-out
CICP16	67.7203	-1.99149	0.562219	-3.5422	0.000396799	0.00352069	5	X-Z	CPSF6 Knock-out
CD200R1	739.554	-0.182488	0.16237	-1.1239	0.261055	0.524869	5	X-Z	CPSF6 Knock-out
PRSS53	1112.52	-0.718063	0.116757	-6.15005	7.74579e-10	2.59417e-08	5	X-Z	CPSF6 Knock-out
RP11-427J23.1	59.4139	-0.644157	0.589924	-1.09193	0.274863	0.54086	5	X-Z	CPSF6 Knock-out
BACE1	615.916	-1.48841	0.167663	-8.87738	6.84557e-19	6.68217e-17	5	X-Z	CPSF6 Knock-out
FAM8A1	998.909	-0.266649	0.131865	-2.02214	0.0431615	0.15733	5	X-Z	CPSF6 Knock-out
LARS2	5109.62	0.0153139	0.0649066	0.235938	0.813481	0.922997	5	X-Z	CPSF6 Knock-out
RP1-92O14.3	49.1134	0.0861223	0.525746	0.16381	0.869881	0.948824	5	X-Z	CPSF6 Knock-out
RUSC1	2748.86	-0.215516	0.0766777	-2.81067	0.00494386	0.0292856	5	X-Z	CPSF6 Knock-out
NAPA-AS1	510.194	-0.0757044	0.195396	-0.387442	0.698429	0.865049	5	X-Z	CPSF6 Knock-out
ARHGAP32	2457	0.361234	0.079653	4.5351	5.75763e-06	8.64311e-05	5	X-Z	CPSF6 Knock-out
CTD-2023M8.1	9.82804	-2.55686	1.34503	-1.90097	0.0573055	NA	5	X-Z	CPSF6 Knock-out
TRAV35	170.978	-0.0774695	0.318087	-0.243548	0.807581	0.919732	5	X-Z	CPSF6 Knock-out
AMDHD2	2742.42	-0.0338849	0.0770884	-0.439558	0.660257	0.846847	5	X-Z	CPSF6 Knock-out
NOMO3	5042.65	-0.015881	0.0667068	-0.238072	0.811825	0.922205	5	X-Z	CPSF6 Knock-out
CLEC17A	62.5164	0.0793965	0.45873	0.173079	0.86259	0.945107	5	X-Z	CPSF6 Knock-out
DENND5B-AS1	596.66	0.34503	0.151917	2.27117	0.0231368	0.0983856	5	X-Z	CPSF6 Knock-out
WHSC1L1	26549.3	-0.0468808	0.0370277	-1.2661	0.205477	0.45331	5	X-Z	CPSF6 Knock-out
RNF139	2521.48	-0.0322334	0.100172	-0.321781	0.747619	0.889259	5	X-Z	CPSF6 Knock-out
GSK3B	5604.18	-0.0487819	0.0575918	-0.847028	0.396979	0.661632	5	X-Z	CPSF6 Knock-out
RAB38	1111.87	-0.048654	0.153043	-0.31791	0.750553	0.891197	5	X-Z	CPSF6 Knock-out
RP11-192M23.1	20.1395	0.636521	0.920424	0.691552	0.489219	0.736063	5	X-Z	CPSF6 Knock-out
TBC1D7	871.47	0.037493	0.127713	0.293572	0.769085	0.900387	5	X-Z	CPSF6 Knock-out
LINC00271	65.1771	-0.00417539	0.484963	-0.00860972	0.993131	0.997945	5	X-Z	CPSF6 Knock-out
ADGRE4P	138.032	0.333459	0.34064	0.97892	0.327619	0.596719	5	X-Z	CPSF6 Knock-out
GABARAPL1	826.455	0.168992	0.136808	1.23525	0.216739	0.468577	5	X-Z	CPSF6 Knock-out
RYR2	67.6263	-0.198994	0.482406	-0.412503	0.67997	0.856133	5	X-Z	CPSF6 Knock-out
DCAF12	6541.59	-0.0869362	0.0560408	-1.5513	0.12083	0.324322	5	X-Z	CPSF6 Knock-out
MALSU1	1500.92	-0.0450794	0.099295	-0.453994	0.649833	0.840066	5	X-Z	CPSF6 Knock-out
PRPF18	3000.88	0.263817	0.0819853	3.21786	0.00129151	0.00957538	5	X-Z	CPSF6 Knock-out
RP11-327F22.6	31.8049	0.658435	0.672437	0.979177	0.327492	0.596655	5	X-Z	CPSF6 Knock-out
RP11-783K16.13	45.9725	-0.285321	0.55118	-0.517655	0.604699	0.812441	5	X-Z	CPSF6 Knock-out
ENDOV	851.503	0.232545	0.131527	1.76803	0.0770555	0.238344	5	X-Z	CPSF6 Knock-out
ZNF584	1103.6	0.0385782	0.120446	0.320296	0.748744	0.890218	5	X-Z	CPSF6 Knock-out
MAGIX	170.977	0.0998284	0.319154	0.312791	0.75444	0.893379	5	X-Z	CPSF6 Knock-out
UPK1A-AS1	690.833	0.238299	0.143463	1.66105	0.0967027	0.280115	5	X-Z	CPSF6 Knock-out
TNRC6C	3586.81	-0.157037	0.0684899	-2.29285	0.0218564	0.0939917	5	X-Z	CPSF6 Knock-out
SLC16A5	773.055	0.101777	0.140915	0.722255	0.470138	0.720848	5	X-Z	CPSF6 Knock-out
ATG7	3540.96	-0.0248607	0.0680439	-0.365362	0.714841	0.872761	5	X-Z	CPSF6 Knock-out
RP11-553L6.5	70.9095	0.901152	0.436929	2.06247	0.0391632	0.146607	5	X-Z	CPSF6 Knock-out
ADAMTS14	104.476	0.33025	0.383196	0.86183	0.388781	0.65322	5	X-Z	CPSF6 Knock-out
RN7SKP70	29.6647	-0.304355	0.712311	-0.427278	0.669177	0.850483	5	X-Z	CPSF6 Knock-out
ZSWIM3	830.583	-0.21369	0.146309	-1.46054	0.144142	0.362947	5	X-Z	CPSF6 Knock-out
TJAP1	4102.5	-0.0142013	0.0695727	-0.204122	0.838258	0.934083	5	X-Z	CPSF6 Knock-out
CTD-3113P16.11	139.873	-1.44841	0.318451	-4.54829	5.40845e-06	8.20133e-05	5	X-Z	CPSF6 Knock-out
RP11-526I2.5	474.24	-0.967319	0.176497	-5.48065	4.23767e-08	1.01906e-06	5	X-Z	CPSF6 Knock-out
DNALI1	28.8592	0.442056	0.715088	0.618184	0.536454	0.768879	5	X-Z	CPSF6 Knock-out
STX18	2249.79	0.128076	0.0907265	1.41167	0.158047	0.3853	5	X-Z	CPSF6 Knock-out
AGAP6	1435.28	0.141223	0.128624	1.09795	0.272225	0.537474	5	X-Z	CPSF6 Knock-out
ZRANB2-AS1	17.9695	1.11296	0.96948	1.14799	0.250971	0.512684	5	X-Z	CPSF6 Knock-out
RP5-1139B12.4	45.7184	-0.557577	0.546161	-1.0209	0.307301	0.575578	5	X-Z	CPSF6 Knock-out
LONP2	10851.9	0.105423	0.0453067	2.32688	0.0199719	0.0879075	5	X-Z	CPSF6 Knock-out
PLAU	166.549	-0.673835	0.298741	-2.25558	0.0240968	0.101404	5	X-Z	CPSF6 Knock-out
ZNF662	92.7647	-0.271977	0.433054	-0.628044	0.529975	0.764557	5	X-Z	CPSF6 Knock-out
AC015971.2	48.7923	0.0814161	0.597933	0.136163	0.891693	0.956923	5	X-Z	CPSF6 Knock-out
TMEM265	21.415	-1.40214	0.801533	-1.74933	0.0802348	0.24552	5	X-Z	CPSF6 Knock-out
SSC5D	46.1789	-0.203726	0.562436	-0.362221	0.717187	0.873742	5	X-Z	CPSF6 Knock-out
CCNL2	8883.5	0.0408659	0.0525418	0.777779	0.4367	0.694277	5	X-Z	CPSF6 Knock-out
RP4-671O14.6	168.977	0.0658711	0.294755	0.223477	0.823164	0.927211	5	X-Z	CPSF6 Knock-out
RAPGEF5	79.7013	0.12114	0.518702	0.233545	0.815339	0.923743	5	X-Z	CPSF6 Knock-out
MAP1B	375.894	-0.0691152	0.193042	-0.358032	0.720319	0.874786	5	X-Z	CPSF6 Knock-out
TMEM243	3708.56	-0.0505186	0.0696912	-0.724892	0.468518	0.719786	5	X-Z	CPSF6 Knock-out
ZNF595	325.655	-0.0592127	0.2187	-0.270749	0.786584	0.909705	5	X-Z	CPSF6 Knock-out
SHC1	6549.37	-0.149297	0.0544796	-2.74043	0.00613597	0.0347192	5	X-Z	CPSF6 Knock-out
RP11-872D17.8	199.617	0.116218	0.392799	0.295872	0.767328	0.899637	5	X-Z	CPSF6 Knock-out
SAMD4A	514.812	-0.131431	0.165817	-0.792624	0.427997	0.686502	5	X-Z	CPSF6 Knock-out
HILPDA	40337.7	0.00339579	0.0398878	0.0851337	0.932155	0.974391	5	X-Z	CPSF6 Knock-out
RP11-109L13.1	484.764	-0.107996	0.199753	-0.54065	0.588749	0.80177	5	X-Z	CPSF6 Knock-out
BHLHE40	105799	0.0819711	0.030692	2.67076	0.00756789	0.0410059	5	X-Z	CPSF6 Knock-out
PFN1P2	177.488	-0.526255	0.291537	-1.8051	0.0710585	0.225762	5	X-Z	CPSF6 Knock-out
GSR	6362.1	-0.210074	0.0607109	-3.46024	0.000539697	0.00459807	5	X-Z	CPSF6 Knock-out
RP1-283E3.8	999.587	2.18201	2.35743	0.925585	0.354661	0.621689	5	X-Z	CPSF6 Knock-out
ARL2-SNX15	63.6942	4.32524	1.53393	2.81971	0.00480677	0.0286328	5	X-Z	CPSF6 Knock-out
RP11-734I18.1	21.0879	1.65132	0.948726	1.74056	0.0817606	0.2487	5	X-Z	CPSF6 Knock-out
CRY1	3141.73	0.220751	0.0733474	3.00967	0.00261534	0.0172097	5	X-Z	CPSF6 Knock-out
NINL	1351.68	-0.0432388	0.115889	-0.373104	0.709071	0.870486	5	X-Z	CPSF6 Knock-out
OPN3	2620.44	0.70621	0.0870171	8.11576	4.8276e-16	3.57924e-14	5	X-Z	CPSF6 Knock-out
RP4-785G19.2	14.0628	-0.330355	0.987955	-0.334382	0.738091	NA	5	X-Z	CPSF6 Knock-out
RBM4B	2010.59	0.213232	0.088243	2.41642	0.0156738	0.0729955	5	X-Z	CPSF6 Knock-out
CEP89	2810.74	0.125136	0.0793237	1.57754	0.114672	0.31382	5	X-Z	CPSF6 Knock-out
TNIP3	822.756	0.466374	0.142133	3.28125	0.00103348	0.00794133	5	X-Z	CPSF6 Knock-out
TXNIP	7345.39	-0.0339464	0.0548102	-0.619345	0.535689	0.768785	5	X-Z	CPSF6 Knock-out
SOAT1	6371.15	0.00477116	0.0580097	0.0822476	0.93445	0.975268	5	X-Z	CPSF6 Knock-out
RP11-47A8.5	59.1737	-0.432879	0.47754	-0.906478	0.364683	0.630864	5	X-Z	CPSF6 Knock-out
TTYH2	345.667	-0.0245186	0.204663	-0.1198	0.904642	0.962516	5	X-Z	CPSF6 Knock-out
MSN	135812	0.0787962	0.0299656	2.62956	0.00854963	0.0454631	5	X-Z	CPSF6 Knock-out
CTSW	1434.59	0.342262	0.102114	3.35178	0.000802937	0.0064001	5	X-Z	CPSF6 Knock-out
INTS4	6202.34	0.148943	0.0564995	2.63618	0.00838446	0.0447317	5	X-Z	CPSF6 Knock-out
RN7SL262P	18.3218	-0.711904	0.848357	-0.839156	0.401382	0.665999	5	X-Z	CPSF6 Knock-out
SF3B1	54648	-0.0664736	0.0341003	-1.94935	0.0512533	0.178039	5	X-Z	CPSF6 Knock-out
PIGQ	2093.31	0.0426949	0.0958662	0.445359	0.65606	0.843748	5	X-Z	CPSF6 Knock-out
RPS6	215229	-0.0655508	0.0399246	-1.64186	0.100618	0.28736	5	X-Z	CPSF6 Knock-out
DLEU2L	88.6417	-0.242054	0.394207	-0.614027	0.539197	0.770744	5	X-Z	CPSF6 Knock-out
GS1-124K5.10	19.4504	-0.0601586	0.83365	-0.0721629	0.942472	0.978123	5	X-Z	CPSF6 Knock-out
RP13-93L13.2	40.7884	-0.112284	0.586481	-0.191453	0.84817	0.938787	5	X-Z	CPSF6 Knock-out
RP11-839D17.3	32.098	0.115342	0.642849	0.179424	0.857605	0.943103	5	X-Z	CPSF6 Knock-out
CACNA2D4	344.122	-0.248657	0.201431	-1.23446	0.217033	0.468987	5	X-Z	CPSF6 Knock-out
SEC22B	8178.9	0.199902	0.0556953	3.5892	0.0003317	0.00302075	5	X-Z	CPSF6 Knock-out
RP11-700P18.1	352.803	0.0808423	0.197634	0.40905	0.682503	0.857045	5	X-Z	CPSF6 Knock-out
RP5-1061H20.4	16.355	1.50335	1.12948	1.33101	0.183187	0.423468	5	X-Z	CPSF6 Knock-out
H2AFZ	54265	-0.00915374	0.0390762	-0.234254	0.814788	0.923357	5	X-Z	CPSF6 Knock-out
APBA1	18.0454	-0.567801	0.887807	-0.639554	0.522463	0.75917	5	X-Z	CPSF6 Knock-out
PYM1	2911.84	-0.0815563	0.0956711	-0.852466	0.393956	0.658514	5	X-Z	CPSF6 Knock-out
SMIM12	4132.13	0.132334	0.0691011	1.91509	0.0554816	0.188778	5	X-Z	CPSF6 Knock-out
FBXL17	1658.79	0.196066	0.1089	1.80043	0.0717927	0.227203	5	X-Z	CPSF6 Knock-out
CHD7	14227.8	0.0916886	0.0467486	1.96131	0.0498427	0.174387	5	X-Z	CPSF6 Knock-out
HSPA12B	11.793	-3.60987	1.57895	-2.28625	0.0222395	NA	5	X-Z	CPSF6 Knock-out
GNG10	1981.02	-0.630952	0.0901446	-6.99933	2.57181e-12	1.27118e-10	5	X-Z	CPSF6 Knock-out
DOCK1	69.8686	-0.787335	0.462749	-1.70143	0.0888622	0.263882	5	X-Z	CPSF6 Knock-out
TYW3	3702.85	-0.316028	0.0701572	-4.50457	6.65082e-06	9.80959e-05	5	X-Z	CPSF6 Knock-out
TSGA10	384.838	0.541283	0.206139	2.62582	0.00864407	0.0458523	5	X-Z	CPSF6 Knock-out
FLYWCH1	5577.03	0.13064	0.0605164	2.15875	0.0308697	0.122853	5	X-Z	CPSF6 Knock-out
DNAJC5	13833.9	-0.118061	0.0436526	-2.70455	0.00683971	0.0379894	5	X-Z	CPSF6 Knock-out
MUC3A	13.8366	1.33901	1.26592	1.05773	0.290177	NA	5	X-Z	CPSF6 Knock-out
RNF214	3023.5	0.190407	0.0728946	2.61208	0.00899931	0.0473103	5	X-Z	CPSF6 Knock-out
AC108488.4	93.5485	-0.19843	0.40399	-0.491175	0.623302	0.823895	5	X-Z	CPSF6 Knock-out
ANKRD36	3769.24	0.150711	0.0675374	2.23153	0.0256463	0.106434	5	X-Z	CPSF6 Knock-out
PKIG	473.476	0.073386	0.174804	0.41982	0.674617	0.852732	5	X-Z	CPSF6 Knock-out
DDX56	9198.96	-0.0131352	0.0535638	-0.245225	0.806282	0.91913	5	X-Z	CPSF6 Knock-out
LRWD1	1794.33	0.248952	0.0910806	2.73332	0.00626998	0.0353232	5	X-Z	CPSF6 Knock-out
AP3B1	12001	0.132795	0.0467817	2.83862	0.00453098	0.0272743	5	X-Z	CPSF6 Knock-out
C9orf85	1177.18	-0.16596	0.11191	-1.48298	0.138079	0.353013	5	X-Z	CPSF6 Knock-out
ZXDB	1983.7	-0.190673	0.103712	-1.83847	0.0659926	0.214258	5	X-Z	CPSF6 Knock-out
PLCG2	3096.12	-0.128683	0.0947625	-1.35795	0.174478	0.409824	5	X-Z	CPSF6 Knock-out
PRKCH	22664.1	0.0263041	0.038325	0.686342	0.492497	0.738184	5	X-Z	CPSF6 Knock-out
DCTN2	12017.5	0.0224648	0.0442184	0.508042	0.611424	0.816394	5	X-Z	CPSF6 Knock-out
NFIC	3579.57	-0.0501934	0.0688	-0.729555	0.465662	0.717603	5	X-Z	CPSF6 Knock-out
RCC2	21623.4	-0.0206826	0.0397416	-0.520427	0.602766	0.811228	5	X-Z	CPSF6 Knock-out
CTB-25B13.12	304.4	0.0133583	0.229144	0.0582964	0.953513	0.981823	5	X-Z	CPSF6 Knock-out
OSER1	3465.98	-0.0542438	0.0688737	-0.787583	0.43094	0.689458	5	X-Z	CPSF6 Knock-out
ASNS	7277.62	-0.0110404	0.0594484	-0.185714	0.852669	0.941204	5	X-Z	CPSF6 Knock-out
PEX1	2948.8	0.0153446	0.0729579	0.210321	0.833417	0.931426	5	X-Z	CPSF6 Knock-out
BBS7	2097.64	-0.00370516	0.0927257	-0.0399583	0.968126	0.987532	5	X-Z	CPSF6 Knock-out
PTK7	1311.74	0.125911	0.11283	1.11594	0.264449	0.528327	5	X-Z	CPSF6 Knock-out
CXorf56	2006.4	0.0846702	0.0897535	0.943363	0.345495	0.61378	5	X-Z	CPSF6 Knock-out
RP11-331F9.3	20.7575	0.600565	0.794516	0.755887	0.449717	0.704942	5	X-Z	CPSF6 Knock-out
RP11-180M15.3	30.582	-0.161869	0.67413	-0.240115	0.810241	0.921376	5	X-Z	CPSF6 Knock-out
TMEM234	585.412	0.482426	0.15717	3.06946	0.00214445	0.014565	5	X-Z	CPSF6 Knock-out
RP11-848P1.2	24.2028	-0.279742	0.799733	-0.349794	0.726493	0.87824	5	X-Z	CPSF6 Knock-out
SIDT2	2749	0.0114625	0.0754004	0.152022	0.879169	0.952669	5	X-Z	CPSF6 Knock-out
CCT6P1	605.512	-0.2792	0.151009	-1.8489	0.0644725	0.210413	5	X-Z	CPSF6 Knock-out
CCDC58	3211.61	-0.0250987	0.0707151	-0.354927	0.722644	0.876045	5	X-Z	CPSF6 Knock-out
BAIAP2L2	33.0218	-1.40648	0.674125	-2.08639	0.0369437	0.140217	5	X-Z	CPSF6 Knock-out
CNIH3	50.442	0.0842253	0.560607	0.150239	0.880576	0.953298	5	X-Z	CPSF6 Knock-out
RP11-705O1.8	25.5679	-0.417108	0.718869	-0.580228	0.561761	0.785593	5	X-Z	CPSF6 Knock-out
RPS4XP1	12.7908	0.70294	1.04866	0.670325	0.502651	NA	5	X-Z	CPSF6 Knock-out
RP1-20N2.8	45.6784	0.2069	0.550017	0.37617	0.706791	0.869452	5	X-Z	CPSF6 Knock-out
RP5-967N21.11	77.4779	-0.686322	0.446407	-1.53743	0.124187	0.33014	5	X-Z	CPSF6 Knock-out
RNF43	1105	0.326186	0.12884	2.53171	0.0113509	0.0570187	5	X-Z	CPSF6 Knock-out
AASDHPPT	4008.19	-0.3707	0.0872555	-4.24844	2.15263e-05	0.000279205	5	X-Z	CPSF6 Knock-out
RP5-1074L1.4	563.99	0.424005	0.174825	2.42532	0.015295	0.0716782	5	X-Z	CPSF6 Knock-out
RP4-622L5.7	17.4095	0.573617	0.867381	0.661321	0.508407	0.749836	5	X-Z	CPSF6 Knock-out
PLEKHA3P1	26.4411	0.913772	0.715812	1.27655	0.20176	0.44883	5	X-Z	CPSF6 Knock-out
RP11-47I22.2	25.0534	-0.0629548	0.779304	-0.0807833	0.935614	0.975601	5	X-Z	CPSF6 Knock-out
LINC01554	5.7424	-3.12067	1.92541	-1.62078	0.105064	NA	5	X-Z	CPSF6 Knock-out
IL21	3454.49	1.31472	0.108947	12.0675	1.56741e-33	4.75734e-31	5	X-Z	CPSF6 Knock-out
RNF181	4887.41	0.0375153	0.0594016	0.631554	0.527678	0.763036	5	X-Z	CPSF6 Knock-out
WWOX	981.908	0.140352	0.131551	1.06691	0.286013	0.552787	5	X-Z	CPSF6 Knock-out
HSFX2	9.92075	0.134813	1.16562	0.115657	0.907924	NA	5	X-Z	CPSF6 Knock-out
RP11-815J21.4	8.82486	-0.176055	1.20339	-0.146299	0.883685	NA	5	X-Z	CPSF6 Knock-out
HSPD1P6	11.6961	0.444271	1.04393	0.425574	0.670418	NA	5	X-Z	CPSF6 Knock-out
RAB40AL	8.96928	-1.19437	1.48529	-0.804129	0.421323	NA	5	X-Z	CPSF6 Knock-out
ASAP1	7061.64	0.19032	0.052105	3.65263	0.000259568	0.0024401	5	X-Z	CPSF6 Knock-out
PVRL4	33.51	0.109737	0.688813	0.159313	0.873422	0.95001	5	X-Z	CPSF6 Knock-out
RIOK1	5008.63	0.00115542	0.0677443	0.0170555	0.986392	0.995736	5	X-Z	CPSF6 Knock-out
CD82	26607.6	0.495083	0.0416555	11.8852	1.4137e-32	4.03841e-30	5	X-Z	CPSF6 Knock-out
RP11-456K23.1	35.4659	-0.113983	0.643689	-0.177078	0.859448	0.943969	5	X-Z	CPSF6 Knock-out
ENPP2	1147.23	0.0569034	0.117584	0.483937	0.628431	0.826601	5	X-Z	CPSF6 Knock-out
NHLH1	52.6845	1.14157	0.536041	2.12963	0.033202	0.129352	5	X-Z	CPSF6 Knock-out
SUPT20H	6848.54	0.0639048	0.0537891	1.18806	0.234809	0.492726	5	X-Z	CPSF6 Knock-out
LLNLR-304A6.2	18.4	0.92126	0.88198	1.04454	0.296237	0.564118	5	X-Z	CPSF6 Knock-out
LDHD	52.7739	0.76255	0.509988	1.49523	0.134854	0.347696	5	X-Z	CPSF6 Knock-out
STX19	16.4584	-0.375163	1.10664	-0.339012	0.734601	0.881984	5	X-Z	CPSF6 Knock-out
CARNMT1	3177.94	-0.0954122	0.0732884	-1.30187	0.19296	0.436859	5	X-Z	CPSF6 Knock-out
SLC30A1	243.6	-0.319705	0.236753	-1.35037	0.176897	0.413505	5	X-Z	CPSF6 Knock-out
MOAP1	3133.91	0.00853811	0.0761438	0.112131	0.910719	0.965334	5	X-Z	CPSF6 Knock-out
MIR3615	55.7376	1.19383	0.588411	2.0289	0.0424684	0.155563	5	X-Z	CPSF6 Knock-out
VPS18	1569.31	0.231896	0.109387	2.11995	0.0340101	0.131708	5	X-Z	CPSF6 Knock-out
VAMP1	5704.98	0.460145	0.0623189	7.38371	1.53934e-13	8.61719e-12	5	X-Z	CPSF6 Knock-out
TUSC3	19.3164	-0.349225	0.828299	-0.421617	0.673304	0.851694	5	X-Z	CPSF6 Knock-out
CBR3-AS1	183.246	0.128396	0.281966	0.455359	0.648851	0.839844	5	X-Z	CPSF6 Knock-out
COL6A1	255.9	1.00015	0.238055	4.20135	2.65325e-05	0.000335324	5	X-Z	CPSF6 Knock-out
RP11-517I3.1	9.73342	-0.896225	1.15436	-0.776381	0.437524	NA	5	X-Z	CPSF6 Knock-out
RP11-158H5.8	16.0708	-0.384369	1.05936	-0.362831	0.716731	0.873567	5	X-Z	CPSF6 Knock-out
CDKL5	201.698	0.217713	0.263858	0.825116	0.409306	0.671853	5	X-Z	CPSF6 Knock-out
RP11-158I9.5	44.4879	1.08377	0.568896	1.90503	0.0567756	0.191803	5	X-Z	CPSF6 Knock-out
BBS10	451.028	-0.881786	0.175478	-5.02504	5.03316e-07	9.76715e-06	5	X-Z	CPSF6 Knock-out
ABHD5	1067.39	0.461778	0.120889	3.81983	0.000133541	0.00137396	5	X-Z	CPSF6 Knock-out
WARS2	2084.15	-0.140619	0.0911781	-1.54225	0.123013	0.327961	5	X-Z	CPSF6 Knock-out
MAGT1	7526.68	-0.384364	0.0667996	-5.75398	8.7167e-09	2.42234e-07	5	X-Z	CPSF6 Knock-out
BPNT1	4254.39	-0.066752	0.0652012	-1.02379	0.305937	0.574241	5	X-Z	CPSF6 Knock-out
C1orf54	114.577	0.416167	0.341705	1.21791	0.223257	0.477985	5	X-Z	CPSF6 Knock-out
ATP5HP4	30.1332	-0.883616	0.859089	-1.02855	0.303692	0.571629	5	X-Z	CPSF6 Knock-out
SHQ1	4381.12	0.114947	0.0707753	1.62411	0.104353	0.294589	5	X-Z	CPSF6 Knock-out
RPP25L	1449.18	0.178871	0.100509	1.77966	0.075132	0.234486	5	X-Z	CPSF6 Knock-out
NAB1	6802.33	0.327077	0.0597812	5.47124	4.4691e-08	1.07027e-06	5	X-Z	CPSF6 Knock-out
RCAN2	602.354	0.290142	0.161855	1.7926	0.0730364	0.229887	5	X-Z	CPSF6 Knock-out
SLC17A2	31.8662	1.0604	0.69952	1.5159	0.129544	0.338999	5	X-Z	CPSF6 Knock-out
TBPL1	1600.62	-0.131874	0.0965021	-1.36654	0.171769	0.405964	5	X-Z	CPSF6 Knock-out
MIPEP	1303.42	0.042386	0.113254	0.374256	0.708214	0.870088	5	X-Z	CPSF6 Knock-out
PLEKHM1P1	1509.52	-0.374513	0.0993095	-3.77117	0.000162486	0.0016236	5	X-Z	CPSF6 Knock-out
CTA-228A9.3	96.023	-0.0747321	0.381399	-0.195942	0.844655	0.937413	5	X-Z	CPSF6 Knock-out
ZNF691	984.68	0.193825	0.14637	1.32421	0.185433	0.426882	5	X-Z	CPSF6 Knock-out
ZSWIM8-AS1	141.499	0.54942	0.495384	1.10908	0.267396	0.531807	5	X-Z	CPSF6 Knock-out
KCNE2	14.497	-4.32571	1.46494	-2.95282	0.00314882	NA	5	X-Z	CPSF6 Knock-out
CREB3	4306.38	0.190358	0.064247	2.96291	0.00304746	0.0195887	5	X-Z	CPSF6 Knock-out
HTATSF1	17740.4	0.130513	0.0499395	2.61343	0.00896393	0.0471626	5	X-Z	CPSF6 Knock-out
CEP131	2097.17	0.115171	0.0979542	1.17577	0.239689	0.498016	5	X-Z	CPSF6 Knock-out
MDM2	19321.4	-0.0434176	0.0459906	-0.944052	0.345143	0.613451	5	X-Z	CPSF6 Knock-out
CTD-2116N17.1	146.135	1.11287	0.39738	2.80053	0.00510192	0.03005	5	X-Z	CPSF6 Knock-out
SNRPB2	9641.56	-0.12737	0.0473223	-2.69155	0.00711207	0.0391105	5	X-Z	CPSF6 Knock-out
CASP16P	12.421	4.46402	1.44115	3.09753	0.00195143	NA	5	X-Z	CPSF6 Knock-out
PPP1R3B	8743.54	-0.139188	0.0483217	-2.88045	0.00397105	0.0244881	5	X-Z	CPSF6 Knock-out
ZNF19	108.327	0.533471	0.433149	1.23161	0.218095	0.470512	5	X-Z	CPSF6 Knock-out
TBC1D13	3678.88	0.0258597	0.0676593	0.382205	0.702309	0.867503	5	X-Z	CPSF6 Knock-out
RP11-504P24.5	8.25637	0.948197	1.23455	0.768051	0.442457	NA	5	X-Z	CPSF6 Knock-out
UBXN4	22511.7	-0.171305	0.0378617	-4.52451	6.0535e-06	9.01758e-05	5	X-Z	CPSF6 Knock-out
PPP1R35	1594.44	0.179854	0.099301	1.8112	0.0701107	0.223445	5	X-Z	CPSF6 Knock-out
GTPBP8	2447.4	0.0292888	0.0809594	0.361771	0.717523	0.873978	5	X-Z	CPSF6 Knock-out
PNMA6B	31.9166	0.0524378	0.649206	0.0807722	0.935623	0.975601	5	X-Z	CPSF6 Knock-out
EIF3LP2	134.486	-0.48232	0.326462	-1.47742	0.139564	0.355451	5	X-Z	CPSF6 Knock-out
RP11-395I6.3	80.1869	-0.0695082	0.414725	-0.167601	0.866897	0.946889	5	X-Z	CPSF6 Knock-out
RP11-108M9.4	35.3825	0.342627	0.642481	0.533287	0.593835	0.805533	5	X-Z	CPSF6 Knock-out
RP11-81H14.2	101.094	1.56972	0.379642	4.13474	3.55359e-05	0.000434688	5	X-Z	CPSF6 Knock-out
LPAR6	2098.2	-0.0670181	0.0932734	-0.718512	0.472442	0.723183	5	X-Z	CPSF6 Knock-out
SPIN1	4076.12	-0.210509	0.0719289	-2.92662	0.00342664	0.0216816	5	X-Z	CPSF6 Knock-out
PERM1	209.351	0.0608035	0.257617	0.236022	0.813415	0.922987	5	X-Z	CPSF6 Knock-out
RP11-627K11.6	1993.78	-1.17449	0.994409	-1.18109	0.237566	0.495723	5	X-Z	CPSF6 Knock-out
CTD-2184D3.7	9.64965	0.0824982	1.63561	0.0504388	0.959773	NA	5	X-Z	CPSF6 Knock-out
THOC3	9289.14	-0.0131753	0.0478436	-0.275383	0.783022	0.907817	5	X-Z	CPSF6 Knock-out
WDTC1	7980.32	0.203305	0.0547333	3.71446	0.000203637	0.00197881	5	X-Z	CPSF6 Knock-out
DNHD1	4876.55	-0.235925	0.0634466	-3.71848	0.000200428	0.00195056	5	X-Z	CPSF6 Knock-out
ITPKA	486.998	0.26172	0.194339	1.34672	0.178071	0.415498	5	X-Z	CPSF6 Knock-out
FAM63A	3741.42	0.0725978	0.0676891	1.07252	0.283488	0.549795	5	X-Z	CPSF6 Knock-out
ADRBK2	13985.1	0.187109	0.0511801	3.65588	0.000256297	0.00241444	5	X-Z	CPSF6 Knock-out
FKBP9	146.507	-0.397148	0.310776	-1.27793	0.201275	0.448111	5	X-Z	CPSF6 Knock-out
FRG1	4324.23	-0.00334212	0.0686355	-0.0486937	0.961163	0.984339	5	X-Z	CPSF6 Knock-out
MSH3	5261.41	-0.0216672	0.0580992	-0.372934	0.709198	0.870524	5	X-Z	CPSF6 Knock-out
ATXN2L	32078.6	-0.0158337	0.0406862	-0.389166	0.697153	0.864758	5	X-Z	CPSF6 Knock-out
RAB11FIP3	3160.93	-0.0355048	0.0764099	-0.464663	0.642173	0.835849	5	X-Z	CPSF6 Knock-out
ACSS2	7119.37	0.0159893	0.0517036	0.309249	0.757132	0.895367	5	X-Z	CPSF6 Knock-out
PLEKHG3	286.531	0.0594619	0.262687	0.22636	0.820921	0.925973	5	X-Z	CPSF6 Knock-out
TBCA	8187.9	-0.0335654	0.0609194	-0.550981	0.581647	0.797007	5	X-Z	CPSF6 Knock-out
WDR90	5502.68	0.0365373	0.0655557	0.557347	0.57729	0.794205	5	X-Z	CPSF6 Knock-out
CCND3	36505.9	0.0971221	0.0441361	2.20052	0.0277703	0.113322	5	X-Z	CPSF6 Knock-out
PECR	2951.09	-0.0374388	0.0770568	-0.48586	0.627067	0.825873	5	X-Z	CPSF6 Knock-out
CTD-2366F13.1	211.572	0.0453566	0.264606	0.171412	0.8639	0.945725	5	X-Z	CPSF6 Knock-out
CD72	1227.33	0.285125	0.115464	2.46939	0.0135343	0.0653178	5	X-Z	CPSF6 Knock-out
ADAM10	17553.8	0.271167	0.0409085	6.62862	3.38847e-11	1.4247e-09	5	X-Z	CPSF6 Knock-out
bP-2171C21.6	11.104	-1.33764	1.23524	-1.0829	0.278851	NA	5	X-Z	CPSF6 Knock-out
MGME1	4808.63	0.093104	0.065464	1.42222	0.154963	0.380955	5	X-Z	CPSF6 Knock-out
RP1-12G14.7	10.9567	0.206155	1.07892	0.191075	0.848467	NA	5	X-Z	CPSF6 Knock-out
ELOVL7	779.035	-0.41303	0.143966	-2.86894	0.00411846	0.0251813	5	X-Z	CPSF6 Knock-out
LMO2	16.3126	-0.396502	0.927167	-0.427648	0.668907	0.850388	5	X-Z	CPSF6 Knock-out
RP11-82O19.1	22.0619	0.767535	0.826133	0.929069	0.352854	0.620083	5	X-Z	CPSF6 Knock-out
LINC00998	4879.79	0.014089	0.0617013	0.228342	0.81938	0.925214	5	X-Z	CPSF6 Knock-out
SOD2	9447.77	0.292781	0.0518705	5.64446	1.65699e-08	4.33203e-07	5	X-Z	CPSF6 Knock-out
FAM227B	167.976	-0.193402	0.282671	-0.684195	0.493852	0.739175	5	X-Z	CPSF6 Knock-out
LAMTOR4	5071.02	-0.142182	0.0646717	-2.19851	0.0279127	0.113717	5	X-Z	CPSF6 Knock-out
CHMP5	8468.41	0.238902	0.0491811	4.85759	1.18825e-06	2.12344e-05	5	X-Z	CPSF6 Knock-out
CTC-479C5.12	2124.94	-0.339176	0.0999382	-3.39386	0.000689147	0.00565793	5	X-Z	CPSF6 Knock-out
XXcos-LUCA16.1	20.8325	-0.498562	0.90467	-0.551098	0.581567	0.796962	5	X-Z	CPSF6 Knock-out
CBY1	692.412	-0.315519	0.15105	-2.08885	0.0367216	0.139675	5	X-Z	CPSF6 Knock-out
THOC1	7171.38	-0.0558957	0.0552315	-1.01203	0.311526	0.579635	5	X-Z	CPSF6 Knock-out
POLR2A	69476.1	0.0749976	0.0330997	2.26581	0.023463	0.0993826	5	X-Z	CPSF6 Knock-out
PLCXD1	9020.16	0.00934618	0.0498602	0.187448	0.85131	0.940547	5	X-Z	CPSF6 Knock-out
PRPH2	16.0047	-1.20959	1.07731	-1.12278	0.26153	0.525242	5	X-Z	CPSF6 Knock-out
NR4A3	6290.74	0.55451	0.0555823	9.97638	1.93396e-23	2.66434e-21	5	X-Z	CPSF6 Knock-out
CPEB4	1797.48	0.472112	0.111541	4.23263	2.30976e-05	0.000296937	5	X-Z	CPSF6 Knock-out
TMEM88	18.4227	1.71748	1.05672	1.62529	0.104102	0.294135	5	X-Z	CPSF6 Knock-out
RP11-1277A3.3	18.0912	0.428739	1.00258	0.427636	0.668916	0.850388	5	X-Z	CPSF6 Knock-out
CELSR2	932.57	0.137513	0.135265	1.01662	0.309335	0.577494	5	X-Z	CPSF6 Knock-out
NATD1	475.221	0.404297	0.178108	2.26996	0.0232101	0.0986037	5	X-Z	CPSF6 Knock-out
HRH2	2314.61	-0.00344341	0.0817429	-0.0421249	0.966399	0.986769	5	X-Z	CPSF6 Knock-out
SLC39A4	872.375	0.228498	0.12665	1.80416	0.0712058	0.226045	5	X-Z	CPSF6 Knock-out
CYCSP34	17.4416	-1.41476	0.913809	-1.5482	0.121574	0.325286	5	X-Z	CPSF6 Knock-out
ACTG1P1	13.2044	-1.16691	1.01236	-1.15267	0.249047	NA	5	X-Z	CPSF6 Knock-out
EXOC6	2182.96	0.0683005	0.0969882	0.704215	0.481299	0.730112	5	X-Z	CPSF6 Knock-out
HCAR2	31.1286	0.152982	0.690056	0.221695	0.824551	0.927628	5	X-Z	CPSF6 Knock-out
ICOSLG	983.581	0.0637561	0.135867	0.469252	0.63889	0.833626	5	X-Z	CPSF6 Knock-out
RP11-196B3.1	29.1608	-0.545785	0.683052	-0.799039	0.424268	0.68399	5	X-Z	CPSF6 Knock-out
CIRBP	10078.1	-0.210256	0.0500552	-4.20049	2.66337e-05	0.00033573	5	X-Z	CPSF6 Knock-out
RP11-490G8.1	36.7138	0.00682309	0.597429	0.0114208	0.990888	0.997357	5	X-Z	CPSF6 Knock-out
DESI1	4848.21	-0.286523	0.0700347	-4.09116	4.29217e-05	0.000515299	5	X-Z	CPSF6 Knock-out
ST20-AS1	370.172	0.38803	0.213432	1.81805	0.0690566	0.221321	5	X-Z	CPSF6 Knock-out
SLFNL1-AS1	131.228	-0.105835	0.324853	-0.325793	0.744581	0.887548	5	X-Z	CPSF6 Knock-out
INSL3	143.801	-0.0628436	0.304894	-0.206117	0.8367	0.933216	5	X-Z	CPSF6 Knock-out
PDE6G	506.632	0.118787	0.186258	0.637753	0.523634	0.759585	5	X-Z	CPSF6 Knock-out
ASB8	3110	-0.0890757	0.0754218	-1.18103	0.23759	0.495723	5	X-Z	CPSF6 Knock-out
C1R	387.695	0.0688757	0.187874	0.366605	0.713914	0.872559	5	X-Z	CPSF6 Knock-out
AC124944.3	10.6066	-2.05145	1.2927	-1.58695	0.112524	NA	5	X-Z	CPSF6 Knock-out
RP11-368N21.5	23.7116	0.536879	0.768109	0.698962	0.484575	0.732235	5	X-Z	CPSF6 Knock-out
RP11-305L7.3	119.803	0.612054	0.335577	1.82389	0.0681692	0.2196	5	X-Z	CPSF6 Knock-out
TCF4	510.961	0.0604334	0.173841	0.347637	0.728113	0.878593	5	X-Z	CPSF6 Knock-out
BCL11A	17.4867	1.9343	1.04742	1.84672	0.0647871	0.211261	5	X-Z	CPSF6 Knock-out
SNORD104	107.215	-0.369187	0.387856	-0.951867	0.341165	0.609559	5	X-Z	CPSF6 Knock-out
GPNMB	65.5264	-0.803295	0.468719	-1.71381	0.0865634	0.25905	5	X-Z	CPSF6 Knock-out
ARL17B	857.713	0.484947	0.135945	3.56723	0.000360781	0.00324753	5	X-Z	CPSF6 Knock-out
RP11-613G13.1	45.5614	-0.28618	0.538795	-0.531149	0.595316	0.806641	5	X-Z	CPSF6 Knock-out
GNMT	25.1792	0.0299325	0.782289	0.0382626	0.969478	0.988303	5	X-Z	CPSF6 Knock-out
RP11-826N14.2	153.605	0.620507	0.304946	2.03481	0.0418697	0.154213	5	X-Z	CPSF6 Knock-out
RP11-326I11.4	23.9722	0.0953643	0.739225	0.129006	0.897353	0.959228	5	X-Z	CPSF6 Knock-out
SCARNA17	62.3939	-0.0798991	0.460813	-0.173387	0.862347	0.945008	5	X-Z	CPSF6 Knock-out
SPATS2L	4814.57	0.0255154	0.0678227	0.376208	0.706762	0.869452	5	X-Z	CPSF6 Knock-out
RP11-104E19.1	14.925	0.56066	0.958876	0.584706	0.558746	0.783656	5	X-Z	CPSF6 Knock-out
KRT18P57	13.0203	0.273398	0.9899	0.276188	0.782404	NA	5	X-Z	CPSF6 Knock-out
RASGRP4	3589.32	0.114328	0.0690647	1.65538	0.0978472	0.282461	5	X-Z	CPSF6 Knock-out
ARNT2	35.8879	0.364383	0.733677	0.496654	0.619433	0.821863	5	X-Z	CPSF6 Knock-out
KAZALD1	45.8693	0.782817	0.562478	1.39173	0.164005	0.394623	5	X-Z	CPSF6 Knock-out
VWA8	4118.49	-0.0170786	0.0788141	-0.216695	0.828446	0.92863	5	X-Z	CPSF6 Knock-out
RP11-829H16.3	9.82198	1.66	1.18934	1.39574	0.162794	NA	5	X-Z	CPSF6 Knock-out
RP11-701H24.8	30.7735	1.69011	0.752976	2.24457	0.0247955	0.103693	5	X-Z	CPSF6 Knock-out
SSBP1	11833.4	0.0313525	0.0442371	0.708739	0.478487	0.72778	5	X-Z	CPSF6 Knock-out
RP11-989F5.1	16.7286	-0.379283	0.882482	-0.429791	0.667347	0.84964	5	X-Z	CPSF6 Knock-out
IKZF3	7155.18	0.221355	0.0546857	4.04778	5.17062e-05	0.000606884	5	X-Z	CPSF6 Knock-out
NKD1	208.597	-0.559197	0.275991	-2.02614	0.0427502	0.156389	5	X-Z	CPSF6 Knock-out
RP11-336N8.4	8.66852	0.764035	1.37506	0.555638	0.578458	NA	5	X-Z	CPSF6 Knock-out
PIM3	7345.18	0.39039	0.0525566	7.428	1.10252e-13	6.26213e-12	5	X-Z	CPSF6 Knock-out
SLC8A1	406.426	-0.139325	0.19863	-0.701429	0.483035	0.731391	5	X-Z	CPSF6 Knock-out
NPR1	23.242	0.272498	0.776615	0.35088	0.725679	0.877837	5	X-Z	CPSF6 Knock-out
FLJ20021	51.575	-0.115792	0.54285	-0.213304	0.83109	0.930396	5	X-Z	CPSF6 Knock-out
GOLGA8Q	136.961	0.0665179	0.335464	0.198286	0.842821	0.936255	5	X-Z	CPSF6 Knock-out
RP11-706O15.5	69.2147	-0.518852	0.475057	-1.09219	0.27475	0.540787	5	X-Z	CPSF6 Knock-out
RP11-440D17.4	13.3531	-1.14553	1.02509	-1.11749	0.263785	NA	5	X-Z	CPSF6 Knock-out
TXNDC16	959.997	-0.228615	0.126963	-1.80064	0.0717599	0.227173	5	X-Z	CPSF6 Knock-out
ARSK	1067.34	0.143573	0.118538	1.2112	0.225819	0.480401	5	X-Z	CPSF6 Knock-out
TRPV1	1322.89	0.323346	0.116432	2.77711	0.00548446	0.0318002	5	X-Z	CPSF6 Knock-out
EXOSC10	15494.3	0.0129692	0.0423107	0.306523	0.759207	0.895981	5	X-Z	CPSF6 Knock-out
ZC2HC1A	287.311	-0.433379	0.22629	-1.91515	0.055473	0.188778	5	X-Z	CPSF6 Knock-out
C1QBPP2	9.29165	-0.319152	1.23135	-0.259188	0.79549	NA	5	X-Z	CPSF6 Knock-out
RP11-13A1.3	10.9143	0.281618	1.55091	0.181582	0.855911	NA	5	X-Z	CPSF6 Knock-out
RP11-627K11.1	59.8125	-0.288201	0.473484	-0.60868	0.542736	0.773659	5	X-Z	CPSF6 Knock-out
OS9	15166.3	-0.00135729	0.0445519	-0.0304653	0.975696	0.99153	5	X-Z	CPSF6 Knock-out
ZXDC	3178.37	0.105052	0.0760695	1.38099	0.167281	0.399586	5	X-Z	CPSF6 Knock-out
WBP1L	4380.76	0.0055699	0.0619005	0.0899816	0.928302	0.972771	5	X-Z	CPSF6 Knock-out
SUMF2	11061.6	-0.0426503	0.0472621	-0.90242	0.366834	0.633175	5	X-Z	CPSF6 Knock-out
CLUL1	39.5301	0.0355962	0.598153	0.0595102	0.952546	0.981793	5	X-Z	CPSF6 Knock-out
RP1-292B18.1	35.7733	-0.142616	0.605914	-0.235373	0.81392	0.923121	5	X-Z	CPSF6 Knock-out
FAM60CP	317.279	-0.0630088	0.209654	-0.300537	0.763768	0.898238	5	X-Z	CPSF6 Knock-out
POLM	2303.66	-0.204894	0.0883184	-2.31994	0.020344	0.0890651	5	X-Z	CPSF6 Knock-out
RP4-657D16.3	135.73	-0.916244	1.10377	-0.830108	0.406478	0.669658	5	X-Z	CPSF6 Knock-out
TMPRSS5	37.7024	0.266468	0.587779	0.453347	0.650299	0.840456	5	X-Z	CPSF6 Knock-out
LCMT2	1526.37	-0.100691	0.100079	-1.00612	0.31436	0.582342	5	X-Z	CPSF6 Knock-out
SLC35A1	842.621	-0.703144	0.181059	-3.88351	0.000102961	0.0010965	5	X-Z	CPSF6 Knock-out
NPRL2	4959.04	-0.0232985	0.0620098	-0.375723	0.707123	0.869633	5	X-Z	CPSF6 Knock-out
RBM12B	4503.06	-0.026251	0.0822443	-0.319183	0.749588	0.89062	5	X-Z	CPSF6 Knock-out
RP11-488L18.3	11.9181	1.22865	1.10638	1.11051	0.266778	NA	5	X-Z	CPSF6 Knock-out
FAM26F	535.254	0.317319	0.177221	1.79053	0.0733691	0.230689	5	X-Z	CPSF6 Knock-out
RP11-463O12.5	151.934	0.716675	0.307088	2.33378	0.0196072	0.0866485	5	X-Z	CPSF6 Knock-out
RP11-426C22.6	29.3738	0.113856	0.801997	0.141965	0.887107	0.95505	5	X-Z	CPSF6 Knock-out
YTHDF2	11875.4	0.00491745	0.0448712	0.109591	0.912734	0.965875	5	X-Z	CPSF6 Knock-out
RP11-50B3.4	22.5458	-1.27396	0.832142	-1.53095	0.125783	0.332834	5	X-Z	CPSF6 Knock-out
HCG4P5	103.184	-0.231484	0.425219	-0.544388	0.586175	0.800163	5	X-Z	CPSF6 Knock-out
MCTP1	76.8696	-0.1835	0.471967	-0.3888	0.697424	0.864758	5	X-Z	CPSF6 Knock-out
RP11-815J4.6	47.0828	0.426889	0.572833	0.745224	0.456137	0.710949	5	X-Z	CPSF6 Knock-out
TMEM18	3227.75	-0.197041	0.0748192	-2.63357	0.00844935	0.0450284	5	X-Z	CPSF6 Knock-out
POLN	420.758	0.290828	0.190862	1.52376	0.127569	0.335684	5	X-Z	CPSF6 Knock-out
ATP6V1G2	145.627	-0.0087899	0.319327	-0.0275263	0.97804	0.992553	5	X-Z	CPSF6 Knock-out
FMNL1	40905.2	0.0695416	0.0357777	1.94371	0.0519301	0.17978	5	X-Z	CPSF6 Knock-out
MT-ATP8	288289	-0.0185431	0.10188	-0.182009	0.855576	0.942366	5	X-Z	CPSF6 Knock-out
MT-ATP6	194948	-0.077958	0.0387143	-2.01368	0.0440436	0.159528	5	X-Z	CPSF6 Knock-out
KCND3	14.8854	-0.606265	1.24318	-0.487673	0.625782	0.825278	5	X-Z	CPSF6 Knock-out
KCNRG	15.6518	-4.14771	1.56848	-2.64442	0.00818318	0.0438022	5	X-Z	CPSF6 Knock-out
ZNF341-AS1	12.0983	0.625553	1.04284	0.599856	0.548602	NA	5	X-Z	CPSF6 Knock-out
RP13-923O23.7	32.098	-1.3715	0.664801	-2.06303	0.0391097	0.146492	5	X-Z	CPSF6 Knock-out
RP11-580I16.2	39.9056	-0.35261	0.630504	-0.55925	0.575991	0.79335	5	X-Z	CPSF6 Knock-out
RP11-10O17.3	12.2237	1.35806	1.06644	1.27346	0.202856	NA	5	X-Z	CPSF6 Knock-out
RP11-319G6.1	53.4617	-0.237349	0.522174	-0.454539	0.649441	0.83995	5	X-Z	CPSF6 Knock-out
CICP5	17.5728	-1.44125	0.869269	-1.658	0.0973165	0.281523	5	X-Z	CPSF6 Knock-out
PRNP	5715.93	-0.102581	0.0564412	-1.81749	0.0691424	0.221413	5	X-Z	CPSF6 Knock-out
RNF222	9.56606	-1.53723	1.34107	-1.14627	0.251682	NA	5	X-Z	CPSF6 Knock-out
NPIPB5	8718.05	-0.338972	0.0517814	-6.54622	5.90133e-11	2.40321e-09	5	X-Z	CPSF6 Knock-out
RTCA	5892.68	0.19674	0.0604503	3.25457	0.00113564	0.00859027	5	X-Z	CPSF6 Knock-out
UAP1L1	5415.54	-0.0801141	0.0576354	-1.39002	0.164524	0.395236	5	X-Z	CPSF6 Knock-out
MYH15	217.857	0.764743	0.265774	2.87742	0.00400937	0.024654	5	X-Z	CPSF6 Knock-out
EIF3I	28432.3	-0.0563936	0.0360615	-1.56382	0.11786	0.319756	5	X-Z	CPSF6 Knock-out
CTD-2031P19.4	592.917	0.0239718	0.154067	0.155593	0.876354	0.951547	5	X-Z	CPSF6 Knock-out
DDR2	107.632	-0.687997	0.393609	-1.74792	0.0804776	0.246147	5	X-Z	CPSF6 Knock-out
TUFMP1	335.929	0.0516052	0.20755	0.24864	0.803639	0.918048	5	X-Z	CPSF6 Knock-out
DGKZ	13300.8	-0.00216518	0.0435087	-0.0497643	0.96031	0.983984	5	X-Z	CPSF6 Knock-out
FIBP	7098.82	-0.198478	0.0525876	-3.77423	0.000160505	0.00160629	5	X-Z	CPSF6 Knock-out
RP11-10K16.1	70.7277	-0.40427	0.484396	-0.834584	0.403952	0.66809	5	X-Z	CPSF6 Knock-out
GOLGA2P5	2718.03	-0.44124	0.0803144	-5.49391	3.93135e-08	9.58174e-07	5	X-Z	CPSF6 Knock-out
U2AF1L5	9892.47	0.0408696	0.055378	0.738011	0.460508	0.714565	5	X-Z	CPSF6 Knock-out
TMPO-AS1	716.919	0.271158	0.139446	1.94453	0.0518311	0.179476	5	X-Z	CPSF6 Knock-out
RP13-977J11.8	13.9903	-0.126981	0.960677	-0.132179	0.894843	NA	5	X-Z	CPSF6 Knock-out
MRI1	4494.55	-0.096998	0.0645001	-1.50384	0.132622	0.343832	5	X-Z	CPSF6 Knock-out
DRAP1	12103.3	0.00137761	0.049174	0.028015	0.97765	0.992553	5	X-Z	CPSF6 Knock-out
INO80C	1621.13	0.143706	0.103321	1.39086	0.164267	0.394959	5	X-Z	CPSF6 Knock-out
NUDT10	326.831	-0.299605	0.211515	-1.41647	0.156638	0.383189	5	X-Z	CPSF6 Knock-out
CPNE8	591.895	-0.036009	0.164204	-0.219294	0.826421	0.928116	5	X-Z	CPSF6 Knock-out
SMAD3	9644.46	-0.202204	0.0557113	-3.6295	0.000283967	0.00263926	5	X-Z	CPSF6 Knock-out
MGAT3	329.04	0.37342	0.203326	1.83656	0.0662744	0.214993	5	X-Z	CPSF6 Knock-out
SMCHD1	25497.5	0.204547	0.0391118	5.22981	1.69682e-07	3.64207e-06	5	X-Z	CPSF6 Knock-out
AC005795.1	254.632	-0.00332007	0.230219	-0.0144213	0.988494	0.996859	5	X-Z	CPSF6 Knock-out
RP11-18H7.1	66.6813	0.269593	0.469733	0.573929	0.566016	0.78799	5	X-Z	CPSF6 Knock-out
NOB1	13044.5	-0.261481	0.0612963	-4.26585	1.99144e-05	0.000260673	5	X-Z	CPSF6 Knock-out
C1orf74	1344.59	-0.411444	0.110946	-3.70852	0.000208478	0.00201878	5	X-Z	CPSF6 Knock-out
CDC5L	14466	0.0180242	0.0420398	0.428741	0.668112	0.850023	5	X-Z	CPSF6 Knock-out
ABR	11255	-0.016062	0.0473523	-0.339203	0.734457	0.881984	5	X-Z	CPSF6 Knock-out
ITSN2	10450.7	-0.0678961	0.0534635	-1.26995	0.204102	0.451712	5	X-Z	CPSF6 Knock-out
KLF12	4124.99	-0.382828	0.0766586	-4.99393	5.9162e-07	1.1289e-05	5	X-Z	CPSF6 Knock-out
RP11-101E13.5	163.633	-2.07326	0.32318	-6.41518	1.40655e-10	5.34683e-09	5	X-Z	CPSF6 Knock-out
TOE1	2860.3	-0.0153525	0.0751715	-0.204233	0.838171	0.934083	5	X-Z	CPSF6 Knock-out
ATP13A2	5230.06	0.03349	0.0622388	0.538089	0.590516	0.803275	5	X-Z	CPSF6 Knock-out
PKD1L3	22.3665	0.323761	0.789825	0.409916	0.681868	0.856912	5	X-Z	CPSF6 Knock-out
SRPK3	101.143	-0.206589	0.391679	-0.527443	0.597886	0.808432	5	X-Z	CPSF6 Knock-out
ASXL1	27539.4	-0.0756898	0.0418282	-1.80954	0.0703671	0.223969	5	X-Z	CPSF6 Knock-out
RRP1B	15594.8	-0.216965	0.0486189	-4.46256	8.09863e-06	0.00011653	5	X-Z	CPSF6 Knock-out
TMEM221	21.4711	0.096046	0.785823	0.122224	0.902722	0.961475	5	X-Z	CPSF6 Knock-out
SNRNP70	27209.1	0.0202794	0.0377562	0.537116	0.591188	0.803787	5	X-Z	CPSF6 Knock-out
PPP1R15A	10760.3	0.0929146	0.0482592	1.92533	0.0541887	0.185516	5	X-Z	CPSF6 Knock-out
CH17-189H20.1	262.701	0.070807	0.245447	0.288482	0.772978	0.902543	5	X-Z	CPSF6 Knock-out
AC104699.1	12.3475	-0.354273	1.01738	-0.348221	0.727674	NA	5	X-Z	CPSF6 Knock-out
PACRGL	569.611	0.251498	0.157059	1.6013	0.10931	0.303987	5	X-Z	CPSF6 Knock-out
SCARF1	447.168	-0.156648	0.17942	-0.87308	0.382619	0.647533	5	X-Z	CPSF6 Knock-out
CNR1	16.5154	2.66704	1.09826	2.42842	0.0151647	0.0712443	5	X-Z	CPSF6 Knock-out
RP11-540A21.2	57.3312	-0.485963	0.511922	-0.94929	0.342473	0.610717	5	X-Z	CPSF6 Knock-out
LRRC37A3	435.831	-0.248594	0.177126	-1.40348	0.160473	0.38916	5	X-Z	CPSF6 Knock-out
TAP2	15390.9	-0.10001	0.0487971	-2.04951	0.0404118	0.150124	5	X-Z	CPSF6 Knock-out
MRPS23	4588.28	-0.125335	0.0610269	-2.05376	0.0399989	0.148847	5	X-Z	CPSF6 Knock-out
HIST3H2BA	24.9497	0.578476	0.781745	0.73998	0.459312	0.713942	5	X-Z	CPSF6 Knock-out
DDX10	5635.32	0.0729387	0.0643492	1.13348	0.257012	0.519939	5	X-Z	CPSF6 Knock-out
KANK2	331.789	0.303509	0.219905	1.38018	0.16753	0.399818	5	X-Z	CPSF6 Knock-out
SLC23A1	81.3684	-0.460509	0.417837	-1.10213	0.270406	0.53551	5	X-Z	CPSF6 Knock-out
AHDC1	3250.29	0.472455	0.0728859	6.48211	9.04498e-11	3.55665e-09	5	X-Z	CPSF6 Knock-out
NAE1	10389.8	0.0531414	0.0467187	1.13748	0.255339	0.517904	5	X-Z	CPSF6 Knock-out
INPPL1	12699.2	0.0908418	0.0532298	1.7066	0.0878971	0.26159	5	X-Z	CPSF6 Knock-out
MNS1	67.6658	-0.706017	0.488105	-1.44644	0.148053	0.369419	5	X-Z	CPSF6 Knock-out
TTC33	2847.41	-0.219568	0.0765317	-2.86898	0.00411803	0.0251813	5	X-Z	CPSF6 Knock-out
RPL23AP53	227.999	-0.0202149	0.26193	-0.0771766	0.938483	0.976539	5	X-Z	CPSF6 Knock-out
MUM1	3692.64	0.056148	0.0690213	0.813488	0.415938	0.677591	5	X-Z	CPSF6 Knock-out
CYP2R1	1689.95	-0.36965	0.0966677	-3.82393	0.000131342	0.00135457	5	X-Z	CPSF6 Knock-out
TBC1D3K	479.502	-0.358979	0.218372	-1.64388	0.1002	0.286655	5	X-Z	CPSF6 Knock-out
JHDM1D-AS1	2084.15	-0.0829703	0.105482	-0.786586	0.431524	0.690133	5	X-Z	CPSF6 Knock-out
GCLM	2492.6	-0.185627	0.096497	-1.92365	0.0543983	0.186117	5	X-Z	CPSF6 Knock-out
DLEU2	634.313	-0.627211	0.14861	-4.2205	2.43757e-05	0.000310695	5	X-Z	CPSF6 Knock-out
SH3GLB1	8680.53	-0.244712	0.0598239	-4.09053	4.30382e-05	0.00051606	5	X-Z	CPSF6 Knock-out
THEM4	2291.98	-0.143314	0.0982364	-1.45886	0.144602	0.363847	5	X-Z	CPSF6 Knock-out
WDR55	7469.41	-0.13595	0.0517388	-2.62763	0.00859832	0.0456595	5	X-Z	CPSF6 Knock-out
CTNNBL1	8770.54	0.0184261	0.050262	0.366601	0.713916	0.872559	5	X-Z	CPSF6 Knock-out
MOCS2	1732.87	-0.032773	0.0924888	-0.354345	0.72308	0.876435	5	X-Z	CPSF6 Knock-out
IL1R1	618.667	0.315478	0.179186	1.76061	0.0783039	0.241246	5	X-Z	CPSF6 Knock-out
HS6ST1P1	70.288	0.604698	0.437935	1.38079	0.167343	0.399635	5	X-Z	CPSF6 Knock-out
U47924.31	171.535	-0.327177	0.344213	-0.950509	0.341854	0.61025	5	X-Z	CPSF6 Knock-out
RP11-1246C19.1	225.819	-1.42087	0.25606	-5.54897	2.87356e-08	7.1839e-07	5	X-Z	CPSF6 Knock-out
FARP2	2901.4	0.00907617	0.0795014	0.114164	0.909108	0.964445	5	X-Z	CPSF6 Knock-out
MAD2L2	4566.23	0.0624187	0.0635639	0.981985	0.326107	0.595025	5	X-Z	CPSF6 Knock-out
TRIM14	6623.73	-0.48474	0.0609475	-7.95341	1.8145e-15	1.27706e-13	5	X-Z	CPSF6 Knock-out
SERPINE1	232.119	0.533082	0.287191	1.8562	0.0634257	0.207694	5	X-Z	CPSF6 Knock-out
DIAPH2	3072.32	0.236776	0.076103	3.11126	0.00186292	0.012961	5	X-Z	CPSF6 Knock-out
DPH2	3432.67	-0.177709	0.0759378	-2.34019	0.0192737	0.0855557	5	X-Z	CPSF6 Knock-out
RP11-562A8.4	47.6044	0.281692	0.580143	0.485557	0.627281	0.825894	5	X-Z	CPSF6 Knock-out
FBXO3	1190.87	-0.293981	0.115216	-2.55156	0.0107241	0.0544903	5	X-Z	CPSF6 Knock-out
USP35	1689.6	0.182314	0.105557	1.72717	0.0841375	0.253971	5	X-Z	CPSF6 Knock-out
SLC1A5	21218.1	-0.0457601	0.0396899	-1.15294	0.248934	0.509702	5	X-Z	CPSF6 Knock-out
XRRA1	4741.48	0.447322	0.0737097	6.0687	1.28948e-09	4.15393e-08	5	X-Z	CPSF6 Knock-out
AC010226.4	10.423	0.780453	1.09967	0.709713	0.477882	NA	5	X-Z	CPSF6 Knock-out
RP11-84A19.4	27.7986	0.625298	0.696048	0.898355	0.368997	0.634954	5	X-Z	CPSF6 Knock-out
SCO2	1291.16	-0.0612895	0.108415	-0.56532	0.571856	0.790908	5	X-Z	CPSF6 Knock-out
OXCT1	17360.4	-0.030402	0.0413972	-0.734398	0.462706	0.716181	5	X-Z	CPSF6 Knock-out
RP11-407N17.3	15.9054	-4.82324	1.61861	-2.97986	0.00288378	0.0187036	5	X-Z	CPSF6 Knock-out
TFIP11	7813.76	0.0385919	0.056721	0.68038	0.496264	0.740792	5	X-Z	CPSF6 Knock-out
DCST1	40.8844	0.70584	0.586983	1.20249	0.229175	0.485042	5	X-Z	CPSF6 Knock-out
LHPP	709.029	-0.231946	0.147855	-1.56875	0.116707	0.317735	5	X-Z	CPSF6 Knock-out
ATP13A1	7331.66	-0.00860823	0.0590518	-0.145774	0.8841	0.954549	5	X-Z	CPSF6 Knock-out
RP11-767N6.7	120.211	-0.537451	0.34639	-1.55158	0.120763	0.32431	5	X-Z	CPSF6 Knock-out
HYDIN	6.56735	-3.23054	1.84239	-1.75346	0.0795238	NA	5	X-Z	CPSF6 Knock-out
MGST3	2192.34	0.000606553	0.0834126	0.00727172	0.994198	0.998364	5	X-Z	CPSF6 Knock-out
ASUN	14271.3	0.00820555	0.0441398	0.185899	0.852524	0.941204	5	X-Z	CPSF6 Knock-out
PLBD2	5522.69	0.117142	0.0597002	1.96216	0.0497433	0.174133	5	X-Z	CPSF6 Knock-out
RP11-872J21.3	42.4938	0.385146	0.602137	0.639631	0.522412	0.75917	5	X-Z	CPSF6 Knock-out
RP11-347C18.5	14.9974	0.299005	1.15568	0.258726	0.795846	0.913779	5	X-Z	CPSF6 Knock-out
BNIP1	1340.44	-0.141381	0.104655	-1.35093	0.176717	0.413319	5	X-Z	CPSF6 Knock-out
CCDC25	5594.91	-0.363094	0.059884	-6.06328	1.33372e-09	4.28222e-08	5	X-Z	CPSF6 Knock-out
RP11-157D23.2	147.058	0.0935169	0.304064	0.307557	0.75842	0.895861	5	X-Z	CPSF6 Knock-out
SLC25A3	35767.1	-0.187179	0.0375586	-4.98364	6.24004e-07	1.18256e-05	5	X-Z	CPSF6 Knock-out
HK1	68612	-0.00533682	0.0324996	-0.164212	0.869564	0.948715	5	X-Z	CPSF6 Knock-out
ERVMER34-1	35.1749	0.0909256	0.679795	0.133754	0.893597	0.957333	5	X-Z	CPSF6 Knock-out
RP11-295G20.2	457.713	0.125642	0.175697	0.715107	0.474543	0.724629	5	X-Z	CPSF6 Knock-out
AC018890.6	26.1556	0.915957	0.722256	1.26819	0.204731	0.452382	5	X-Z	CPSF6 Knock-out
PES1	17556.4	-0.0296185	0.0453884	-0.652557	0.514042	0.752956	5	X-Z	CPSF6 Knock-out
RXRA	6053.89	0.0996063	0.0701593	1.41972	0.15569	0.381803	5	X-Z	CPSF6 Knock-out
HAP1	34.6966	0.160295	0.625355	0.256327	0.797698	0.914858	5	X-Z	CPSF6 Knock-out
GJA4	33.7037	-1.01349	0.701289	-1.44518	0.148408	0.370163	5	X-Z	CPSF6 Knock-out
MYLK2	34.9141	-0.335303	0.634112	-0.528775	0.596961	0.80768	5	X-Z	CPSF6 Knock-out
PBRM1	13006.2	0.153958	0.0431624	3.56695	0.000361157	0.0032494	5	X-Z	CPSF6 Knock-out
COPZ1	9008.76	0.0688723	0.0522272	1.31871	0.187267	0.429789	5	X-Z	CPSF6 Knock-out
ZNF730	57.5338	-0.33604	0.607173	-0.553451	0.579955	0.795819	5	X-Z	CPSF6 Knock-out
CHCHD3P3	94.6898	0.2317	0.376859	0.61482	0.538674	0.770526	5	X-Z	CPSF6 Knock-out
ZBTB21	4869.36	-0.336125	0.0601021	-5.59257	2.23739e-08	5.6664e-07	5	X-Z	CPSF6 Knock-out
ANO9	7438.25	0.00264894	0.0547777	0.0483579	0.961431	0.984439	5	X-Z	CPSF6 Knock-out
RNF144A-AS1	1816.95	0.180668	0.0947423	1.90694	0.0565278	0.191165	5	X-Z	CPSF6 Knock-out
C20orf195	32.631	0.51361	0.703912	0.72965	0.465604	0.717603	5	X-Z	CPSF6 Knock-out
SCNN1D	537.923	-0.128733	0.162305	-0.793157	0.427687	0.686256	5	X-Z	CPSF6 Knock-out
ODF2-AS1	19.0005	-0.646816	0.828127	-0.781059	0.434768	0.69264	5	X-Z	CPSF6 Knock-out
C18orf21	1434.79	-0.0211128	0.111132	-0.18998	0.849325	0.939583	5	X-Z	CPSF6 Knock-out
ZNF383	903.577	-0.506779	0.131055	-3.8669	0.000110225	0.00115988	5	X-Z	CPSF6 Knock-out
ARHGAP27	5913.52	-0.0307418	0.0682035	-0.450737	0.652179	0.841822	5	X-Z	CPSF6 Knock-out
HSP90AB1	330299	-0.0899715	0.029814	-3.01776	0.00254647	0.0168192	5	X-Z	CPSF6 Knock-out
CCDC124	8314.69	0.12515	0.0584256	2.14205	0.0321897	0.12663	5	X-Z	CPSF6 Knock-out
RP11-473M20.9	423.11	-0.447289	0.203254	-2.20064	0.0277614	0.113315	5	X-Z	CPSF6 Knock-out
IFT43	361.013	-0.251869	0.196868	-1.27938	0.200764	0.447383	5	X-Z	CPSF6 Knock-out
GBP4	10947.5	0.00383942	0.0597142	0.0642966	0.948734	0.980705	5	X-Z	CPSF6 Knock-out
FANCF	1747.25	-0.23049	0.129295	-1.78267	0.0746402	0.233326	5	X-Z	CPSF6 Knock-out
CH507-154B10.2	40.8215	-0.19101	0.572221	-0.333805	0.738527	0.883912	5	X-Z	CPSF6 Knock-out
ATXN7L3B	9245.93	0.053738	0.0473094	1.13588	0.256006	0.518714	5	X-Z	CPSF6 Knock-out
RPS6KA2	489.542	-0.108782	0.178646	-0.608926	0.542574	0.773561	5	X-Z	CPSF6 Knock-out
WASH2P	1693.66	-0.139244	0.108793	-1.2799	0.200581	0.447233	5	X-Z	CPSF6 Knock-out
HCFC2	1449.33	0.668612	0.107117	6.24186	4.32392e-10	1.5216e-08	5	X-Z	CPSF6 Knock-out
ZDHHC20P1	7.81976	0.177222	1.75879	0.100764	0.919738	NA	5	X-Z	CPSF6 Knock-out
SCARNA13	41.9472	0.530552	0.578163	0.917652	0.358801	0.625985	5	X-Z	CPSF6 Knock-out
RP11-438L7.3	202.292	0.072834	0.259015	0.281196	0.77856	0.90495	5	X-Z	CPSF6 Knock-out
ECSIT	3910.49	-0.149646	0.0739222	-2.02438	0.0429315	0.156786	5	X-Z	CPSF6 Knock-out
TUBBP6	16.453	-0.520367	0.951092	-0.547126	0.584292	0.798668	5	X-Z	CPSF6 Knock-out
CTD-3126B10.5	73.4454	-0.210972	0.42379	-0.497823	0.618609	0.821247	5	X-Z	CPSF6 Knock-out
RPL39L	762.804	-0.258765	0.168528	-1.53545	0.124674	0.330983	5	X-Z	CPSF6 Knock-out
SHISA9	106.82	0.8398	0.358176	2.34466	0.0190445	0.0848873	5	X-Z	CPSF6 Knock-out
AC005538.3	111.97	1.41912	0.441709	3.21279	0.00131451	0.00972736	5	X-Z	CPSF6 Knock-out
CTA-223H9.9	16.3745	1.62091	0.908348	1.78445	0.07435	0.232884	5	X-Z	CPSF6 Knock-out
MIR155HG	11095.2	0.451338	0.0712231	6.33696	2.34338e-10	8.63762e-09	5	X-Z	CPSF6 Knock-out
AC093388.3	8.35497	-0.165071	1.46057	-0.113018	0.910016	NA	5	X-Z	CPSF6 Knock-out
RP13-228J13.5	55.2856	-0.202523	0.488627	-0.414473	0.678528	0.855315	5	X-Z	CPSF6 Knock-out
RMDN1	3009.58	-0.749354	0.0747305	-10.0274	1.15499e-23	1.64969e-21	5	X-Z	CPSF6 Knock-out
SLC25A34	48.2777	-0.879293	0.550037	-1.59861	0.109908	0.305388	5	X-Z	CPSF6 Knock-out
ZNF318	5312.39	0.00153868	0.0593419	0.0259291	0.979314	0.992864	5	X-Z	CPSF6 Knock-out
TBL3	4564.5	0.10947	0.0618056	1.77121	0.0765264	0.237241	5	X-Z	CPSF6 Knock-out
AC010761.13	41.0822	-0.281534	0.659781	-0.426708	0.669592	0.850619	5	X-Z	CPSF6 Knock-out
UBE2A	5651.73	-0.354814	0.0582783	-6.08827	1.1414e-09	3.70765e-08	5	X-Z	CPSF6 Knock-out
TRAV1-2	192.291	0.0237411	0.286365	0.082905	0.933927	0.975098	5	X-Z	CPSF6 Knock-out
RP11-96K19.4	100.689	-0.415797	0.434717	-0.956477	0.338831	0.606953	5	X-Z	CPSF6 Knock-out
SRP9P1	673.86	-0.671521	0.155065	-4.33059	1.48711e-05	0.000201585	5	X-Z	CPSF6 Knock-out
PPT2-EGFL8	441.808	-0.100545	0.266533	-0.377234	0.706	0.869324	5	X-Z	CPSF6 Knock-out
PSMD11	15547.8	0.169628	0.0451359	3.75816	0.000171168	0.00170073	5	X-Z	CPSF6 Knock-out
TUSC1	34.7421	-0.0855038	0.70755	-0.120845	0.903814	0.962063	5	X-Z	CPSF6 Knock-out
RP11-680H20.1	1019.81	-0.142546	0.120267	-1.18524	0.235923	0.494447	5	X-Z	CPSF6 Knock-out
AKT2	16825	0.0844179	0.0402013	2.09988	0.0357395	0.136877	5	X-Z	CPSF6 Knock-out
FASTK	4512.91	0.0168599	0.0632438	0.266587	0.789787	0.911456	5	X-Z	CPSF6 Knock-out
PNPT1	4156.1	-0.320594	0.0672152	-4.76966	1.84533e-06	3.16098e-05	5	X-Z	CPSF6 Knock-out
KIAA1456	8.95596	-1.33348	1.71291	-0.778486	0.436283	NA	5	X-Z	CPSF6 Knock-out
FAM174B	389.089	0.661389	0.235034	2.81401	0.00489272	0.0290379	5	X-Z	CPSF6 Knock-out
PRMT5	11123.9	0.190483	0.0464946	4.09688	4.18758e-05	0.000504927	5	X-Z	CPSF6 Knock-out
LPCAT1	8411.31	0.155563	0.0504558	3.08316	0.00204818	0.0140011	5	X-Z	CPSF6 Knock-out
RP11-263K19.4	109.402	-0.297723	0.378226	-0.787158	0.431189	0.689654	5	X-Z	CPSF6 Knock-out
LINC00299	16.7318	-0.507813	0.885432	-0.57352	0.566293	0.788034	5	X-Z	CPSF6 Knock-out
DYX1C1-CCPG1	54.534	-1.43421	1.75892	-0.815391	0.414849	0.677066	5	X-Z	CPSF6 Knock-out
SYNPO	68.9903	-0.0437114	0.493768	-0.0885261	0.929459	0.973406	5	X-Z	CPSF6 Knock-out
CGGBP1	11428.2	-1.22307	0.064832	-18.8652	2.20586e-79	7.14146e-76	5	X-Z	CPSF6 Knock-out
TMEM9B-AS1	150.433	0.315758	0.301544	1.04714	0.295036	0.562808	5	X-Z	CPSF6 Knock-out
SLC45A4	1211.88	-0.034482	0.119544	-0.288447	0.773005	0.902543	5	X-Z	CPSF6 Knock-out
NBEAL2	21230.3	-0.126453	0.0395096	-3.20057	0.00137155	0.0100575	5	X-Z	CPSF6 Knock-out
MPV17L2	363.103	0.376598	0.196972	1.91194	0.0558845	0.189584	5	X-Z	CPSF6 Knock-out
JTB	8208.12	0.125138	0.0504986	2.47805	0.0132104	0.0640571	5	X-Z	CPSF6 Knock-out
CTB-55O6.8	764.947	0.350189	0.140173	2.49826	0.0124805	0.0615004	5	X-Z	CPSF6 Knock-out
HAVCR1	91.6288	-0.52046	0.44768	-1.16257	0.245003	0.504584	5	X-Z	CPSF6 Knock-out
LBX2-AS1	383.061	0.430102	0.206275	2.08509	0.0370611	0.14058	5	X-Z	CPSF6 Knock-out
APOC1	42.4161	0.296167	0.600221	0.493429	0.621709	0.823224	5	X-Z	CPSF6 Knock-out
GAPDHP22	11.0054	-0.0806625	1.23878	-0.0651145	0.948083	NA	5	X-Z	CPSF6 Knock-out
DDIT4	127186	-0.0790658	0.0300716	-2.62925	0.00855731	0.0454914	5	X-Z	CPSF6 Knock-out
PRKD3	5698.8	0.0922776	0.0559043	1.65063	0.0988135	0.284195	5	X-Z	CPSF6 Knock-out
ZNF891	911.795	-0.283669	0.133633	-2.12274	0.0337756	0.131006	5	X-Z	CPSF6 Knock-out
WDR82P1	155.924	-0.136292	0.29348	-0.464397	0.642363	0.836038	5	X-Z	CPSF6 Knock-out
AP000240.9	15.3752	2.24017	0.967538	2.31532	0.0205952	0.0899621	5	X-Z	CPSF6 Knock-out
GGCX	1482.2	-0.0851791	0.103267	-0.824841	0.409462	0.671964	5	X-Z	CPSF6 Knock-out
GUSBP3	50.4452	-0.153839	0.521779	-0.294836	0.768119	0.899759	5	X-Z	CPSF6 Knock-out
SNIP1	3070.83	0.00962948	0.0763032	0.1262	0.899573	0.959972	5	X-Z	CPSF6 Knock-out
RP11-15A1.4	27.2871	0.213926	0.6951	0.307764	0.758262	0.895841	5	X-Z	CPSF6 Knock-out
HIST1H4J	39.6568	0.220695	0.588317	0.375129	0.707564	0.869997	5	X-Z	CPSF6 Knock-out
AC010976.2	63.0945	0.13647	0.467011	0.292219	0.770119	0.90089	5	X-Z	CPSF6 Knock-out
RP13-554M15.2	37.2714	0.129348	0.604586	0.213945	0.83059	0.930087	5	X-Z	CPSF6 Knock-out
RRAD	635.342	0.95887	0.152449	6.28979	3.17906e-10	1.14301e-08	5	X-Z	CPSF6 Knock-out
CIDEB	869.6	0.0172746	0.129231	0.133673	0.893661	0.957333	5	X-Z	CPSF6 Knock-out
C5orf58	67.5328	-0.503154	0.44419	-1.13274	0.257322	0.520242	5	X-Z	CPSF6 Knock-out
CDC42	31794.4	0.0163664	0.0396717	0.412545	0.67994	0.856133	5	X-Z	CPSF6 Knock-out
PHB2	27563.5	-0.103001	0.0378577	-2.72073	0.00651383	0.0364119	5	X-Z	CPSF6 Knock-out
LMBR1L	3051.19	-0.232059	0.072266	-3.21118	0.00132192	0.00976733	5	X-Z	CPSF6 Knock-out
RP11-152F13.8	158.421	0.247092	0.30045	0.822406	0.410846	0.673418	5	X-Z	CPSF6 Knock-out
PLEKHJ1	5286.18	0.0385822	0.0614717	0.627641	0.530239	0.764825	5	X-Z	CPSF6 Knock-out
PRRT1	112.506	0.81234	0.367818	2.20854	0.0272067	0.111472	5	X-Z	CPSF6 Knock-out
PPP4R4	207.605	-0.216616	0.26037	-0.831956	0.405434	0.668874	5	X-Z	CPSF6 Knock-out
BMS1P2	57.7937	-1.22408	0.556285	-2.20045	0.0277747	0.113322	5	X-Z	CPSF6 Knock-out
DSE	1369.01	0.431935	0.104092	4.14956	3.33116e-05	0.000411035	5	X-Z	CPSF6 Knock-out
GABPB2	1949.07	0.0998868	0.0888984	1.12361	0.26118	0.525025	5	X-Z	CPSF6 Knock-out
RP11-408E5.4	16.3936	1.01854	0.926409	1.09945	0.271574	0.536765	5	X-Z	CPSF6 Knock-out
LIG1	20902	-0.169856	0.0411653	-4.12619	3.6883e-05	0.000449469	5	X-Z	CPSF6 Knock-out
MAGEF1	1850.63	0.137015	0.0902411	1.51833	0.128932	0.337931	5	X-Z	CPSF6 Knock-out
UPF3AP2	106.518	0.448826	0.423228	1.06048	0.288925	0.556353	5	X-Z	CPSF6 Knock-out
MYH7	50.1453	-0.180322	0.534551	-0.337333	0.735866	0.882547	5	X-Z	CPSF6 Knock-out
AC104651.2	156.37	-0.145491	0.295861	-0.491754	0.622893	0.823725	5	X-Z	CPSF6 Knock-out
RP1-273G13.2	8.72577	0.981073	1.2351	0.794324	0.427007	NA	5	X-Z	CPSF6 Knock-out
FEM1B	6230.25	-0.485364	0.0612368	-7.92602	2.26288e-15	1.56987e-13	5	X-Z	CPSF6 Knock-out
TOMM7	8046.8	-0.102775	0.0508525	-2.02104	0.0432758	0.15751	5	X-Z	CPSF6 Knock-out
TOB2P1	13.8626	1.02089	0.999962	1.02093	0.307288	NA	5	X-Z	CPSF6 Knock-out
ARFIP2	4586.24	-0.029145	0.066572	-0.437797	0.661533	0.8477	5	X-Z	CPSF6 Knock-out
SEPW1	4903.56	-0.0481658	0.0615934	-0.781997	0.434217	0.692226	5	X-Z	CPSF6 Knock-out
HMGN1P37	58.2434	0.110334	0.479034	0.230326	0.817838	0.924531	5	X-Z	CPSF6 Knock-out
IRGQ	2540.51	0.206903	0.0802478	2.57831	0.0099286	0.0512797	5	X-Z	CPSF6 Knock-out
RP11-1029J19.5	36.0805	-0.283907	0.661577	-0.429136	0.667824	0.849893	5	X-Z	CPSF6 Knock-out
HNRNPABP1	16.5516	-1.0068	0.929369	-1.08331	0.27867	0.544639	5	X-Z	CPSF6 Knock-out
RP11-350N15.4	21.3373	-1.71236	0.812759	-2.10685	0.035131	0.135133	5	X-Z	CPSF6 Knock-out
RPL21P123	11.086	0.670163	1.0715	0.625444	0.53168	NA	5	X-Z	CPSF6 Knock-out
LOXL1-AS1	337.954	-0.40759	0.226199	-1.80191	0.0715598	0.226762	5	X-Z	CPSF6 Knock-out
HMGN3-AS1	51.1322	0.349682	0.523508	0.667959	0.50416	0.746783	5	X-Z	CPSF6 Knock-out
TMEM200A	276.188	0.140953	0.223639	0.630271	0.528517	0.763595	5	X-Z	CPSF6 Knock-out
TMEM256	1743.16	0.0882611	0.105637	0.835513	0.403429	0.667879	5	X-Z	CPSF6 Knock-out
VAPB	5192.31	0.139167	0.0636632	2.18599	0.0288166	0.116447	5	X-Z	CPSF6 Knock-out
RP4-791C19.1	62.4497	0.722708	0.464457	1.55603	0.119701	0.3229	5	X-Z	CPSF6 Knock-out
RPS10L	33.098	0.481131	0.686991	0.700346	0.483711	0.731793	5	X-Z	CPSF6 Knock-out
ANKRD20A3	206.99	0.270523	0.259358	1.04305	0.296926	0.564426	5	X-Z	CPSF6 Knock-out
SLAMF6	4812.73	-0.205582	0.0612454	-3.3567	0.000788792	0.00630547	5	X-Z	CPSF6 Knock-out
LCA5L	56.2383	1.16068	0.533037	2.17748	0.0294447	0.118419	5	X-Z	CPSF6 Knock-out
ZFAND5	9191.39	-0.241465	0.05105	-4.72996	2.24561e-06	3.7572e-05	5	X-Z	CPSF6 Knock-out
RAI14	146.171	0.441267	0.322808	1.36697	0.171636	0.405847	5	X-Z	CPSF6 Knock-out
HIGD1A	8093.68	-0.0166658	0.0545367	-0.30559	0.759917	0.896368	5	X-Z	CPSF6 Knock-out
DET1	222.354	0.0294173	0.296053	0.0993649	0.920849	0.969721	5	X-Z	CPSF6 Knock-out
NPIPB15	194.744	-0.245868	0.263583	-0.932791	0.350928	0.618526	5	X-Z	CPSF6 Knock-out
ORAI1	2671.83	-0.0656023	0.0783248	-0.837568	0.402273	0.666908	5	X-Z	CPSF6 Knock-out
SRBD1	2714.7	0.0309309	0.0820787	0.376844	0.70629	0.869324	5	X-Z	CPSF6 Knock-out
ARGLU1	10249.9	-0.051421	0.0514719	-0.999011	0.31779	0.586117	5	X-Z	CPSF6 Knock-out
MARCKSL1P1	14.7263	-0.0635291	0.954247	-0.0665751	0.94692	NA	5	X-Z	CPSF6 Knock-out
ADM	6969.84	0.106909	0.0694148	1.54015	0.123523	0.328991	5	X-Z	CPSF6 Knock-out
SALL4	21.8124	1.48281	0.820848	1.80644	0.0708501	0.225321	5	X-Z	CPSF6 Knock-out
SLC22A13	31.473	0.282041	0.678825	0.415484	0.677788	0.854834	5	X-Z	CPSF6 Knock-out
ST3GAL1P1	21.1308	0.776302	0.819683	0.947076	0.3436	0.61186	5	X-Z	CPSF6 Knock-out
KIF18B	4942.59	0.0292979	0.0673464	0.435033	0.663538	0.848646	5	X-Z	CPSF6 Knock-out
ABCA1	1141.85	0.0710623	0.114812	0.618946	0.535952	0.768821	5	X-Z	CPSF6 Knock-out
GPR155	2640.84	0.121279	0.0864254	1.40328	0.160532	0.38916	5	X-Z	CPSF6 Knock-out
RP5-994D16.3	16.7141	0.310696	0.918706	0.338189	0.735221	0.882347	5	X-Z	CPSF6 Knock-out
RP11-299G20.5	31.3375	0.503957	0.694896	0.725226	0.468314	0.719642	5	X-Z	CPSF6 Knock-out
RP3-467D16.3	7.15777	2.22045	1.50287	1.47747	0.13955	NA	5	X-Z	CPSF6 Knock-out
PDCL3P4	37.4497	-0.384846	0.636536	-0.604595	0.545448	0.775453	5	X-Z	CPSF6 Knock-out
RBM34	8220.38	-0.16609	0.050043	-3.31895	0.000903562	0.00708873	5	X-Z	CPSF6 Knock-out
FAM134B	2304.81	-0.025493	0.0856308	-0.297708	0.765926	0.899124	5	X-Z	CPSF6 Knock-out
COX7C	12134.1	-0.107672	0.0453491	-2.37428	0.0175831	0.0797647	5	X-Z	CPSF6 Knock-out
SMAD7	1835.35	0.253694	0.0953218	2.66145	0.00778053	0.0419369	5	X-Z	CPSF6 Knock-out
CCDC148	6.30169	0.489928	1.86137	0.263208	0.79239	NA	5	X-Z	CPSF6 Knock-out
PRR29-AS1	58.393	1.20086e-05	0.516682	2.32418e-05	0.999981	0.999981	5	X-Z	CPSF6 Knock-out
ARMC10P1	175.483	0.000295881	0.285084	0.00103787	0.999172	0.999395	5	X-Z	CPSF6 Knock-out
ZNF788	1520.63	0.14574	0.105446	1.38213	0.166933	0.399145	5	X-Z	CPSF6 Knock-out
HLA-DOB	298.49	0.111196	0.234062	0.475072	0.634736	0.831192	5	X-Z	CPSF6 Knock-out
IFRD2	6530.75	0.0549303	0.0541709	1.01402	0.310574	0.578813	5	X-Z	CPSF6 Knock-out
NINJ2	365.43	-0.469555	0.224864	-2.08817	0.0367822	0.13985	5	X-Z	CPSF6 Knock-out
ID2-AS1	28.872	0.287036	0.701985	0.408892	0.682619	0.857117	5	X-Z	CPSF6 Knock-out
ZPR1	7295.73	0.0396956	0.0565065	0.702496	0.48237	0.730892	5	X-Z	CPSF6 Knock-out
ELOVL1	5427.53	0.22902	0.0665065	3.44358	0.000574075	0.00482119	5	X-Z	CPSF6 Knock-out
CRYBB3	29.6075	0.975103	0.691054	1.41104	0.158234	0.385544	5	X-Z	CPSF6 Knock-out
CHADL	12.3985	0.690401	1.33202	0.51831	0.604242	NA	5	X-Z	CPSF6 Knock-out
HECTD1	14088.1	-0.0617723	0.0430462	-1.43502	0.151281	0.374872	5	X-Z	CPSF6 Knock-out
OTUD6B-AS1	1663.76	-0.00962327	0.10029	-0.0959542	0.923557	0.971143	5	X-Z	CPSF6 Knock-out
MIR34AHG	1303.89	2.18172	2.37134	0.920038	0.357553	0.624705	5	X-Z	CPSF6 Knock-out
RP11-158H5.7	751.138	-0.59155	0.147981	-3.99746	6.4026e-05	0.000726039	5	X-Z	CPSF6 Knock-out
ACO2	16186.2	0.00680233	0.0425907	0.159714	0.873107	0.95001	5	X-Z	CPSF6 Knock-out
MGAT4A	14752.4	0.0946049	0.0504997	1.87338	0.0610163	0.201984	5	X-Z	CPSF6 Knock-out
DHX38	18214.1	0.0189075	0.0409855	0.461322	0.644568	0.837787	5	X-Z	CPSF6 Knock-out
ANKRD65	32.5132	0.52269	0.654088	0.799112	0.424226	0.68399	5	X-Z	CPSF6 Knock-out
RBM14-RBM4	1108.97	-0.41592	0.156668	-2.65479	0.00793587	0.0426665	5	X-Z	CPSF6 Knock-out
SAPCD1	261.093	-0.403213	0.232969	-1.73076	0.0834949	0.252736	5	X-Z	CPSF6 Knock-out
PCBD1	2592.38	-0.190847	0.0777125	-2.45581	0.0140566	0.0672867	5	X-Z	CPSF6 Knock-out
RP5-1171I10.5	8303.4	0.288197	0.0617555	4.66674	3.06022e-06	4.974e-05	5	X-Z	CPSF6 Knock-out
PITHD1	5489.42	0.0659994	0.0658209	1.00271	0.316	0.584044	5	X-Z	CPSF6 Knock-out
RPL18AP7	44.3585	-1.05377	0.559029	-1.885	0.05943	0.198355	5	X-Z	CPSF6 Knock-out
ASPHD1	351.435	0.747817	0.199914	3.74069	0.000183518	0.00180773	5	X-Z	CPSF6 Knock-out
STARD8	581.184	0.32207	0.155773	2.06756	0.0386817	0.145112	5	X-Z	CPSF6 Knock-out
RCSD1	21095.7	-0.282427	0.0473931	-5.95924	2.53415e-09	7.67954e-08	5	X-Z	CPSF6 Knock-out
CA14	58.2222	-1.14336	0.5144	-2.2227	0.0262357	0.108522	5	X-Z	CPSF6 Knock-out
RP11-362K14.5	155.884	-0.504096	1.12806	-0.44687	0.654969	0.843349	5	X-Z	CPSF6 Knock-out
LINC01176	30.2174	0.356617	0.691654	0.5156	0.606134	0.813076	5	X-Z	CPSF6 Knock-out
JMJD8	2186.81	0.050266	0.0830775	0.60505	0.545145	0.775386	5	X-Z	CPSF6 Knock-out
KPTN	693.569	0.162344	0.180938	0.897238	0.369592	0.635282	5	X-Z	CPSF6 Knock-out
RP11-834C11.7	64.8313	0.0407959	0.487889	0.0836171	0.933361	0.975023	5	X-Z	CPSF6 Knock-out
PPIEL	54.5858	-0.225592	0.516572	-0.436709	0.662322	0.848107	5	X-Z	CPSF6 Knock-out
CDH20	19.4287	1.27825	0.987432	1.29452	0.195485	0.44047	5	X-Z	CPSF6 Knock-out
URB2	3471.09	0.183053	0.0745822	2.45438	0.014113	0.0674733	5	X-Z	CPSF6 Knock-out
AC074212.5	30.4248	-0.431669	0.773585	-0.558011	0.576837	0.794038	5	X-Z	CPSF6 Knock-out
PDF	349.417	0.234749	0.260192	0.902214	0.366943	0.633194	5	X-Z	CPSF6 Knock-out
SDK2	439.545	-0.073732	0.218226	-0.337871	0.735461	0.882437	5	X-Z	CPSF6 Knock-out
LINC01446	9.56639	1.0291	1.40352	0.733227	0.46342	NA	5	X-Z	CPSF6 Knock-out
DRP2	338.822	0.227316	0.223493	1.01711	0.309102	0.577281	5	X-Z	CPSF6 Knock-out
ESYT1	51710.6	0.111074	0.0329016	3.37593	0.000735665	0.00597171	5	X-Z	CPSF6 Knock-out
CTD-2517M22.14	559.316	0.124351	0.182422	0.681667	0.495449	0.740271	5	X-Z	CPSF6 Knock-out
AFG3L1P	1675.98	-0.188728	0.0990225	-1.90591	0.0566622	0.191486	5	X-Z	CPSF6 Knock-out
PAFAH1B3	2917.83	0.0301574	0.0733015	0.411416	0.680768	0.856517	5	X-Z	CPSF6 Knock-out
DCLRE1B	3960.24	-0.160516	0.0696788	-2.30365	0.0212422	0.0919612	5	X-Z	CPSF6 Knock-out
RP11-444D3.1	20.0807	2.31233	1.01383	2.28078	0.0225612	0.0965308	5	X-Z	CPSF6 Knock-out
HMGB3P32	77.3726	-0.236681	0.436051	-0.542784	0.587278	0.800722	5	X-Z	CPSF6 Knock-out
THAP7	1983.79	0.156485	0.0910369	1.71892	0.0856298	0.257128	5	X-Z	CPSF6 Knock-out
MYLPF	23.6557	-0.30605	0.771531	-0.396678	0.691605	0.862497	5	X-Z	CPSF6 Knock-out
SHISA7	9.72858	2.35303	1.33043	1.76862	0.0769571	NA	5	X-Z	CPSF6 Knock-out
CTD-2319I12.10	130.15	-0.128957	0.337599	-0.381981	0.702475	0.867506	5	X-Z	CPSF6 Knock-out
PDSS2	2156.37	-0.17127	0.0837721	-2.04448	0.040906	0.151554	5	X-Z	CPSF6 Knock-out
LMAN1	32604.3	-0.446154	0.0397801	-11.2155	3.42155e-29	8.00766e-27	5	X-Z	CPSF6 Knock-out
RP11-158K1.3	70.3202	-1.8778	0.469891	-3.99625	6.43537e-05	0.000728904	5	X-Z	CPSF6 Knock-out
GPSM2	2838.85	-0.140642	0.0748331	-1.87941	0.0601881	0.200026	5	X-Z	CPSF6 Knock-out
HK2P1	11.5609	0.62069	1.05969	0.585729	0.558057	NA	5	X-Z	CPSF6 Knock-out
MON2	4624.8	-0.0853491	0.0610674	-1.39762	0.162227	0.391704	5	X-Z	CPSF6 Knock-out
DDX18P5	32.0456	0.111682	0.638177	0.175002	0.861078	0.944353	5	X-Z	CPSF6 Knock-out
AP000640.10	20.5835	0.277727	0.790813	0.351191	0.725445	0.87775	5	X-Z	CPSF6 Knock-out
PTPN22	10174.5	0.226399	0.0470925	4.80753	1.5281e-06	2.66696e-05	5	X-Z	CPSF6 Knock-out
UBL4A	7575.54	0.134307	0.052974	2.53533	0.0112342	0.0565785	5	X-Z	CPSF6 Knock-out
COMMD7	3515.14	0.00370376	0.0701356	0.0528086	0.957884	0.983608	5	X-Z	CPSF6 Knock-out
STK24-AS1	8.85551	2.8581	1.4801	1.93102	0.0534811	NA	5	X-Z	CPSF6 Knock-out
CTD-2134A5.4	15.5093	-0.123272	0.909867	-0.135484	0.892229	0.956923	5	X-Z	CPSF6 Knock-out
ZNF398	2789.98	-0.0679052	0.0794165	-0.855052	0.392523	0.657023	5	X-Z	CPSF6 Knock-out
CISD2	3703.88	-0.0168347	0.0678579	-0.248088	0.804066	0.91817	5	X-Z	CPSF6 Knock-out
RC3H2	6932.67	0.0725855	0.0650245	1.11628	0.264303	0.528198	5	X-Z	CPSF6 Knock-out
CCBL1	1663.25	0.246223	0.0992733	2.48025	0.013129	0.0637578	5	X-Z	CPSF6 Knock-out
CD274	3757.87	0.355258	0.0744356	4.7727	1.81776e-06	3.12478e-05	5	X-Z	CPSF6 Knock-out
CRBN	4004.46	-0.101469	0.0667852	-1.51933	0.12868	0.337647	5	X-Z	CPSF6 Knock-out
CRYZP1	35.7612	-0.162573	0.605134	-0.268656	0.788195	0.910426	5	X-Z	CPSF6 Knock-out
RP11-434H6.6	143.677	0.495721	0.323019	1.53465	0.12487	0.331344	5	X-Z	CPSF6 Knock-out
RP11-229D13.3	51.1994	-0.15037	0.553673	-0.271587	0.78594	0.909191	5	X-Z	CPSF6 Knock-out
ROMO1	2755.22	0.0653282	0.0751717	0.869052	0.384819	0.649839	5	X-Z	CPSF6 Knock-out
DLX4	56.6619	0.733499	0.486709	1.50706	0.131796	0.342469	5	X-Z	CPSF6 Knock-out
USP14	12408	-0.218301	0.0500591	-4.36086	1.29549e-05	0.000178222	5	X-Z	CPSF6 Knock-out
PDE2A	67.6807	-0.242342	0.498578	-0.486066	0.626921	0.825791	5	X-Z	CPSF6 Knock-out
AC021106.1	19.0237	-2.34603	0.972886	-2.41142	0.0158907	0.0737128	5	X-Z	CPSF6 Knock-out
EEFSEC	3008.07	-0.00821122	0.0732819	-0.11205	0.910784	0.965336	5	X-Z	CPSF6 Knock-out
CYP26C1	27.7639	0.256138	0.685101	0.373868	0.708502	0.870088	5	X-Z	CPSF6 Knock-out
C7orf25	726.888	0.191595	0.148509	1.29012	0.197008	0.443023	5	X-Z	CPSF6 Knock-out
RP11-543B16.1	21.7093	0.210685	0.781491	0.269593	0.787473	0.910082	5	X-Z	CPSF6 Knock-out
PRH1-PRR4	90.3885	0.194609	0.386885	0.503015	0.614953	0.818561	5	X-Z	CPSF6 Knock-out
ZNF266	4310.27	-0.00488118	0.0663214	-0.0735989	0.94133	0.978033	5	X-Z	CPSF6 Knock-out
RP11-91P24.5	10.9826	-0.445809	1.08572	-0.410611	0.681358	NA	5	X-Z	CPSF6 Knock-out
PRDM10	3587.53	-0.0492297	0.0759309	-0.648348	0.51676	0.754911	5	X-Z	CPSF6 Knock-out
FAM173B	641.67	0.0784718	0.160376	0.489298	0.624631	0.824676	5	X-Z	CPSF6 Knock-out
PITPNA-AS1	449.496	-0.224003	0.250367	-0.894698	0.370949	0.636375	5	X-Z	CPSF6 Knock-out
BNIP3P1	519.204	-0.0621888	0.166254	-0.374058	0.708361	0.870088	5	X-Z	CPSF6 Knock-out
ZFR	11718.2	0.26131	0.0596889	4.37786	1.19848e-05	0.000165933	5	X-Z	CPSF6 Knock-out
PARN	8037.15	0.0227266	0.0508275	0.447133	0.654779	0.843273	5	X-Z	CPSF6 Knock-out
GOLGA8UP	41.6095	0.872796	0.582969	1.49716	0.134353	0.346873	5	X-Z	CPSF6 Knock-out
DACT3-AS1	10.178	0.00812407	1.14462	0.00709764	0.994337	NA	5	X-Z	CPSF6 Knock-out
ARMC5	1367.02	0.128315	0.108472	1.18294	0.236833	0.495201	5	X-Z	CPSF6 Knock-out
TH2LCRR	16.8649	0.0790386	0.890702	0.0887374	0.929291	0.973406	5	X-Z	CPSF6 Knock-out
JRKL	2899.44	-0.0737613	0.0771459	-0.956127	0.339008	0.607158	5	X-Z	CPSF6 Knock-out
TMBIM6	54005.8	-0.130143	0.0322276	-4.03825	5.38514e-05	0.000628266	5	X-Z	CPSF6 Knock-out
ACAD10	2326.01	-0.150673	0.084797	-1.77687	0.0755904	0.235431	5	X-Z	CPSF6 Knock-out
BEST4	103.798	0.351358	0.359476	0.977416	0.328363	0.597513	5	X-Z	CPSF6 Knock-out
DHRS12	346.285	-0.0130637	0.203616	-0.0641586	0.948844	0.980705	5	X-Z	CPSF6 Knock-out
SCRN1	598.097	-0.419175	0.177231	-2.36514	0.0180233	0.0813248	5	X-Z	CPSF6 Knock-out
RP11-429E11.3	35.7483	0.728016	0.649295	1.12124	0.262186	0.52586	5	X-Z	CPSF6 Knock-out
PPP1R3F	1052.19	0.188876	0.118593	1.59264	0.11124	0.307676	5	X-Z	CPSF6 Knock-out
RIPPLY3	30.4054	-0.732916	0.74781	-0.980082	0.327045	0.596065	5	X-Z	CPSF6 Knock-out
NEURL4	4433.4	-0.00780792	0.0638461	-0.122293	0.902667	0.961475	5	X-Z	CPSF6 Knock-out
TRIM4	4495.76	-0.209899	0.0682795	-3.07412	0.00211125	0.0143747	5	X-Z	CPSF6 Knock-out
UPF3BP1	45.6095	0.626295	0.58014	1.07956	0.280339	0.546416	5	X-Z	CPSF6 Knock-out
SSR4P1	101.308	0.439437	0.375732	1.16955	0.242183	0.500895	5	X-Z	CPSF6 Knock-out
RFC2	9959.08	0.13418	0.0466592	2.87574	0.00403076	0.0247464	5	X-Z	CPSF6 Knock-out
TTC22	471.734	0.0635947	0.177005	0.359282	0.719384	0.874415	5	X-Z	CPSF6 Knock-out
SORBS1	246.978	0.74515	0.270958	2.75006	0.00595851	0.0339326	5	X-Z	CPSF6 Knock-out
BEND3P1	91.5246	-0.843378	0.544296	-1.54948	0.121265	0.324907	5	X-Z	CPSF6 Knock-out
FANCB	1473.71	0.0933927	0.118369	0.788996	0.430114	0.688615	5	X-Z	CPSF6 Knock-out
RP11-16E12.1	34.8598	-0.687646	0.823179	-0.835355	0.403518	0.667879	5	X-Z	CPSF6 Knock-out
POLR2M	4642.69	-0.525909	0.0637849	-8.24504	1.65098e-16	1.28797e-14	5	X-Z	CPSF6 Knock-out
CEBPB-AS1	98.3581	-0.00796627	0.385704	-0.0206538	0.983522	0.994944	5	X-Z	CPSF6 Knock-out
RP11-104L21.3	11.8317	0.682982	1.06131	0.643526	0.519883	NA	5	X-Z	CPSF6 Knock-out
CTA-292E10.6	53.0929	0.128129	0.502412	0.255027	0.798702	0.915381	5	X-Z	CPSF6 Knock-out
CCDC121	31.1395	-0.502247	0.721748	-0.695876	0.486506	0.733977	5	X-Z	CPSF6 Knock-out
C9orf47	10.5393	-1.37021	1.30406	-1.05073	0.293385	NA	5	X-Z	CPSF6 Knock-out
ARRDC1	3073.44	0.166905	0.0719103	2.32101	0.020286	0.0888916	5	X-Z	CPSF6 Knock-out
LRFN4	1345.81	0.1408	0.109855	1.28169	0.199951	0.446741	5	X-Z	CPSF6 Knock-out
RP11-361M10.3	9.52106	0.242877	1.63568	0.148487	0.881959	NA	5	X-Z	CPSF6 Knock-out
TBL2	3851.29	0.110064	0.0663698	1.65834	0.0972487	0.281409	5	X-Z	CPSF6 Knock-out
GS1-124K5.11	652.057	-0.347484	0.147534	-2.35527	0.0185091	0.0829386	5	X-Z	CPSF6 Knock-out
RP11-503N18.5	46.9208	0.283888	0.545333	0.520577	0.602661	0.811162	5	X-Z	CPSF6 Knock-out
RFPL3S	83.4338	-0.698085	0.448258	-1.55733	0.119392	0.322513	5	X-Z	CPSF6 Knock-out
MOGS	8192.49	-0.0289422	0.0502856	-0.575557	0.564915	0.787403	5	X-Z	CPSF6 Knock-out
RP11-25K19.1	55.5063	-0.457161	0.49676	-0.920285	0.357424	0.624702	5	X-Z	CPSF6 Knock-out
EIF4E3	5422.55	-0.117416	0.0573313	-2.04802	0.0405578	0.150523	5	X-Z	CPSF6 Knock-out
SMYD2	6276.39	0.0400224	0.0564325	0.709208	0.478196	0.727589	5	X-Z	CPSF6 Knock-out
PMS1	4153.67	-0.00125414	0.0663321	-0.0189071	0.984915	0.995524	5	X-Z	CPSF6 Knock-out
VASH2	65.2977	-0.225642	0.508337	-0.443882	0.657128	0.844506	5	X-Z	CPSF6 Knock-out
COX6A1	10668.6	-0.0433094	0.0518087	-0.835948	0.403184	0.667792	5	X-Z	CPSF6 Knock-out
AC017002.1	660.965	0.734749	0.157977	4.65099	3.30342e-06	5.312e-05	5	X-Z	CPSF6 Knock-out
NPM1P9	56.2491	0.123712	0.501417	0.246724	0.805122	0.918624	5	X-Z	CPSF6 Knock-out
CCDC77	2489.18	-0.114323	0.0794097	-1.43967	0.149962	0.373025	5	X-Z	CPSF6 Knock-out
TRAP1	21316.6	-0.00440402	0.0390794	-0.112694	0.910273	0.965019	5	X-Z	CPSF6 Knock-out
KBTBD3	421.829	-0.414472	0.182681	-2.26883	0.0232788	0.0987961	5	X-Z	CPSF6 Knock-out
ARID5A	40762.2	0.210165	0.0464871	4.52093	6.15672e-06	9.13233e-05	5	X-Z	CPSF6 Knock-out
BRWD1-AS2	12.5779	0.929513	1.17379	0.791889	0.428425	NA	5	X-Z	CPSF6 Knock-out
PAK4	1630.72	0.0873156	0.112718	0.77464	0.438552	0.696271	5	X-Z	CPSF6 Knock-out
RP3-395M20.8	4929.08	-0.0234496	0.0623492	-0.376102	0.706841	0.869452	5	X-Z	CPSF6 Knock-out
PROZ	46.532	-0.672069	0.641918	-1.04697	0.295114	0.562846	5	X-Z	CPSF6 Knock-out
GRIK1	8.62414	-0.447967	1.38734	-0.322896	0.746774	NA	5	X-Z	CPSF6 Knock-out
EMC2	2557.67	-0.0996295	0.0774366	-1.28659	0.198236	0.444547	5	X-Z	CPSF6 Knock-out
CCNH	4148.24	0.00905852	0.073539	0.12318	0.901965	0.961248	5	X-Z	CPSF6 Knock-out
PVRL3	1001.04	-0.0418307	0.128269	-0.326117	0.744336	0.887365	5	X-Z	CPSF6 Knock-out
RP11-7F17.5	10.4625	0.998266	1.10276	0.905239	0.365339	NA	5	X-Z	CPSF6 Knock-out
EEF1E1	3339.25	-0.151049	0.0874869	-1.72654	0.0842511	0.254177	5	X-Z	CPSF6 Knock-out
RP11-12M9.3	81.738	-0.134464	0.41521	-0.323847	0.746054	0.888415	5	X-Z	CPSF6 Knock-out
FAM69B	132.502	-0.44487	0.322993	-1.37734	0.168408	0.401188	5	X-Z	CPSF6 Knock-out
MPI	12530.5	-0.0808799	0.045626	-1.77267	0.0762831	0.236751	5	X-Z	CPSF6 Knock-out
SULF2	441.498	0.416661	0.204404	2.03841	0.0415086	0.153154	5	X-Z	CPSF6 Knock-out
RP11-885L14.1	22.178	-0.0356917	0.794881	-0.044902	0.964185	0.986029	5	X-Z	CPSF6 Knock-out
MMP23B	13.5081	0.74244	1.11545	0.665599	0.505667	NA	5	X-Z	CPSF6 Knock-out
RP11-216B9.9	22.1987	-1.1819	0.818558	-1.44388	0.148773	0.370977	5	X-Z	CPSF6 Knock-out
RP11-666O2.5	9.75964	-0.484418	1.16943	-0.414236	0.678701	NA	5	X-Z	CPSF6 Knock-out
F5	17354.6	-0.0305838	0.053843	-0.568017	0.570023	0.790174	5	X-Z	CPSF6 Knock-out
ZNHIT3	5110.57	-0.0765213	0.065051	-1.17633	0.239464	0.497709	5	X-Z	CPSF6 Knock-out
RAD54L2	7035.08	0.0132813	0.0518497	0.256149	0.797835	0.914858	5	X-Z	CPSF6 Knock-out
KPNA4	9372.71	0.0873381	0.0580086	1.50561	0.132168	0.343002	5	X-Z	CPSF6 Knock-out
TNFRSF10D	695.141	0.396627	0.15532	2.55361	0.0106612	0.0542271	5	X-Z	CPSF6 Knock-out
USP53	4452.28	-0.00806065	0.0643737	-0.125216	0.900352	0.960214	5	X-Z	CPSF6 Knock-out
AP003068.18	34.874	0.947843	0.628621	1.50781	0.131602	0.342288	5	X-Z	CPSF6 Knock-out
RSPH3	1862.49	-0.732442	0.0984817	-7.43734	1.02731e-13	5.88657e-12	5	X-Z	CPSF6 Knock-out
AGAP10P	172.36	-0.108167	0.278953	-0.387762	0.698192	0.86501	5	X-Z	CPSF6 Knock-out
MAP4K1	17185.4	-0.00157278	0.0400146	-0.0393053	0.968647	0.987841	5	X-Z	CPSF6 Knock-out
PMS2P6	167.799	0.147917	0.312313	0.473618	0.635773	0.831386	5	X-Z	CPSF6 Knock-out
RP11-574K11.31	1017.03	-0.120918	0.155243	-0.7789	0.436039	0.693584	5	X-Z	CPSF6 Knock-out
HPS6	3125.53	0.122308	0.0716442	1.70716	0.0877917	0.261527	5	X-Z	CPSF6 Knock-out
NTN3	7.9217	4.14363	1.66917	2.48245	0.0130482	NA	5	X-Z	CPSF6 Knock-out
MIR4258	13.3327	0.0960125	0.984803	0.0974941	0.922334	NA	5	X-Z	CPSF6 Knock-out
RP4-730K3.3	31.5354	-1.42178	0.662775	-2.1452	0.031937	0.125939	5	X-Z	CPSF6 Knock-out
MYO18A	14155.7	-0.041522	0.0449343	-0.92406	0.355455	0.622439	5	X-Z	CPSF6 Knock-out
UBE2FP3	14.1971	-1.1298	0.958866	-1.17827	0.23869	NA	5	X-Z	CPSF6 Knock-out
PYCRL	782.803	0.268228	0.134055	2.00088	0.0454054	0.163242	5	X-Z	CPSF6 Knock-out
CTD-2012K14.7	18.2578	0.97831	0.905041	1.08096	0.279717	0.545532	5	X-Z	CPSF6 Knock-out
TRADD	2442.73	-0.0880108	0.0971029	-0.906367	0.364742	0.630909	5	X-Z	CPSF6 Knock-out
PRRC1	5034.08	-0.168627	0.0613171	-2.75008	0.0059581	0.0339326	5	X-Z	CPSF6 Knock-out
MRS2	3190.6	-0.00549624	0.0706668	-0.0777768	0.938006	0.976331	5	X-Z	CPSF6 Knock-out
TMEM198B	1500.68	-0.0930318	0.115455	-0.805784	0.420367	0.680924	5	X-Z	CPSF6 Knock-out
SLC35E3	1674.31	-0.321933	0.101569	-3.16961	0.00152643	0.0109981	5	X-Z	CPSF6 Knock-out
RP11-545E17.3	680.507	0.277766	0.152519	1.82119	0.0685774	0.22044	5	X-Z	CPSF6 Knock-out
RP11-360N9.2	13.3203	0.764653	1.04207	0.73378	0.463083	NA	5	X-Z	CPSF6 Knock-out
RP3-508I15.10	13.4699	0.292276	1.00068	0.292078	0.770227	NA	5	X-Z	CPSF6 Knock-out
ERMP1	4639.85	-0.237942	0.0702259	-3.38824	0.000703421	0.0057484	5	X-Z	CPSF6 Knock-out
WDR36	10527.2	0.164226	0.0483069	3.39965	0.00067473	0.00555601	5	X-Z	CPSF6 Knock-out
RPS25	74563.2	-0.0188238	0.0328421	-0.573159	0.566537	0.788214	5	X-Z	CPSF6 Knock-out
LINC00174	264.485	0.491532	0.226552	2.16962	0.0300354	0.120222	5	X-Z	CPSF6 Knock-out
MRPL38	3966.09	0.0450251	0.0691831	0.650811	0.515169	0.753834	5	X-Z	CPSF6 Knock-out
CCDC102B	138.833	-0.132585	0.313618	-0.42276	0.67247	0.851583	5	X-Z	CPSF6 Knock-out
KLHL26	1253.42	0.0883817	0.109109	0.810033	0.417921	0.679057	5	X-Z	CPSF6 Knock-out
CFL1	109485	0.0475237	0.0311042	1.52789	0.12654	0.333928	5	X-Z	CPSF6 Knock-out
BISPR	1284.97	-0.314778	0.128792	-2.44408	0.0145221	0.0690375	5	X-Z	CPSF6 Knock-out
LINC00657	11764.5	-0.427322	0.051431	-8.30865	9.67962e-17	7.7697e-15	5	X-Z	CPSF6 Knock-out
RAP2C	7860.63	-0.522284	0.0522711	-9.99182	1.65511e-23	2.29646e-21	5	X-Z	CPSF6 Knock-out
TCF7	12324.1	0.110283	0.0510246	2.16137	0.030667	0.122296	5	X-Z	CPSF6 Knock-out
GGTLC2	173.889	0.127013	0.279291	0.454771	0.649274	0.839914	5	X-Z	CPSF6 Knock-out
RP4-545L17.12	10.6498	-1.03556	1.61063	-0.642952	0.520255	NA	5	X-Z	CPSF6 Knock-out
TFAP2E	97.0629	-0.895384	0.421234	-2.12562	0.0335349	0.130231	5	X-Z	CPSF6 Knock-out
SNX5	17855	0.0444923	0.0419454	1.06072	0.288817	0.556298	5	X-Z	CPSF6 Knock-out
IRAK1BP1	428.354	-0.640023	0.230101	-2.78149	0.00541105	0.0314552	5	X-Z	CPSF6 Knock-out
COL6A2	1766.14	0.241448	0.0956351	2.52468	0.0115803	0.0579405	5	X-Z	CPSF6 Knock-out
VPS51	8545.45	0.00710262	0.0693551	0.102409	0.918432	0.96899	5	X-Z	CPSF6 Knock-out
TSC22D1	523.787	-0.0704439	0.178182	-0.395349	0.692585	0.8629	5	X-Z	CPSF6 Knock-out
R3HCC1	1853.06	-0.0524941	0.0938178	-0.559533	0.575798	0.793318	5	X-Z	CPSF6 Knock-out
FAM86JP	143.769	-0.0969669	0.316638	-0.306239	0.759423	0.896088	5	X-Z	CPSF6 Knock-out
PDK2	938.378	0.343197	0.128579	2.66914	0.00760448	0.0411812	5	X-Z	CPSF6 Knock-out
LZTS2	2991.72	0.099358	0.0743264	1.33678	0.181294	0.420897	5	X-Z	CPSF6 Knock-out
TSSC1	4157.37	0.0200749	0.0632268	0.317506	0.75086	0.89128	5	X-Z	CPSF6 Knock-out
RP11-43F13.1	761.267	-0.283057	0.158717	-1.78341	0.0745198	0.233137	5	X-Z	CPSF6 Knock-out
MPHOSPH9	8252.58	0.0549248	0.0544832	1.0081	0.313405	0.581682	5	X-Z	CPSF6 Knock-out
CEP162	1614.39	-0.0926233	0.11643	-0.79553	0.426305	0.685228	5	X-Z	CPSF6 Knock-out
ITIH4	140.829	-2.06308	0.405715	-5.08506	3.67518e-07	7.35983e-06	5	X-Z	CPSF6 Knock-out
EFNA1	78.0658	-0.0277953	0.505977	-0.0549339	0.956191	0.982752	5	X-Z	CPSF6 Knock-out
KRTCAP3	88.548	-1.23694	0.426904	-2.89745	0.00376204	0.0233848	5	X-Z	CPSF6 Knock-out
LINC00667	1054.28	-0.496176	0.13214	-3.75493	0.000173389	0.00172016	5	X-Z	CPSF6 Knock-out
PIBF1	3068.65	0.255618	0.0759076	3.36749	0.000758554	0.00610808	5	X-Z	CPSF6 Knock-out
SLC9A3	663.111	0.252963	0.146873	1.72233	0.0850102	0.255776	5	X-Z	CPSF6 Knock-out
LA16c-349E10.1	7.25966	-0.732696	1.33312	-0.54961	0.582587	NA	5	X-Z	CPSF6 Knock-out
AC005154.6	1958.18	-0.155986	0.0881672	-1.7692	0.0768597	0.237992	5	X-Z	CPSF6 Knock-out
C17orf58	1653.29	-0.047918	0.100657	-0.476051	0.634038	0.830436	5	X-Z	CPSF6 Knock-out
TPTEP1	65.4299	0.80735	0.524432	1.53947	0.123689	0.329266	5	X-Z	CPSF6 Knock-out
GLS	30955.3	-0.158056	0.043663	-3.6199	0.000294721	0.00272798	5	X-Z	CPSF6 Knock-out
DOCK11	12689.6	0.0888483	0.0457901	1.94034	0.0523386	0.180646	5	X-Z	CPSF6 Knock-out
TMEM184B	3286.31	0.133302	0.0717505	1.85786	0.0631892	0.20713	5	X-Z	CPSF6 Knock-out
PLCB2	9457.6	-0.0395179	0.0517723	-0.763302	0.445283	0.701357	5	X-Z	CPSF6 Knock-out
ORAI3	1968.54	-0.0329154	0.089711	-0.366905	0.71369	0.872462	5	X-Z	CPSF6 Knock-out
AAK1	27339.8	0.0663148	0.0372125	1.78206	0.07474	0.233525	5	X-Z	CPSF6 Knock-out
CAPN10	2662.95	0.185696	0.0781946	2.37479	0.017559	0.0796925	5	X-Z	CPSF6 Knock-out
AC009506.1	12.5877	0.246556	1.15385	0.213681	0.830796	NA	5	X-Z	CPSF6 Knock-out
MTFMT	1364.15	0.157111	0.10429	1.50648	0.131944	0.342575	5	X-Z	CPSF6 Knock-out
ZNF704	252.881	0.0287582	0.271135	0.106066	0.91553	0.96762	5	X-Z	CPSF6 Knock-out
CORO1A	135738	-0.137205	0.031646	-4.33563	1.4534e-05	0.000197844	5	X-Z	CPSF6 Knock-out
SLC25A5-AS1	62.2478	0.472156	0.462658	1.02053	0.307477	0.575736	5	X-Z	CPSF6 Knock-out
ATG14	1627.72	-0.230672	0.122513	-1.88283	0.0597228	0.198991	5	X-Z	CPSF6 Knock-out
SCARNA15	177.635	0.346808	0.323851	1.07089	0.284221	0.550503	5	X-Z	CPSF6 Knock-out
IKZF4	3791.22	-0.00973803	0.0732207	-0.132996	0.894197	0.957528	5	X-Z	CPSF6 Knock-out
OGFOD2	1615.09	-0.132876	0.103635	-1.28215	0.199789	0.44668	5	X-Z	CPSF6 Knock-out
RP11-266L9.8	13.4505	-0.899792	1.17243	-0.767459	0.442808	NA	5	X-Z	CPSF6 Knock-out
DOC2A	28.2255	-0.345857	0.81983	-0.421865	0.673124	0.851598	5	X-Z	CPSF6 Knock-out
PLAC9	15.5798	-2.18798	1.18829	-1.84128	0.065581	0.213278	5	X-Z	CPSF6 Knock-out
PRKRIP1	5926.85	-0.0962134	0.0585072	-1.64447	0.100079	0.286427	5	X-Z	CPSF6 Knock-out
NFE2L1	21055.8	0.0966906	0.0404982	2.38753	0.016962	0.0776178	5	X-Z	CPSF6 Knock-out
BDH2	1373.39	-0.0633691	0.112551	-0.563027	0.573417	0.79222	5	X-Z	CPSF6 Knock-out
RPL9P9	39905.8	-0.0182209	0.0356548	-0.511037	0.609325	0.814786	5	X-Z	CPSF6 Knock-out
SLITRK5	13.2357	-0.636065	1.27115	-0.500384	0.616805	NA	5	X-Z	CPSF6 Knock-out
SIPA1L1	15678.8	0.125907	0.0427896	2.94246	0.00325621	0.0207519	5	X-Z	CPSF6 Knock-out
RP11-395A13.2	23.2913	0.319583	0.763672	0.418483	0.675594	0.853448	5	X-Z	CPSF6 Knock-out
RP11-286N22.8	204.727	0.221107	0.426421	0.518518	0.604097	0.811969	5	X-Z	CPSF6 Knock-out
SYT2	27.8832	-0.0226194	0.728866	-0.0310337	0.975243	0.991314	5	X-Z	CPSF6 Knock-out
TRAF2	6081.86	0.0996311	0.0573313	1.73781	0.0822439	0.249936	5	X-Z	CPSF6 Knock-out
RP1-149A16.3	60.8474	-0.615191	0.468944	-1.31186	0.189566	0.432603	5	X-Z	CPSF6 Knock-out
BAHCC1	26.9072	0.186409	0.842613	0.221227	0.824916	0.927636	5	X-Z	CPSF6 Knock-out
TMEM170A	2603.44	-0.835166	0.0817301	-10.2186	1.63701e-24	2.58527e-22	5	X-Z	CPSF6 Knock-out
HMGCS1	21702.5	1.18983	0.122259	9.732	2.2021e-22	2.8142e-20	5	X-Z	CPSF6 Knock-out
PHF6	7067.75	-1.0853	0.0731074	-14.8453	7.45817e-50	6.29891e-47	5	X-Z	CPSF6 Knock-out
AFG3L2	11955.1	0.0323097	0.0447874	0.721401	0.470663	0.721368	5	X-Z	CPSF6 Knock-out
PARP10	7368.45	-0.274893	0.0638887	-4.30268	1.68745e-05	0.000224974	5	X-Z	CPSF6 Knock-out
PDCL	4449.09	0.252786	0.0688959	3.6691	0.000243405	0.00230192	5	X-Z	CPSF6 Knock-out
ZNF500	1528.71	0.00213715	0.118195	0.0180815	0.985574	0.995664	5	X-Z	CPSF6 Knock-out
SLC39A9	6775.48	-0.0118245	0.0535949	-0.220627	0.825383	0.927659	5	X-Z	CPSF6 Knock-out
SLC30A4	353.788	0.318753	0.20744	1.5366	0.124391	0.330546	5	X-Z	CPSF6 Knock-out
MIR6783	20.8177	1.01777	0.82588	1.23234	0.217821	0.470182	5	X-Z	CPSF6 Knock-out
PCOLCE-AS1	79.3088	-0.158283	0.447801	-0.353467	0.723738	0.876691	5	X-Z	CPSF6 Knock-out
RP4-631H13.6	34.8114	-0.139507	0.637753	-0.218747	0.826847	0.928249	5	X-Z	CPSF6 Knock-out
U52111.14	15.1019	0.438844	0.938161	0.467771	0.639949	0.834453	5	X-Z	CPSF6 Knock-out
C11orf71	164.572	-0.312579	0.293405	-1.06535	0.286718	0.553768	5	X-Z	CPSF6 Knock-out
GLTSCR2-AS1	32.9704	-1.10515	0.690557	-1.60037	0.109516	0.304516	5	X-Z	CPSF6 Knock-out
MB	514.296	0.828221	0.171214	4.83733	1.31593e-06	2.32805e-05	5	X-Z	CPSF6 Knock-out
TYMS	39249.2	-0.109295	0.0366733	-2.98022	0.00288041	0.018688	5	X-Z	CPSF6 Knock-out
AMOTL1	773.613	0.072475	0.150594	0.481261	0.630331	0.827756	5	X-Z	CPSF6 Knock-out
DCAF4	793.92	-0.0501226	0.135847	-0.368963	0.712155	0.871706	5	X-Z	CPSF6 Knock-out
MAP3K8	2164.69	0.182174	0.0853438	2.13459	0.0327945	0.128408	5	X-Z	CPSF6 Knock-out
EIF2S3L	1997.67	-0.141848	0.0884944	-1.6029	0.108956	0.303436	5	X-Z	CPSF6 Knock-out
AC005785.2	16.0474	-0.102069	0.930476	-0.109695	0.912651	0.965854	5	X-Z	CPSF6 Knock-out
CTD-3065J16.9	32.3035	-0.372181	0.804102	-0.462853	0.64347	0.83692	5	X-Z	CPSF6 Knock-out
CTD-2260A17.2	66.4273	0.399622	0.470077	0.850121	0.395258	0.659782	5	X-Z	CPSF6 Knock-out
FAM156A	2774.68	-0.0211853	0.0785097	-0.269843	0.787281	0.909914	5	X-Z	CPSF6 Knock-out
INSIG2	11227.5	-0.696062	0.0499243	-13.9424	3.50123e-44	1.83815e-41	5	X-Z	CPSF6 Knock-out
RPS20P4	10.3861	-1.25552	1.22886	-1.02169	0.306927	NA	5	X-Z	CPSF6 Knock-out
RPS12P26	18.7907	0.443125	0.880879	0.503048	0.614931	0.818561	5	X-Z	CPSF6 Knock-out
CTD-2330K9.3	47.8368	1.13882	0.535323	2.12735	0.0333913	0.129867	5	X-Z	CPSF6 Knock-out
GFM1	7148.85	0.212108	0.052463	4.043	5.27725e-05	0.000618279	5	X-Z	CPSF6 Knock-out
RP11-53B2.2	191.799	0.318536	0.264548	1.20408	0.22856	0.484216	5	X-Z	CPSF6 Knock-out
KRT17P2	28.4171	-0.538584	0.90787	-0.593239	0.553021	0.77996	5	X-Z	CPSF6 Knock-out
AC007228.11	37.2347	0.278492	0.602243	0.462424	0.643777	0.837155	5	X-Z	CPSF6 Knock-out
FAM160A2	2016	-0.0953138	0.0880083	-1.08301	0.278805	0.544709	5	X-Z	CPSF6 Knock-out
BAX	18197.1	0.194047	0.0436202	4.44855	8.64536e-06	0.000123392	5	X-Z	CPSF6 Knock-out
PML	10275.7	-0.140274	0.0457975	-3.06292	0.0021919	0.0148406	5	X-Z	CPSF6 Knock-out
RP11-712L6.5	52.6302	-0.235574	0.500062	-0.47109	0.637576	0.832488	5	X-Z	CPSF6 Knock-out
PSME2	23345.9	-0.0693084	0.0370809	-1.86911	0.0616072	0.203475	5	X-Z	CPSF6 Knock-out
SNORD100	25.1317	-0.649849	0.781366	-0.831683	0.405588	0.668874	5	X-Z	CPSF6 Knock-out
MRPS27	10248.3	-0.234094	0.049415	-4.73732	2.16567e-06	3.64226e-05	5	X-Z	CPSF6 Knock-out
E2F6	1026.2	0.180988	0.143111	1.26467	0.205989	0.454129	5	X-Z	CPSF6 Knock-out
TMEM240	9.80228	1.05488	1.63759	0.644163	0.51947	NA	5	X-Z	CPSF6 Knock-out
STBD1	168.408	0.113345	0.302558	0.374622	0.707942	0.870042	5	X-Z	CPSF6 Knock-out
EIF4EP2	1039.74	0.169527	0.11875	1.42759	0.153409	0.378505	5	X-Z	CPSF6 Knock-out
SMC3	30397.7	0.0119811	0.0423233	0.283087	0.77711	0.904311	5	X-Z	CPSF6 Knock-out
UFL1	4680.91	-0.0638543	0.0730826	-0.873728	0.382266	0.64733	5	X-Z	CPSF6 Knock-out
SS18L1	2369.16	-0.079988	0.0817325	-0.978656	0.32775	0.596836	5	X-Z	CPSF6 Knock-out
C2orf74	847.24	-0.0148267	0.16895	-0.0877584	0.930069	0.973625	5	X-Z	CPSF6 Knock-out
CNFN	14.9252	0.554822	1.09592	0.506264	0.612672	0.817121	5	X-Z	CPSF6 Knock-out
PHF24	27.4898	-0.910309	0.747559	-1.21771	0.223335	0.478047	5	X-Z	CPSF6 Knock-out
LGALS9C	28.9591	0.481862	0.791193	0.609032	0.542503	0.773561	5	X-Z	CPSF6 Knock-out
TTC23	223.345	-0.13882	0.260699	-0.53249	0.594387	0.80585	5	X-Z	CPSF6 Knock-out
CCNE1	3526.49	0.0401756	0.0786067	0.511096	0.609284	0.814786	5	X-Z	CPSF6 Knock-out
AP001046.5	1480.57	0.197427	0.101765	1.94003	0.0523766	0.180745	5	X-Z	CPSF6 Knock-out
RP11-554J4.1	52.1921	1.50837	0.527418	2.8599	0.0042377	0.0257644	5	X-Z	CPSF6 Knock-out
MSI2	9058.19	-0.23062	0.0519362	-4.44045	8.97703e-06	0.000127563	5	X-Z	CPSF6 Knock-out
ACBD5	4435.78	-0.132542	0.0622491	-2.12921	0.0332366	0.129409	5	X-Z	CPSF6 Knock-out
RP11-287D1.3	139.799	-0.422471	0.4729	-0.893361	0.371664	0.637152	5	X-Z	CPSF6 Knock-out
AGPAT4-IT1	84.5397	-0.241014	0.398674	-0.60454	0.545485	0.775453	5	X-Z	CPSF6 Knock-out
CPT1C	367.146	-0.0977908	0.196836	-0.496814	0.61932	0.821863	5	X-Z	CPSF6 Knock-out
CSPG4P12	531.906	-0.00604033	0.164075	-0.0368144	0.970633	0.988858	5	X-Z	CPSF6 Knock-out
ZNF488	15.6876	-0.458434	0.901055	-0.508774	0.61091	0.815877	5	X-Z	CPSF6 Knock-out
RP11-144L1.8	21.6619	-0.161211	0.773708	-0.208361	0.834947	0.932291	5	X-Z	CPSF6 Knock-out
SLC16A2	1047.57	0.340611	0.137557	2.47614	0.0132813	0.0643203	5	X-Z	CPSF6 Knock-out
SLC35E2B	7100.7	-0.229861	0.0625595	-3.67428	0.00023852	0.00226786	5	X-Z	CPSF6 Knock-out
C1orf204	13.9731	-1.4577	1.18573	-1.22937	0.218935	NA	5	X-Z	CPSF6 Knock-out
ZDHHC4	1791.91	0.0669211	0.100775	0.664065	0.506649	0.748643	5	X-Z	CPSF6 Knock-out
TTL	5345.98	-0.136049	0.0604053	-2.25227	0.0243053	0.102126	5	X-Z	CPSF6 Knock-out
SCMH1	3254.14	0.0609367	0.0713478	0.854079	0.393061	0.657356	5	X-Z	CPSF6 Knock-out
PRH2	12.6666	0.513698	0.99581	0.51586	0.605952	NA	5	X-Z	CPSF6 Knock-out
XXYLT1-AS2	24.8041	0.468819	0.757082	0.619245	0.535755	0.768785	5	X-Z	CPSF6 Knock-out
PPIP5K1	2427.52	0.297746	0.0904396	3.29221	0.00099405	0.00768687	5	X-Z	CPSF6 Knock-out
AIF1L	478.329	-0.255954	0.181013	-1.41401	0.157359	0.384105	5	X-Z	CPSF6 Knock-out
SLC26A10	8.17609	0.0793231	1.33072	0.059609	0.952467	NA	5	X-Z	CPSF6 Knock-out
ANAPC4	4186.53	-0.138392	0.0671975	-2.05949	0.0394475	0.147359	5	X-Z	CPSF6 Knock-out
UBTF	24629.7	-0.0397099	0.0371618	-1.06857	0.285265	0.551853	5	X-Z	CPSF6 Knock-out
PITPNA	6391	-0.0973567	0.0578559	-1.68274	0.0924248	0.271653	5	X-Z	CPSF6 Knock-out
FAM189B	4960.88	0.0452798	0.0723151	0.626145	0.53122	0.765444	5	X-Z	CPSF6 Knock-out
RNA5-8S5	51.6364	0.291323	0.506968	0.574637	0.565537	0.787777	5	X-Z	CPSF6 Knock-out
DBN1	3553.15	0.367218	0.0732807	5.01111	5.41162e-07	1.04598e-05	5	X-Z	CPSF6 Knock-out
RP11-44N11.1	8.14293	3.7947	1.47593	2.57106	0.0101389	NA	5	X-Z	CPSF6 Knock-out
AC008079.10	316.498	-0.00921609	0.212395	-0.0433913	0.96539	0.986431	5	X-Z	CPSF6 Knock-out
CCDC88B	16799.7	-0.0804414	0.0587251	-1.3698	0.170751	0.404832	5	X-Z	CPSF6 Knock-out
AC005954.4	6.8135	-3.16622	1.8006	-1.75843	0.0786746	NA	5	X-Z	CPSF6 Knock-out
KCNN1	32.2472	-0.299676	0.687789	-0.435709	0.663048	0.848426	5	X-Z	CPSF6 Knock-out
RP11-973H7.1	53.1603	-0.262657	0.538831	-0.487458	0.625934	0.825386	5	X-Z	CPSF6 Knock-out
ATG9A	10819.6	0.0857048	0.0457237	1.87441	0.0608742	0.201685	5	X-Z	CPSF6 Knock-out
UTP3	6013.32	0.144162	0.0596359	2.41737	0.0156329	0.0728574	5	X-Z	CPSF6 Knock-out
PPP6R3	16646.2	-0.144643	0.0430374	-3.36087	0.000776985	0.0062243	5	X-Z	CPSF6 Knock-out
CTD-2649C14.2	123.034	0.420614	0.357526	1.17646	0.239412	0.497674	5	X-Z	CPSF6 Knock-out
RP11-304F15.3	14.8304	-1.30972	1.00709	-1.30051	0.193427	NA	5	X-Z	CPSF6 Knock-out
PSMD5	7218.65	-0.100155	0.059877	-1.67268	0.0943905	0.275637	5	X-Z	CPSF6 Knock-out
RP1-292L20.3	37.3024	0.950382	0.625372	1.51971	0.128585	0.337606	5	X-Z	CPSF6 Knock-out
PDCD11	19524.2	-0.0579581	0.0388091	-1.49342	0.135328	0.348455	5	X-Z	CPSF6 Knock-out
COL23A1	8.17763	0.104553	1.68763	0.0619524	0.950601	NA	5	X-Z	CPSF6 Knock-out
COL4A4	27.2446	0.456461	0.687805	0.663648	0.506915	0.748695	5	X-Z	CPSF6 Knock-out
SIAH2-AS1	30.8014	0.132035	0.653793	0.201953	0.839954	0.935111	5	X-Z	CPSF6 Knock-out
LIMS1-AS1	30.3901	-0.622582	0.721557	-0.862831	0.388231	0.652877	5	X-Z	CPSF6 Knock-out
ZNF483	140.19	-0.197722	0.311375	-0.634996	0.525431	0.761281	5	X-Z	CPSF6 Knock-out
RPS2P55	65.2719	-0.189632	0.45789	-0.414142	0.67877	0.855398	5	X-Z	CPSF6 Knock-out
POLD2	15015.8	0.0880933	0.042112	2.09188	0.0364489	0.139046	5	X-Z	CPSF6 Knock-out
EMC10	5679.81	0.0983518	0.0600338	1.63827	0.101364	0.288583	5	X-Z	CPSF6 Knock-out
AKIRIN1	7771.74	0.127699	0.0508489	2.51134	0.0120273	0.0596606	5	X-Z	CPSF6 Knock-out
CHRAC1	5149.46	0.0191378	0.0623958	0.306715	0.75906	0.895956	5	X-Z	CPSF6 Knock-out
TRBV29-1	575.152	0.116965	0.16053	0.728616	0.466237	0.718022	5	X-Z	CPSF6 Knock-out
GAL3ST2	47.6724	1.17487	0.62891	1.8681	0.0617483	0.203782	5	X-Z	CPSF6 Knock-out
KDM4A-AS1	162.348	0.797374	0.291989	2.73083	0.00631745	0.0355391	5	X-Z	CPSF6 Knock-out
RP11-488L18.4	5517.94	0.0454412	0.057708	0.787433	0.431028	0.689458	5	X-Z	CPSF6 Knock-out
AC004837.5	10.6425	-1.18964	1.28294	-0.927278	0.353782	NA	5	X-Z	CPSF6 Knock-out
RPL4P6	71.5338	0.214695	0.537858	0.399166	0.689771	0.861509	5	X-Z	CPSF6 Knock-out
NFYA	5451.8	0.027354	0.0569008	0.480731	0.630708	0.827916	5	X-Z	CPSF6 Knock-out
UNQ6494	592.914	0.156374	0.157687	0.991672	0.321357	0.589979	5	X-Z	CPSF6 Knock-out
LEAP2	207.258	-0.568075	0.282658	-2.00976	0.0444565	0.160661	5	X-Z	CPSF6 Knock-out
PTGES3	45604.5	-0.0136898	0.0381712	-0.358642	0.719863	0.874669	5	X-Z	CPSF6 Knock-out
DUSP12	1767.63	-0.00972105	0.0938702	-0.103558	0.91752	0.968818	5	X-Z	CPSF6 Knock-out
KIAA1551	15420.5	0.0781198	0.0440391	1.77388	0.0760836	0.236393	5	X-Z	CPSF6 Knock-out
SLC13A5	24.6778	-0.724304	0.750713	-0.964822	0.334634	0.603126	5	X-Z	CPSF6 Knock-out
AC010492.2	12.4076	0.018328	1.05434	0.0173834	0.986131	NA	5	X-Z	CPSF6 Knock-out
AC072062.1	69.106	-0.139832	0.466917	-0.29948	0.764574	0.89865	5	X-Z	CPSF6 Knock-out
HSPA8P5	48.3497	-0.380539	0.577256	-0.65922	0.509754	0.750434	5	X-Z	CPSF6 Knock-out
APOD	338.957	0.987163	0.214873	4.59417	4.34473e-06	6.77883e-05	5	X-Z	CPSF6 Knock-out
KMT2B	13329.4	0.0371623	0.0436327	0.851708	0.394376	0.658933	5	X-Z	CPSF6 Knock-out
CCR4	29689.4	0.0223286	0.0431242	0.517774	0.604616	0.812386	5	X-Z	CPSF6 Knock-out
TBC1D16	898.774	-0.281219	0.137458	-2.04585	0.0407711	0.151112	5	X-Z	CPSF6 Knock-out
POLQ	9111.13	-0.133446	0.0509318	-2.62009	0.00879062	0.0464394	5	X-Z	CPSF6 Knock-out
PLEKHG2	8104.22	0.164691	0.0525949	3.13131	0.00174031	0.0122528	5	X-Z	CPSF6 Knock-out
GUSBP11	2265.78	-0.55691	0.474092	-1.17469	0.240119	0.498438	5	X-Z	CPSF6 Knock-out
ANKS6	2171.78	-0.196285	0.0945418	-2.07617	0.037878	0.142981	5	X-Z	CPSF6 Knock-out
AC005253.2	639.64	-0.157333	0.150972	-1.04213	0.297351	0.565005	5	X-Z	CPSF6 Knock-out
PROCR	168.666	0.643935	0.338626	1.90161	0.0572217	0.192728	5	X-Z	CPSF6 Knock-out
BNIP3P17	21.1462	-0.654063	0.821241	-0.796432	0.425781	0.684895	5	X-Z	CPSF6 Knock-out
IGF2-AS	6.68296	-1.33946	1.90686	-0.702444	0.482402	NA	5	X-Z	CPSF6 Knock-out
BNIPL	137.751	0.425647	0.312425	1.3624	0.173072	0.408051	5	X-Z	CPSF6 Knock-out
ZNF720	1339.23	-0.534395	0.106621	-5.01212	5.38326e-07	1.04153e-05	5	X-Z	CPSF6 Knock-out
KIAA1024	233.974	-0.59839	0.274735	-2.17806	0.0294014	0.118294	5	X-Z	CPSF6 Knock-out
LINC01296	43.731	-0.0155214	0.583187	-0.0266147	0.978767	0.992674	5	X-Z	CPSF6 Knock-out
TNS2	231.946	0.268095	0.258446	1.03733	0.29958	0.567409	5	X-Z	CPSF6 Knock-out
EXOSC2	8073.26	-0.00890939	0.0501233	-0.177749	0.85892	0.943945	5	X-Z	CPSF6 Knock-out
RP11-433J8.1	89.2547	0.11805	0.393471	0.300022	0.76416	0.898441	5	X-Z	CPSF6 Knock-out
RP11-582E3.4	13.8518	1.04461	1.17041	0.892522	0.372113	NA	5	X-Z	CPSF6 Knock-out
MORN4	162.26	-0.58901	0.301646	-1.95265	0.0508606	0.176932	5	X-Z	CPSF6 Knock-out
SRGAP2	6385.22	-0.0469107	0.0630818	-0.743649	0.457089	0.711967	5	X-Z	CPSF6 Knock-out
RP11-303E16.8	9.03168	-4.20256	1.66373	-2.52599	0.0115372	NA	5	X-Z	CPSF6 Knock-out
PTPRE	3366.9	0.0999002	0.0690694	1.44637	0.148072	0.36942	5	X-Z	CPSF6 Knock-out
DDX26B	6539.66	-0.0675445	0.0622764	-1.08459	0.278103	0.543913	5	X-Z	CPSF6 Knock-out
CCDC9	3305.61	0.256201	0.0716635	3.57506	0.00035015	0.00316356	5	X-Z	CPSF6 Knock-out
SLC19A2	1729.7	0.132906	0.104278	1.27453	0.202476	0.449703	5	X-Z	CPSF6 Knock-out
TNFRSF18	5120.88	0.266595	0.0818162	3.25846	0.0011202	0.0084966	5	X-Z	CPSF6 Knock-out
YPEL1	141.172	-0.162644	0.356321	-0.456453	0.648064	0.839691	5	X-Z	CPSF6 Knock-out
CTB-120L21.1	8.9615	1.20001	1.39704	0.858971	0.390357	NA	5	X-Z	CPSF6 Knock-out
FGD4	41.4424	0.246306	0.604544	0.407425	0.683696	0.857551	5	X-Z	CPSF6 Knock-out
ISY1	10875.6	0.0379264	0.0534415	0.709682	0.477901	0.727412	5	X-Z	CPSF6 Knock-out
TLR2	141.387	0.482683	0.368578	1.30958	0.190337	0.433599	5	X-Z	CPSF6 Knock-out
GPR180	2330.94	-0.61301	0.100736	-6.08533	1.16255e-09	3.76375e-08	5	X-Z	CPSF6 Knock-out
PPP1R12A	17701	-0.1026	0.0430372	-2.384	0.0171257	0.0780725	5	X-Z	CPSF6 Knock-out
TNRC18	7677.93	0.0620864	0.0608592	1.02017	0.30765	0.575736	5	X-Z	CPSF6 Knock-out
NPM1P40	17.3399	0.202481	0.85459	0.236933	0.812708	0.922787	5	X-Z	CPSF6 Knock-out
SNORD15B	23.9739	-0.0932586	0.736523	-0.12662	0.899241	0.959972	5	X-Z	CPSF6 Knock-out
LARP4	6975.24	-0.0801814	0.0630525	-1.27166	0.203493	0.451041	5	X-Z	CPSF6 Knock-out
ITGB5	98.7423	0.13875	0.418582	0.331476	0.740285	0.885123	5	X-Z	CPSF6 Knock-out
DDX47	9456.94	0.0913125	0.0487693	1.87234	0.0611601	0.202357	5	X-Z	CPSF6 Knock-out
FAM174A	438.485	-0.0426376	0.198077	-0.215257	0.829567	0.929316	5	X-Z	CPSF6 Knock-out
COL5A3	289.546	0.545163	0.22726	2.39885	0.0164467	0.0759033	5	X-Z	CPSF6 Knock-out
USF1	4568.49	0.100816	0.0608738	1.65615	0.0976922	0.282223	5	X-Z	CPSF6 Knock-out
RAB34	1083.39	-0.121882	0.129777	-0.939163	0.347647	0.615704	5	X-Z	CPSF6 Knock-out
EME1	3757.63	-0.0208761	0.0838669	-0.24892	0.803423	0.918048	5	X-Z	CPSF6 Knock-out
PHACTR2P1	34.5741	-0.519112	0.628917	-0.825407	0.409141	0.6717	5	X-Z	CPSF6 Knock-out
CTD-2325P2.3	11.0047	-0.975039	1.32498	-0.735888	0.461799	NA	5	X-Z	CPSF6 Knock-out
SLC9A9	201.978	0.0710677	0.269788	0.26342	0.792227	0.912336	5	X-Z	CPSF6 Knock-out
FBXW9	674.962	-0.0853816	0.149795	-0.56999	0.568685	0.789453	5	X-Z	CPSF6 Knock-out
BCAR3	228.336	-0.115008	0.250291	-0.4595	0.645875	0.838477	5	X-Z	CPSF6 Knock-out
PRPF38AP1	101.811	-0.218584	0.367981	-0.594009	0.552506	0.779803	5	X-Z	CPSF6 Knock-out
JAK2	4420.25	-0.145323	0.0648038	-2.24251	0.0249282	0.104136	5	X-Z	CPSF6 Knock-out
TESPA1	13046.7	0.101768	0.0468831	2.17069	0.029955	0.120024	5	X-Z	CPSF6 Knock-out
RPS7	63776.6	-0.045669	0.0339686	-1.34445	0.178804	0.416459	5	X-Z	CPSF6 Knock-out
NUTM1	20.2781	-0.148246	0.833204	-0.177923	0.858783	0.943865	5	X-Z	CPSF6 Knock-out
PIK3CD	34948.2	0.0655178	0.0399785	1.63883	0.10125	0.288423	5	X-Z	CPSF6 Knock-out
ARSA	2548.66	0.344915	0.084798	4.06749	4.75223e-05	0.000564161	5	X-Z	CPSF6 Knock-out
MURC	67.1359	0.682822	0.494385	1.38116	0.167231	0.399516	5	X-Z	CPSF6 Knock-out
KCNAB3	293.502	-0.728248	0.217682	-3.34547	0.000821447	0.00652622	5	X-Z	CPSF6 Knock-out
CH17-472G23.1	87.3174	0.57191	0.409101	1.39797	0.162122	0.391575	5	X-Z	CPSF6 Knock-out
LGALS1	53243.5	-0.0755323	0.0331918	-2.27563	0.022868	0.0975215	5	X-Z	CPSF6 Knock-out
SMIM4	617.917	0.329431	0.171658	1.91911	0.0549702	0.187514	5	X-Z	CPSF6 Knock-out
FAM129A	10895.1	-0.298	0.0546683	-5.45106	5.00705e-08	1.19048e-06	5	X-Z	CPSF6 Knock-out
RUNX2	7599.56	-0.0898489	0.0531474	-1.69056	0.0909209	0.268288	5	X-Z	CPSF6 Knock-out
TUSC5	31.7737	0.0131322	0.652454	0.0201274	0.983942	0.995194	5	X-Z	CPSF6 Knock-out
CLHC1	256.07	-0.0408709	0.231113	-0.176844	0.859631	0.943969	5	X-Z	CPSF6 Knock-out
SNRPE	8262.89	-0.0455538	0.0519801	-0.87637	0.380829	0.646191	5	X-Z	CPSF6 Knock-out
LOXHD1	9.45706	0.745139	1.58636	0.469716	0.638558	NA	5	X-Z	CPSF6 Knock-out
FAM91A3P	70.7159	0.457107	0.433552	1.05433	0.291731	0.558974	5	X-Z	CPSF6 Knock-out
SRP54-AS1	180.212	0.127024	0.278937	0.455385	0.648832	0.839844	5	X-Z	CPSF6 Knock-out
MKRN2	4058.85	-0.0584893	0.0680941	-0.858948	0.390369	0.654866	5	X-Z	CPSF6 Knock-out
RAB9A	1852.13	-0.128319	0.105562	-1.21558	0.224147	0.478993	5	X-Z	CPSF6 Knock-out
AIFM1	8964.82	0.00635014	0.0500556	0.126862	0.89905	0.959972	5	X-Z	CPSF6 Knock-out
SEL1L	13243.2	-0.0497047	0.0443182	-1.12154	0.262058	0.525821	5	X-Z	CPSF6 Knock-out
ZBTB49	381.993	-0.266101	0.192665	-1.38116	0.16723	0.399516	5	X-Z	CPSF6 Knock-out
AC004951.6	172.763	-0.145132	0.279674	-0.518931	0.603809	0.811695	5	X-Z	CPSF6 Knock-out
TRAF3IP3	34352.6	0.0779754	0.036485	2.13719	0.0325826	0.127785	5	X-Z	CPSF6 Knock-out
FOXC1	12.1529	1.05068	1.07146	0.980612	0.326784	NA	5	X-Z	CPSF6 Knock-out
RP11-437B10.1	344.18	0.693995	0.228988	3.03071	0.00243979	0.0162416	5	X-Z	CPSF6 Knock-out
CRYL1	1287.77	-0.0482703	0.105502	-0.457531	0.64729	0.8393	5	X-Z	CPSF6 Knock-out
TM9SF2	10777.4	0.0579655	0.0515936	1.1235	0.261225	0.525025	5	X-Z	CPSF6 Knock-out
PCBP3	1504.5	0.134664	0.121364	1.10959	0.267176	0.531623	5	X-Z	CPSF6 Knock-out
MSL1	12554.3	-0.0311637	0.0433669	-0.718606	0.472384	0.723183	5	X-Z	CPSF6 Knock-out
TMEM185A	1270.07	-0.0514425	0.108375	-0.474673	0.63502	0.831286	5	X-Z	CPSF6 Knock-out
EIF3J	9080.78	-0.0526446	0.0475193	-1.10786	0.267924	0.532585	5	X-Z	CPSF6 Knock-out
RP5-1142A6.2	135.066	0.130554	0.440134	0.296622	0.766755	0.89949	5	X-Z	CPSF6 Knock-out
IRAK2	1214.08	0.215401	0.109738	1.96286	0.049662	0.174037	5	X-Z	CPSF6 Knock-out
PIK3C3	7858.87	-0.0762526	0.0654322	-1.16537	0.24387	0.502993	5	X-Z	CPSF6 Knock-out
GPR160	2586.96	-0.278929	0.0912885	-3.05547	0.0022471	0.015151	5	X-Z	CPSF6 Knock-out
AC004893.10	23.8536	-0.263633	0.839024	-0.314214	0.753358	0.892775	5	X-Z	CPSF6 Knock-out
RHOU	498.732	-0.137025	0.175712	-0.779825	0.435494	0.693399	5	X-Z	CPSF6 Knock-out
LINC00662	507.13	-0.299677	0.190431	-1.57368	0.115562	0.315451	5	X-Z	CPSF6 Knock-out
DGCR12	24.1343	0.386256	0.79334	0.486873	0.626348	0.825613	5	X-Z	CPSF6 Knock-out
PDPR	9966.51	-0.303177	0.0508816	-5.95847	2.54603e-09	7.70353e-08	5	X-Z	CPSF6 Knock-out
AVEN	1297.16	0.179708	0.111398	1.6132	0.106701	0.298766	5	X-Z	CPSF6 Knock-out
RP11-320L11.2	419.965	1.05309	0.208868	5.0419	4.60925e-07	8.99846e-06	5	X-Z	CPSF6 Knock-out
PRDX3	20150.8	-0.0365799	0.045721	-0.800069	0.423671	0.683424	5	X-Z	CPSF6 Knock-out
BRCC3P1	102.295	-0.0235246	0.383753	-0.0613014	0.951119	0.981328	5	X-Z	CPSF6 Knock-out
MRPS17	1633.14	-0.136964	0.106999	-1.28005	0.200529	0.447222	5	X-Z	CPSF6 Knock-out
CREBL2	5738.42	-0.15722	0.0564351	-2.78585	0.00533872	0.0310804	5	X-Z	CPSF6 Knock-out
MLLT11	1560.86	0.114395	0.116435	0.982481	0.325863	0.594859	5	X-Z	CPSF6 Knock-out
CTD-2336O2.1	437.799	0.29325	0.191395	1.53217	0.12548	0.332168	5	X-Z	CPSF6 Knock-out
CHRM5	19.7967	-1.31265	1.05631	-1.24268	0.213986	0.464954	5	X-Z	CPSF6 Knock-out
IL11RA	1483.3	-0.468022	0.127001	-3.68517	0.000228548	0.00219236	5	X-Z	CPSF6 Knock-out
SEMA4G	401.544	-0.079538	0.208084	-0.382239	0.702284	0.867503	5	X-Z	CPSF6 Knock-out
DLK2	280.429	-0.0239727	0.229384	-0.104509	0.916765	0.968199	5	X-Z	CPSF6 Knock-out
TMEM14A	1296.99	-0.123334	0.106718	-1.1557	0.247804	0.5083	5	X-Z	CPSF6 Knock-out
CD33	53.7264	-0.165767	0.553879	-0.299283	0.764724	0.898709	5	X-Z	CPSF6 Knock-out
ERICH1	4381.89	0.0671646	0.063311	1.06087	0.28875	0.556252	5	X-Z	CPSF6 Knock-out
RP11-203J24.9	1703.12	-0.526999	0.636647	-0.827772	0.4078	0.670746	5	X-Z	CPSF6 Knock-out
CTD-2292M16.8	53.0108	-2.14818	0.67517	-3.18168	0.00146421	0.0106366	5	X-Z	CPSF6 Knock-out
RNF157	5840.35	-0.164752	0.0727417	-2.26489	0.0235192	0.0995774	5	X-Z	CPSF6 Knock-out
LNP1	128.069	-0.0670239	0.325284	-0.206047	0.836754	0.933223	5	X-Z	CPSF6 Knock-out
COMMD6	2109.75	-0.195783	0.279853	-0.699591	0.484183	0.732154	5	X-Z	CPSF6 Knock-out
PPP3CB-AS1	314.579	-0.648083	0.214586	-3.02015	0.00252649	0.0167156	5	X-Z	CPSF6 Knock-out
RP11-100N21.1	33.616	0.26906	0.620487	0.433627	0.66456	0.848863	5	X-Z	CPSF6 Knock-out
HTR6	10.6574	0.392611	1.33734	0.293575	0.769083	NA	5	X-Z	CPSF6 Knock-out
INPP5E	1832.71	0.0179294	0.090728	0.197616	0.843345	0.936434	5	X-Z	CPSF6 Knock-out
CCDC30	145.465	-0.424495	0.312372	-1.35894	0.174165	0.409385	5	X-Z	CPSF6 Knock-out
SNX19P3	10.6707	0.998405	1.12819	0.884965	0.376175	NA	5	X-Z	CPSF6 Knock-out
RP13-941N14.1	105.977	-0.0124354	0.401471	-0.0309745	0.97529	0.991314	5	X-Z	CPSF6 Knock-out
DHODH	1982.98	-0.12484	0.0869051	-1.43651	0.150858	0.374168	5	X-Z	CPSF6 Knock-out
ZNF823	486.017	-0.338158	0.185055	-1.82734	0.0676486	0.218441	5	X-Z	CPSF6 Knock-out
RP11-325K4.2	18.6763	-2.61952	0.937989	-2.7927	0.00522699	0.030601	5	X-Z	CPSF6 Knock-out
ZNF260	935.942	-0.341759	0.127651	-2.6773	0.00742187	0.0403655	5	X-Z	CPSF6 Knock-out
WTIP	159.937	-0.169167	0.296392	-0.570754	0.568167	0.789112	5	X-Z	CPSF6 Knock-out
RP11-342K6.1	240.103	-2.20304	0.265302	-8.3039	1.00746e-16	8.02049e-15	5	X-Z	CPSF6 Knock-out
RP11-169D4.2	93.3824	0.273435	0.397804	0.68736	0.491856	0.738068	5	X-Z	CPSF6 Knock-out
PHLDB2	324.777	0.366566	0.217878	1.68243	0.0924847	0.271705	5	X-Z	CPSF6 Knock-out
VKORC1L1	3067.37	-0.856968	0.0817326	-10.485	1.01225e-25	1.77144e-23	5	X-Z	CPSF6 Knock-out
HIST1H1D	38.1136	0.175679	0.629661	0.279006	0.78024	0.906036	5	X-Z	CPSF6 Knock-out
AC007952.5	19.6047	-0.819937	0.847239	-0.967776	0.333156	0.60167	5	X-Z	CPSF6 Knock-out
RAB43P1	610.124	0.0761049	0.155512	0.489382	0.624571	0.824676	5	X-Z	CPSF6 Knock-out
ULK3	4796.27	-0.148203	0.0615312	-2.40858	0.0160146	0.0742089	5	X-Z	CPSF6 Knock-out
SOD1P3	18.0709	0.530176	0.898516	0.590058	0.555152	0.781475	5	X-Z	CPSF6 Knock-out
RP11-158H5.2	77.8157	-0.470721	0.437409	-1.07616	0.281857	0.547836	5	X-Z	CPSF6 Knock-out
RAC1P2	73.5095	0.629727	0.444558	1.41653	0.156622	0.383189	5	X-Z	CPSF6 Knock-out
TBC1D3P1-DHX40P1	134.676	0.603814	0.393028	1.53631	0.124461	0.330689	5	X-Z	CPSF6 Knock-out
ATP8A2	259.93	-0.605493	0.246464	-2.45672	0.0140212	0.0671668	5	X-Z	CPSF6 Knock-out
MCMBP	15043.1	-0.224109	0.0455232	-4.92297	8.52426e-07	1.56803e-05	5	X-Z	CPSF6 Knock-out
NIPSNAP1	8357.74	-0.0934743	0.0517617	-1.80586	0.0709402	0.225534	5	X-Z	CPSF6 Knock-out
CCNC	5994.23	-0.1597	0.068619	-2.32734	0.019947	0.087822	5	X-Z	CPSF6 Knock-out
POU4F1	96.3443	-0.500784	0.398464	-1.25679	0.208831	0.458625	5	X-Z	CPSF6 Knock-out
STXBP4	533.32	-0.545019	0.173705	-3.13761	0.00170331	0.0120403	5	X-Z	CPSF6 Knock-out
C1orf194	6.81896	-3.68775	1.81156	-2.03568	0.0417826	NA	5	X-Z	CPSF6 Knock-out
TARSL2	2349.81	-0.0810907	0.0807933	-1.00368	0.315532	0.583624	5	X-Z	CPSF6 Knock-out
SPATA7	343.612	-0.389623	0.204659	-1.90377	0.0569404	0.192126	5	X-Z	CPSF6 Knock-out
MAGOH	5378.54	-0.107867	0.0618061	-1.74525	0.0809418	0.247071	5	X-Z	CPSF6 Knock-out
APOBEC3D	3646.65	-0.0101757	0.0683356	-0.148908	0.881626	0.953593	5	X-Z	CPSF6 Knock-out
FAM78B	103.469	0.330842	0.371928	0.889533	0.373717	0.638889	5	X-Z	CPSF6 Knock-out
CYP27A1	17.3693	-1.08911	1.12286	-0.969942	0.332076	0.600681	5	X-Z	CPSF6 Knock-out
CUL9	6654.84	0.156255	0.0552546	2.82791	0.00468529	0.0280467	5	X-Z	CPSF6 Knock-out
PINX1	2810.41	0.154654	0.0757503	2.04163	0.0411879	0.152395	5	X-Z	CPSF6 Knock-out
APOBEC3C	26565.2	0.213914	0.0382836	5.58761	2.30217e-08	5.8153e-07	5	X-Z	CPSF6 Knock-out
BEX1	28.6702	-0.0922021	0.679878	-0.135616	0.892125	0.956923	5	X-Z	CPSF6 Knock-out
TARBP1	8931.82	0.0341322	0.0566045	0.602995	0.546512	0.775995	5	X-Z	CPSF6 Knock-out
GTF2I	18674.4	0.0143844	0.0518689	0.277323	0.781532	0.906802	5	X-Z	CPSF6 Knock-out
FAM167B	54.4005	0.593344	0.5094	1.16479	0.244104	0.503368	5	X-Z	CPSF6 Knock-out
AC007000.10	7.95603	-0.803446	1.50292	-0.534591	0.592933	NA	5	X-Z	CPSF6 Knock-out
P2RY1	446.351	-0.562351	0.254371	-2.21075	0.0270528	0.110982	5	X-Z	CPSF6 Knock-out
RP11-552F3.4	28.0313	0.387212	0.691822	0.559699	0.575685	0.793318	5	X-Z	CPSF6 Knock-out
PDK3	4575.52	0.507768	0.229802	2.20959	0.0271336	0.111267	5	X-Z	CPSF6 Knock-out
DDX60L	858.178	-0.406478	0.134642	-3.01895	0.00253653	0.0167638	5	X-Z	CPSF6 Knock-out
AC084219.4	11.845	1.26692	1.53715	0.824205	0.409823	NA	5	X-Z	CPSF6 Knock-out
MSMO1	5625.32	0.313315	0.06665	4.70089	2.59024e-06	4.27852e-05	5	X-Z	CPSF6 Knock-out
SNRPF	6099.7	-0.0780641	0.0591405	-1.31998	0.186843	0.42906	5	X-Z	CPSF6 Knock-out
XPNPEP2	92.3181	0.0144929	0.417797	0.0346889	0.972328	0.989598	5	X-Z	CPSF6 Knock-out
RSL24D1	14884.3	-0.144141	0.0431924	-3.33719	0.000846293	0.00669623	5	X-Z	CPSF6 Knock-out
ANAPC5	15853.2	-0.0770503	0.043552	-1.76916	0.076868	0.237992	5	X-Z	CPSF6 Knock-out
CCDC144A	436.571	1.34456	1.13544	1.18418	0.236342	0.494795	5	X-Z	CPSF6 Knock-out
STXBP5	5975.17	1.02771	0.0775378	13.2543	4.26222e-40	1.72487e-37	5	X-Z	CPSF6 Knock-out
IFITM3	5103.3	-0.0100688	0.237539	-0.042388	0.966189	0.986769	5	X-Z	CPSF6 Knock-out
RP11-715J22.3	35.1266	-0.652147	0.627974	-1.03849	0.29904	0.566828	5	X-Z	CPSF6 Knock-out
FGFR1OP	2950.28	0.678531	0.0855283	7.9334	2.1322e-15	1.48985e-13	5	X-Z	CPSF6 Knock-out
CLSTN3	12250.8	0.0976184	0.0437349	2.23205	0.0256118	0.106328	5	X-Z	CPSF6 Knock-out
FAM21FP	133.233	-0.532561	0.334499	-1.59211	0.111359	0.307835	5	X-Z	CPSF6 Knock-out
ATG101	3123.84	0.146359	0.0730225	2.00431	0.0450372	0.162179	5	X-Z	CPSF6 Knock-out
PVRL2	73.2243	0.140905	0.426808	0.330137	0.741296	0.885631	5	X-Z	CPSF6 Knock-out
ZNF85	1083.71	-0.0973066	0.11996	-0.811162	0.417273	0.678622	5	X-Z	CPSF6 Knock-out
DERL1	9502.92	0.266266	0.0572829	4.64826	3.34748e-06	5.36951e-05	5	X-Z	CPSF6 Knock-out
CTD-3088G3.4	15.0268	0.574571	0.98413	0.583836	0.559331	0.784193	5	X-Z	CPSF6 Knock-out
KIAA1468	2778.76	-0.161028	0.0797971	-2.01797	0.0435943	0.158314	5	X-Z	CPSF6 Knock-out
CTD-2619J13.19	47.4346	0.48856	0.593569	0.823089	0.410457	0.67311	5	X-Z	CPSF6 Knock-out
NGFRAP1	1691.07	0.24278	0.0981083	2.47462	0.013338	0.0645466	5	X-Z	CPSF6 Knock-out
AC104655.3	11.6748	4.15626	1.47391	2.81988	0.00480415	NA	5	X-Z	CPSF6 Knock-out
PPP1R8	7085.35	-0.1596	0.0527305	-3.02672	0.00247225	0.0164015	5	X-Z	CPSF6 Knock-out
CCDC71	1823.22	0.163996	0.096365	1.70182	0.0887896	0.263721	5	X-Z	CPSF6 Knock-out
ZNF429	428.686	-0.430958	0.186188	-2.31464	0.0206326	0.0900852	5	X-Z	CPSF6 Knock-out
GIMAP5	25695.6	-0.147257	0.0493583	-2.98343	0.00285038	0.0185303	5	X-Z	CPSF6 Knock-out
HK3	11.1798	0.0474508	1.06851	0.0444083	0.964579	NA	5	X-Z	CPSF6 Knock-out
RNASEH1P1	26.5504	0.899569	0.77361	1.16282	0.244903	0.504532	5	X-Z	CPSF6 Knock-out
NBEA	96.1617	0.111433	0.383269	0.290744	0.771247	0.901618	5	X-Z	CPSF6 Knock-out
MT-TL1	1578.9	-0.331775	0.102512	-3.23644	0.0012103	0.00905979	5	X-Z	CPSF6 Knock-out
IFNL3P1	38.2133	0.44738	0.622963	0.718149	0.472665	0.723183	5	X-Z	CPSF6 Knock-out
TMCO6	1816.14	-0.0506135	0.103513	-0.48896	0.62487	0.824812	5	X-Z	CPSF6 Knock-out
PLEC	31907	0.235121	0.0403102	5.83279	5.45082e-09	1.5548e-07	5	X-Z	CPSF6 Knock-out
PDE6C	17.5228	-1.92503	1.06192	-1.81278	0.0698661	0.222959	5	X-Z	CPSF6 Knock-out
TM2D3	2160.98	0.0125021	0.0870414	0.143633	0.88579	0.95505	5	X-Z	CPSF6 Knock-out
TIAF1	250.562	-0.0211664	0.232299	-0.0911172	0.927399	0.972508	5	X-Z	CPSF6 Knock-out
HSP90B1	65809.3	0.117522	0.0319915	3.67355	0.000239204	0.00227104	5	X-Z	CPSF6 Knock-out
C11orf45	23.4487	-0.503251	0.900903	-0.558608	0.576429	0.793781	5	X-Z	CPSF6 Knock-out
CATSPER2	507.729	0.633682	0.169862	3.73056	0.000191055	0.00187436	5	X-Z	CPSF6 Knock-out
RP11-481J2.4	13.3431	-0.677239	1.10633	-0.612147	0.54044	NA	5	X-Z	CPSF6 Knock-out
RP11-307E17.11	70.9164	0.305363	0.446816	0.683421	0.494341	0.739513	5	X-Z	CPSF6 Knock-out
RP11-231L11.3	12.3255	-0.373261	1.00879	-0.370008	0.711377	NA	5	X-Z	CPSF6 Knock-out
DMD	445.45	-0.429583	0.195689	-2.19523	0.028147	0.114504	5	X-Z	CPSF6 Knock-out
CAMK2N1	64.7229	-0.0812331	0.535011	-0.151834	0.879318	0.952669	5	X-Z	CPSF6 Knock-out
MX2	2677.24	-0.254061	0.0838582	-3.02965	0.00244836	0.0162763	5	X-Z	CPSF6 Knock-out
C9orf142	1601.27	0.0629999	0.0992413	0.634815	0.525549	0.761395	5	X-Z	CPSF6 Knock-out
NR3C2	293.517	-0.244562	0.227865	-1.07327	0.283148	0.549275	5	X-Z	CPSF6 Knock-out
TUBA3FP	67.8889	-0.136581	0.471758	-0.289515	0.772187	0.902168	5	X-Z	CPSF6 Knock-out
RP11-50D9.1	252.6	0.00605675	0.237566	0.025495	0.97966	0.9929	5	X-Z	CPSF6 Knock-out
LAMTOR5-AS1	244.955	0.380489	0.253207	1.50268	0.132921	0.344312	5	X-Z	CPSF6 Knock-out
RP11-506M13.3	34.1334	-1.40202	0.670803	-2.09006	0.0366121	0.139458	5	X-Z	CPSF6 Knock-out
LINC00920	72.8583	-0.333981	0.450754	-0.740938	0.458731	0.713439	5	X-Z	CPSF6 Knock-out
C19orf54	1403.17	-0.343124	0.102887	-3.33494	0.00085317	0.00673966	5	X-Z	CPSF6 Knock-out
DOCK2	55701.9	-0.0344396	0.0378641	-0.909558	0.363055	0.629603	5	X-Z	CPSF6 Knock-out
EXOC6B	1751.18	-0.00913474	0.0962925	-0.0948646	0.924422	0.9714	5	X-Z	CPSF6 Knock-out
PAK2	24071	0.0157396	0.0370997	0.424251	0.671383	0.851208	5	X-Z	CPSF6 Knock-out
ZFP3	424.001	0.332312	0.196026	1.69524	0.0900294	0.266426	5	X-Z	CPSF6 Knock-out
CYP2D7	192.134	-0.0684425	0.280962	-0.243601	0.80754	0.919732	5	X-Z	CPSF6 Knock-out
RP11-307C12.11	62.2391	0.443772	0.528523	0.839645	0.401107	0.665643	5	X-Z	CPSF6 Knock-out
SCAMP2	10854.6	-0.00801953	0.0466666	-0.171847	0.863558	0.945581	5	X-Z	CPSF6 Knock-out
RP11-573M3.3	14.2679	-0.719754	1.12001	-0.642629	0.520465	NA	5	X-Z	CPSF6 Knock-out
RP13-258O15.1	9.79773	0.663301	1.11862	0.592965	0.553204	NA	5	X-Z	CPSF6 Knock-out
RP4-545K15.5	34.4929	-0.015383	0.646446	-0.0237962	0.981015	0.993626	5	X-Z	CPSF6 Knock-out
CTA-38K21.2	10.3077	-0.57497	1.36401	-0.421529	0.673369	NA	5	X-Z	CPSF6 Knock-out
RP11-135J2.3	10.8228	-0.667894	1.37739	-0.484899	0.627748	NA	5	X-Z	CPSF6 Knock-out
AP1B1	13883.2	-0.148718	0.0458876	-3.24091	0.0011915	0.00893968	5	X-Z	CPSF6 Knock-out
CTD-2287O16.1	3694.98	0.013044	0.0739051	0.176497	0.859904	0.943969	5	X-Z	CPSF6 Knock-out
RP11-415F23.3	76.3638	-1.4486	0.479019	-3.02409	0.00249379	0.0165049	5	X-Z	CPSF6 Knock-out
TRNT1	3939.75	-0.372102	0.0659516	-5.64205	1.68041e-08	4.38146e-07	5	X-Z	CPSF6 Knock-out
LA16c-361A3.3	48.9216	0.595548	0.583211	1.02115	0.307181	0.575578	5	X-Z	CPSF6 Knock-out
ATP1B2	9.84237	-0.571	1.33488	-0.427755	0.668829	NA	5	X-Z	CPSF6 Knock-out
RP4-742C19.13	239.207	0.198789	0.251905	0.789143	0.430028	0.688534	5	X-Z	CPSF6 Knock-out
EP300-AS1	19.6789	1.11734	0.859592	1.29985	0.193651	0.437844	5	X-Z	CPSF6 Knock-out
CH507-338C24.1	162.872	-0.390723	0.298668	-1.30822	0.190799	0.434338	5	X-Z	CPSF6 Knock-out
DUTP2	28.8416	0.030299	0.676448	0.0447914	0.964274	0.98605	5	X-Z	CPSF6 Knock-out
TPST1	144.031	0.38413	0.308853	1.24373	0.213598	0.464435	5	X-Z	CPSF6 Knock-out
TBC1D15	7968.17	-0.0387574	0.054446	-0.711851	0.476557	0.726617	5	X-Z	CPSF6 Knock-out
LONRF1	740.075	-0.00103904	0.145449	-0.00714366	0.9943	0.998364	5	X-Z	CPSF6 Knock-out
AC079807.2	23.4074	-0.0506346	0.758345	-0.0667699	0.946765	0.979803	5	X-Z	CPSF6 Knock-out
IFIT1	119.476	-0.506202	0.405355	-1.24879	0.211743	0.462063	5	X-Z	CPSF6 Knock-out
AC024937.4	43.4907	-0.0599913	0.567096	-0.105787	0.915752	0.967764	5	X-Z	CPSF6 Knock-out
MTUS2	16.8344	0.897081	0.931706	0.962837	0.335629	0.60389	5	X-Z	CPSF6 Knock-out
CLCC1	2136.05	0.162125	0.0855227	1.89569	0.0580009	0.194743	5	X-Z	CPSF6 Knock-out
SNHG3	6662.78	0.108632	0.0659863	1.64628	0.099707	0.285918	5	X-Z	CPSF6 Knock-out
INTS12	1892.87	0.0214691	0.0950776	0.225806	0.821352	0.926152	5	X-Z	CPSF6 Knock-out
TRAV12-2	913.612	0.177742	0.125616	1.41496	0.15708	0.383597	5	X-Z	CPSF6 Knock-out
FRG1CP	1158.02	0.188549	0.117103	1.61011	0.107374	0.300107	5	X-Z	CPSF6 Knock-out
MAP2K4	3750.33	-0.189518	0.0721801	-2.62563	0.00864894	0.0458656	5	X-Z	CPSF6 Knock-out
RP4-635E18.7	46.6146	-0.987187	0.576697	-1.71179	0.0869348	0.259841	5	X-Z	CPSF6 Knock-out
SLC27A3	594.96	-0.280508	0.165126	-1.69875	0.0893664	0.265029	5	X-Z	CPSF6 Knock-out
AL354822.1	81.8799	-0.124363	0.504607	-0.246456	0.805329	0.918624	5	X-Z	CPSF6 Knock-out
IFRD1	2220.29	-0.0426249	0.0833215	-0.511572	0.608951	0.814786	5	X-Z	CPSF6 Knock-out
RPL7P7	8.11611	0.99306	1.3628	0.728691	0.46619	NA	5	X-Z	CPSF6 Knock-out
ADD1	29787.7	0.0736057	0.0353829	2.08026	0.0375017	0.141919	5	X-Z	CPSF6 Knock-out
RP11-585P4.6	12.0208	1.44067	1.11496	1.29212	0.196315	NA	5	X-Z	CPSF6 Knock-out
HIST1H2AB	12.1613	2.26471	1.05876	2.13902	0.0324339	NA	5	X-Z	CPSF6 Knock-out
RFT1	3009.43	-0.166111	0.0836203	-1.98649	0.0469795	0.1672	5	X-Z	CPSF6 Knock-out
HIBADH	1893.49	-0.0418613	0.09334	-0.448481	0.653806	0.842522	5	X-Z	CPSF6 Knock-out
RP11-161H23.10	28.6331	0.471515	0.676688	0.696798	0.485929	0.73354	5	X-Z	CPSF6 Knock-out
NCAPG	19855.4	0.0910988	0.0438233	2.07878	0.037638	0.142238	5	X-Z	CPSF6 Knock-out
MFHAS1	16691.7	-0.0209847	0.0447237	-0.469209	0.63892	0.833626	5	X-Z	CPSF6 Knock-out
CTD-2540F13.2	80.2427	1.10986	0.431165	2.57409	0.0100503	0.051774	5	X-Z	CPSF6 Knock-out
C1QTNF9B-AS1	22.1189	4.08342	1.27144	3.21165	0.00131975	0.00975501	5	X-Z	CPSF6 Knock-out
CKS2	5759.05	0.0768073	0.0836254	0.918468	0.358374	0.625576	5	X-Z	CPSF6 Knock-out
SBF2	2058.76	0.0473865	0.0866944	0.546593	0.584659	0.799001	5	X-Z	CPSF6 Knock-out
NOSIP	5323.28	0.25303	0.0583653	4.33528	1.45576e-05	0.000198026	5	X-Z	CPSF6 Knock-out
CATSPER2P1	147.681	0.35673	0.300315	1.18785	0.234891	0.492845	5	X-Z	CPSF6 Knock-out
TSPAN10	77.1568	0.0138742	0.432368	0.0320888	0.974401	0.991033	5	X-Z	CPSF6 Knock-out
PAK1	5792.22	-0.289946	0.0578807	-5.00937	5.46086e-07	1.05235e-05	5	X-Z	CPSF6 Knock-out
HNRNPLL	3317	-2.05947	0.0929802	-22.1495	1.05416e-108	6.82568e-105	5	X-Z	CPSF6 Knock-out
LAT	21192.4	0.121948	0.0526623	2.31567	0.0205765	0.0899005	5	X-Z	CPSF6 Knock-out
NUP50	19402.7	-0.263244	0.038906	-6.76617	1.32237e-11	5.87804e-10	5	X-Z	CPSF6 Knock-out
VPS11	4632.71	-0.289472	0.0705527	-4.10292	4.07965e-05	0.000492525	5	X-Z	CPSF6 Knock-out
EGLN1	9324.61	-0.673181	0.0632865	-10.6371	2.00364e-26	3.85354e-24	5	X-Z	CPSF6 Knock-out
SNORD117	30.1213	-0.00485799	0.682983	-0.0071129	0.994325	0.998364	5	X-Z	CPSF6 Knock-out
MYH7B	49.4019	-0.600434	0.531767	-1.12913	0.258843	0.522175	5	X-Z	CPSF6 Knock-out
PLA1A	7.00528	-3.22485	1.84529	-1.74761	0.0805311	NA	5	X-Z	CPSF6 Knock-out
SNORA5C	37.3062	-0.708007	0.600048	-1.17992	0.238033	0.49625	5	X-Z	CPSF6 Knock-out
RBSN	2999.31	-0.180331	0.077963	-2.31303	0.020721	0.09041	5	X-Z	CPSF6 Knock-out
NET1	6580.39	-0.0394311	0.0602303	-0.654672	0.512679	0.752291	5	X-Z	CPSF6 Knock-out
RP11-348P10.2	36.4212	-2.44486	0.660532	-3.70135	0.000214458	0.00206845	5	X-Z	CPSF6 Knock-out
RP4-669H2.1	33.7362	0.618419	0.641531	0.963975	0.335059	0.603434	5	X-Z	CPSF6 Knock-out
CYB5R1	1563.02	-0.0160267	0.0984346	-0.162816	0.870663	0.949009	5	X-Z	CPSF6 Knock-out
SNF8	5384.39	0.0775043	0.0588792	1.31633	0.188064	0.430643	5	X-Z	CPSF6 Knock-out
RAB28	1375.22	-0.216226	0.116084	-1.86267	0.0625084	0.205592	5	X-Z	CPSF6 Knock-out
RP11-536C10.12	102.534	0.231294	0.368689	0.627341	0.530435	0.764994	5	X-Z	CPSF6 Knock-out
TBC1D2B	15882.1	0.0133389	0.0481099	0.277258	0.781582	0.906802	5	X-Z	CPSF6 Knock-out
UBE2F-SCLY	114.785	1.23799	1.31976	0.938041	0.348223	0.616262	5	X-Z	CPSF6 Knock-out
ZNF658B	168.094	-0.025949	0.292948	-0.0885788	0.929417	0.973406	5	X-Z	CPSF6 Knock-out
FZR1	5977.85	0.148176	0.0573688	2.58286	0.00979838	0.0507827	5	X-Z	CPSF6 Knock-out
ZDHHC15	47.3732	0.267002	0.591383	0.451487	0.651638	0.841348	5	X-Z	CPSF6 Knock-out
FAM35BP	304.649	-0.0840936	0.211168	-0.39823	0.69046	0.861856	5	X-Z	CPSF6 Knock-out
RSPO4	19.7503	-0.398426	0.827449	-0.481511	0.630153	0.827601	5	X-Z	CPSF6 Knock-out
KIT	69.6558	0.0618031	0.436367	0.141631	0.887371	0.955204	5	X-Z	CPSF6 Knock-out
ZMIZ2	11285.9	0.224317	0.0468321	4.78983	1.66926e-06	2.88739e-05	5	X-Z	CPSF6 Knock-out
SKIV2L	10136.7	0.056591	0.0480106	1.17872	0.23851	0.496789	5	X-Z	CPSF6 Knock-out
MYL9	1842.46	0.15126	0.0977886	1.54681	0.121909	0.325867	5	X-Z	CPSF6 Knock-out
RP11-365F18.3	9.91173	1.94243	1.35291	1.43574	0.151076	NA	5	X-Z	CPSF6 Knock-out
PRELID3B	10607.8	-0.367177	0.0489455	-7.50176	6.29648e-14	3.65102e-12	5	X-Z	CPSF6 Knock-out
AURKB	10087	0.0408681	0.0563146	0.725711	0.468016	0.719507	5	X-Z	CPSF6 Knock-out
SDHAF1	1416.2	0.298712	0.101959	2.92972	0.00339273	0.021502	5	X-Z	CPSF6 Knock-out
RP11-423C15.3	8.40132	-1.53614	1.4133	-1.08692	0.277073	NA	5	X-Z	CPSF6 Knock-out
ALG1L9P	46.3221	-0.183675	0.549772	-0.334092	0.73831	0.883761	5	X-Z	CPSF6 Knock-out
LEXM	8.86842	-0.444175	1.36153	-0.326231	0.74425	NA	5	X-Z	CPSF6 Knock-out
PPP1R36	20.3867	0.418305	0.817531	0.511669	0.608883	0.814786	5	X-Z	CPSF6 Knock-out
RNASE6	67.7538	0.0717595	0.503917	0.142404	0.886761	0.95505	5	X-Z	CPSF6 Knock-out
RP11-5C23.2	28.0146	0.251136	0.699717	0.358911	0.719662	0.874555	5	X-Z	CPSF6 Knock-out
TIMELESS	16387.5	-0.0942421	0.046649	-2.02024	0.0433589	0.157695	5	X-Z	CPSF6 Knock-out
RP11-30L15.4	29.6421	-0.65517	0.695191	-0.942431	0.345972	0.613939	5	X-Z	CPSF6 Knock-out
ERVFRD-3	18.3789	-0.172606	0.841301	-0.205165	0.837443	0.933851	5	X-Z	CPSF6 Knock-out
CTD-2162K18.3	21.3159	-0.383718	0.798064	-0.480811	0.630651	0.827908	5	X-Z	CPSF6 Knock-out
MYCBP	4180.22	-0.460586	0.0699251	-6.58684	4.49279e-11	1.85795e-09	5	X-Z	CPSF6 Knock-out
HCN2	175.655	-0.0252716	0.293341	-0.0861507	0.931347	0.97406	5	X-Z	CPSF6 Knock-out
TIMM8AP1	78.5122	0.730607	0.442234	1.65208	0.0985178	0.283657	5	X-Z	CPSF6 Knock-out
HERPUD1	8576.22	-0.201211	0.0652499	-3.0837	0.00204443	0.0139834	5	X-Z	CPSF6 Knock-out
ZKSCAN5	2774.48	-0.172953	0.0806559	-2.14433	0.0320062	0.12611	5	X-Z	CPSF6 Knock-out
TRAJ34	42.6054	-0.960659	0.752821	-1.27608	0.201927	0.44912	5	X-Z	CPSF6 Knock-out
ALG13	3133.14	-0.0470085	0.0785188	-0.598691	0.549379	0.777749	5	X-Z	CPSF6 Knock-out
CAMKV	68.3009	0.686625	0.482304	1.42363	0.154552	0.380263	5	X-Z	CPSF6 Knock-out
HOMER3	99.1977	-0.101332	0.383069	-0.264526	0.791375	0.91202	5	X-Z	CPSF6 Knock-out
SIRT6	2370.57	0.0701288	0.0836068	0.838793	0.401585	0.666176	5	X-Z	CPSF6 Knock-out
PMAIP1	4521.69	-0.274632	0.0713079	-3.85136	0.000117466	0.00122941	5	X-Z	CPSF6 Knock-out
ITFG2	2085.63	0.0605087	0.0913621	0.662296	0.507782	0.749129	5	X-Z	CPSF6 Knock-out
LMCD1	496.766	-0.215032	0.196833	-1.09246	0.274632	0.540704	5	X-Z	CPSF6 Knock-out
RPS5	72584.5	-0.0141464	0.0314784	-0.449399	0.653144	0.84206	5	X-Z	CPSF6 Knock-out
PPCS	3121.64	-0.124224	0.0723344	-1.71736	0.0859136	0.25778	5	X-Z	CPSF6 Knock-out
MBTPS2	770.919	-0.151206	0.139243	-1.08591	0.277517	0.543166	5	X-Z	CPSF6 Knock-out
EFR3B	594.805	-0.0353883	0.156659	-0.225894	0.821284	0.926152	5	X-Z	CPSF6 Knock-out
FOXJ1	70.75	0.277811	0.502137	0.553259	0.580086	0.795888	5	X-Z	CPSF6 Knock-out
CHST2	2282.46	0.206968	0.0988569	2.09361	0.0362944	0.13862	5	X-Z	CPSF6 Knock-out
JMJD4	1437.8	0.14955	0.100841	1.48302	0.138069	0.353013	5	X-Z	CPSF6 Knock-out
PSMC2	13544.7	0.0523245	0.0426678	1.22632	0.220077	0.473197	5	X-Z	CPSF6 Knock-out
LINC00346	19.5151	-0.332141	0.953372	-0.348385	0.727551	0.878461	5	X-Z	CPSF6 Knock-out
DOCK5	160.801	-0.016174	0.298978	-0.0540976	0.956857	0.983191	5	X-Z	CPSF6 Knock-out
PEPD	2416.5	-0.017082	0.0962415	-0.177491	0.859123	0.943969	5	X-Z	CPSF6 Knock-out
RP11-449H3.3	294.964	1.06358	0.236695	4.49348	7.00679e-06	0.000102413	5	X-Z	CPSF6 Knock-out
SLC35F6	920.245	0.259463	0.131088	1.97931	0.0477816	0.169341	5	X-Z	CPSF6 Knock-out
ZBTB44	7686.17	-0.291308	0.050948	-5.71774	1.07951e-08	2.9287e-07	5	X-Z	CPSF6 Knock-out
RBM10	12123.6	-0.0670087	0.0462271	-1.44955	0.147183	0.368057	5	X-Z	CPSF6 Knock-out
SNORD36C	47.084	0.431147	0.532155	0.810191	0.417831	0.678966	5	X-Z	CPSF6 Knock-out
CHN2	13.14	-1.86113	1.18478	-1.57086	0.116215	NA	5	X-Z	CPSF6 Knock-out
AF131216.6	37.894	-0.0670916	0.589794	-0.113754	0.909433	0.964602	5	X-Z	CPSF6 Knock-out
RP11-16E18.3	14.2562	-1.18534	1.00236	-1.18255	0.236989	NA	5	X-Z	CPSF6 Knock-out
RP11-315O6.1	10.3408	0.053848	1.21522	0.0443115	0.964656	NA	5	X-Z	CPSF6 Knock-out
TAF11	3381.75	-0.255192	0.074518	-3.42456	0.000615789	0.00512937	5	X-Z	CPSF6 Knock-out
AVPR2	86.8511	-0.700245	0.406016	-1.72467	0.0845863	0.254974	5	X-Z	CPSF6 Knock-out
RP11-351I21.11	21.4932	-1.14197	0.8387	-1.36159	0.173328	0.408553	5	X-Z	CPSF6 Knock-out
AC011893.3	366.753	-0.0681269	0.195754	-0.348024	0.727822	0.878536	5	X-Z	CPSF6 Knock-out
LHB	14.9668	-1.74661	1.09365	-1.59705	0.110254	0.305976	5	X-Z	CPSF6 Knock-out
RP11-355N15.1	10.2793	0.871785	1.36018	0.640935	0.521565	NA	5	X-Z	CPSF6 Knock-out
MYLK3	17.567	-0.690263	0.856225	-0.80617	0.420145	0.680885	5	X-Z	CPSF6 Knock-out
SLC29A1	7580.55	0.0232909	0.0576777	0.40381	0.686352	0.859101	5	X-Z	CPSF6 Knock-out
RP3-428L16.2	40.2505	0.702945	0.627426	1.12036	0.262559	0.52612	5	X-Z	CPSF6 Knock-out
ST3GAL1	18803	-0.0119339	0.0388727	-0.306999	0.758844	0.895861	5	X-Z	CPSF6 Knock-out
UBE2V1P2	447.689	0.0420747	0.176478	0.238414	0.81156	0.922066	5	X-Z	CPSF6 Knock-out
TPM3P6	172.896	0.162376	0.286122	0.567504	0.570372	0.790296	5	X-Z	CPSF6 Knock-out
SASH3	24203.8	0.04471	0.0386158	1.15782	0.246939	0.506954	5	X-Z	CPSF6 Knock-out
LINC00944	38.942	-0.355097	0.59434	-0.597465	0.550197	0.778014	5	X-Z	CPSF6 Knock-out
BRPF3	4196.23	-0.25828	0.068721	-3.75839	0.000171008	0.00170002	5	X-Z	CPSF6 Knock-out
GPAT4	12844.4	0.0273872	0.0440497	0.621734	0.534117	0.767413	5	X-Z	CPSF6 Knock-out
HMGB3P24	15.8385	-1.09764	0.996432	-1.10157	0.270647	0.535581	5	X-Z	CPSF6 Knock-out
PPP1R14A	30.0743	0.622261	0.713228	0.872458	0.382959	0.647884	5	X-Z	CPSF6 Knock-out
RBBP4P5	91.6985	-0.370014	0.401489	-0.921606	0.356734	0.623948	5	X-Z	CPSF6 Knock-out
PFKP	42037.1	-0.0747367	0.0359353	-2.07976	0.0375479	0.142066	5	X-Z	CPSF6 Knock-out
RP4-669P10.19	35.2353	-1.19248	0.631806	-1.88741	0.0591046	0.197586	5	X-Z	CPSF6 Knock-out
XDH	34.1035	0.293463	0.647816	0.453003	0.650546	0.840552	5	X-Z	CPSF6 Knock-out
RP11-399J13.2	28.574	-0.24274	0.74268	-0.326844	0.743786	0.886982	5	X-Z	CPSF6 Knock-out
DNAJB1	11598.2	0.295579	0.0657547	4.49518	6.95107e-06	0.000101829	5	X-Z	CPSF6 Knock-out
C15orf39	4572.88	0.101018	0.0659117	1.53262	0.125369	0.332039	5	X-Z	CPSF6 Knock-out
TMCO4	2186.42	-0.207506	0.0935236	-2.21876	0.0265032	0.109351	5	X-Z	CPSF6 Knock-out
ZNF831	1928.25	-0.0863028	0.104315	-0.827329	0.40805	0.67077	5	X-Z	CPSF6 Knock-out
ZBTB38	5962.79	0.105808	0.0606072	1.74581	0.0808445	0.246841	5	X-Z	CPSF6 Knock-out
USP1	20349.9	0.0326159	0.0449605	0.725436	0.468185	0.719507	5	X-Z	CPSF6 Knock-out
GNG12	59.627	-0.0261871	0.617982	-0.0423752	0.9662	0.986769	5	X-Z	CPSF6 Knock-out
MIR4489	14.9695	0.743042	0.930309	0.798704	0.424462	0.684019	5	X-Z	CPSF6 Knock-out
RNASEH1	2958.61	0.455605	0.0753795	6.04415	1.502e-09	4.77519e-08	5	X-Z	CPSF6 Knock-out
DIMT1	8982.24	-1.2685	0.049467	-25.6434	5.0037e-145	9.71969e-141	5	X-Z	CPSF6 Knock-out
CACNA1I	147.552	0.692869	0.390702	1.77339	0.0761633	0.236526	5	X-Z	CPSF6 Knock-out
RPSAP8	43.8236	-0.120175	0.557962	-0.215381	0.82947	0.929314	5	X-Z	CPSF6 Knock-out
DIXDC1	9045.15	-0.195772	0.0480591	-4.07357	4.62981e-05	0.000550729	5	X-Z	CPSF6 Knock-out
MUT	4118.37	-0.0262495	0.0700115	-0.374932	0.707711	0.870023	5	X-Z	CPSF6 Knock-out
TPK1	1460.05	-0.203259	0.111233	-1.82732	0.067652	0.218441	5	X-Z	CPSF6 Knock-out
HBP1	3247.53	0.157325	0.0884925	1.77783	0.0754317	0.235043	5	X-Z	CPSF6 Knock-out
CD8A	151.809	0.057107	0.330183	0.172955	0.862686	0.945107	5	X-Z	CPSF6 Knock-out
RP11-572O17.1	224.663	0.397596	0.256193	1.55194	0.120677	0.32431	5	X-Z	CPSF6 Knock-out
SLC4A8	396.351	-0.578814	0.210911	-2.74435	0.00606309	0.0344071	5	X-Z	CPSF6 Knock-out
RP11-295I5.3	7.29914	0.464682	1.54962	0.299868	0.764278	NA	5	X-Z	CPSF6 Knock-out
RP11-289I10.2	455.358	0.496123	0.18031	2.7515	0.00593235	0.0338332	5	X-Z	CPSF6 Knock-out
MRM1	1582.85	-0.0668972	0.114704	-0.583214	0.559749	0.784231	5	X-Z	CPSF6 Knock-out
FLJ22447	146.526	0.442016	0.396878	1.11373	0.265394	0.529613	5	X-Z	CPSF6 Knock-out
TXN	17948.6	0.0479997	0.0447738	1.07205	0.283698	0.549874	5	X-Z	CPSF6 Knock-out
ZNF708	1303.69	-0.370077	0.113326	-3.2656	0.00109233	0.00831775	5	X-Z	CPSF6 Knock-out
BCRP2	36.1193	-0.826734	0.614139	-1.34617	0.178249	0.415764	5	X-Z	CPSF6 Knock-out
HCG4P11	198.202	-0.002593	0.387994	-0.00668309	0.994668	0.998433	5	X-Z	CPSF6 Knock-out
PQBP1	6427.89	0.045942	0.0606788	0.757134	0.448969	0.704247	5	X-Z	CPSF6 Knock-out
RP11-671J11.5	482.029	-0.239162	0.169224	-1.41328	0.157573	0.384529	5	X-Z	CPSF6 Knock-out
RP11-80A15.1	14.4134	0.516018	0.941395	0.548142	0.583594	NA	5	X-Z	CPSF6 Knock-out
SMURF2	2383.27	0.136056	0.0872731	1.55897	0.119004	0.321847	5	X-Z	CPSF6 Knock-out
PSMD10	3622.69	-0.0272733	0.0702763	-0.388088	0.697951	0.864925	5	X-Z	CPSF6 Knock-out
UPP1	5944.55	-0.0752022	0.0670387	-1.12177	0.261959	0.525821	5	X-Z	CPSF6 Knock-out
HNRNPA3P2	20.9612	0.245774	0.812454	0.302508	0.762265	0.897661	5	X-Z	CPSF6 Knock-out
RP3-406P24.5	25.0541	-0.217226	0.731081	-0.29713	0.766367	0.899296	5	X-Z	CPSF6 Knock-out
FAM83A	9.8607	-1.78038	1.31903	-1.34977	0.177089	NA	5	X-Z	CPSF6 Knock-out
STIM1	16129.4	0.0571874	0.0404151	1.415	0.157068	0.383597	5	X-Z	CPSF6 Knock-out
LINC00173	29.023	0.287772	0.666988	0.431449	0.666142	0.849301	5	X-Z	CPSF6 Knock-out
DLGAP4	7486.29	0.0274653	0.0518611	0.529593	0.596394	0.807184	5	X-Z	CPSF6 Knock-out
RP5-1139B12.2	52.7016	-0.608722	0.616161	-0.987927	0.323188	0.592146	5	X-Z	CPSF6 Knock-out
ZNF442	52.0171	-1.22551	0.526455	-2.32785	0.0199199	0.0877226	5	X-Z	CPSF6 Knock-out
C2orf82	42.5005	-0.716983	0.611076	-1.17331	0.240671	0.498883	5	X-Z	CPSF6 Knock-out
RP11-365O16.1	100.701	0.522004	0.381376	1.36874	0.171082	0.405168	5	X-Z	CPSF6 Knock-out
SNORA14	278.914	1.02662	0.232112	4.42293	9.73697e-06	0.000137557	5	X-Z	CPSF6 Knock-out
KRT18P39	88.7618	0.367673	0.392542	0.936646	0.348941	0.616814	5	X-Z	CPSF6 Knock-out
COTL1	78100.1	-0.0105554	0.0320929	-0.3289	0.742231	0.886114	5	X-Z	CPSF6 Knock-out
FDX1L	364.506	0.00699363	0.211377	0.033086	0.973606	0.99038	5	X-Z	CPSF6 Knock-out
RP11-1114A5.4	46.2894	-1.21993	0.573597	-2.12681	0.0334362	0.129946	5	X-Z	CPSF6 Knock-out
CLSPN	9601.41	0.220358	0.0509695	4.32332	1.53697e-05	0.0002069	5	X-Z	CPSF6 Knock-out
EIF3B	39113	-0.0243301	0.0344707	-0.705819	0.4803	0.729197	5	X-Z	CPSF6 Knock-out
PRR12	6147.29	-0.0254464	0.0685019	-0.37147	0.710288	0.870934	5	X-Z	CPSF6 Knock-out
SAP25	15.2892	-1.04296	1.05693	-0.986781	0.32375	0.592672	5	X-Z	CPSF6 Knock-out
SLC2A9	45.4106	-0.576147	0.570543	-1.00982	0.31258	0.580652	5	X-Z	CPSF6 Knock-out
RIOK3	11429.7	-0.100349	0.0567621	-1.76788	0.0770805	0.238384	5	X-Z	CPSF6 Knock-out
GPD2	4996.17	-0.0663058	0.0590526	-1.12283	0.261512	0.525242	5	X-Z	CPSF6 Knock-out
NCDN	4173.85	0.107664	0.0674579	1.59601	0.110486	0.306291	5	X-Z	CPSF6 Knock-out
MVB12A	2081.45	0.0886721	0.0918414	0.965492	0.334298	0.602836	5	X-Z	CPSF6 Knock-out
DIS3	14075.5	0.0569421	0.0419063	1.3588	0.174211	0.409443	5	X-Z	CPSF6 Knock-out
ATP2B1	4264.23	-0.0822742	0.0638865	-1.28782	0.197809	0.444208	5	X-Z	CPSF6 Knock-out
DENND6B	1689.25	-0.16847	0.0967636	-1.74104	0.0816761	0.248521	5	X-Z	CPSF6 Knock-out
RP11-727F15.12	41.6836	0.110308	0.574764	0.191918	0.847806	0.938787	5	X-Z	CPSF6 Knock-out
CDPF1	690.221	-0.156932	0.14771	-1.06243	0.288038	0.555184	5	X-Z	CPSF6 Knock-out
MROH1	5645.01	0.169121	0.0681752	2.48068	0.0131132	0.0637127	5	X-Z	CPSF6 Knock-out
TCAF2	16016.8	0.0465062	0.0468455	0.992758	0.320828	0.589783	5	X-Z	CPSF6 Knock-out
RP11-174G6.5	228.84	-0.545857	0.271524	-2.01034	0.0443948	0.16053	5	X-Z	CPSF6 Knock-out
NPIPB3	1885.05	-0.233084	0.0911075	-2.55833	0.0105175	0.0536917	5	X-Z	CPSF6 Knock-out
LAMC3	81.616	0.189601	0.409107	0.463452	0.643041	0.836539	5	X-Z	CPSF6 Knock-out
HIST1H2AC	399.755	0.0270526	0.213219	0.126878	0.899037	0.959972	5	X-Z	CPSF6 Knock-out
CDKL3	103.767	-0.100577	0.454139	-0.221468	0.824728	0.927633	5	X-Z	CPSF6 Knock-out
RP4-758J18.13	368.509	0.0938213	0.193217	0.485576	0.627268	0.825894	5	X-Z	CPSF6 Knock-out
AC099850.1	226.229	-0.240761	0.259136	-0.92909	0.352842	0.620083	5	X-Z	CPSF6 Knock-out
CPOX	8809.15	-0.135037	0.052932	-2.55115	0.010737	0.0545411	5	X-Z	CPSF6 Knock-out
C1S	240.147	-0.370989	0.245739	-1.50969	0.131123	0.341612	5	X-Z	CPSF6 Knock-out
PTGIR	4379.07	0.229341	0.0626329	3.66167	0.00025058	0.00236517	5	X-Z	CPSF6 Knock-out
SEPT10P1	20.4052	-0.424493	0.82364	-0.515386	0.606283	0.813108	5	X-Z	CPSF6 Knock-out
AC115617.2	386.118	0.0198529	0.21231	0.0935093	0.925499	0.971774	5	X-Z	CPSF6 Knock-out
KCTD10	9068.62	0.131046	0.0480617	2.72662	0.00639863	0.0359333	5	X-Z	CPSF6 Knock-out
REEP6	170.401	-0.30451	0.304787	-0.99909	0.317751	0.586109	5	X-Z	CPSF6 Knock-out
YWHAE	41135	-0.112364	0.0356449	-3.15233	0.00161973	0.0115632	5	X-Z	CPSF6 Knock-out
LAMC1	316.297	1.15447	0.222965	5.1778	2.24522e-07	4.69713e-06	5	X-Z	CPSF6 Knock-out
FTSJ1	6448.6	0.0539135	0.0546087	0.987271	0.32351	0.592543	5	X-Z	CPSF6 Knock-out
KLF7-IT1	26.115	-1.01425	0.713667	-1.42118	0.155264	0.381362	5	X-Z	CPSF6 Knock-out
PRPF31	11056	-0.044271	0.0481357	-0.919712	0.357723	0.624854	5	X-Z	CPSF6 Knock-out
LINC00511	55.6995	0.365894	0.520275	0.703271	0.481887	0.730616	5	X-Z	CPSF6 Knock-out
ZNRF3	270.415	-0.0623822	0.238582	-0.261471	0.793729	0.912775	5	X-Z	CPSF6 Knock-out
RP4-647C14.3	22.7758	1.69328	0.817886	2.07031	0.038423	0.144477	5	X-Z	CPSF6 Knock-out
C17orf107	129.905	0.358659	0.332517	1.07862	0.280758	0.546692	5	X-Z	CPSF6 Knock-out
BATF	8397.98	-0.127391	0.053394	-2.38588	0.0170385	0.077821	5	X-Z	CPSF6 Knock-out
RP1-8B1.4	11.2993	1.29856	1.26626	1.02551	0.305124	NA	5	X-Z	CPSF6 Knock-out
CAPN3	247.384	0.472956	0.301188	1.5703	0.116345	0.317017	5	X-Z	CPSF6 Knock-out
MT-RNR2	468729	-0.124481	0.0426209	-2.92065	0.00349302	0.0220031	5	X-Z	CPSF6 Knock-out
MED12L	1012.45	0.984652	0.139764	7.04512	1.853e-12	9.34923e-11	5	X-Z	CPSF6 Knock-out
CACNA1H	91.903	0.34998	0.419939	0.833408	0.404614	0.668564	5	X-Z	CPSF6 Knock-out
RP11-363N22.3	68.4464	-0.281494	0.441041	-0.638249	0.523312	0.759369	5	X-Z	CPSF6 Knock-out
AP006621.5	598.921	0.550712	0.154118	3.57332	0.000352479	0.00318215	5	X-Z	CPSF6 Knock-out
ECT2L	11.9141	-1.12772	1.04166	-1.08262	0.278977	NA	5	X-Z	CPSF6 Knock-out
RP11-253I19.3	10.7193	-0.0325979	1.14508	-0.0284677	0.977289	NA	5	X-Z	CPSF6 Knock-out
TCERG1L	14.5861	-0.0319146	1.14904	-0.0277752	0.977841	NA	5	X-Z	CPSF6 Knock-out
PTGER1	14.956	1.90824	1.13007	1.68861	0.0912951	0.269106	5	X-Z	CPSF6 Knock-out
FBXO18	8843.96	-0.0864057	0.0480878	-1.79683	0.0723625	0.228447	5	X-Z	CPSF6 Knock-out
RYBP	23541.6	-0.091577	0.0398983	-2.29526	0.0217183	0.0935221	5	X-Z	CPSF6 Knock-out
CD52	18751.1	0.0677488	0.0485198	1.39631	0.162621	0.392313	5	X-Z	CPSF6 Knock-out
RP11-438D8.2	8.43285	0.596947	1.27405	0.468543	0.639396	NA	5	X-Z	CPSF6 Knock-out
FAM27C	100.303	0.720013	0.372246	1.93424	0.053084	0.182603	5	X-Z	CPSF6 Knock-out
BPTF	27071.6	0.0752691	0.0413021	1.8224	0.0683941	0.220032	5	X-Z	CPSF6 Knock-out
MGAT2	4502.63	0.175766	0.369187	0.476089	0.634011	0.830436	5	X-Z	CPSF6 Knock-out
BCL9	4711.86	0.219821	0.0744734	2.95168	0.00316052	0.0201951	5	X-Z	CPSF6 Knock-out
HAPLN3	3298.52	0.0142737	0.0720933	0.19799	0.843053	0.936386	5	X-Z	CPSF6 Knock-out
HUWE1	146727	0.251009	0.0301051	8.33777	7.57032e-17	6.15286e-15	5	X-Z	CPSF6 Knock-out
LDAH	2992.03	-0.297911	0.0834399	-3.57037	0.00035648	0.00321328	5	X-Z	CPSF6 Knock-out
GPRC5A	83.3521	0.0921931	0.414128	0.22262	0.823831	0.927491	5	X-Z	CPSF6 Knock-out
PTPN11	25834.5	-0.0810021	0.0376605	-2.15085	0.0314881	0.124434	5	X-Z	CPSF6 Knock-out
RBBP6	18403.5	0.496121	0.0433783	11.4371	2.7292e-30	6.70038e-28	5	X-Z	CPSF6 Knock-out
ZC3H7B	13514.5	0.0588566	0.0461765	1.2746	0.202451	0.449703	5	X-Z	CPSF6 Knock-out
OTUB2	463.405	0.3398	0.188215	1.80538	0.0710153	0.225662	5	X-Z	CPSF6 Knock-out
RP11-348F1.3	24.6197	0.360665	0.753169	0.478864	0.632036	0.82915	5	X-Z	CPSF6 Knock-out
RPP30	8700.23	0.0327917	0.0592266	0.553665	0.579808	0.795774	5	X-Z	CPSF6 Knock-out
AC007325.4	152.689	-0.176885	0.305876	-0.57829	0.563069	0.786313	5	X-Z	CPSF6 Knock-out
FBXO45	4442.7	-0.104558	0.0646364	-1.61764	0.105741	0.297038	5	X-Z	CPSF6 Knock-out
IFT74	1784.33	0.172773	0.0972782	1.77607	0.0757212	0.235643	5	X-Z	CPSF6 Knock-out
AC105760.2	60.016	0.0297712	0.469638	0.0633918	0.949455	0.980948	5	X-Z	CPSF6 Knock-out
ATP6V1C1	3921.59	0.0919678	0.0675608	1.36126	0.173432	0.40865	5	X-Z	CPSF6 Knock-out
RP3-414A15.12	7.99473	-2.05018	1.44826	-1.41561	0.15689	NA	5	X-Z	CPSF6 Knock-out
RP11-110I1.12	560.064	0.475356	0.160578	2.96028	0.00307359	0.019737	5	X-Z	CPSF6 Knock-out
CTC-471J1.2	15.2372	-2.27073	0.977689	-2.32254	0.0202036	0.0886447	5	X-Z	CPSF6 Knock-out
GLI3	20.1563	-0.667404	0.836403	-0.797945	0.424902	0.684304	5	X-Z	CPSF6 Knock-out
TCN2	237.098	0.827949	0.287488	2.87995	0.00397743	0.0245197	5	X-Z	CPSF6 Knock-out
ATP6V0CP1	13.2675	0.782859	1.21072	0.646605	0.517888	NA	5	X-Z	CPSF6 Knock-out
VPS33A	4528.14	-0.120977	0.0742643	-1.629	0.103313	0.292502	5	X-Z	CPSF6 Knock-out
SLC4A9	13.4815	-0.479239	0.997633	-0.480375	0.63096	NA	5	X-Z	CPSF6 Knock-out
AC012358.4	67.7796	0.840157	0.510711	1.64507	0.099955	0.286375	5	X-Z	CPSF6 Knock-out
GNA13	15040.7	0.0365718	0.0484356	0.755059	0.450213	0.705387	5	X-Z	CPSF6 Knock-out
RAPGEF2	3484.65	-0.0994951	0.0714519	-1.39248	0.163778	0.394371	5	X-Z	CPSF6 Knock-out
CKAP4	1157.32	0.196501	0.112536	1.74612	0.0807903	0.246754	5	X-Z	CPSF6 Knock-out
ALG9	2676.01	-0.0936423	0.092323	-1.01429	0.310444	0.578723	5	X-Z	CPSF6 Knock-out
VPS13D	7968.81	0.148633	0.0614164	2.42008	0.0155172	0.0724395	5	X-Z	CPSF6 Knock-out
PDK1	8098.58	-0.441559	0.0533386	-8.27842	1.24824e-16	9.81665e-15	5	X-Z	CPSF6 Knock-out
MYCN	23.0044	0.136743	0.758563	0.180265	0.856944	0.942964	5	X-Z	CPSF6 Knock-out
RP11-164J13.1	449.886	-0.934275	0.194888	-4.7939	1.63569e-06	2.83338e-05	5	X-Z	CPSF6 Knock-out
H1FX-AS1	84.5399	0.864759	0.408404	2.11741	0.0342248	0.132434	5	X-Z	CPSF6 Knock-out
RP13-735L24.1	43.2156	-0.898375	0.680101	-1.32094	0.18652	0.428534	5	X-Z	CPSF6 Knock-out
CPM	3564.02	0.0200968	0.0763992	0.26305	0.792512	0.912473	5	X-Z	CPSF6 Knock-out
RP11-544I20.2	34.2288	1.72014	0.703024	2.44677	0.0144142	0.0686602	5	X-Z	CPSF6 Knock-out
PSMD13	22958.5	0.0947071	0.0383709	2.4682	0.0135794	0.0655028	5	X-Z	CPSF6 Knock-out
ESM1	15.2023	0.340549	0.934837	0.364287	0.715643	0.873129	5	X-Z	CPSF6 Knock-out
CTD-2267D19.1	95.6522	0.289095	0.384598	0.751681	0.452243	0.706971	5	X-Z	CPSF6 Knock-out
PSMB4	18735.8	-0.0139735	0.0428112	-0.326398	0.744123	0.887274	5	X-Z	CPSF6 Knock-out
CBLB	14472.9	0.0179286	0.0458535	0.390997	0.6958	0.864129	5	X-Z	CPSF6 Knock-out
RP11-486M23.1	16.0994	1.43385	1.08976	1.31574	0.18826	0.43094	5	X-Z	CPSF6 Knock-out
TM7SF2	1562.25	-0.133405	0.100119	-1.33247	0.182707	0.422661	5	X-Z	CPSF6 Knock-out
SCN11A	23.2796	0.205814	0.753359	0.273195	0.784703	0.908642	5	X-Z	CPSF6 Knock-out
NEDD9	4159.39	-0.192496	0.0633669	-3.0378	0.0023831	0.0159352	5	X-Z	CPSF6 Knock-out
MAMSTR	134.235	0.453514	0.317186	1.4298	0.152774	0.377417	5	X-Z	CPSF6 Knock-out
ACMSD	9.93505	0.261873	1.17394	0.223072	0.82348	NA	5	X-Z	CPSF6 Knock-out
TRAV23DV6	1284.92	0.140275	0.11457	1.22436	0.220818	0.474274	5	X-Z	CPSF6 Knock-out
BEND5	6040.67	0.00478002	0.0766484	0.062363	0.950274	0.981127	5	X-Z	CPSF6 Knock-out
COBLL1	46.1095	-0.918258	0.542348	-1.69312	0.0904332	0.267255	5	X-Z	CPSF6 Knock-out
DCAF16	3656.93	-0.923076	0.0771952	-11.9577	5.91857e-33	1.71594e-30	5	X-Z	CPSF6 Knock-out
NEK7	11399.6	-0.211447	0.0469498	-4.50369	6.67844e-06	9.84285e-05	5	X-Z	CPSF6 Knock-out
PLCD3	437.09	0.361515	0.18935	1.90924	0.0562309	0.190426	5	X-Z	CPSF6 Knock-out
BCKDHB	1443.59	-0.318929	0.11282	-2.82689	0.00470029	0.0281019	5	X-Z	CPSF6 Knock-out
XXbac-B444P24.13	56.1677	-0.0171923	0.548149	-0.0313643	0.974979	0.991302	5	X-Z	CPSF6 Knock-out
RP13-126P21.2	40.5666	1.58863	0.653518	2.4309	0.0150616	0.0708747	5	X-Z	CPSF6 Knock-out
BCORP1	456.186	-0.390264	0.211769	-1.84288	0.0653472	0.212767	5	X-Z	CPSF6 Knock-out
GALNT6	2838.78	0.146189	0.0772721	1.89187	0.0585083	0.19602	5	X-Z	CPSF6 Knock-out
PRPF19	20814.5	0.124212	0.0390682	3.17936	0.00147603	0.0107064	5	X-Z	CPSF6 Knock-out
ADCK3	4632.96	-0.110761	0.0706008	-1.56884	0.116686	0.317735	5	X-Z	CPSF6 Knock-out
SLC8B1	2402.69	-0.09721	0.0832008	-1.16838	0.242654	0.501324	5	X-Z	CPSF6 Knock-out
WDR74	4874.71	-0.0719757	0.0656801	-1.09585	0.273143	0.538715	5	X-Z	CPSF6 Knock-out
MUC20P1	430.054	-0.0921853	0.217134	-0.424555	0.671161	0.851208	5	X-Z	CPSF6 Knock-out
OTUD5	13049.4	0.177665	0.0434291	4.09093	4.29642e-05	0.000515491	5	X-Z	CPSF6 Knock-out
HNRNPH2	4129.42	0.167648	0.375429	0.44655	0.6552	0.843453	5	X-Z	CPSF6 Knock-out
SIAH2	8337.06	-0.0597046	0.0502288	-1.18865	0.234577	0.492442	5	X-Z	CPSF6 Knock-out
CSPG4P10	774.026	-0.161669	0.136624	-1.18331	0.236686	0.495061	5	X-Z	CPSF6 Knock-out
ZNF322	1030.44	-0.122282	0.119643	-1.02206	0.306754	0.575219	5	X-Z	CPSF6 Knock-out
CD24	106.585	0.115534	0.498002	0.231995	0.816542	0.924119	5	X-Z	CPSF6 Knock-out
GAK	12359.3	0.156547	0.0492839	3.17643	0.00149101	0.010799	5	X-Z	CPSF6 Knock-out
MRPS17P1	6.7241	0.648665	1.81621	0.357153	0.720977	NA	5	X-Z	CPSF6 Knock-out
GRAP2	8533.44	-0.260956	0.0492764	-5.29576	1.1852e-07	2.63114e-06	5	X-Z	CPSF6 Knock-out
PLSCR1	4197.89	0.0284157	0.0716645	0.39651	0.691729	0.862497	5	X-Z	CPSF6 Knock-out
PRRC2A	68760.2	0.0324525	0.0322493	1.0063	0.314271	0.582234	5	X-Z	CPSF6 Knock-out
SRP68P1	7.19139	0.505752	1.32772	0.380919	0.703263	NA	5	X-Z	CPSF6 Knock-out
RP1-27O5.3	46.9389	-0.647609	0.610623	-1.06057	0.288885	0.556353	5	X-Z	CPSF6 Knock-out
PI4KB	10217.1	0.0307379	0.0469474	0.654731	0.512641	0.752291	5	X-Z	CPSF6 Knock-out
RP11-61L23.2	5450.46	0.0473992	0.063927	0.741458	0.458416	0.713299	5	X-Z	CPSF6 Knock-out
KCNE1	8.00758	0.195241	1.51248	0.129087	0.897289	NA	5	X-Z	CPSF6 Knock-out
RPL23AP21	57.4658	0.912254	0.54405	1.67678	0.0935852	0.273862	5	X-Z	CPSF6 Knock-out
ERCC2	4167.24	0.104782	0.0652173	1.60666	0.108129	0.301739	5	X-Z	CPSF6 Knock-out
RP11-335F8.2	39.3315	-0.170728	0.594239	-0.287306	0.773878	0.903021	5	X-Z	CPSF6 Knock-out
CASP4	4593.6	0.109869	0.0672347	1.63411	0.102237	0.290258	5	X-Z	CPSF6 Knock-out
IGHV1-2	29.2457	0.462067	0.699609	0.660465	0.508956	0.750168	5	X-Z	CPSF6 Knock-out
MTAP	5266.11	-0.0318286	0.0603873	-0.527075	0.598141	0.808479	5	X-Z	CPSF6 Knock-out
DFNA5	1907.35	-0.0946173	0.094633	-0.999833	0.317391	0.585612	5	X-Z	CPSF6 Knock-out
SEC13P1	24.0663	0.472006	0.808941	0.583486	0.559566	0.7842	5	X-Z	CPSF6 Knock-out
EGFL8	299.771	-0.197619	0.241026	-0.819907	0.412269	0.67467	5	X-Z	CPSF6 Knock-out
HORMAD2	13.0108	0.17285	0.983979	0.175664	0.860558	NA	5	X-Z	CPSF6 Knock-out
POLR2K	4438.39	0.0277854	0.0681564	0.407672	0.683515	0.857524	5	X-Z	CPSF6 Knock-out
RP13-93L13.1	94.6968	0.385113	0.403196	0.95515	0.339502	0.607765	5	X-Z	CPSF6 Knock-out
TBC1D29	41.5986	2.13279	0.620858	3.43523	0.000592061	0.0049551	5	X-Z	CPSF6 Knock-out
ELAVL1	15564.9	-0.0983421	0.0443076	-2.21953	0.0264507	0.109204	5	X-Z	CPSF6 Knock-out
PPIL4	4756.28	0.032812	0.0772973	0.42449	0.671208	0.851208	5	X-Z	CPSF6 Knock-out
IL2RA	167863	0.461361	0.035025	13.1724	1.26579e-39	4.9176e-37	5	X-Z	CPSF6 Knock-out
PHIP	14079.5	-0.0304353	0.0416968	-0.729919	0.46544	0.71758	5	X-Z	CPSF6 Knock-out
TM9SF1	2882.14	0.0726437	0.111121	0.653735	0.513283	0.752492	5	X-Z	CPSF6 Knock-out
AC084809.2	8.33779	-0.0648328	1.40741	-0.0460653	0.963258	NA	5	X-Z	CPSF6 Knock-out
CBSL	2658.17	0.0353971	0.0784201	0.451378	0.651717	0.841393	5	X-Z	CPSF6 Knock-out
MTIF3	2129.7	-0.282375	0.0850309	-3.32085	0.00089744	0.00704924	5	X-Z	CPSF6 Knock-out
AL356750.1	21.59	0.480433	0.782019	0.614349	0.538984	0.770545	5	X-Z	CPSF6 Knock-out
RAB11B-AS1	136.034	0.176465	0.33664	0.524194	0.600143	0.809456	5	X-Z	CPSF6 Knock-out
GALNT8	289.451	-0.837354	0.69652	-1.2022	0.229287	0.485227	5	X-Z	CPSF6 Knock-out
KNSTRN	4130.04	0.481565	0.0861962	5.58685	2.31227e-08	5.83322e-07	5	X-Z	CPSF6 Knock-out
DDX11	9969.99	0.0530158	0.0472205	1.12273	0.261553	0.525242	5	X-Z	CPSF6 Knock-out
MAGI1	273.405	0.736249	0.250571	2.93828	0.00330036	0.0209851	5	X-Z	CPSF6 Knock-out
RPS18P12	142.405	-0.13766	0.319509	-0.430847	0.66658	0.849487	5	X-Z	CPSF6 Knock-out
DEPDC1	2907.01	0.380885	0.095619	3.98336	6.7948e-05	0.00076471	5	X-Z	CPSF6 Knock-out
CTSZ	5627.62	0.119711	0.0600739	1.99274	0.0462901	0.165504	5	X-Z	CPSF6 Knock-out
NDUFS3	4078.51	0.0679916	0.0675506	1.00653	0.314161	0.582196	5	X-Z	CPSF6 Knock-out
NFATC1	13106.3	0.463141	0.0486218	9.52539	1.6442e-21	1.97152e-19	5	X-Z	CPSF6 Knock-out
ZNF8	1042.17	-0.34786	0.123991	-2.80554	0.00502328	0.0296768	5	X-Z	CPSF6 Knock-out
LYN	1779.39	0.0339229	0.0949006	0.357457	0.72075	0.874981	5	X-Z	CPSF6 Knock-out
STRIP1	3281.49	0.0633601	0.0907005	0.698563	0.484825	0.732498	5	X-Z	CPSF6 Knock-out
ZNF890P	82.5114	-0.341164	0.413054	-0.825954	0.40883	0.671417	5	X-Z	CPSF6 Knock-out
MIS18BP1	13431.2	-0.291219	0.051535	-5.6509	1.59609e-08	4.21252e-07	5	X-Z	CPSF6 Knock-out
EDC3	7237.5	0.182326	0.0534588	3.41058	0.000648248	0.00535611	5	X-Z	CPSF6 Knock-out
PKI55	383.635	-3.318	0.222497	-14.9126	2.72911e-50	2.40968e-47	5	X-Z	CPSF6 Knock-out
RP11-455O6.2	9.13672	0.991308	1.22406	0.809856	0.418023	NA	5	X-Z	CPSF6 Knock-out
CTB-12A17.2	464.623	0.63328	0.190826	3.31862	0.000904628	0.00708875	5	X-Z	CPSF6 Knock-out
SUMO2P17	422.325	-0.123472	0.184012	-0.671001	0.50222	0.745111	5	X-Z	CPSF6 Knock-out
RP11-178H8.7	165.326	-1.2881	0.348827	-3.69266	0.000221919	0.00213405	5	X-Z	CPSF6 Knock-out
TSPAN9	63.1405	-0.865364	0.505816	-1.71083	0.0871128	0.260174	5	X-Z	CPSF6 Knock-out
EEF1DP1	46.7089	-0.210617	0.535419	-0.393369	0.694047	0.863402	5	X-Z	CPSF6 Knock-out
GGA3	9897.55	0.00576431	0.0472592	0.121972	0.902921	0.961603	5	X-Z	CPSF6 Knock-out
AC002310.12	308.496	0.724298	0.218892	3.30892	0.000936552	0.0073033	5	X-Z	CPSF6 Knock-out
TMEM206	954.239	0.0625941	0.126763	0.493788	0.621456	0.823113	5	X-Z	CPSF6 Knock-out
CARD6	583.655	-0.196243	0.176329	-1.11294	0.265734	0.530075	5	X-Z	CPSF6 Knock-out
UBOX5	1518.05	-0.0376777	0.100103	-0.376388	0.706628	0.869452	5	X-Z	CPSF6 Knock-out
WWC2	254.959	0.19543	0.256139	0.762985	0.445472	0.701431	5	X-Z	CPSF6 Knock-out
CDRT4	156.5	-0.0635735	0.480506	-0.132305	0.894743	0.957702	5	X-Z	CPSF6 Knock-out
DVL3	6750.22	0.0834233	0.0550165	1.51633	0.129436	0.338899	5	X-Z	CPSF6 Knock-out
CERS4	1527.72	0.187564	0.106119	1.76749	0.0771461	0.238549	5	X-Z	CPSF6 Knock-out
NSL1	3012.32	-0.366263	0.0804085	-4.55503	5.23785e-06	7.98002e-05	5	X-Z	CPSF6 Knock-out
RP11-449J21.3	268.065	-0.215456	0.255736	-0.842495	0.399511	0.664004	5	X-Z	CPSF6 Knock-out
PLCG1	53187.8	0.0868775	0.0396846	2.1892	0.0285824	0.115694	5	X-Z	CPSF6 Knock-out
M6PR	13082.9	0.0336027	0.0434448	0.773457	0.439252	0.696769	5	X-Z	CPSF6 Knock-out
IQCH	109.608	0.0553783	0.392504	0.14109	0.887799	0.955297	5	X-Z	CPSF6 Knock-out
SOWAHD	23.8595	-0.132047	0.759794	-0.173793	0.862028	0.944865	5	X-Z	CPSF6 Knock-out
TTTY14	52.3501	0.279301	0.500892	0.557607	0.577113	0.794164	5	X-Z	CPSF6 Knock-out
EXOSC3	5235.37	0.165922	0.0580994	2.85582	0.00429252	0.026	5	X-Z	CPSF6 Knock-out
RP11-365H23.1	35.986	0.771638	0.674886	1.14336	0.252889	0.515464	5	X-Z	CPSF6 Knock-out
ZNF428	503.993	-0.244974	0.165623	-1.4791	0.139112	0.354759	5	X-Z	CPSF6 Knock-out
RP11-443B7.2	57.0777	-0.978304	0.598921	-1.63344	0.102376	0.290525	5	X-Z	CPSF6 Knock-out
FERMT1	66.0379	0.115786	0.497026	0.232958	0.815794	0.923743	5	X-Z	CPSF6 Knock-out
AC083843.1	718.085	-0.0319038	0.147054	-0.216953	0.828245	0.92863	5	X-Z	CPSF6 Knock-out
MT-CYB	230061	-0.0697408	0.0433599	-1.60842	0.107744	0.300967	5	X-Z	CPSF6 Knock-out
RP11-190A12.8	14.6701	0.438386	1.01366	0.43248	0.665393	NA	5	X-Z	CPSF6 Knock-out
GSN	449.506	0.181623	0.174471	1.041	0.297878	0.56537	5	X-Z	CPSF6 Knock-out
RPSAP45	10.3766	-0.450506	1.10138	-0.409038	0.682512	NA	5	X-Z	CPSF6 Knock-out
C4orf19	27.5579	-0.405196	0.726266	-0.557916	0.576902	0.794042	5	X-Z	CPSF6 Knock-out
CTB-58E17.1	735.022	0.185592	0.141845	1.30841	0.190733	0.434247	5	X-Z	CPSF6 Knock-out
CSTF2	6906.85	0.231753	0.0552484	4.19473	2.73192e-05	0.00034348	5	X-Z	CPSF6 Knock-out
CD3G	12078.5	0.112757	0.0501406	2.24881	0.0245244	0.102825	5	X-Z	CPSF6 Knock-out
TMEM139	119.355	0.00101798	0.339569	0.00299784	0.997608	0.99929	5	X-Z	CPSF6 Knock-out
TUBB2BP1	10.8814	-1.02134	1.26351	-0.808331	0.4189	NA	5	X-Z	CPSF6 Knock-out
ARHGAP5	9703.7	0.248973	0.048836	5.09814	3.43001e-07	6.94764e-06	5	X-Z	CPSF6 Knock-out
RP11-426C22.8	32.0482	-0.286141	0.675574	-0.423553	0.671892	0.851426	5	X-Z	CPSF6 Knock-out
YLPM1	19076.5	0.0629579	0.0394757	1.59485	0.110745	0.306661	5	X-Z	CPSF6 Knock-out
WNT10A	546.751	0.429139	0.177964	2.41138	0.0158924	0.0737128	5	X-Z	CPSF6 Knock-out
PPM1J	153.695	0.550857	0.327098	1.68407	0.0921682	0.271144	5	X-Z	CPSF6 Knock-out
PHYKPL	4621.5	-0.198161	0.0651844	-3.04001	0.00236567	0.0158241	5	X-Z	CPSF6 Knock-out
NUP88	9915.81	0.129434	0.0518137	2.49805	0.0124877	0.0615044	5	X-Z	CPSF6 Knock-out
DPY19L2	157.271	0.393958	0.320897	1.22768	0.219568	0.472692	5	X-Z	CPSF6 Knock-out
SLAMF8	46.3389	-0.177948	0.601076	-0.296049	0.767193	0.899637	5	X-Z	CPSF6 Knock-out
RP11-897M7.1	21.5395	-0.285756	0.793095	-0.360305	0.718619	0.874142	5	X-Z	CPSF6 Knock-out
SNX25P1	83.7757	0.119682	0.424737	0.281779	0.778113	0.904613	5	X-Z	CPSF6 Knock-out
ANXA2P1	39.4016	-0.145399	0.580918	-0.250292	0.802362	0.917461	5	X-Z	CPSF6 Knock-out
GCNT4	517.216	-0.144255	0.164709	-0.875817	0.381129	0.646306	5	X-Z	CPSF6 Knock-out
VSIG10L	520.906	0.545525	0.179846	3.03329	0.00241905	0.0161256	5	X-Z	CPSF6 Knock-out
SMCO4	1410.79	0.0264083	0.101669	0.259748	0.795059	0.91326	5	X-Z	CPSF6 Knock-out
MB21D1	4039.74	-0.0353939	0.0662864	-0.533954	0.593373	0.805357	5	X-Z	CPSF6 Knock-out
FAM179B	1309.99	0.0838766	0.105016	0.798703	0.424462	0.684019	5	X-Z	CPSF6 Knock-out
RP11-465N4.4	23.3301	-0.161941	0.741791	-0.218312	0.827186	0.928325	5	X-Z	CPSF6 Knock-out
HN1	9904.43	-0.119285	0.0468921	-2.54382	0.0109646	0.0554655	5	X-Z	CPSF6 Knock-out
PCGF1	1165.13	-0.226674	0.133305	-1.70042	0.0890526	0.264341	5	X-Z	CPSF6 Knock-out
RP11-342K2.1	30.8598	-0.807845	0.752139	-1.07406	0.282794	0.548788	5	X-Z	CPSF6 Knock-out
RP11-492M23.2	91.3203	0.0052472	0.381775	0.0137442	0.989034	0.997115	5	X-Z	CPSF6 Knock-out
JAZF1	510.113	-0.289047	0.188814	-1.53086	0.125805	0.332847	5	X-Z	CPSF6 Knock-out
CNTF	124.751	7.77925	2.69365	2.888	0.00387704	0.0239999	5	X-Z	CPSF6 Knock-out
HAUS5	5824.7	0.00147471	0.0575342	0.0256318	0.979551	0.9929	5	X-Z	CPSF6 Knock-out
CPPED1	4419.81	-0.0715125	0.068284	-1.04728	0.29497	0.562808	5	X-Z	CPSF6 Knock-out
ITGB1BP2	190.578	0.374521	0.273145	1.37114	0.17033	0.404186	5	X-Z	CPSF6 Knock-out
FNDC3B	1410.69	0.570647	0.103552	5.51072	3.57377e-08	8.76522e-07	5	X-Z	CPSF6 Knock-out
KREMEN1	51.7682	-0.420951	0.547305	-0.769133	0.441814	0.698944	5	X-Z	CPSF6 Knock-out
YBX2	188.024	0.163318	0.279294	0.584753	0.558714	0.783656	5	X-Z	CPSF6 Knock-out
DBH	113.49	-0.560776	0.378347	-1.48217	0.138295	0.353471	5	X-Z	CPSF6 Knock-out
METTL23	1502.46	-0.11603	0.0991627	-1.1701	0.24196	0.500637	5	X-Z	CPSF6 Knock-out
CLEC7A	16.0135	0.505358	0.964812	0.523789	0.600426	0.809717	5	X-Z	CPSF6 Knock-out
HNRNPA1P16	118.341	0.640507	0.359397	1.78217	0.0747214	0.233505	5	X-Z	CPSF6 Knock-out
GFI1B	11.1955	0.23623	1.34027	0.176256	0.860093	NA	5	X-Z	CPSF6 Knock-out
SF3B3	40591.7	-0.163651	0.0359987	-4.54603	5.46673e-06	8.25106e-05	5	X-Z	CPSF6 Knock-out
RP5-1041C10.3	16.4078	-0.787935	0.98933	-0.796433	0.425781	0.684895	5	X-Z	CPSF6 Knock-out
MTCO1P12	62778.2	-0.168159	0.0522633	-3.21753	0.00129298	0.00958268	5	X-Z	CPSF6 Knock-out
RP4-591C20.9	1164.6	0.430291	0.123897	3.47299	0.000514699	0.00440939	5	X-Z	CPSF6 Knock-out
SHPRH	3408.06	-0.270275	0.075363	-3.58631	0.000335395	0.00304901	5	X-Z	CPSF6 Knock-out
MAP7D1	18042.6	0.147953	0.0417658	3.54245	0.00039643	0.00352069	5	X-Z	CPSF6 Knock-out
RAF1	12952.9	0.0050605	0.0447493	0.113086	0.909963	0.964954	5	X-Z	CPSF6 Knock-out
NR1H3	602.662	-0.164808	0.156471	-1.05328	0.292211	0.559372	5	X-Z	CPSF6 Knock-out
PINK1	227.575	0.57726	0.252455	2.28658	0.0222202	0.095303	5	X-Z	CPSF6 Knock-out
ADGRA2	57.4956	-0.468948	0.585935	-0.800341	0.423513	0.683267	5	X-Z	CPSF6 Knock-out
CLDN20	45.566	-0.789876	0.591756	-1.3348	0.181942	0.421543	5	X-Z	CPSF6 Knock-out
POT1-AS1	12.3133	-1.74856	1.24674	-1.40251	0.160764	NA	5	X-Z	CPSF6 Knock-out
SLC7A11	317.262	0.044974	0.239589	0.187713	0.851102	0.940477	5	X-Z	CPSF6 Knock-out
SCPEP1	2385.23	0.154956	0.0834508	1.85685	0.0633321	0.207493	5	X-Z	CPSF6 Knock-out
ANKRD33B	3459.97	0.305558	0.0741325	4.12179	3.75944e-05	0.000456419	5	X-Z	CPSF6 Knock-out
C17orf97	122.277	0.312475	0.338675	0.92264	0.356195	0.623397	5	X-Z	CPSF6 Knock-out
GTF2F2	2980.49	-0.133462	0.0809693	-1.6483	0.0992905	0.285102	5	X-Z	CPSF6 Knock-out
TRIM72	24.0232	0.407871	0.808881	0.504241	0.614092	0.818102	5	X-Z	CPSF6 Knock-out
THBS4	296.383	0.264337	0.239831	1.10218	0.270383	0.53551	5	X-Z	CPSF6 Knock-out
RP11-53O19.3	122.608	-3.04658	0.375993	-8.10275	5.37295e-16	3.9534e-14	5	X-Z	CPSF6 Knock-out
CERS3	15.7727	-3.18425	1.35831	-2.34427	0.0190644	0.084937	5	X-Z	CPSF6 Knock-out
ADAM19	49325.3	-0.173627	0.0341014	-5.09149	3.55252e-07	7.15106e-06	5	X-Z	CPSF6 Knock-out
SMAD4	7029	-0.0502916	0.0540167	-0.931039	0.351833	0.619447	5	X-Z	CPSF6 Knock-out
TTC32	1143.41	0.643318	0.119956	5.36296	8.18695e-08	1.8798e-06	5	X-Z	CPSF6 Knock-out
RP11-392E22.5	36.8883	-1.93578	0.791296	-2.44635	0.0144312	0.0686904	5	X-Z	CPSF6 Knock-out
FAM87B	41.673	0.545203	0.648008	0.841352	0.400151	0.66475	5	X-Z	CPSF6 Knock-out
CTB-33G10.1	96.0334	-0.00132505	0.379777	-0.00348901	0.997216	0.99929	5	X-Z	CPSF6 Knock-out
SIGLEC5	8.97466	1.92387	1.34382	1.43164	0.152248	NA	5	X-Z	CPSF6 Knock-out
KCNK1	411.342	0.095322	0.21322	0.44706	0.654831	0.843284	5	X-Z	CPSF6 Knock-out
TMEM106A	1451	0.25989	0.10393	2.50062	0.0123975	0.0611377	5	X-Z	CPSF6 Knock-out
RP11-536C12.1	13.5538	-0.928337	1.02701	-0.903926	0.366035	NA	5	X-Z	CPSF6 Knock-out
ARMC10	3241.63	-0.0762791	0.0704825	-1.08224	0.279145	0.544916	5	X-Z	CPSF6 Knock-out
C10orf95	76.6652	-0.0719659	0.417899	-0.172209	0.863273	0.945492	5	X-Z	CPSF6 Knock-out
ETNK2	80.8828	0.115169	0.440937	0.26119	0.793946	0.912838	5	X-Z	CPSF6 Knock-out
UQCRFS1P1	293.87	-0.0831807	0.215251	-0.386435	0.699174	0.865502	5	X-Z	CPSF6 Knock-out
XRCC1	5540.39	0.185869	0.0569417	3.26419	0.00109776	0.00834926	5	X-Z	CPSF6 Knock-out
RBM48	1917.98	0.0526481	0.0933749	0.563836	0.572866	0.791741	5	X-Z	CPSF6 Knock-out
PXDN	514.191	-0.644189	0.175482	-3.67098	0.000241625	0.00228952	5	X-Z	CPSF6 Knock-out
MAP2K7	5492.45	0.0539915	0.0663445	0.813805	0.415756	0.677591	5	X-Z	CPSF6 Knock-out
OLFM1	14.2348	0.761789	1.03549	0.735678	0.461927	NA	5	X-Z	CPSF6 Knock-out
ZFP14	423.673	-0.579522	0.202373	-2.86364	0.00418806	0.0255265	5	X-Z	CPSF6 Knock-out
RP11-686D22.9	10.6805	0.692849	1.08293	0.639793	0.522307	NA	5	X-Z	CPSF6 Knock-out
TOP2B	45314.1	0.164542	0.0368923	4.46006	8.19382e-06	0.000117639	5	X-Z	CPSF6 Knock-out
RP6-159A1.4	13.0517	-0.140138	1.24123	-0.112903	0.910107	NA	5	X-Z	CPSF6 Knock-out
USP9Y	5742.54	0.170966	0.068867	2.48255	0.0130446	0.0634591	5	X-Z	CPSF6 Knock-out
ADGRE2	618.075	-0.682718	0.185993	-3.67067	0.000241914	0.00229005	5	X-Z	CPSF6 Knock-out
LINC00865	50.2342	0.217271	0.559003	0.388676	0.697516	0.864758	5	X-Z	CPSF6 Knock-out
FUT1	29.7652	-0.575233	0.720501	-0.798379	0.424651	0.68404	5	X-Z	CPSF6 Knock-out
ORM2	33.466	-0.55565	0.629353	-0.882891	0.377295	0.64305	5	X-Z	CPSF6 Knock-out
AC004471.9	14.352	1.56639	0.95228	1.64489	0.0999931	NA	5	X-Z	CPSF6 Knock-out
ARL4C	25025.7	-0.323672	0.0385083	-8.40524	4.26994e-17	3.55981e-15	5	X-Z	CPSF6 Knock-out
TIAL1	17330.1	-0.0338164	0.0489737	-0.690503	0.489878	0.736581	5	X-Z	CPSF6 Knock-out
R3HCC1L	3253.45	0.0808491	0.0926217	0.872896	0.38272	0.647646	5	X-Z	CPSF6 Knock-out
UCK1	2628.87	0.00193272	0.078356	0.0246659	0.980321	0.993258	5	X-Z	CPSF6 Knock-out
LYPD6B	12.4828	4.42977	1.59862	2.77099	0.00558859	NA	5	X-Z	CPSF6 Knock-out
PTCD2	1183.67	-0.156197	0.115206	-1.35581	0.17516	0.411027	5	X-Z	CPSF6 Knock-out
RGCC	7296.75	0.26902	0.0568242	4.73424	2.1988e-06	3.69159e-05	5	X-Z	CPSF6 Knock-out
ZNF623	3297.34	-0.326263	0.0772805	-4.2218	2.42362e-05	0.000309323	5	X-Z	CPSF6 Knock-out
PHYH	1509.45	-0.0285912	0.104056	-0.274766	0.783496	0.907862	5	X-Z	CPSF6 Knock-out
FAM57B	212.727	-0.455493	0.255721	-1.78121	0.0748782	0.233844	5	X-Z	CPSF6 Knock-out
AC006547.13	181.042	-0.189465	0.291262	-0.650496	0.515372	0.753962	5	X-Z	CPSF6 Knock-out
RP11-110I1.5	41.9741	0.086444	0.606543	0.142519	0.88667	0.95505	5	X-Z	CPSF6 Knock-out
APOA1BP	4497.12	0.152632	0.0654507	2.33202	0.0196998	0.0869901	5	X-Z	CPSF6 Knock-out
ARHGAP15	9632.77	-0.0755711	0.0519321	-1.45519	0.145616	0.365688	5	X-Z	CPSF6 Knock-out
PPP1R21	3898.08	-0.45567	0.0777733	-5.85896	4.65779e-09	1.35649e-07	5	X-Z	CPSF6 Knock-out
RGS12	1271.66	0.198641	0.114143	1.74029	0.081809	0.248798	5	X-Z	CPSF6 Knock-out
LYSMD2	844.2	-0.0497082	0.134605	-0.369289	0.711912	0.871606	5	X-Z	CPSF6 Knock-out
TUBA4B	27.893	0.235998	0.690721	0.341668	0.7326	0.881254	5	X-Z	CPSF6 Knock-out
TTC28-AS1_2	75.6544	1.13365	0.463071	2.44812	0.0143604	0.0684544	5	X-Z	CPSF6 Knock-out
PIK3C2B	6463.4	-0.125706	0.0601782	-2.0889	0.036717	0.139675	5	X-Z	CPSF6 Knock-out
HMGN3	3837.76	-0.00986584	0.0710009	-0.138954	0.889487	0.956028	5	X-Z	CPSF6 Knock-out
AC064834.2	32.0131	0.930477	0.660418	1.40892	0.158859	0.386695	5	X-Z	CPSF6 Knock-out
FAM122B	6352.71	-0.811211	0.0540013	-15.0221	5.26395e-51	5.38169e-48	5	X-Z	CPSF6 Knock-out
NSMCE2	3743.83	0.130726	0.0700923	1.86505	0.0621743	0.204736	5	X-Z	CPSF6 Knock-out
RN7SL832P	32.9584	0.329751	0.65511	0.503352	0.614717	0.818561	5	X-Z	CPSF6 Knock-out
WDR17	217.431	0.273189	0.290015	0.941982	0.346202	0.614153	5	X-Z	CPSF6 Knock-out
TRAV26-1	956.609	0.169202	0.124182	1.36253	0.173032	0.40805	5	X-Z	CPSF6 Knock-out
AVPI1	151.363	-0.03507	0.303818	-0.115431	0.908103	0.963991	5	X-Z	CPSF6 Knock-out
CTD-2310F14.1	35.7253	-0.0514414	0.621984	-0.0827054	0.934086	0.975098	5	X-Z	CPSF6 Knock-out
SRRT	31921.7	0.198717	0.0376923	5.2721	1.34873e-07	2.95701e-06	5	X-Z	CPSF6 Knock-out
UBE4A	11781.5	0.150826	0.0529035	2.85096	0.00435869	0.0263351	5	X-Z	CPSF6 Knock-out
MUS81	7042.15	0.1192	0.060001	1.98663	0.0469634	0.1672	5	X-Z	CPSF6 Knock-out
INCENP	16349.7	0.172386	0.0411039	4.19391	2.74193e-05	0.000344515	5	X-Z	CPSF6 Knock-out
TBC1D3H	177.52	-0.494086	0.420521	-1.17494	0.24002	0.498428	5	X-Z	CPSF6 Knock-out
CTSH	3948.49	0.117623	0.0683737	1.7203	0.0853775	0.256608	5	X-Z	CPSF6 Knock-out
UBE2D4	843.41	-0.010699	0.140259	-0.0762804	0.939196	0.97681	5	X-Z	CPSF6 Knock-out
THAP4	5351.39	0.0701584	0.0707143	0.992139	0.32113	0.589932	5	X-Z	CPSF6 Knock-out
SUGCT	74.5902	-0.0970543	0.461417	-0.21034	0.833403	0.931426	5	X-Z	CPSF6 Knock-out
FSIP1	53.3126	0.53697	0.511051	1.05072	0.293389	0.561135	5	X-Z	CPSF6 Knock-out
ZBED1	6996.13	0.202363	0.0572817	3.53277	0.000411238	0.00363104	5	X-Z	CPSF6 Knock-out
METTL16	7378.89	0.00406107	0.0559116	0.0726338	0.942098	0.978106	5	X-Z	CPSF6 Knock-out
STAT5A	26715.8	-0.0818441	0.0396958	-2.06178	0.0392285	0.146823	5	X-Z	CPSF6 Knock-out
ISL2	24.7792	1.08241	0.998812	1.0837	0.278499	0.54436	5	X-Z	CPSF6 Knock-out
TRBJ1-5	229.523	0.186242	0.254617	0.73146	0.464498	0.717089	5	X-Z	CPSF6 Knock-out
USP36	9954.73	-0.146741	0.0484298	-3.02998	0.00244572	0.0162716	5	X-Z	CPSF6 Knock-out
MKNK1-AS1	38.3645	-0.363362	0.638176	-0.569375	0.569101	0.789662	5	X-Z	CPSF6 Knock-out
CYTH4	10192.2	0.210049	0.0467267	4.49527	6.94811e-06	0.000101829	5	X-Z	CPSF6 Knock-out
ACVR2A	259.135	-0.333152	0.27069	-1.23075	0.218415	0.470993	5	X-Z	CPSF6 Knock-out
bP-21264C1.2	17.1698	0.906461	0.890844	1.01753	0.308901	0.577128	5	X-Z	CPSF6 Knock-out
RBM28	6679.05	0.202836	0.0564594	3.59259	0.000327405	0.00298584	5	X-Z	CPSF6 Knock-out
AF131215.3	41.2061	-0.360862	0.574437	-0.628201	0.529872	0.764544	5	X-Z	CPSF6 Knock-out
C19orf53	8435.62	0.0524716	0.0561535	0.934432	0.350081	0.618152	5	X-Z	CPSF6 Knock-out
RP11-573D15.2	108.421	-0.255854	0.374244	-0.683655	0.494193	0.739376	5	X-Z	CPSF6 Knock-out
RN7SL600P	10.4225	0.931675	1.09838	0.848226	0.396312	NA	5	X-Z	CPSF6 Knock-out
SLAMF1	16075.6	0.314179	0.0418244	7.51187	5.82897e-14	3.39005e-12	5	X-Z	CPSF6 Knock-out
RBM20	53.2022	0.547766	0.571677	0.958173	0.337975	0.606183	5	X-Z	CPSF6 Knock-out
UGDH-AS1	31.9024	-1.07677	0.654354	-1.64555	0.0998571	0.286269	5	X-Z	CPSF6 Knock-out
ZBED9	122.002	0.288085	0.354503	0.812646	0.416421	0.67798	5	X-Z	CPSF6 Knock-out
H3F3A	15723.3	-0.0530657	0.0417383	-1.27139	0.203589	0.451041	5	X-Z	CPSF6 Knock-out
PGAP1	7174.21	-0.470091	0.0699059	-6.72463	1.7604e-11	7.6672e-10	5	X-Z	CPSF6 Knock-out
RORC	1512.59	0.101111	0.101937	0.9919	0.321246	0.589979	5	X-Z	CPSF6 Knock-out
PCSK4	200.807	-0.132637	0.262151	-0.505957	0.612887	0.817336	5	X-Z	CPSF6 Knock-out
AKAP9	14110	-0.0935695	0.0511736	-1.82847	0.0674787	0.218026	5	X-Z	CPSF6 Knock-out
RP11-2B6.2	188.331	0.0864185	0.302373	0.2858	0.775031	0.903656	5	X-Z	CPSF6 Knock-out
SNX19	5290.22	0.130768	0.059073	2.21366	0.0268519	0.110391	5	X-Z	CPSF6 Knock-out
RP11-311C24.1	62.9326	-4.46641	0.750836	-5.94858	2.70477e-09	8.17109e-08	5	X-Z	CPSF6 Knock-out
RP11-555M1.3	20.1376	2.71925	1.0144	2.68066	0.00734781	0.0401043	5	X-Z	CPSF6 Knock-out
GTSE1-AS1	46.4947	0.719267	0.576053	1.24861	0.211807	0.462079	5	X-Z	CPSF6 Knock-out
ZNF570	742.491	-0.177676	0.147992	-1.20058	0.229915	0.486088	5	X-Z	CPSF6 Knock-out
H3F3BP1	112.74	0.108816	0.344579	0.315793	0.75216	0.89193	5	X-Z	CPSF6 Knock-out
TPRN	1337.64	0.0369547	0.11681	0.316366	0.751725	0.891719	5	X-Z	CPSF6 Knock-out
RP11-64B16.2	13.134	-0.289475	0.982425	-0.294654	0.768258	NA	5	X-Z	CPSF6 Knock-out
RP11-661O13.1	11.0928	-1.8628	1.23869	-1.50385	0.132621	NA	5	X-Z	CPSF6 Knock-out
AL023806.1	15.3101	1.64195	0.990422	1.65783	0.0973518	0.281531	5	X-Z	CPSF6 Knock-out
CTB-25B13.9	19.613	0.233326	0.88141	0.264719	0.791226	0.911923	5	X-Z	CPSF6 Knock-out
RP11-146F11.1	81.7862	0.523821	0.503097	1.04119	0.297786	0.56537	5	X-Z	CPSF6 Knock-out
GPR101	22.0838	0.738457	1.0743	0.687383	0.491842	0.738068	5	X-Z	CPSF6 Knock-out
CTD-2621I17.3	62.6999	-0.127722	0.480878	-0.265602	0.790546	0.91169	5	X-Z	CPSF6 Knock-out
AKR7A3	38.5167	-0.165674	0.583104	-0.284123	0.776316	0.904098	5	X-Z	CPSF6 Knock-out
MED14	8291.04	-0.138886	0.0518704	-2.67757	0.00741594	0.0403575	5	X-Z	CPSF6 Knock-out
RP11-142L4.2	207.159	0.00913211	0.257368	0.0354827	0.971695	0.989189	5	X-Z	CPSF6 Knock-out
MGLL	148.564	-0.15982	0.330389	-0.483732	0.628576	0.826663	5	X-Z	CPSF6 Knock-out
RP11-104H15.10	1712.78	0.166313	0.0958558	1.73503	0.0827347	0.251107	5	X-Z	CPSF6 Knock-out
YBX1P10	2395.26	-0.032617	0.0815546	-0.39994	0.689201	0.861224	5	X-Z	CPSF6 Knock-out
RP11-77P6.2	108.142	-0.440443	0.502369	-0.87673	0.380633	0.645972	5	X-Z	CPSF6 Knock-out
SNHG20	959.997	0.0280442	0.126497	0.221698	0.824549	0.927628	5	X-Z	CPSF6 Knock-out
AIFM3	18.2787	0.539413	0.928996	0.580641	0.561483	0.785509	5	X-Z	CPSF6 Knock-out
RP11-57K17.1	39.6978	0.300803	0.585158	0.514055	0.607214	0.813702	5	X-Z	CPSF6 Knock-out
ANKAR	247.795	0.0502979	0.260178	0.193321	0.846707	0.938558	5	X-Z	CPSF6 Knock-out
ACBD4	1231.8	-0.0371919	0.123599	-0.300907	0.763486	0.898192	5	X-Z	CPSF6 Knock-out
RP11-227G15.12	15.8065	-0.561598	0.904506	-0.620889	0.534672	0.767799	5	X-Z	CPSF6 Knock-out
EDNRA	15.6934	-0.660493	0.935538	-0.706003	0.480186	0.729197	5	X-Z	CPSF6 Knock-out
SNHG14	3641.55	0.776191	0.0672392	11.5437	7.93958e-31	2.00294e-28	5	X-Z	CPSF6 Knock-out
TRAV5	293.372	0.075733	0.233916	0.323762	0.746118	0.888415	5	X-Z	CPSF6 Knock-out
STX8P1	14.6351	-0.739496	1.01173	-0.730923	0.464826	NA	5	X-Z	CPSF6 Knock-out
CTC-523E23.5	59.9459	0.130128	0.523295	0.24867	0.803616	0.918048	5	X-Z	CPSF6 Knock-out
ILDR1	150.822	0.141579	0.304388	0.465128	0.64184	0.835582	5	X-Z	CPSF6 Knock-out
NOP2	10351.7	-0.0632983	0.047256	-1.33948	0.180415	0.419191	5	X-Z	CPSF6 Knock-out
ZFAND2B	1957.31	0.0073287	0.0880969	0.083189	0.933701	0.975098	5	X-Z	CPSF6 Knock-out
PTTG1	6963.53	0.192786	0.0657319	2.93292	0.0033579	0.0213021	5	X-Z	CPSF6 Knock-out
RPL7L1	23175.8	-0.283523	0.0373966	-7.58152	3.41537e-14	2.04134e-12	5	X-Z	CPSF6 Knock-out
MRRF	3880.16	-0.112602	0.0732311	-1.53762	0.124142	0.33011	5	X-Z	CPSF6 Knock-out
SLC25A29	1751.76	-0.259654	0.0958878	-2.7079	0.00677112	0.0376422	5	X-Z	CPSF6 Knock-out
CDC42EP3	2058.47	-0.113086	0.0907542	-1.24606	0.212741	0.46315	5	X-Z	CPSF6 Knock-out
ZNF2	730.2	-0.0295423	0.138444	-0.213388	0.831024	0.930396	5	X-Z	CPSF6 Knock-out
DCP1A	8225.35	-0.169958	0.0500097	-3.3985	0.000677575	0.00556999	5	X-Z	CPSF6 Knock-out
ISM1	16.3499	-2.54192	1.06748	-2.38123	0.0172551	0.0785334	5	X-Z	CPSF6 Knock-out
APPL1	9195.16	-0.289059	0.0521927	-5.5383	3.05429e-08	7.57635e-07	5	X-Z	CPSF6 Knock-out
PPIP5K2	7218.68	-0.195414	0.0570272	-3.42668	0.000611013	0.00509615	5	X-Z	CPSF6 Knock-out
RP11-326K13.4	30.3972	0.632528	0.709743	0.891207	0.372818	0.638286	5	X-Z	CPSF6 Knock-out
RPL7	164164	-0.0141968	0.0354737	-0.400205	0.689005	0.861091	5	X-Z	CPSF6 Knock-out
ACCS	1295.23	-0.153139	0.108199	-1.41535	0.156966	0.383597	5	X-Z	CPSF6 Knock-out
WDR12	5653.87	-0.11987	0.0601119	-1.99411	0.0461397	0.165118	5	X-Z	CPSF6 Knock-out
EEF2	361280	-0.136627	0.0400545	-3.41102	0.000647207	0.00534978	5	X-Z	CPSF6 Knock-out
TRBV5-4	577.644	0.289166	0.156254	1.85061	0.064225	0.209782	5	X-Z	CPSF6 Knock-out
KLHL21	4491.99	-0.000649833	0.0615164	-0.0105636	0.991572	0.997613	5	X-Z	CPSF6 Knock-out
TTBK1	204.983	0.190299	0.264915	0.718338	0.472549	0.723183	5	X-Z	CPSF6 Knock-out
HYOU1	14462	0.278256	0.0514951	5.40355	6.53339e-08	1.51808e-06	5	X-Z	CPSF6 Knock-out
PRMT7	4116.67	0.011377	0.0643836	0.176706	0.859739	0.943969	5	X-Z	CPSF6 Knock-out
ZNF300	104.019	0.0285897	0.368328	0.0776202	0.93813	0.976331	5	X-Z	CPSF6 Knock-out
BABAM1	7888.22	-0.00264749	0.0505146	-0.0524105	0.958202	0.983778	5	X-Z	CPSF6 Knock-out
CTC-338M12.13	18.4135	-0.594372	0.86944	-0.683626	0.494212	0.739376	5	X-Z	CPSF6 Knock-out
TRIM44	6986.34	-0.337675	0.0586695	-5.75554	8.63645e-09	2.40348e-07	5	X-Z	CPSF6 Knock-out
AKR7L	74.9919	-0.347729	0.482657	-0.720447	0.47125	0.721926	5	X-Z	CPSF6 Knock-out
ZNF578	49.9494	0.619426	0.529863	1.16903	0.242391	0.501059	5	X-Z	CPSF6 Knock-out
USP43	156.039	0.272071	0.353996	0.768572	0.442148	0.699036	5	X-Z	CPSF6 Knock-out
RAB30-AS1	594.36	0.667713	0.193068	3.45844	0.000543313	0.00462685	5	X-Z	CPSF6 Knock-out
C7orf73	1633.38	-0.499832	0.0989231	-5.05274	4.35524e-07	8.57148e-06	5	X-Z	CPSF6 Knock-out
PHBP9	84.6861	0.0671543	0.409276	0.164081	0.869668	0.948715	5	X-Z	CPSF6 Knock-out
LINC00310	25.728	-0.459995	0.802133	-0.573465	0.56633	0.788034	5	X-Z	CPSF6 Knock-out
ABHD14A	673.861	0.195422	0.157456	1.24112	0.21456	0.465923	5	X-Z	CPSF6 Knock-out
LINC00205	142.137	-0.599204	0.315634	-1.89841	0.057642	0.193781	5	X-Z	CPSF6 Knock-out
CRK	2473.06	0.125427	0.085076	1.4743	0.140402	0.356967	5	X-Z	CPSF6 Knock-out
PPP1R16A	1540.2	0.327084	0.108472	3.01538	0.00256655	0.0169173	5	X-Z	CPSF6 Knock-out
FAM83F	60.8443	0.904803	0.518599	1.74471	0.0810358	0.247231	5	X-Z	CPSF6 Knock-out
MFSD14B	6632.93	-0.0442244	0.0563181	-0.785261	0.4323	0.690798	5	X-Z	CPSF6 Knock-out
RP4-635E18.8	99.0831	0.244396	0.395401	0.618096	0.536512	0.768906	5	X-Z	CPSF6 Knock-out
RP11-568G11.4	13.394	-0.564495	1.02503	-0.550709	0.581833	NA	5	X-Z	CPSF6 Knock-out
PMPCA	12671.9	0.243519	0.0443439	5.49159	3.9833e-08	9.67196e-07	5	X-Z	CPSF6 Knock-out
ZNF124	471.659	-0.408643	0.173154	-2.36	0.0182751	0.0821745	5	X-Z	CPSF6 Knock-out
PDP1	1092.72	-0.0100417	0.120597	-0.0832666	0.93364	0.975098	5	X-Z	CPSF6 Knock-out
FAM46C	5573.19	-0.113518	0.0603968	-1.87954	0.0601707	0.200003	5	X-Z	CPSF6 Knock-out
DBI	13328.6	-0.066103	0.0432669	-1.5278	0.126563	0.333943	5	X-Z	CPSF6 Knock-out
HRAT92	16.9574	0.656561	0.871455	0.753408	0.451205	0.706086	5	X-Z	CPSF6 Knock-out
RP5-1085F17.3	70.4932	-0.683867	0.491464	-1.39149	0.164077	0.3947	5	X-Z	CPSF6 Knock-out
DEPDC5	3540.75	0.0512411	0.0699875	0.732147	0.464079	0.71682	5	X-Z	CPSF6 Knock-out
KDM7A	12690.2	0.0599271	0.0511619	1.17132	0.241469	0.500004	5	X-Z	CPSF6 Knock-out
RP11-726G1.1	151.683	-0.966644	0.382042	-2.5302	0.0113997	0.0572342	5	X-Z	CPSF6 Knock-out
GAPDHP60	28.4304	-0.404407	0.673993	-0.600016	0.548495	0.777419	5	X-Z	CPSF6 Knock-out
ADCK4	2686.85	-0.173057	0.0805933	-2.14728	0.0317708	0.125386	5	X-Z	CPSF6 Knock-out
USP46-AS1	30.4123	0.240149	0.706556	0.339887	0.733942	0.881863	5	X-Z	CPSF6 Knock-out
SSFA2	6347.52	-0.0536293	0.0544894	-0.984215	0.32501	0.594026	5	X-Z	CPSF6 Knock-out
TP53BP1	11352.7	-0.00360756	0.0462482	-0.0780045	0.937825	0.976272	5	X-Z	CPSF6 Knock-out
GXYLT2	21.3679	0.536256	0.82598	0.649236	0.516186	0.754542	5	X-Z	CPSF6 Knock-out
AC105402.4	10.2696	0.198284	1.18291	0.167624	0.866879	NA	5	X-Z	CPSF6 Knock-out
TRMT1	7813.25	-0.0264281	0.0528773	-0.499801	0.617215	0.820405	5	X-Z	CPSF6 Knock-out
SUZ12	19447.1	0.0538081	0.0387424	1.38887	0.164872	0.395877	5	X-Z	CPSF6 Knock-out
AC253576.2	25.0201	-0.510694	0.737367	-0.692591	0.488566	0.735519	5	X-Z	CPSF6 Knock-out
HLA-L	429.427	0.238911	0.265283	0.900588	0.367807	0.634065	5	X-Z	CPSF6 Knock-out
MIR4435-2HG	1479.63	0.250267	0.0990969	2.52548	0.0115542	0.0578752	5	X-Z	CPSF6 Knock-out
ASB3	2604.35	0.218931	0.088151	2.48359	0.0130064	0.0633364	5	X-Z	CPSF6 Knock-out
NDUFS4	2483.18	-0.0860609	0.0872738	-0.986103	0.324083	0.593007	5	X-Z	CPSF6 Knock-out
U2SURP	21677.2	-0.0126847	0.0445449	-0.284761	0.775827	0.90399	5	X-Z	CPSF6 Knock-out
CTC-260E6.3	20.1571	-0.914434	0.832981	-1.09779	0.272298	0.537539	5	X-Z	CPSF6 Knock-out
ZNF25	672.041	-1.1515	0.148064	-7.77707	7.42206e-15	4.78982e-13	5	X-Z	CPSF6 Knock-out
HES2	484.398	0.869274	0.182147	4.77237	1.82072e-06	3.1271e-05	5	X-Z	CPSF6 Knock-out
RP11-849H4.4	208.852	-0.219865	0.307466	-0.715086	0.474556	0.724629	5	X-Z	CPSF6 Knock-out
RUVBL2	15693.3	-0.00847534	0.0424298	-0.19975	0.841676	0.935758	5	X-Z	CPSF6 Knock-out
GPR137B	581.762	0.113858	0.172654	0.659456	0.509603	0.750325	5	X-Z	CPSF6 Knock-out
TMEM38B	1199.79	-0.326788	0.1192	-2.74151	0.00611579	0.0346353	5	X-Z	CPSF6 Knock-out
SGK2	52.3147	-1.76713	0.751596	-2.35117	0.0187146	0.0837649	5	X-Z	CPSF6 Knock-out
SRSF4	27940.4	-0.162848	0.0398935	-4.08207	4.4637e-05	0.000533584	5	X-Z	CPSF6 Knock-out
FAM120A	33528.6	-0.145847	0.0396065	-3.68241	0.000231039	0.00220863	5	X-Z	CPSF6 Knock-out
AC078899.1	885.113	0.0870321	0.127997	0.679954	0.496533	0.740967	5	X-Z	CPSF6 Knock-out
WASH1	1634.25	0.0396478	0.0958626	0.41359	0.679174	0.855552	5	X-Z	CPSF6 Knock-out
RPS3AP47	275.737	0.000245231	0.236199	0.00103824	0.999172	0.999395	5	X-Z	CPSF6 Knock-out
TRBV20-1	2226.56	0.131779	0.0882161	1.49382	0.135222	0.348227	5	X-Z	CPSF6 Knock-out
DEPDC1B	4627.44	-0.132443	0.0838988	-1.5786	0.114427	0.313332	5	X-Z	CPSF6 Knock-out
LINC01002	304.197	0.037734	0.213882	0.176425	0.85996	0.943969	5	X-Z	CPSF6 Knock-out
SPTLC3	75.6787	0.0672032	0.459842	0.146144	0.883808	0.954412	5	X-Z	CPSF6 Knock-out
TTC34	65.8456	-0.308448	0.468005	-0.65907	0.509851	0.750444	5	X-Z	CPSF6 Knock-out
SLC9A8	3434.58	-0.0551378	0.0804359	-0.685487	0.493037	0.738619	5	X-Z	CPSF6 Knock-out
CIDECP	273.466	0.0102522	0.227385	0.0450872	0.964038	0.986029	5	X-Z	CPSF6 Knock-out
ARMC9	329.328	0.00239341	0.215042	0.01113	0.99112	0.99741	5	X-Z	CPSF6 Knock-out
TRABD	7226.66	0.0818232	0.0596977	1.37063	0.170492	0.40447	5	X-Z	CPSF6 Knock-out
GPR83	10.0812	1.64689	1.3322	1.23622	0.216377	NA	5	X-Z	CPSF6 Knock-out
LRRC56	279.075	0.212369	0.224815	0.944641	0.344842	0.61314	5	X-Z	CPSF6 Knock-out
CYTH1	24151.8	0.250438	0.037377	6.70033	2.07947e-11	8.95649e-10	5	X-Z	CPSF6 Knock-out
PARP11	2046.23	-0.984425	0.0895846	-10.9888	4.32761e-28	9.66251e-26	5	X-Z	CPSF6 Knock-out
CTD-2659N19.9	18.3462	-0.245782	0.893879	-0.274961	0.783346	0.907862	5	X-Z	CPSF6 Knock-out
ZDHHC11B	258.224	-0.446805	0.238024	-1.87714	0.0604983	0.200743	5	X-Z	CPSF6 Knock-out
HLA-H	8221.34	0.0200735	0.0560915	0.35787	0.72044	0.874824	5	X-Z	CPSF6 Knock-out
LAT2	1374.31	0.0948655	0.113857	0.833201	0.404732	0.668643	5	X-Z	CPSF6 Knock-out
TSN	8033.53	-0.51158	0.0573176	-8.92535	4.44274e-19	4.41466e-17	5	X-Z	CPSF6 Knock-out
PER1	11048.8	0.319728	0.0474668	6.73582	1.6301e-11	7.1317e-10	5	X-Z	CPSF6 Knock-out
TAB2	30943.5	0.0195551	0.0403279	0.484902	0.627746	0.825981	5	X-Z	CPSF6 Knock-out
RP11-849F2.7	16.862	-0.0830377	3.10857	-0.0267125	0.978689	0.992674	5	X-Z	CPSF6 Knock-out
DERA	2020.56	-0.155767	0.0936967	-1.66246	0.0964212	0.279675	5	X-Z	CPSF6 Knock-out
PIGN	4266.01	0.0748431	0.0766489	0.97644	0.328846	0.598	5	X-Z	CPSF6 Knock-out
NOL8	10311.8	-0.0925385	0.0490713	-1.8858	0.0593225	0.198098	5	X-Z	CPSF6 Knock-out
RPS27A	73829.9	-0.243809	0.132525	-1.83972	0.0658096	0.213719	5	X-Z	CPSF6 Knock-out
AKR7A2	3288.9	-0.033298	0.0781459	-0.426101	0.670034	0.850903	5	X-Z	CPSF6 Knock-out
PSMC6	10909.6	-0.0455996	0.0529128	-0.861787	0.388804	0.65322	5	X-Z	CPSF6 Knock-out
AL162590.1	24.0164	-3.54739	1.26584	-2.80239	0.0050725	0.0299312	5	X-Z	CPSF6 Knock-out
RP11-111M22.2	461.888	0.172253	0.182303	0.944871	0.344725	0.613006	5	X-Z	CPSF6 Knock-out
RP5-991G20.1	626.892	-0.113923	0.162256	-0.702121	0.482604	0.731132	5	X-Z	CPSF6 Knock-out
POLG2	2286.67	-0.0397604	0.093162	-0.426788	0.669534	0.850602	5	X-Z	CPSF6 Knock-out
HIST1H2AG	83.6854	-0.562929	0.401849	-1.40085	0.16126	0.390262	5	X-Z	CPSF6 Knock-out
IGFBP4	12555.8	0.330167	0.0584377	5.64989	1.60549e-08	4.22583e-07	5	X-Z	CPSF6 Knock-out
MCM8-AS1	6.14399	0.671301	1.59942	0.419715	0.674694	NA	5	X-Z	CPSF6 Knock-out
TTLL3	4292.48	-0.372582	0.0782631	-4.76064	1.92982e-06	3.27682e-05	5	X-Z	CPSF6 Knock-out
MVB12B	352.892	-0.393022	0.203258	-1.93361	0.0531611	0.182835	5	X-Z	CPSF6 Knock-out
HNRNPH1	55955.8	-0.0250755	0.036974	-0.678193	0.49765	0.742005	5	X-Z	CPSF6 Knock-out
USP41	88.7327	-0.277939	0.404178	-0.687665	0.491663	0.737951	5	X-Z	CPSF6 Knock-out
AC005077.8	15.2698	0.733641	0.948821	0.773213	0.439396	0.69687	5	X-Z	CPSF6 Knock-out
DHRS13	2816.46	0.119495	0.078926	1.51401	0.130024	0.339842	5	X-Z	CPSF6 Knock-out
SRGAP2B	1885.46	-0.0376356	0.100145	-0.37581	0.707058	0.869609	5	X-Z	CPSF6 Knock-out
RP11-252K23.2	19.7169	0.114931	0.997858	0.115178	0.908304	0.964037	5	X-Z	CPSF6 Knock-out
C1orf198	1769.96	0.157322	0.102301	1.53783	0.12409	0.330018	5	X-Z	CPSF6 Knock-out
CNKSR3	93.284	0.146901	0.452229	0.324837	0.745305	0.887833	5	X-Z	CPSF6 Knock-out
HNRNPC	69435.6	-0.162148	0.0315453	-5.14018	2.7447e-07	5.64189e-06	5	X-Z	CPSF6 Knock-out
TMEM14B	6567.8	-0.0141516	0.0548899	-0.257818	0.796547	0.914314	5	X-Z	CPSF6 Knock-out
ITM2C	2375.89	0.235644	0.0903349	2.60856	0.00909247	0.0477157	5	X-Z	CPSF6 Knock-out
RPSA	164536	-0.0203257	0.0301494	-0.674167	0.500205	0.743419	5	X-Z	CPSF6 Knock-out
RP5-1068E13.7	80.966	0.310241	0.429959	0.721559	0.470566	0.721333	5	X-Z	CPSF6 Knock-out
ARPC4	30907.7	0.055377	0.0352857	1.56939	0.116557	0.317504	5	X-Z	CPSF6 Knock-out
OMA1	796.732	-0.238485	0.135157	-1.7645	0.0776477	0.239756	5	X-Z	CPSF6 Knock-out
PPP1R12B	2777.91	-0.134123	0.0927218	-1.44651	0.148034	0.369419	5	X-Z	CPSF6 Knock-out
PICK1	1313.58	-0.0515521	0.105879	-0.486894	0.626333	0.825613	5	X-Z	CPSF6 Knock-out
SH3YL1	2965.79	0.171005	0.0813325	2.10255	0.0355056	0.136169	5	X-Z	CPSF6 Knock-out
XX-FW83563B9.5	321.515	-0.175298	0.213386	-0.821506	0.411358	0.673636	5	X-Z	CPSF6 Knock-out
ATP8B1	49.9417	0.159045	0.518161	0.306941	0.758888	0.895861	5	X-Z	CPSF6 Knock-out
RP11-1228E12.2	26.8705	-0.210532	0.717803	-0.293301	0.769292	0.900387	5	X-Z	CPSF6 Knock-out
LRP1	2373.27	0.268207	0.0931612	2.87896	0.0039899	0.0245654	5	X-Z	CPSF6 Knock-out
LINC00910	213.062	-0.163695	0.329206	-0.497242	0.619019	0.821622	5	X-Z	CPSF6 Knock-out
TMEM54	42.3459	-0.509672	0.583644	-0.873258	0.382522	0.647533	5	X-Z	CPSF6 Knock-out
AC025171.1	68.1646	-0.250255	0.469158	-0.533414	0.593747	0.805471	5	X-Z	CPSF6 Knock-out
[truncated: 60,725 more rows]
