# Supplementary material for: Disruption of CPSF6 enhances cellular permissivity to HIV-1 infection through alternative polyadenylation
Source: Research Square preprint supplement (doi:10.21203/rs.3.rs-5099896/v1), 2024-12-04
Supplement: Supplementary file 3 [file 8c72d15917ad987d1a735018.docx]

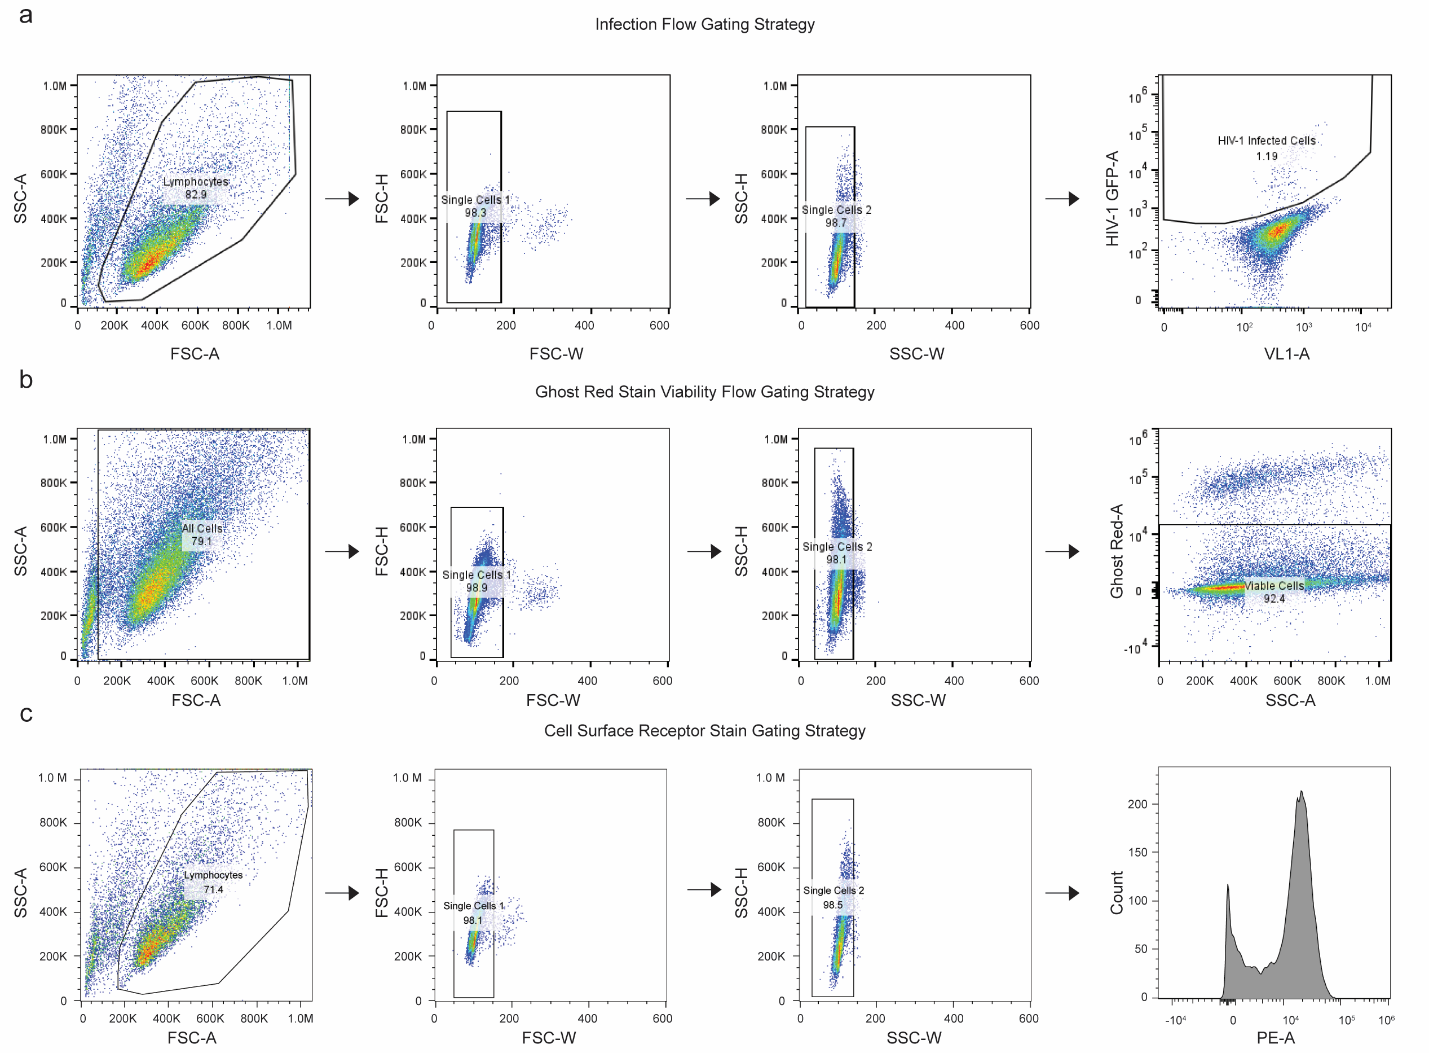


**Supplementary Figure 1 | Flow Cytometry Gating Strategy.** a, Flow gating strategy for quantification of percent HIV-1 NL4-3 nef:IRES:GFP infected primary CD4+ T cells through sequential application of a lymphocyte gate, two single-cell gates, and GFP autofluorescence exclusion (FlowJo v10.10). b, Flow gating strategy for quantification of percent viable primary CD4+ T cells through sequential application of an all-cell gate, two single-cell gates, and a fluorophore gate (FlowJo v10.10). c, Flow gating strategy for quantification of fluorescence intensity of cell surface receptors through sequential application of a lymphocyte gate, two single-cell gates, and a histogram showing cell count versus fluorescence intensity measurement of the fluorophore of interest (FlowJo v10.10).

**Supplementary Table 1 | Statistical Analysis Table.** Excel table contains a full description of statistical tests performed in this study, with tabs corresponding to each figure.

**Supplementary Table 2 | Processed Primary CD4+ T cell RNA-sequencing Data.** Excel table contains full processed datasets for all primary CD4+ T cell RNA-sequencing experiments performed in this study, with tabs corresponding to each figure.
